# Supplementary material for: Expandable and reversible copy number amplification drives rapid adaptation to antifungal drugs
Source: eLife. 2020 Jul 20;9:e58349. doi: 10.7554/eLife.58349 (PMC7371428; doi:10.7554/eLife.58349)
Supplement: Figure 2—source data 1. [file elife-58349-fig2-data1.xlsx]

## Sheet: Fluconazole_24Hours
Figure 2 - Figure Supplement 1: Minimum inhibitory concentration raw data
						24 hours fluconazole (ug/ml)
Isolate	No Drug	0.5	1	2	4	8	16	32	64	128	256
SC5314	1.003	0.212	0.037	0.026	0.027	0.026	0.023	0.027	0.026	0.028	0.027
SC5314	1.044	0.202	0.094	0.093	0.087	0.08	0.08	0.083	0.078	0.087	0.079
SC5314	1.11	0.26	0.1	0.086	0.079	0.08	0.077	0.079	0.083	0.088	0.083
AMS4702	0.233	0.045	0.007	0.006	0.004	0.004	0.005	0.004	0.003	0.004	0
AMS4702	0.672	0.243	0.069	0.066	0.064	0.064	0.067	0.063	0.057	0.063	0.058
AMS4702	0.616	0.11	0.065	0.064	0.059	0.063	0.065	0.064	0.063	0.068	0.066
P75016	0.663	0.746	0.284	0.063	0.01	0.005	0.006	0.008	0.008	0.008	0.006
P75016	0.72	0.756	0.281	0.055	0.013	0.007	0.006	0.005	0.006	0.008	0.009
P75016	0.829	0.983	0.139	0.025	0.008	0.007	0.006	0.006	0.007	0.008	0.007
AMS4397	0.681	0.655	0.797	0.625	0.091	0.019	0.01	0.007	0.014	0.008	0.011
AMS4397	0.691	0.636	0.7	0.723	0.142	0.029	0.013	0.011	0.009	0.01	0.007
AMS4397	0.626	0.658	0.605	0.624	0.159	0.032	0.014	0.012	0.009	0.009	0.008
P78042	0.798	0.793	0.167	0.048	0.043	0.042	0.025	0.036	0.07	0.112	0.031
P78042	0.83	0.763	0.162	0.046	0.037	0.038	0.036	0.038	0.044	0.045	0.046
P78042	0.933	0.895	0.085	0.033	0.035	0.03	0.031	0.035	0.043	0.048	0.054
AMS4444	0.828	0.803	0.895	0.309	0.116	0.114	0.069	0.039	0.077	0.072	0.094
AMS4444	0.693	0.642	0.726	0.502	0.104	0.081	0.072	0.074	0.06	0.068	0.073
AMS4444	0.693	0.905	1.033	0.619	0.128	0.195	0.13	0.127	0.104	0.078	0.094
P75063	1.004	0.167	0.126	0.139	0.104	0.103	0.093	0.089	0.099	0.107	0.098
P75063	1.083	0.168	0.121	0.107	0.102	0.094	0.095	0.091	0.095	0.108	0.103
P75063	1.053	0.058	0.061	0.057	0.055	0.056	0.057	0.044	0.049	0.089	0.033
ANS4104	0.801	0.698	0.4	0.051	0.037	0.031	0.029	0.023	0.021	0.023	0.012
AMS4104	0.823	0.718	0.406	0.051	0.038	0.036	0.03	0.022	0.02	0.02	0.006
AMS4104	0.85	0.702	0.453	0.045	0.035	0.035	0.027	0.024	0.021	0.02	0.004
AMS4105	0.902	0.911	0.719	0.338	0.186	0.19	0.192	0.186	0.191	0.223	0.224
AMS4105	0.951	0.937	0.699	0.204	0.208	0.21	0.191	0.192	0.215	0.234	0.241
AMS4106	1.032	1.091	0.906	0.11	0.093	0.087	0.073	0.074	0.073	0.07	0.071
AMS4106	0.951	1.003	0.924	0.161	0.094	0.084	0.077	0.072	0.072	0.065	0.065
AMS4107	0.919	0.476	0.427	0.285	0.103	0.11	0.097	0.096	0.087	0.106	0.095
AMS4107	1.004	0.432	0.444	0.237	0.104	0.107	0.1	0.098	0.099	0.11	0.105

## Sheet: Fluconazole_48Hours
Figure 2 - Figure Supplement 1: Minimum inhibitory concentration raw data
						48 hours fluconazole (ug/ml)
Isolate	No Drug	0.5	1	2	4	8	16	32	64	128	256
SC5314	0.731	0.752	0.492	0.116	0.03	0.024	0.017	0.024	0.01	0.034	0.02
SC5314	0.983	0.706	0.13	0.123	0.101	0.099	0.1	0.098	0.107	0.127	0.115
SC5314	0.802	0.74	0.579	0.119	0.029	0.039	0.016	0.026	0.01	0.031	0.014
AMS4702	0.969	0.896	0.319	0.126	0.123	0.14	0.127	0.085	0.064	0.108	0.154
AMS4702	0.984	0.659	0.277	0.092	0.054	0.079	0.072	0.082	0.09	0.131	0.134
AMS4702	0.897	0.965	0.861	0.116	0.08	0.05	0.04	0.108	0.059	0.061	0.085
P75016	0.816	0.805	0.637	0.126	0.027	0.017	0.014	0.01	0.014	0.016	0.006
P75016	0.818	0.775	0.6	0.13	0.033	0.028	0.014	0.02	0.024	0.02	0.019
P75016	0.836	0.74	0.387	0.058	0.023	0.014	0.011	0.014	0.01	0.015	0.013
AMS4397	0.704	0.673	0.677	0.572	0.448	0.146	0.088	0.05	0.034	0.042	0.042
AMS4397	0.672	0.687	0.645	0.659	0.473	0.164	0.106	0.081	0.065	0.078	0.043
AMS4397	0.696	0.69	0.723	0.629	0.498	0.052	0.04	0.037	0.039	0.04	0.028
P78042	0.869	0.812	0.386	0.09	0.075	0.076	0.079	0.082	0.106	0.138	0.134
P78042	0.745	0.803	0.27	0.098	0.087	0.088	0.086	0.089	0.128	0.141	0.16
P78042	0.849	0.78	0.212	0.079	0.083	0.082	0.075	0.097	0.127	0.156	0.148
AMS4444	0.811	0.777	0.808	0.657	0.288	0.251	0.257	0.223	0.262	0.287	0.308
AMS4444	0.738	0.72	0.694	0.675	0.272	0.255	0.267	0.265	0.3	0.305	0.337
AMS4444	0.794	0.78	0.78	0.591	0.312	0.266	0.292	0.294	0.326	0.336	0.357
P75063	1.014	0.372	0.199	0.164	0.133	0.132	0.105	0.113	0.126	0.158	0.115
P75063	1.066	0.559	0.243	0.168	0.122	0.1	0.098	0.112	0.12	0.121	0.122
P75063	1.116	0.372	0.167	0.138	0.108	0.091	0.093	0.082	0.116	0.14	0.127
ANS4104	0.856	0.988	0.978	0.235	0.126	0.091	0.098	0.092	0.097	0.089	0.088
AMS4104	0.839	1	0.946	0.277	0.145	0.107	0.113	0.1	0.114	0.096	0.097
AMS4104	0.872	1.081	0.97	0.263	0.145	0.12	0.112	0.098	0.107	0.113	0.099
AMS4105	0.731	0.704	0.799	0.778	0.618	0.575	0.566	0.58	0.556	0.569	0.451
AMS4105	0.942	0.794	0.87	0.613	0.466	0.416	0.493	0.413	0.421	0.508	0.487
AMS4105	0.864	0.935	0.986	0.536	0.491	0.506	0.487	0.457	0.509	0.532	0.506
AMS4106	1.028	1.008	1.092	0.483	0.164	0.094	0.061	0.05	0.049	0.04	0.03
AMS4106	1.128	0.99	1.008	0.224	0.105	0.073	0.067	0.052	0.066	0.042	0.04
AMS4106	1.135	1.169	1.157	0.177	0.101	0.078	0.06	0.057	0.058	0.054	0.044
AMS4107	0.924	0.761	0.836	0.363	0.154	0.12	0.116	0.133	0.149	0.168	0.135
AMS4107	1.052	0.825	0.823	0.799	0.226	0.162	0.209	0.237	0.225	0.231	0.209
AMS4107	0.968	0.83	0.831	0.674	0.21	0.186	0.192	0.179	0.221	0.231	0.213

## Sheet: Miconazole_24Hours
Figure 2 - Figure Supplement 1: Minimum inhibitory concentration raw data
						24 hours miconazole (ug/ml)
Isolate	No Drug	0.0078125	0.015625	0.03125	0.0625	0.125	0.25	0.5	1	2	4
SC5314	0.988	0.051	0.033	0.027	0.029	0.028	0.036	0.042	0.088	0.035	0.01
SC5314	0.944	0.04	0.037	0.032	0.033	0.034	0.034	0.039	0.044	0.022	0.004
SC5314	1.021	0.306	0.045	0.035	0.035	0.042	0.04	0.053	0.061	0.043	0.008
AMS4702	0.466	0.014	0.011	0.011	0.012	0.007	0.012	0.019	0.02	0.006	-0.001
AMS4702	0.58	0.028	0.013	0.01	0.009	0.009	0.013	0.017	0.022	0.01	0.001
AMS4702	0.32	0.076	0.01	0.004	0.004	0.004	0.005	0.006	0.011	0.005	0.001
P75016	0.835	0.015	0.01	0.008	0.005	0.005	0.005	0.005	0.005	0.008	0.009
P75016	1.102	0.023	0.011	0.009	0.005	0.008	0.005	0.004	0.011	0.005	0.003
P75016	0.831	0.014	0.006	0.005	0.004	0.003	0.005	0.006	0.006	0.005	0.008
AMS4397	0.76	0.618	0.107	0.034	0.015	0.012	0.015	0.027	0.037	0.017	0.008
AMS4397	0.916	0.52	0.126	0.034	0.018	0.016	0.014	0.018	0.034	0.023	0.004
AMS4397	0.714	0.488	0.13	0.034	0.021	0.02	0.017	0.02	0.036	0.026	0.007
P78042	0.933	0.046	0.04	0.044	0.042	0.046	0.041	0.038	0.041	0.034	0.006
P78042	1.163	0.063	0.052	0.038	0.034	0.045	0.036	0.041	0.058	0.014	0.001
P78042	1.01	0.059	0.037	0.049	0.042	0.045	0.064	0.078	0.066	0.017	0.007
AMS4444	0.947	0.718	0.154	0.107	0.083	0.099	0.094	0.117	0.072	0.011	0.005
AMS4444	1.001	0.854	0.355	0.117	0.197	0.154	0.106	0.083	0.083	0.014	0.002
AMS4444	0.815	0.561	0.22	0.143	0.103	0.086	0.085	0.072	0.044	0.016	0.009
P75063	0.989	0.172	0.086	0.093	0.069	0.069	0.069	0.105	0.117	0.088	0.006
P75063	1.001	0.18	0.09	0.109	0.062	0.064	0.065	0.075	0.064	0.044	0.007
P75063	0.995	0.157	0.105	0.062	0.063	0.067	0.071	0.074	0.077	0.044	0.008
ANS4104	0.655	0.611	0.094	0.052	0.042	0.037	0.033	0.038	0.051	0.019	0
AMS4104	0.718	0.646	0.128	0.04	0.043	0.039	0.037	0.039	0.049	0.024	-0.001
AMS4104	0.811	0.72	0.144	0.048	0.043	0.038	0.038	0.05	0.06	0.022	0
AMS4105	0.811	0.653	0.241	0.19	0.174	0.141	0.024	0.149	0.122	0.055	0.012
AMS4105	0.922	0.797	0.262	0.209	0.195	0.17	0.169	0.144	0.152	0.042	0.022
AMS4106	0.933	0.248	0.067	0.051	0.032	0.002	0.002	0.033	0.031	0.012	-0.001
AMS4106	0.927	0.385	0.092	0.049	0.033	0.029	0.028	0.032	0.031	0.011	0.008
AMS4107	0.894	0.176	0.074	0.056	0.057	0.052	0.004	0.051	0.033	0.008	0.001
AMS4107	0.942	0.232	0.085	0.062	0.057	0.058	0.05	0.048	0.048	0.006	0.003

## Sheet: Miconazole_48Hours
Figure 2 - Figure Supplement 1: Minimum inhibitory concentration raw data
						48 hours miconazole (ug/ml)
Isolate	No Drug	0.0078125	0.015625	0.03125	0.0625	0.125	0.25	0.5	1	2	4
SC5314	0.815	0.687	0.192	0.155	0.137	0.14	0.142	0.16	0.19	0.125	0.012
SC5314	1.051	0.995	0.232	0.15	0.132	0.145	0.141	0.157	0.191	0.14	0.013
SC5314	0.838	0.749	0.062	0.065	0.032	0.019	0.026	0.05	0.066	0.067	0.012
AMS4702	1.014	0.874	0.346	0.132	0.111	0.102	0.131	0.153	0.211	0.169	0.005
AMS4702	0.918	0.969	0.638	0.11	0.077	0.171	0.12	0.089	0.148	0.137	0.006
AMS4702	0.781	0.827	0.231	0.1	0.075	0.074	0.1	0.14	0.208	0.149	0.007
P75016	0.814	0.24	0.084	0.035	0.013	0.011	0.007	0.015	0.028	0.025	0.01
P75016	1.084	0.594	0.123	0.045	0.019	0.016	0.017	0.041	0.053	0.027	0.006
P75016	0.933	0.31	0.059	0.024	0.024	0.022	0.015	0.037	0.055	0.023	0.008
AMS4397	0.685	0.683	0.682	0.35	0.134	0.06	0.032	0.057	0.114	0.113	0.007
AMS4397	0.912	0.994	0.928	0.423	0.153	0.071	0.046	0.051	0.127	0.107	0.009
AMS4397	0.735	0.89	0.748	0.552	0.166	0.086	0.055	0.083	0.151	0.093	0.011
P78042	0.87	0.251	0.122	0.087	0.099	0.087	0.09	0.104	0.096	0.097	0.006
P78042	1.067	0.373	0.128	0.183	0.111	0.108	0.121	0.12	0.113	0.068	0.004
P78042	1.106	0.366	0.204	0.185	0.166	0.158	0.139	0.164	0.155	0.09	0.007
AMS4444	0.757	0.849	0.741	0.56	0.392	0.33	0.267	0.259	0.209	0.106	0.009
AMS4444	1.013	1.042	1.006	0.563	0.434	0.384	0.344	0.321	0.23	0.082	0.005
AMS4444	0.949	1.046	1.043	0.683	0.538	0.459	0.393	0.45	0.277	0.104	0.008
P75063	0.962	0.959	0.275	0.189	0.142	0.111	0.129	0.137	0.126	0.223	0.025
P75063	0.945	0.965	0.242	0.153	0.117	0.117	0.114	0.108	0.107	0.134	0.027
P75063	0.986	1.003	0.266	0.155	0.16	0.105	0.121	0.123	0.123	0.137	0.033
ANS4104	0.727	0.87	0.79	0.18	0.132	0.116	0.131	0.132	0.175	0.172	0.006
AMS4104	0.745	0.89	0.824	0.186	0.132	0.12	0.139	0.142	0.166	0.175	0.005
AMS4104	0.811	0.916	0.795	0.231	0.145	0.12	0.136	0.16	0.175	0.178	0.004
AMS4105	0.857	0.777	0.778	0.871	0.749	0.627	0.492	0.476	0.385	0.261	0.073
AMS4105	0.707	0.816	0.918	0.676	0.531	0.548	0.332	0.482	0.421	0.213	0.033
AMS4105	0.977	1.028	0.985	0.689	0.584	0.524	0.505	0.497	0.42	0.23	0.024
AMS4106	1.182	1.152	1.047	0.217	0.095	0.073	0.073	0.081	0.08	0.037	0.007
AMS4106	1.011	0.986	0.96	0.191	0.096	0.053	0.037	0.083	0.081	0.035	0
AMS4106	1.101	1.128	1.069	1.017	0.222	0.132	0.137	0.084	0.126	0.038	0.013
AMS4107	1.027	0.949	0.858	0.196	0.136	0.143	0.123	0.121	0.12	0.081	0.014
AMS4107	0.892	0.766	0.359	0.236	0.337	0.182	0.122	0.171	0.149	0.021	0.002
AMS4107	1.076	0.914	0.831	0.266	0.209	0.206	0.195	0.202	0.171	0.023	0.003
AMS3050	0.76	0.623	0.69	0.595	0.744	0.715	0.429	0.064	0.009	0.018	0.007
AMS3050	0.807	0.843	0.794	0.686	0.765	0.619	0.488	0.06	0.009	0.011	0.01
AMS3050	0.767	0.786	0.682	0.732	0.691	0.7	0.477	0.058	0.011	0.01	0.008
AMS3053	0.848	0.908	0.853	0.82	0.817	0.792	0.707	0.293	0.094	0.085	0.014
AMS3053	0.813	0.868	0.873	0.695	0.778	0.737	0.673	0.242	0.06	0.046	0.018
AMS3053	0.843	0.737	0.806	0.877	0.789	0.793	0.778	0.328	0.077	0.058	0.019
AMS3054	0.781	0.668	0.857	0.817	0.798	0.824	0.657	0.531	0.2	0.107	0.026
AMS3054	0.807	0.855	0.853	0.808	0.783	0.829	0.656	0.399	0.155	0.104	0.029
AMS3054	0.821	0.878	0.843	0.896	0.873	0.823	0.755	0.696	0.252	0.155	0.026
AMS3052	0.755	0.837	0.77	0.812	0.814	0.814	0.788	0.639	0.581	0.396	0.073
AMS3052	0.754	0.82	0.8	0.687	0.776	0.672	0.77	0.436	0.374	0.353	0.07
AMS3052	0.717	0.637	0.718	0.734	0.745	0.79	0.677	0.487	0.435	0.324	0.066
AMS3051	0.861	0.848	0.841	0.744	0.829	0.704	0.817	0.465	0.42	0.413	0.071
AMS3051	0.821	0.879	0.844	0.866	0.855	0.873	0.847	0.642	0.584	0.446	0.09
AMS3051	0.712	0.696	0.835	0.787	0.795	0.834	0.748	0.484	0.394	0.361	0.076
AMS3094	0.837	0.888	0.852	0.888	0.902	0.886	0.931	0.797	0.985	0.419	0.114
AMS3094	0.905	0.934	0.949	0.999	1.083	0.764	0.945	0.827	0.903	0.423	0.06
AMS3094	1.018	0.998	1.035	1	1.004	1.061	1.012	0.911	0.942	0.546	0.109
AMS3092	0.731	0.78	0.695	0.474	0.817	0.782	0.835	0.626	0.498	0.115	0.084
AMS3092	0.861	0.8	0.716	0.892	1.048	1.037	1.002	0.997	0.397	0.015	0.01
AMS3092	1.009	0.934	0.873	0.893	0.864	0.869	1.022	0.918	0.403	0.083	0.079
AMS3093	1.019	1	0.966	0.935	0.957	1.001	1.04	0.743	0.215	0.056	0.025
AMS3093	0.956	0.94	0.899	0.961	0.994	0.864	0.961	0.609	0.278	0.024	0.003
AMS3093	0.815	0.812	0.78	0.831	0.838	0.831	0.855	0.643	0.221	0.071	0.036

## Sheet: Itraconazole_24Hours
	Figure 2 - Figure Supplement 1: Minimum inhibitory concentration raw data
						24 hours itraconazole (ug/ml)
Isolate	No Drug	0.0078125	0.015625	0.03125	0.0625	0.125	0.25	0.5	1	2	4
SC5314	1.024	0.033	0.034	0.032	0.029	0.034	0.03	0.035	0.036	0.04	0.038
SC5314	0.999	0.032	0.029	0.029	0.028	0.031	0.027	0.023	0.034	0.035	0.036
SC5314	0.95	0.031	0.022	0.019	0.014	0.018	0.018	0.015	0.017	0.02	0.025
AMS4702	0.589	0.015	0.01	0.013	0.01	0.012	0.012	0.009	0.015	0.014	0.014
AMS4702	0.572	0.011	0.013	0.012	0.014	0.013	0.011	0.013	0.014	0.012	0.009
AMS4702	0.855	0.036	0.021	0.018	0.017	0.021	0.02	0.018	0.019	0.023	0.029
P75016	1.002	0.032	0.02	0.017	0.014	0.014	0.013	0.013	0.013	0.014	0.014
P75016	0.994	0.024	0.013	0.011	0.01	0.008	0.008	0.01	0.016	0.025	0.016
AMS4397	0.497	0.049	0.038	0.03	0.027	0.026	0.029	0.022	0.036	0.045	0.028
AMS4397	0.47	0.045	0.039	0.032	0.027	0.021	0.033	0.025	0.032	0.028	0.03
AMS4397	0.721	0.182	0.07	0.051	0.036	0.044	0.036	0.036	0.036	0.04	0.035
P78042	0.916	0.091	0.071	0.07	0.058	0.081	0.058	0.058	0.06	0.085	0.064
P78042	0.925	0.054	0.054	0.057	0.058	0.062	0.06	0.055	0.1	0.086	0.053
P78042	0.671	0.109	0.091	0.091	0.074	0.074	0.079	0.07	0.131	0.124	0.111
AMS4444	0.658	0.129	0.12	0.109	0.095	0.15	0.084	0.1	0.087	0.085	0.082
AMS4444	0.634	0.187	0.143	0.113	0.093	0.095	0.093	0.063	0.078	0.079	0.073
AMS4444	0.671	0.109	0.091	0.091	0.074	0.074	0.079	0.07	0.131	0.124	0.111
P75063	1.052	0.055	0.047	0.048	0.051	0.057	0.051	0.047	0.044	0.047	0.045
P75063	0.978	0.048	0.047	0.053	0.054	0.052	0.048	0.053	0.051	0.049	0.044
P75063	0.955	0.056	0.058	0.045	0.035	0.066	0.038	0.036	0.039	0.041	0.045
ANS4104	0.965	0.047	0.045	0.048	0.034	0.073	0.047	0.043	0.038	0.041	0.034
AMS4104	0.954	0.046	0.035	0.039	0.035	0.035	0.034	0.034	0.042	0.041	0.036
AMS4104	0.944	0.083	0.055	0.046	0.038	0.045	0.04	0.045	0.037	0.036	0.025
AMS4105	0.812	0.129	0.147	0.141	0.13	0.158	0.158	0.14	0.151	0.132	0.134
AMS4105	0.932	0.17	0.18	0.184	0.171	0.172	0.164	0.171	0.156	0.148	0.137
AMS4106	0.922	0.03	0.021	0.018	0.023	0.025	0.025	0.027	0.024	0.025	0.014
AMS4106	0.899	0.03	0.024	0.02	0.018	0.023	0.022	0.016	0.02	0.019	0.012
AMS4107	0.888	0.063	0.049	0.043	0.049	0.044	0.046	0.049	0.052	0.048	0.042
AMS4107	0.868	0.07	0.058	0.051	0.05	0.045	0.05	0.039	0.054	0.054	0.035

## Sheet: Itraconazole_48Hours
Figure 2 - Figure Supplement 1: Minimum inhibitory concentration raw data
						48 hours itraconazole (ug/ml)
Isolate	No Drug	0.0078125	0.015625	0.03125	0.0625	0.125	0.25	0.5	1	2	4
SC5314	0.914	0.212	0.158	0.164	0.152	0.159	0.152	0.163	0.157	0.171	0.167
SC5314	0.93	0.249	0.181	0.184	0.163	0.164	0.147	0.142	0.15	0.173	0.183
SC5314	1.073	0.305	0.116	0.123	0.106	0.11	0.112	0.111	0.113	0.128	0.147
AMS4702	0.972	0.422	0.139	0.122	0.185	0.114	0.098	0.113	0.117	0.128	0.175
AMS4702	0.862	0.27	0.137	0.213	0.178	0.148	0.182	0.152	0.14	0.148	0.125
AMS4702	0.931	0.263	0.248	0.149	0.151	0.1	0.136	0.101	0.113	0.121	0.162
P75016	0.964	0.2	0.082	0.15	0.061	0.049	0.05	0.025	0.052	0.046	0.075
P75016	0.985	0.055	0.04	0.032	0.045	0.02	0.025	0.018	0.026	0.038	0.026
P75016	1.008	0.151	0.054	0.036	0.042	0.031	0.027	0.037	0.035	0.025	0.021
AMS4397	0.837	0.718	0.405	0.29	0.303	0.199	0.157	0.153	0.205	0.266	0.226
AMS4397	0.793	0.497	0.315	0.232	0.173	0.089	0.142	0.097	0.122	0.129	0.114
AMS4397	0.893	0.902	0.341	0.259	0.175	0.13	0.116	0.096	0.107	0.128	0.123
P78042	1.081	0.232	0.211	0.197	0.194	0.244	0.195	0.204	0.206	0.213	0.213
P78042	1.069	0.332	0.252	0.228	0.216	0.198	0.197	0.192	0.18	0.219	0.229
P78042	1.095	0.255	0.21	0.216	0.209	0.245	0.206	0.213	0.208	0.208	0.23
AMS4444	0.906	0.765	0.418	0.365	0.307	0.341	0.368	0.406	0.407	0.434	0.358
AMS4444	0.856	0.967	0.543	0.478	0.47	0.415	0.412	0.431	0.389	0.432	0.468
AMS4444	0.917	0.932	0.556	0.485	0.475	0.447	0.437	0.476	0.434	0.415	0.392
P75063	0.974	0.206	0.172	0.139	0.138	0.131	0.118	0.119	0.124	0.124	0.13
P75063	1.162	0.363	0.212	0.225	0.165	0.154	0.147	0.142	0.141	0.152	0.171
P75063	1.114	0.222	0.162	0.145	0.124	0.139	0.141	0.133	0.128	0.135	0.149
ANS4104	1.077	0.267	0.193	0.168	0.158	0.166	0.162	0.163	0.155	0.151	0.14
AMS4104	0.902	0.195	0.162	0.173	0.158	0.158	0.138	0.138	0.136	0.134	0.126
AMS4104	1.045	0.248	0.167	0.169	0.142	0.149	0.138	0.136	0.139	0.134	0.139
AMS4105	0.739	0.941	0.745	0.683	0.68	0.685	0.587	0.58	0.542	0.525	0.514
AMS4105	0.972	0.763	0.676	0.641	0.611	0.601	0.607	0.554	0.534	0.541	0.542
AMS4105	0.874	0.691	0.608	0.625	0.608	0.58	0.562	0.545	0.541	0.558	0.513
AMS4106	0.935	0.319	0.121	0.085	0.07	0.065	0.056	0.053	0.053	0.052	0.057
AMS4106	1.107	0.238	0.124	0.117	0.098	0.087	0.083	0.084	0.074	0.086	0.058
AMS4106	1.18	0.257	0.184	0.141	0.113	0.097	0.095	0.074	0.077	0.066	0.082
AMS4107	1.128	0.367	0.353	0.344	0.34	0.33	0.308	0.279	0.28	0.257	0.271
AMS4107	0.997	0.393	0.327	0.313	0.3	0.276	0.301	0.268	0.271	0.275	0.231
AMS4107	0.834	0.228	0.18	0.169	0.162	0.165	0.154	0.143	0.155	0.149	0.168

## Sheet: Ketoconazole_24Hours
Figure 2 - Figure Supplement 1: Minimum inhibitory concentration raw data
						24 hours ketoconazole (ug/ml)
Isolate	No Drug	0.0078125	0.015625	0.03125	0.0625	0.125	0.25	0.5	1	2	4
SC5314	0.993	0.036	0.034	0.028	0.031	0.029	0.03	0.03	0.032	0.031	0.022
SC5314	1.032	0.039	0.041	0.041	0.035	0.039	0.035	0.036	0.036	0.04	0.026
SC5314	1.032	0.036	0.035	0.033	0.028	0.036	0.034	0.036	0.039	0.037	0.025
AMS4702	0.316	0.01	0.014	0.01	0.012	0.014	0.012	0.013	0.015	0.018	0.016
AMS4702	0.655	0.012	0.018	0.014	0.014	0.015	0.015	0.017	0.013	0.019	0.02
AMS4702	0.224	0.006	0.005	0.006	0.008	0.005	0.004	0.005	0.006	0.007	0.003
P75016	1.058	0.006	0.006	0.006	0.005	0.005	0.007	0.006	0.006	0.014	0.004
P75016	1.094	0.005	0.006	0.006	0.006	0.005	0.005	0.005	0.006	0.005	0.004
P75016	1.118	0.007	0.007	0.006	0.006	0.007	0.007	0.006	0.007	0.007	0.006
AMS4397	0.922	0.016	0.013	0.015	0.017	0.018	0.02	0.027	0.042	0.046	0.038
AMS4397	0.876	0.018	0.016	0.016	0.018	0.016	0.02	0.023	0.039	0.041	0.029
AMS4397	0.895	0.017	0.014	0.019	0.017	0.02	0.025	0.028	0.033	0.043	0.033
P78042	1.102	0.055	0.057	0.05	0.051	0.048	0.044	0.049	0.046	0.03	0.013
P78042	1.046	0.043	0.049	0.051	0.051	0.048	0.051	0.044	0.04	0.026	0.01
P78042	1.147	0.046	0.05	0.053	0.054	0.044	0.049	0.045	0.041	0.027	0.013
AMS4444	0.964	0.087	0.108	0.099	0.098	0.077	0.091	0.083	0.07	0.04	0.024
AMS4444	1.009	0.105	0.102	0.095	0.097	0.083	0.094	0.086	0.064	0.037	0.018
AMS4444	1.031	0.115	0.105	0.087	0.098	0.094	0.074	0.081	0.073	0.049	0.022
P75063	1.053	0.063	0.07	0.065	0.063	0.061	0.061	0.065	0.068	0.063	0.048
P75063	1.044	0.071	0.082	0.061	0.06	0.059	0.056	0.061	0.059	0.062	0.045
P75063	1.02	0.058	0.056	0.054	0.057	0.05	0.058	0.056	0.055	0.056	0.044
ANS4104	0.762	0.041	0.038	0.032	0.033	0.032	0.032	0.032	0.033	0.035	0.026
AMS4104	0.802	0.037	0.03	0.028	0.03	0.039	0.027	0.033	0.034	0.036	0.023
AMS4104	0.937	0.045	0.034	0.04	0.036	0.024	0.033	0.033	0.037	0.039	0.025
AMS4105	0.909	0.256	0.269	0.228	0.246	0.245	0.232	0.207	0.193	0.163	0.129
AMS4105	0.895	0.859	0.94	0.432	0.262	0.232	0.228	0.221	0.251	0.221	0.206
AMS4106	1.068	1.099	0.98	0.366	0.111	0.089	0.07	0.06	0.064	0.054	0.053
AMS4106	1.002	0.081	0.065	0.064	0.069	0.062	0.062	0.062	0.065	0.067	0.061
AMS4107	1.043	0.095	0.088	0.081	0.084	0.086	0.086	0.085	0.088	0.086	0.072
AMS4107	0.939	0.549	0.233	0.124	0.101	0.086	0.082	0.082	0.081	0.084	0.076

## Sheet: Ketoconazole_48Hours
Figure 2 - Figure Supplement 1: Minimum inhibitory concentration raw data
						48 hours ketoconazole (ug/ml)
Isolate	No Drug	0.0078125	0.015625	0.03125	0.0625	0.125	0.25	0.5	1	2	4
SC5314	0.784	0.193	0.177	0.169	0.149	0.144	0.141	0.148	0.144	0.161	0.112
SC5314	0.996	0.203	0.183	0.159	0.151	0.159	0.151	0.157	0.159	0.171	0.142
SC5314	1.056	0.033	0.034	0.037	0.024	0.042	0.026	0.033	0.036	0.035	0.019
AMS4702	0.872	0.095	0.108	0.05	0.082	0.075	0.079	0.066	0.097	0.108	0.104
AMS4702	0.914	0.164	0.141	0.126	0.167	0.143	0.132	0.126	0.154	0.186	0.179
AMS4702	0.888	0.2	0.182	0.18	0.147	0.149	0.129	0.131	0.147	0.147	0.163
P75016	0.996	0.037	0.02	0.011	0.017	0.014	0.014	0.019	0.019	0.012	0.016
P75016	0.911	0.023	0.014	0.027	0.015	0.024	0.016	0.021	0.016	0.029	0.012
P75016	0.956	0.03	0.026	0.015	0.016	0.027	0.011	0.01	0.017	0.027	0.013
AMS4397	0.819	0.048	0.032	0.036	0.041	0.067	0.058	0.11	0.131	0.141	0.085
AMS4397	0.797	0.06	0.04	0.05	0.035	0.05	0.042	0.075	0.123	0.119	0.077
AMS4397	0.84	0.047	0.051	0.066	0.047	0.057	0.073	0.095	0.117	0.134	0.068
P78042	1.027	0.144	0.138	0.143	0.135	0.123	0.134	0.122	0.112	0.071	0.046
P78042	0.989	0.136	0.125	0.123	0.13	0.129	0.119	0.124	0.092	0.073	0.033
P78042	1.003	0.138	0.138	0.135	0.126	0.139	0.14	0.116	0.09	0.074	0.043
AMS4444	0.939	0.436	0.424	0.412	0.349	0.372	0.359	0.304	0.236	0.17	0.084
AMS4444	0.899	0.404	0.353	0.341	0.37	0.358	0.314	0.325	0.256	0.147	0.077
AMS4444	0.923	0.426	0.38	0.375	0.379	0.348	0.325	0.281	0.247	0.144	0.084
P75063	0.969	0.21	0.163	0.141	0.144	0.118	0.126	0.128	0.132	0.135	0.126
P75063	0.974	0.243	0.177	0.157	0.147	0.12	0.118	0.111	0.125	0.135	0.132
P75063	0.962	0.162	0.153	0.146	0.131	0.136	0.128	0.13	0.128	0.148	0.144
ANS4104	0.845	0.162	0.142	0.121	0.119	0.109	0.106	0.097	0.097	0.101	0.092
AMS4104	0.862	0.183	0.138	0.116	0.114	0.099	0.096	0.103	0.122	0.1	0.081
AMS4104	0.913	0.195	0.157	0.149	0.128	0.103	0.106	0.116	0.122	0.114	0.073
AMS4105	0.908	0.749	0.676	0.633	0.59	0.596	0.57	0.519	0.458	0.392	0.308
AMS4105	0.927	0.684	0.597	0.548	0.473	0.472	0.473	0.421	0.383	0.413	0.315
AMS4105	0.882	0.625	0.596	0.561	0.536	0.544	0.492	0.481	0.448	0.423	0.366
AMS4106	1.093	0.154	0.101	0.097	0.074	0.101	0.075	0.091	0.055	0.069	0.07
AMS4106	1.134	0.193	0.12	0.084	0.079	0.075	0.068	0.055	0.061	0.073	0.072
AMS4106	1.137	0.139	0.093	0.086	0.073	0.078	0.074	0.082	0.085	0.091	0.083
AMS4107	1.084	0.179	0.15	0.142	0.144	0.137	0.136	0.131	0.135	0.13	0.122
AMS4107	0.989	0.404	0.283	0.239	0.205	0.218	0.207	0.18	0.172	0.184	0.154
AMS4107	0.79	0.237	0.263	0.251	0.267	0.229	0.223	0.208	0.227	0.225	0.199

## Sheet: Posaconazole_24Hours
Figure 2 - Figure Supplement 1: Minimum inhibitory concentration raw data
						24 hours posaconazole (ug/ml)
Isolate	No Drug	0.0078125	0.015625	0.03125	0.0625	0.125	0.25	0.5	1	2	4
SC5314	0.944	0.057	0.049	0.039	0.039	0.036	0.043	0.043	0.034	0.045	0.019
SC5314	0.915	0.035	0.035	0.034	0.031	0.026	0.029	0.029	0.029	0.031	0.032
SC5314	0.88	0.019	0.016	0.016	0.016	0.016	0.017	0.016	0.023	0.027	0.022
AMS4702	0.944	0.03	0.02	0.025	0.016	0.019	0.022	0.024	0.034	0.025	0.02
AMS4702	0.93	0.019	0.02	0.018	0.019	0.015	0.016	0.017	0.021	0.03	0.022
AMS4702	0.869	0.024	0.019	0.019	0.015	0.015	0.015	0.021	0.025	0.019	0.026
P75016	0.946	0.016	0.007	0.01	0.01	0.01	0.01	0.011	0.012	0.02	0.015
P75016	0.946	0.023	0.013	0.013	0.012	0.012	0.01	0.016	0.01	0.013	0.009
P75016	0.942	0.027	0.012	0.015	0.012	0.014	0.012	0.013	0.011	0.012	0.01
AMS4397	0.398	0.049	0.066	0.043	0.034	0.047	0.06	0.034	0.038	0.073	0.039
AMS4397	0.459	0.063	0.042	0.045	0.04	0.042	0.036	0.043	0.031	0.047	0.03
AMS4397	0.399	0.05	0.041	0.036	0.039	0.036	0.032	0.036	0.015	0.043	0.023
P78042	0.893	0.071	0.077	0.072	0.069	0.074	0.072	0.071	0.059	0.082	0.087
P78042	0.864	0.065	0.061	0.077	0.065	0.065	0.075	0.073	0.077	0.091	0.069
P78042	0.919	0.072	0.083	0.062	0.059	0.071	0.093	0.063	0.078	0.088	0.079
AMS4444	0.587	0.092	0.092	0.09	0.105	0.097	0.081	0.1	0.082	0.041	0.059
AMS4444	0.593	0.11	0.097	0.096	0.082	0.09	0.06	0.059	0.094	0.06	0.042
AMS4444	0.605	0.133	0.104	0.114	0.091	0.093	0.086	0.096	0.108	0.03	0.035
P75063	1.028	0.063	0.051	0.061	0.055	0.049	0.052	0.052	0.053	0.071	0.05
P75063	0.989	0.06	0.054	0.053	0.051	0.052	0.05	0.044	0.04	0.053	0.041
P75063	0.918	0.053	0.036	0.049	0.037	0.037	0.016	0.022	0.018	0.03	0.031
ANS4104	0.896	0.049	0.037	0.04	0.038	0.039	0.036	0.04	0.031	0.022	0.027
AMS4104	0.806	0.052	0.047	0.037	0.032	0.033	0.044	0.038	0.023	0.026	0.019
AMS4104	0.825	0.052	0.037	0.044	0.049	0.041	0.038	0.04	0.034	0.031	0.026
AMS4105	0.927	0.19	0.17	0.169	0.186	0.162	0.169	0.155	0.133	0.134	0.115
AMS4105	0.898	0.191	0.143	0.154	0.158	0.158	0.204	0.142	0.14	0.178	0.126
AMS4106	0.984	0.037	0.028	0.025	0.018	0.019	0.018	0.012	0.017	0.013	0.006
AMS4106	0.946	0.047	0.03	0.027	0.027	0.021	0.028	0.022	0.023	0.017	0.016
AMS4107	0.899	0.06	0.054	0.069	0.046	0.044	0.057	0.054	0.043	0.093	0.03
AMS4107	0.916	0.05	0.058	0.045	0.066	0.062	0.049	0.047	0.109	0.033	0.032

## Sheet: Posaconazole_48Hours
Figure 2 - Figure Supplement 1: Minimum inhibitory concentration raw data
						48 hours posaconazole (ug/ml)
Isolate	No Drug	0.0078125	0.015625	0.03125	0.0625	0.125	0.25	0.5	1	2	4
SC5314	0.913	0.145	0.109	0.076	0.093	0.08	0.082	0.084	0.087	0.087	0.134
SC5314	1.035	0.171	0.108	0.106	0.071	0.087	0.065	0.08	0.074	0.073	0.097
SC5314	1.086	0.142	0.071	0.071	0.099	0.075	0.082	0.092	0.087	0.102	0.128
AMS4702	0.813	0.221	0.179	0.132	0.113	0.094	0.083	0.102	0.097	0.098	0.127
AMS4702	1.008	0.342	0.175	0.164	0.12	0.104	0.071	0.065	0.092	0.094	0.101
AMS4702	1.123	0.114	0.096	0.094	0.087	0.073	0.084	0.091	0.085	0.097	0.142
P75016	0.972	0.272	0.169	0.094	0.046	0.041	0.046	0.061	0.027	0.021	0.026
P75016	1.038	0.229	0.123	0.084	0.045	0.036	0.044	0.034	0.019	0.03	0.026
P75016	1.184	0.138	0.036	0.036	0.035	0.043	0.061	0.043	0.039	0.042	0.026
AMS4397	0.848	0.472	0.428	0.347	0.291	0.246	0.21	0.252	0.227	0.196	0.12
AMS4397	0.892	0.536	0.408	0.351	0.31	0.256	0.228	0.226	0.182	0.187	0.142
AMS4397	0.933	0.484	0.37	0.324	0.254	0.265	0.28	0.243	0.322	0.283	0.147
P78042	1.069	0.273	0.266	0.246	0.258	0.271	0.242	0.23	0.237	0.205	0.237
P78042	1.099	0.279	0.259	0.284	0.254	0.256	0.229	0.238	0.197	0.204	0.188
P78042	1.222	0.315	0.275	0.256	0.266	0.261	0.245	0.241	0.245	0.219	0.215
AMS4444	0.995	0.558	0.527	0.501	0.54	0.527	0.484	0.479	0.457	0.354	0.406
AMS4444	0.926	0.54	0.527	0.712	0.529	0.462	0.504	0.702	0.421	0.466	0.316
AMS4444	1.081	0.585	0.54	0.529	0.526	0.615	0.538	0.542	0.518	0.55	0.427
P75063	1.127	0.242	0.188	0.166	0.153	0.131	0.13	0.133	0.123	0.116	0.129
P75063	1.13	0.281	0.178	0.176	0.158	0.154	0.132	0.128	0.115	0.139	0.131
P75063	1.052	0.288	0.213	0.183	0.154	0.158	0.158	0.151	0.159	0.148	0.154
ANS4104	1.084	0.248	0.193	0.171	0.183	0.166	0.143	0.134	0.125	0.097	0.102
AMS4104	1.01	0.238	0.205	0.211	0.174	0.171	0.161	0.13	0.133	0.103	0.094
AMS4104	0.98	0.297	0.223	0.195	0.175	0.168	0.171	0.162	0.148	0.143	0.134
AMS4105	0.944	0.71	0.642	0.61	0.583	0.572	0.554	0.51	0.472	0.455	0.338
AMS4105	0.909	0.692	0.656	0.61	0.592	0.575	0.553	0.53	0.482	0.439	0.367
AMS4105	0.717	0.941	0.707	0.667	0.69	0.656	0.646	0.6	0.533	0.48	0.378
AMS4106	1.136	0.176	0.096	0.082	0.07	0.064	0.055	0.051	0.055	0.055	0.043
AMS4106	1.154	0.22	0.109	0.086	0.076	0.061	0.062	0.067	0.065	0.059	0.053
AMS4106	1.06	0.327	0.111	0.066	0.061	0.056	0.048	0.043	0.042	0.045	0.043
AMS4107	1.098	0.262	0.233	0.234	0.256	0.232	0.224	0.19	0.189	0.185	0.118
AMS4107	1.037	0.308	0.251	0.262	0.24	0.232	0.219	0.224	0.24	0.229	0.131
AMS4107	0.977	0.302	0.161	0.155	0.14	0.148	0.138	0.133	0.138	0.141	0.141
