# Supplementary material for: Expandable and reversible copy number amplification drives rapid adaptation to antifungal drugs
Source: eLife. 2020 Jul 20;9:e58349. doi: 10.7554/eLife.58349 (PMC7371428; doi:10.7554/eLife.58349)
Supplement: Supplementary file 1. [file elife-58349-supp1.xlsx]

## Sheet: Sheet1
Supplementary file 1: Strains used in this study
Strain Name	Progenitor	Ploidy	Isolation Source	SRR	Reference
SC5314		2N	Clinical isolate	SRR868699	Hirakawa et al., 2015
P78042		2N	Clinical isolate	SRR543724	Hirakawa et al., 2015
P75016		2N	Clinical isolate	SRR543721	Hirakawa et al., 2015
P75063		2N	Clinical isolate	SRR543727	Hirakawa et al., 2015
AMS4107	P75063	2N	in vitro evolution	SRR11347407	This Study
AMS4105	P75063	2N	in vitro evolution	SRR11347409	This Study
AMS4397	P75016	2N	in vitro evolution	SRR11347414	This Study
AMS4104	P75063	2N	in vitro evolution	SRR11347410	This Study
AMS4106	P75063	2N	in vitro evolution	SRR11347408	This Study
AMS4444	P78042	2N	in vitro evolution	SRR11347413	This Study
AMS4702	SC5314	2N	in vitro evolution	SRR12169216	This Study
AMS3050	CaCi-17	2N	in vitro evolution	SRR3593469	Mount et al., 2018
AMS3051 (MinION)	AMS3050	2N	in vitro evolution	SRR11347406	This Study
AMS3051	AMS3050	2N	in vitro evolution	SRR3593470	Mount et al., 2018
AMS3052	AMS3050	2N	in vitro evolution	SRR3593471	Mount et al., 2018
AMS3053	AMS3050	2N	in vitro evolution	SRR3593474	Mount et al., 2018
AMS3054	AMS3050	2N	in vitro evolution	SRR3593476	Mount et al., 2018
AMS3092	AMS3051	2N	in vitro evolution	SRR11347412	This Study
AMS3093	AMS3051	2N	in vitro evolution	SRR11347411	This Study
AMS3094	AMS3051	2N	in vitro evolution	SRR6941758	Mount et al., 2018
AMS3053_A	AMS3053	2N	in vitro evolution	NA	This Study
AMS3053_B	AMS3053	2N	in vitro evolution	NA	This Study
AMS3053_C	AMS3053	2N	in vitro evolution	NA	This Study
AMS3053_D	AMS3053	2N	in vitro evolution	NA	This Study
AMS3053_E	AMS3053	2N	in vitro evolution	NA	This Study
AMS3053_F	AMS3053	2N	in vitro evolution	NA	This Study
AMS3053_G	AMS3053	2N	in vitro evolution	NA	This Study
AMS3053_H	AMS3053	2N	in vitro evolution	NA	This Study
