# Supplementary material for: Expandable and reversible copy number amplification drives rapid adaptation to antifungal drugs
Source: eLife. 2020 Jul 20;9:e58349. doi: 10.7554/eLife.58349 (PMC7371428; doi:10.7554/eLife.58349)
Supplement: Supplementary file 2. [file elife-58349-supp2.xlsx]

## Sheet: Sheet1
Supplementary file 2: Features of Long Repeat Sequences Identified at Copy Number Breakpoints of Complex CNVs
Strain	INTRA- or INTER- Chromosomal	Repeat Family Number	General Feature Present	Copies per Genome	Chromosome Sequence 1	Start Sequence 1	End Sequence 1	Chromosome Sequence 2	Start Sequence 2	End Sequence 2	Copy Length Sequence 1	Copy Length Sequence 2	Spacer Length	Shared Identity	Gene Features in Sequence 1	Gene Features in Sequence 2	ORF Occupancy Sequence 1	ORF Occupancy Sequence 2
AMS4107	INTRA	57	ORF	2	1	2117999	2118807	1	2168519	2167711	809	809	48904	88.4	Uncharacterized orf19.4824	Uncharacterized orf19.4857	Single ORF	Single ORF
AMS4107	INTRA	57	ORF	2	1	2167711	2168519	1	2118807	2117999	809	809	50520	88	Uncharacterized orf19.4857	Uncharacterized orf19.4824	Single ORF	Single ORF
AMS4107	INTRA	58	ORF	2	1	2271519	2274379	1	2335801	2332942	2861	2860	58563	96.47	Characterized orf19.4899 (GCA1)	Characterized orf19.1999 (GCA2)	Single ORF	Single ORF
AMS4107	INTRA	58	ORF	2	1	2332942	2335801	1	2274379	2271519	2860	2861	64282	96.47	Characterized orf19.1999 (GCA2)	Characterized orf19.4899 (GCA1)	Single ORF	Single ORF
AMS4105	INTRA	57	ORF	2	1	2117999	2118807	1	2168519	2167711	809	809	48904	88.4	Uncharacterized orf19.4824	Uncharacterized orf19.4857	Single ORF	Single ORF
AMS4105	INTRA	57	ORF	2	1	2167711	2168519	1	2118807	2117999	809	809	50520	88.4	Uncharacterized orf19.4857	Uncharacterized orf19.4824	Single ORF	Single ORF
AMS4105	INTRA	58	ORF	2	1	2271519	2274379	1	2335801	2332942	2861	2860	58563	96.47	Characterized orf19.4899 (GCA1)	Characterized orf19.1999 (GCA2)	Single ORF	Single ORF
AMS4105	INTRA	58	ORF	2	1	2332942	2335801	1	2274379	2271519	2860	2861	64282	96.47	Characterized orf19.1999 (GCA2)	Characterized orf19.4899 (GCA1)	Single ORF	Single ORF
AMS4105	INTRA	70	ORF	2	1	3113842	3114951	1	3134233	3133121	1110	1113	18170	84.04	Characterized orf19.7219 (FTR1)	Characterized orf19.7231 (FTR2)	Single ORF	Single ORF
AMS4105	INTRA	70	ORF	2	1	3133121	3134233	1	3114951	3113842	1113	1110	20391	84.04	Characterized orf19.7231 (FTR2)	Characterized orf19.7219 (FTR1)	Single ORF	Single ORF
AMS4105	INTRA	133	ORF	2	3	1050245	1052178	3	1148409	1150342	1934	1934	96231	92.41	Characterized orf19.5958 (CDR2)	Characterized orf19.6000 (CDR1)	Portion	Portion
AMS4105	INTRA	133	ORF	2	3	1148409	1150342	3	1050245	1052178	1934	1934	100097	92.41	Characterized orf19.6000 (CDR1)	Characterized orf19.5958 (CDR2)	Portion	Portion
AMS4105	INTRA	134	ORF	2	3	1300371	1301644	3	1308425	1307131	1274	1295	5487	81.57	Characterized orf19.7362 (SKN1)	Characterized orf19.7363 (KRE6)	Portion	Portion
AMS4105	INTRA	134	ORF	2	3	1307131	1308425	3	1301644	1300371	1295	1274	8054	81.57	Characterized orf19.7363 (KRE6)	Characterized orf19.7362 (SKN1)	Portion	Portion
AMS4105	INTRA	136	ORF	3	3	1402380	1404161	3	1457911	1456130	1782	1782	51969	99.83	Part of Uncharacterized orf19.7397, Uncharacterized orf19.7397.1, Large Intergenic Region	Uncharacterized orf19.7398, orf19.7424 (NSA2), Part of Uncharacterized orf19.7422	Multi ORF	Multi ORF
AMS4105	INTRA	136	ORF	3	3	1404221	1407250	3	1454881	1451848	3030	3034	44598	99.7	Uncharacterized orf19.7397.3, orf19.7417 (TSA1)	Part ofUncharacterized orf19.7422, orf19.7421 (CYP5), Uncharacterized orf19.7420, orf19.7419 (HNT2), orf19.7398.1 (TSA1B)	Multi ORF	Multi ORF
AMS4105	INTRA	136	ORF	3	3	1451848	1454881	3	1407250	1404221	3034	3030	50660	99.7	Part ofUncharacterized orf19.7422, orf19.7421 (CYP5), Uncharacterized orf19.7420, orf19.7419 (HNT2), orf19.7398.1 (TSA1B)	Uncharacterized or19.7397.3, orf19.7417 (TSA1)	Multi ORF	Multi ORF
AMS4105	INTRA	136	ORF	3	3	1456130	1457911	3	1404161	1402380	1782	1782	55531	99.83	Uncharacterized orf19.7398, orf19.7424 (NSA2), Part of Uncharacterized orf19.7422	Part of Uncharacterized orf19.7397, Uncharacterized orf19.7397.1, Large Intergenic Region	Multi ORF	Multi ORF
AMS4397	INTRA	133	ORF	2	3	1050245	1052178	3	1148409	1150342	1934	1934	96231	92.41	Characterized orf19.5958 (CDR2)	Characterized orf19.6000 (CDR1)	Portion	Portion
AMS4397	INTRA	133	ORF	2	3	1148409	1150342	3	1050245	1052178	1934	1934	100097	92.41	Characterized orf19.6000 (CDR1)	Characterized orf19.5958 (CDR2)	Portion	Portion
AMS4397	INTRA	134	ORF	2	3	1300371	1301644	3	1308425	1307131	1274	1295	5487	81.57	Characterized orf19.7362 (SKN1)	Characterized orf19.7363 (KRE6)	Portion	Portion
AMS4397	INTRA	134	ORF	2	3	1307131	1308425	3	1301644	1300371	1295	1274	8054	81.57	Characterized orf19.7363 (KRE6)	Characterized orf19.7362 (SKN1)	Portion	Portion
AMS4397	INTRA	136	ORF	3	3	1402380	1404161	3	1457911	1456130	1782	1782	51969	99.83	Part of Uncharacterized orf19.7397, Uncharacterized orf19.7397.1, Large Intergenic Region	Uncharacterized orf19.7398, orf19.7424 (NSA2), Part of Uncharacterized orf19.7422	Multi ORF	Multi ORF
AMS4397	INTRA	136	ORF	3	3	1404221	1407250	3	1454881	1451848	3030	3034	44598	99.7	Uncharacterized orf19.7397.3, orf19.7417 (TSA1)	Part ofUncharacterized orf19.7422, orf19.7421 (CYP5), Uncharacterized orf19.7420, orf19.7419 (HNT2), orf19.7398.1 (TSA1B)	Multi ORF	Multi ORF
AMS4397	INTRA	136	ORF	3	3	1451848	1454881	3	1407250	1404221	3034	3030	50660	99.7	Part ofUncharacterized orf19.7422, orf19.7421 (CYP5), Uncharacterized orf19.7420, orf19.7419 (HNT2), orf19.7398.1 (TSA1B)	Uncharacterized or19.7397.3, orf19.7417 (TSA1)	Multi ORF	Multi ORF
AMS4397	INTRA	136	ORF	3	3	1456130	1457911	3	1404161	1402380	1782	1782	55531	99.83	Uncharacterized orf19.7398, orf19.7424 (NSA2), Part of Uncharacterized orf19.7422	Part of Uncharacterized orf19.7397, Uncharacterized orf19.7397.1, Large Intergenic Region	Multi ORF	Multi ORF
AMS4104	INTRA	134	ORF	2	3	1300371	1301644	3	1308425	1307131	1274	1295	5487	81.57	Characterized orf19.7362 (SKN1)	Characterized orf19.7363 (KRE6)	Portion	Portion
AMS4104	INTRA	134	ORF	2	3	1307131	1308425	3	1301644	1300371	1295	1274	8054	81.57	Characterized orf19.7363 (KRE6)	Characterized orf19.7362 (SKN1)	Portion	Portion
AMS4104	INTRA	136	ORF	3	3	1402380	1404161	3	1457911	1456130	1782	1782	51969	99.83	Part of Uncharacterized orf19.7397, Uncharacterized orf19.7397.1, Large Intergenic Region	Uncharacterized orf19.7398, orf19.7424 (NSA2), Part of Uncharacterized orf19.7422	Multi ORF	Multi ORF
AMS4104	INTRA	136	ORF	3	3	1404221	1407250	3	1454881	1451848	3030	3034	44598	99.7	Uncharacterized orf19.7397.3, orf19.7417 (TSA1)	Part ofUncharacterized orf19.7422, orf19.7421 (CYP5), Uncharacterized orf19.7420, orf19.7419 (HNT2), orf19.7398.1 (TSA1B)	Multi ORF	Multi ORF
AMS4104	INTRA	136	ORF	3	3	1451848	1454881	3	1407250	1404221	3034	3030	50660	99.7	Part ofUncharacterized orf19.7422, orf19.7421 (CYP5), Uncharacterized orf19.7420, orf19.7419 (HNT2), orf19.7398.1 (TSA1B)	Uncharacterized or19.7397.3, orf19.7417 (TSA1)	Multi ORF	Multi ORF
AMS4104	INTRA	136	ORF	3	3	1456130	1457911	3	1404161	1402380	1782	1782	55531	99.83	Uncharacterized orf19.7398, orf19.7424 (NSA2), Part of Uncharacterized orf19.7422	Part of Uncharacterized orf19.7397, Uncharacterized orf19.7397.1, Large Intergenic Region	Multi ORF	Multi ORF
AMS4106	INTRA	146	ORF	2	4	531791	534363	4	555788	553212	2573	2577	18849	97.28	Uncharacterized orf19.2743, Uncharacterized orf19.2742	Uncharacterized orf19.2730, Uncharacterized orf19.2731	Multi ORF	Multi ORF
AMS4106	INTRA	146	ORF	2	4	553212	555788	4	534363	531791	2577	2573	23997	97.28	Uncharacterized orf19.2730, Uncharacterized orf19.2731	Uncharacterized orf19.2743, Uncharacterized orf19.2742	Multi ORF	Multi ORF
AMS4106	INTRA	148	ORF	2	4	671261	672786	4	704243	702718	1526	1526	29932	95.74	Uncharacterized orf19.2671	Uncharacterized orf19.3362
AMS4106	INTRA	148	ORF	2	4	702718	704243	4	672786	671261	1526	1526	32982	95.74	Uncharacterized orf19.3362	Uncharacterized orf19.2671	Single ORF	Single ORF
AMS4444	INTRA	146	ORF	2	4	531791	534363	4	555788	553212	2573	2577	18849	97.28	Uncharacterized orf19.2743, Uncharacterized orf19.2742	Uncharacterized orf19.2730, Uncharacterized orf19.2731	Multi ORF	Multi ORF
AMS4444	INTRA	146	ORF	2	4	553212	555788	4	534363	531791	2577	2573	23997	97.28	Uncharacterized orf19.2730, Uncharacterized orf19.2731	Uncharacterized orf19.2743, Uncharacterized orf19.2742	Multi ORF	Multi ORF
AMS4444	INTRA	95	tRNA	6	4	781034	781119	4	782813	782728	86	86	1609	97.7	tRNA (GUC)	tRNA (GUC)
AMS4444	INTRA	95	tRNA	6	4	782728	782813	4	781119	781034	86	86	1779	97.7	tRNA (GUC)	tRNA (GUC)
AMS4702	INTRA	148	ORF	2	4	671261	672786	4	704243	702718	1526	1526	29932	95.74	Uncharacterized orf19.2671	Uncharacterized orf19.3362
AMS4702	INTRA	148	ORF	2	4	702718	704243	4	672786	671261	1526	1526	32982	95.74	Uncharacterized orf19.3362	Uncharacterized orf19.2671	Single ORF	Single ORF
AMS4702	INTRA	234	RB	2	4	851316	852816	4	898244	899744	1500	1500	46928	97.7	RB2-41	ORF19.1430
AMS4702	INTRA	234	ORF	2	4	898244	899744	4	851316	852816	1500	1500	48428	97.7	ORF19.1430	RB2-41
AMS3051	INTRA	124	ORF	2	3	621732	624946	3	639446	636234	3215	3213	11288	99.53	Uncharacterized orf19.279, Uncharacterized orf19.280, Uncharacterized orf19.281, Uncharacterized orf19.284	orf19.297 (DTD2), Uncharacterized orf19.296, Uncharacterized orf19.295, Uncharacterized orf19.292	Multi ORF	Multi ORF
AMS3051	INTRA	124	ORF	2	3	636234	639446	3	624946	621732	3213	3215	17714	99.53	orf19.297 (DTD2), Uncharacterized orf19.296, Uncharacterized orf19.295, Uncharacterized orf19.292	Uncahracterized orf19.279, Uncharacterized orf19.280, Uncharacterized orf19.281, Uncharacterized orf19.284	Multi ORF	Multi ORF
AMS3051	INTRA	127	ORF	2	3	665300	669412	3	767893	763780	4113	4114	94368	99.13	Uncharacterized orf19.310, orf19.313 (DAL4)	orf19.6958 (ECM18), Uncharacterized orf19.6957, orf19.360 (FUR4)	Multi ORF	Multi ORF
AMS3051	INTRA	127	ORF	2	3	763780	767893	3	669412	665300	4114	4113	102593	99.13	orf19.6958 (ECM18), Uncharacterized orf19.6957, orf19.360 (FUR4)	Uncharacterized orf19.310, orf19.313 (DAL4)	Multi ORF	Multi ORF
AMS3052	INTRA	124	ORF	2	3	621732	624946	3	639446	636234	3215	3213	11288	99.53	Uncharacterized orf19.279, Uncharacterized orf19.280, Uncharacterized orf19.281, Uncharacterized orf19.284	orf19.297 (DTD2), Uncharacterized orf19.296, Uncharacterized orf19.295, Uncharacterized orf19.292	Multi ORF	Multi ORF
AMS3052	INTRA	124	ORF	2	3	636234	639446	3	624946	621732	3213	3215	17714	99.53	orf19.297 (DTD2), Uncharacterized orf19.296, Uncharacterized orf19.295, Uncharacterized orf19.292	Uncahracterized orf19.279, Uncharacterized orf19.280, Uncharacterized orf19.281, Uncharacterized orf19.284	Multi ORF	Multi ORF
AMS3053	INTRA	124	ORF	2	3	621732	624946	3	639446	636234	3215	3213	11288	99.53	Uncharacterized orf19.279, Uncharacterized orf19.280, Uncharacterized orf19.281, Uncharacterized orf19.284	orf19.297 (DTD2), Uncharacterized orf19.296, Uncharacterized orf19.295, Uncharacterized orf19.292	Multi ORF	Multi ORF
AMS3053	INTRA	124	ORF	2	3	636234	639446	3	624946	621732	3213	3215	17714	99.53	orf19.297 (DTD2), Uncharacterized orf19.296, Uncharacterized orf19.295, Uncharacterized orf19.292	Uncahracterized orf19.279, Uncharacterized orf19.280, Uncharacterized orf19.281, Uncharacterized orf19.284	Multi ORF	Multi ORF
AMS3054	INTRA	124	ORF	2	3	621732	624946	3	639446	636234	3215	3213	11288	99.53	Uncharacterized orf19.279, Uncharacterized orf19.280, Uncharacterized orf19.281, Uncharacterized orf19.284	orf19.297 (DTD2), Uncharacterized orf19.296, Uncharacterized orf19.295, Uncharacterized orf19.292	Multi ORF	Multi ORF
AMS3054	INTRA	124	ORF	2	3	636234	639446	3	624946	621732	3213	3215	17714	99.53	orf19.297 (DTD2), Uncharacterized orf19.296, Uncharacterized orf19.295, Uncharacterized orf19.292	Uncahracterized orf19.279, Uncharacterized orf19.280, Uncharacterized orf19.281, Uncharacterized orf19.284	Multi ORF	Multi ORF
AMS3054	INTRA	127	ORF	2	3	665300	669412	3	767893	763780	4113	4114	94368	99.13	Uncharacterized orf19.310, orf19.313 (DAL4)	orf19.6958 (ECM18), Uncharacterized orf19.6957, orf19.360 (FUR4)	Multi ORF	Multi ORF
AMS3054	INTRA	127	ORF	2	3	763780	767893	3	669412	665300	4114	4113	102593	99.13	orf19.6958 (ECM18), Uncharacterized orf19.6957, orf19.360 (FUR4)	Uncharacterized orf19.310, orf19.313 (DAL4)	Multi ORF	Multi ORF
AMS3094	INTRA	124	ORF	2	3	621732	624946	3	639446	636234	3215	3213	11288	99.53	Uncharacterized orf19.279, Uncharacterized orf19.280, Uncharacterized orf19.281, Uncharacterized orf19.284	orf19.297 (DTD2), Uncharacterized orf19.296, Uncharacterized orf19.295, Uncharacterized orf19.292	Multi ORF	Multi ORF
AMS3094	INTRA	124	ORF	2	3	636234	639446	3	624946	621732	3213	3215	17714	99.53	orf19.297 (DTD2), Uncharacterized orf19.296, Uncharacterized orf19.295, Uncharacterized orf19.292	Uncahracterized orf19.279, Uncharacterized orf19.280, Uncharacterized orf19.281, Uncharacterized orf19.284	Multi ORF	Multi ORF
AMS3094	INTRA	127	ORF	2	3	665300	669412	3	767893	763780	4113	4114	94368	99.13	Uncharacterized orf19.310, orf19.313 (DAL4)	orf19.6958 (ECM18), Uncharacterized orf19.6957, orf19.360 (FUR4)	Multi ORF	Multi ORF
AMS3094	INTRA	127	ORF	2	3	763780	767893	3	669412	665300	4114	4113	102593	99.13	orf19.6958 (ECM18), Uncharacterized orf19.6957, orf19.360 (FUR4)	Uncharacterized orf19.310, orf19.313 (DAL4)	Multi ORF	Multi ORF
AMS3092	INTRA	124	ORF	2	3	621732	624946	3	639446	636234	3215	3213	11288	99.53	Uncharacterized orf19.279, Uncharacterized orf19.280, Uncharacterized orf19.281, Uncharacterized orf19.284	orf19.297 (DTD2), Uncharacterized orf19.296, Uncharacterized orf19.295, Uncharacterized orf19.292	Multi ORF	Multi ORF
AMS3092	INTRA	124	ORF	2	3	636234	639446	3	624946	621732	3213	3215	17714	99.53	orf19.297 (DTD2), Uncharacterized orf19.296, Uncharacterized orf19.295, Uncharacterized orf19.292	Uncahracterized orf19.279, Uncharacterized orf19.280, Uncharacterized orf19.281, Uncharacterized orf19.284	Multi ORF	Multi ORF
AMS3092	INTRA	127	ORF	2	3	665300	669412	3	767893	763780	4113	4114	94368	99.13	Uncharacterized orf19.310, orf19.313 (DAL4)	orf19.6958 (ECM18), Uncharacterized orf19.6957, orf19.360 (FUR4)	Multi ORF	Multi ORF
AMS3092	INTRA	127	ORF	2	3	763780	767893	3	669412	665300	4114	4113	102593	99.13	orf19.6958 (ECM18), Uncharacterized orf19.6957, orf19.360 (FUR4)	Uncharacterized orf19.310, orf19.313 (DAL4)	Multi ORF	Multi ORF
