# Supplementary material for: Expandable and reversible copy number amplification drives rapid adaptation to antifungal drugs
Source: eLife. 2020 Jul 20;9:e58349. doi: 10.7554/eLife.58349 (PMC7371428; doi:10.7554/eLife.58349)
Supplement: Supplementary file 3. [file elife-58349-supp3.xlsx]

## Sheet: Growth Curve Ypad
Supplementary file 3: Growth curve raw data and analysis
Raw growth curve data in YPAD
Time	SC5314 Biol 1	SC5314 Biol 2	SC5314 Biol 3	AMS4702 Biol 1	AMS4702 Biol 2	AMS4702 Biol 3	P75016 Biol 1	P75016 Biol2	P75016 Biol 3	AMS4397 Biol 1	AMS4397 Biol 2	AMS4397 Biol 3	P75063 Biol 1	P75063 Biol 2	P75063 Biol 3	AMS4104 Biol 1	AMS4104 Biol 2	AMS4104 Biol 3	AMS4105 Biol 1	AMS4105 Biol 2	AMS4105 Biol 3	AMS4106 Biol 1	AMS4106 Biol 2	AMS4106 Biol 3	AMS4107 Biol 1	AMS4107 Biol 2	AMS4107 Biol 3	P78042 Biol 1	P78042 Biol 2	P78042 Biol 3	AMS4444 Biol 1	AMS4444 Biol 2	AMS4444 Biol 3
0.25	0.001	0.004	0.003	0.006	0.003	0	0.004	0.002	0.002	0.002	0.027	0.003	0.002	0.004	0.011	0	0.002	0.001	0.004	0.003	0.003	0.002	0.002	0.002	0.005	0.004	0.002	0.006	0.007	0.009	0.002	0.007	0.002
0.5	0.001	0.004	0.004	0.007	0.004	0.001	0.005	0.003	0.003	0.003	0.027	0.004	0.003	0.005	0.012	0	0.003	0.002	0.005	0.004	0.004	0.003	0.002	0.003	0.006	0.005	0.002	0.006	0.007	0.009	0.003	0.008	0.003
0.75	0	0.003	0.003	0.007	0.003	0	0.004	0.002	0.002	0.002	0.028	0.003	0.002	0.004	0.011	-0.001	0.002	0.001	0.004	0.003	0.003	0.002	0.002	0.002	0.005	0.004	0.002	0.006	0.007	0.009	0.002	0.007	0.003
1	0	0.002	0.003	0.006	0.003	-0.001	0.004	0.001	0.001	0.001	0.026	0.002	0.001	0.003	0.01	-0.001	0.002	0.001	0.004	0.002	0.002	0.002	0.001	0.001	0.005	0.003	0.001	0.006	0.007	0.009	0.001	0.006	0.002
1.25	0	0.003	0.003	0.006	0.003	0	0.004	0.001	0.002	0.001	0.026	0.002	0.001	0.003	0.011	-0.001	0.002	0.001	0.004	0.003	0.003	0.002	0.001	0.001	0.005	0.003	0.001	0.007	0.007	0.009	0.002	0.006	0.002
1.5	-0.001	0.002	0.002	0.006	0.002	-0.001	0.003	0.001	0.001	0.001	0.026	0.002	0.001	0.003	0.01	-0.001	0.002	0	0.003	0.002	0.002	0.002	0.001	0.001	0.005	0.003	0.001	0.006	0.007	0.009	0.001	0.006	0.002
1.75	-0.001	0.002	0.002	0.006	0.002	-0.001	0.004	0.001	0.001	0.001	0.025	0.002	0.001	0.003	0.01	-0.001	0.002	0	0.003	0.002	0.002	0.002	0.001	0.001	0.004	0.003	0.001	0.007	0.007	0.009	0.001	0.006	0.002
2	-0.001	0.002	0.002	0.006	0.002	-0.001	0.003	0.001	0.001	0.001	0.025	0.002	0.001	0.003	0.01	-0.001	0.002	0	0.003	0.002	0.002	0.002	0.001	0.001	0.004	0.003	0.001	0.007	0.007	0.009	0.001	0.006	0.001
2.25	-0.001	0.002	0.002	0.006	0.002	-0.001	0.004	0.001	0.001	0.001	0.025	0.002	0.001	0.003	0.01	-0.001	0.002	0	0.003	0.002	0.002	0.002	0.001	0.001	0.005	0.003	0.001	0.007	0.008	0.009	0.001	0.006	0.002
2.5	-0.001	0.002	0.002	0.006	0.002	-0.001	0.003	0.001	0.001	0.001	0.024	0.002	0.001	0.003	0.01	-0.001	0.001	0	0.003	0.002	0.002	0.002	0.001	0.001	0.005	0.003	0.001	0.007	0.008	0.009	0.001	0.006	0.001
2.75	-0.001	0.002	0.002	0.006	0.002	-0.001	0.004	0.001	0.001	0	0.027	0.002	0.001	0.003	0.01	-0.001	0.001	0	0.003	0.002	0.002	0.002	0.001	0.001	0.005	0.003	0.001	0.007	0.008	0.009	0.001	0.006	0.001
3	-0.001	0.002	0.002	0.006	0.003	-0.001	0.004	0.001	0.002	0.001	0.027	0.002	0.001	0.003	0.01	-0.001	0.002	0.001	0.003	0.002	0.003	0.002	0.002	0.001	0.005	0.003	0.001	0.007	0.008	0.009	0.001	0.006	0.002
3.25	-0.001	0.002	0.002	0.006	0.003	-0.001	0.004	0.001	0.002	0.001	0.027	0.002	0.001	0.003	0.01	-0.001	0.002	0.004	0.003	0.002	0.004	0.002	0.002	0.001	0.005	0.003	0.003	0.007	0.008	0.01	0.001	0.007	0.002
3.5	-0.001	0.002	0.003	0.006	0.004	-0.001	0.004	0.001	0.003	0.001	0.027	0.003	0.001	0.003	0.01	-0.001	0.002	0.007	0.004	0.002	0.006	0.002	0.002	0.003	0.005	0.004	0.004	0.007	0.008	0.01	0.001	0.007	0.004
3.75	0	0.003	0.003	0.007	0.007	0	0.005	0.002	0.005	0.002	0.028	0.006	0.003	0.004	0.011	0	0.003	0.01	0.004	0.003	0.009	0.003	0.004	0.006	0.006	0.005	0.007	0.007	0.008	0.01	0.002	0.008	0.007
4	0	0.002	0.003	0.006	0.01	0	0.005	0.002	0.006	0.001	0.028	0.008	0.002	0.003	0.011	-0.001	0.003	0.012	0.004	0.003	0.011	0.003	0.006	0.008	0.006	0.004	0.008	0.008	0.008	0.01	0.001	0.009	0.009
4.25	0	0.002	0.003	0.006	0.013	0	0.005	0.002	0.008	0.001	0.029	0.01	0.002	0.004	0.012	-0.001	0.005	0.014	0.004	0.003	0.013	0.003	0.01	0.01	0.006	0.005	0.01	0.008	0.008	0.01	0.001	0.013	0.012
4.5	0	0.003	0.003	0.006	0.016	0.001	0.005	0.003	0.01	0.001	0.032	0.012	0.002	0.004	0.013	-0.001	0.007	0.016	0.004	0.003	0.015	0.003	0.013	0.012	0.007	0.005	0.012	0.008	0.009	0.01	0.001	0.015	0.014
4.75	0	0.003	0.003	0.007	0.019	0.002	0.006	0.003	0.012	0.001	0.034	0.014	0.003	0.004	0.015	0	0.009	0.019	0.004	0.005	0.017	0.004	0.017	0.015	0.008	0.006	0.015	0.008	0.009	0.01	0.001	0.018	0.017
5	0.001	0.003	0.004	0.007	0.022	0.004	0.007	0.004	0.015	0.002	0.036	0.017	0.004	0.005	0.017	0	0.011	0.021	0.004	0.006	0.019	0.005	0.021	0.017	0.009	0.007	0.017	0.008	0.009	0.011	0.002	0.021	0.019
5.25	0.001	0.003	0.004	0.007	0.024	0.005	0.007	0.005	0.017	0.001	0.038	0.018	0.004	0.005	0.019	0	0.013	0.023	0.004	0.008	0.021	0.005	0.024	0.019	0.009	0.008	0.019	0.008	0.009	0.011	0.002	0.024	0.021
5.5	0.002	0.005	0.005	0.008	0.027	0.006	0.009	0.006	0.02	0.002	0.041	0.021	0.006	0.006	0.022	0.001	0.015	0.026	0.005	0.01	0.024	0.006	0.027	0.022	0.011	0.011	0.022	0.009	0.01	0.011	0.002	0.027	0.024
5.75	0.001	0.004	0.005	0.008	0.029	0.007	0.009	0.007	0.022	0.002	0.043	0.022	0.006	0.006	0.023	0	0.016	0.027	0.005	0.011	0.025	0.006	0.03	0.023	0.012	0.012	0.024	0.009	0.01	0.012	0.002	0.029	0.026
6	0.002	0.005	0.005	0.008	0.031	0.008	0.011	0.009	0.024	0.002	0.044	0.023	0.007	0.007	0.025	0	0.018	0.029	0.005	0.012	0.027	0.006	0.033	0.025	0.014	0.013	0.027	0.01	0.01	0.012	0.002	0.03	0.028
6.25	0.003	0.006	0.007	0.009	0.034	0.01	0.013	0.012	0.028	0.003	0.047	0.026	0.009	0.009	0.028	0.001	0.021	0.032	0.006	0.015	0.03	0.008	0.037	0.028	0.016	0.017	0.031	0.01	0.011	0.013	0.003	0.033	0.03
6.5	0.003	0.007	0.007	0.009	0.037	0.011	0.015	0.014	0.032	0.003	0.049	0.028	0.011	0.01	0.031	0.001	0.022	0.033	0.007	0.016	0.033	0.008	0.04	0.031	0.019	0.02	0.035	0.011	0.011	0.013	0.003	0.035	0.032
6.75	0.003	0.007	0.007	0.009	0.039	0.012	0.017	0.017	0.036	0.002	0.051	0.029	0.012	0.011	0.033	0	0.023	0.034	0.006	0.018	0.035	0.009	0.043	0.032	0.021	0.023	0.039	0.011	0.012	0.014	0.003	0.037	0.034
7	0.004	0.008	0.009	0.01	0.042	0.014	0.021	0.022	0.042	0.002	0.053	0.031	0.015	0.013	0.037	0.001	0.026	0.036	0.008	0.02	0.038	0.01	0.048	0.035	0.025	0.028	0.044	0.012	0.012	0.015	0.003	0.04	0.036
7.25	0.005	0.01	0.01	0.01	0.045	0.016	0.025	0.027	0.048	0.002	0.055	0.032	0.019	0.016	0.041	0.001	0.027	0.038	0.008	0.023	0.041	0.011	0.051	0.038	0.03	0.033	0.051	0.013	0.013	0.016	0.003	0.042	0.039
7.5	0.006	0.011	0.012	0.011	0.049	0.019	0.031	0.034	0.057	0.003	0.057	0.035	0.023	0.019	0.047	0.001	0.029	0.04	0.009	0.026	0.044	0.013	0.056	0.041	0.036	0.04	0.059	0.014	0.014	0.018	0.004	0.045	0.042
7.75	0.007	0.013	0.013	0.012	0.051	0.02	0.038	0.042	0.067	0.003	0.058	0.036	0.027	0.023	0.053	0.001	0.031	0.041	0.01	0.028	0.048	0.015	0.06	0.043	0.042	0.046	0.067	0.016	0.015	0.02	0.004	0.047	0.044
8	0.009	0.015	0.015	0.013	0.055	0.023	0.046	0.052	0.079	0.003	0.061	0.038	0.033	0.027	0.06	0.001	0.033	0.043	0.012	0.032	0.052	0.017	0.065	0.047	0.049	0.055	0.078	0.018	0.016	0.022	0.005	0.049	0.047
8.25	0.011	0.018	0.018	0.014	0.06	0.025	0.056	0.064	0.093	0.003	0.062	0.04	0.04	0.033	0.069	0.001	0.036	0.044	0.013	0.035	0.058	0.02	0.07	0.051	0.058	0.064	0.09	0.02	0.018	0.025	0.005	0.052	0.05
8.5	0.013	0.021	0.021	0.016	0.064	0.028	0.067	0.077	0.11	0.004	0.064	0.041	0.049	0.039	0.078	0.001	0.038	0.047	0.015	0.039	0.063	0.023	0.075	0.055	0.068	0.074	0.104	0.022	0.021	0.029	0.006	0.055	0.052
8.75	0.016	0.025	0.025	0.018	0.069	0.03	0.081	0.094	0.129	0.004	0.066	0.043	0.06	0.047	0.09	0.002	0.041	0.048	0.018	0.043	0.069	0.026	0.081	0.06	0.081	0.087	0.121	0.025	0.023	0.033	0.007	0.058	0.055
9	0.019	0.03	0.029	0.02	0.074	0.033	0.098	0.113	0.153	0.004	0.069	0.045	0.072	0.056	0.104	0.002	0.044	0.05	0.021	0.047	0.074	0.03	0.086	0.067	0.094	0.101	0.14	0.029	0.026	0.038	0.007	0.061	0.059
9.25	0.024	0.036	0.035	0.022	0.079	0.036	0.118	0.136	0.178	0.005	0.071	0.047	0.087	0.066	0.121	0.002	0.047	0.052	0.024	0.053	0.083	0.036	0.093	0.074	0.111	0.118	0.162	0.033	0.029	0.044	0.009	0.065	0.063
9.5	0.028	0.042	0.042	0.024	0.085	0.039	0.142	0.163	0.209	0.006	0.072	0.049	0.104	0.078	0.14	0.002	0.05	0.054	0.028	0.058	0.092	0.04	0.102	0.082	0.129	0.136	0.185	0.037	0.033	0.05	0.01	0.069	0.067
9.75	0.034	0.05	0.051	0.028	0.092	0.043	0.169	0.194	0.243	0.007	0.075	0.052	0.123	0.094	0.162	0.003	0.054	0.056	0.033	0.065	0.103	0.047	0.11	0.093	0.151	0.157	0.212	0.042	0.037	0.057	0.012	0.073	0.072
10	0.041	0.059	0.061	0.031	0.099	0.047	0.199	0.23	0.281	0.007	0.076	0.053	0.145	0.111	0.183	0.004	0.057	0.058	0.038	0.072	0.115	0.055	0.121	0.104	0.176	0.182	0.241	0.048	0.042	0.066	0.014	0.078	0.077
10.25	0.048	0.07	0.073	0.036	0.108	0.05	0.234	0.268	0.323	0.008	0.077	0.055	0.17	0.131	0.209	0.004	0.061	0.06	0.044	0.081	0.128	0.067	0.133	0.116	0.204	0.208	0.273	0.055	0.047	0.076	0.016	0.082	0.082
10.5	0.057	0.081	0.085	0.04	0.116	0.054	0.275	0.311	0.37	0.009	0.078	0.052	0.197	0.152	0.236	0.004	0.065	0.061	0.051	0.089	0.143	0.08	0.146	0.133	0.234	0.237	0.308	0.064	0.054	0.087	0.019	0.087	0.087
10.75	0.067	0.096	0.1	0.045	0.127	0.058	0.322	0.36	0.42	0.01	0.078	0.054	0.229	0.177	0.268	0.004	0.07	0.061	0.059	0.1	0.161	0.097	0.162	0.151	0.27	0.269	0.347	0.073	0.061	0.1	0.023	0.093	0.093
11	0.08	0.111	0.119	0.051	0.139	0.063	0.374	0.415	0.477	0.011	0.08	0.056	0.263	0.206	0.304	0.005	0.074	0.063	0.069	0.111	0.18	0.117	0.18	0.173	0.308	0.306	0.39	0.084	0.07	0.115	0.027	0.1	0.101
11.25	0.095	0.13	0.139	0.058	0.152	0.067	0.429	0.471	0.533	0.013	0.082	0.057	0.302	0.238	0.342	0.006	0.08	0.065	0.08	0.125	0.201	0.139	0.203	0.194	0.349	0.346	0.436	0.096	0.081	0.13	0.032	0.108	0.109
11.5	0.112	0.152	0.164	0.066	0.165	0.072	0.488	0.53	0.595	0.014	0.084	0.059	0.345	0.276	0.384	0.006	0.086	0.065	0.093	0.139	0.225	0.162	0.226	0.218	0.394	0.391	0.486	0.11	0.091	0.148	0.037	0.116	0.118
11.75	0.134	0.178	0.191	0.075	0.183	0.079	0.551	0.594	0.658	0.016	0.087	0.061	0.392	0.315	0.433	0.007	0.092	0.066	0.107	0.156	0.251	0.191	0.252	0.244	0.444	0.439	0.54	0.125	0.104	0.166	0.043	0.126	0.128
12	0.165	0.209	0.224	0.085	0.201	0.086	0.615	0.659	0.724	0.018	0.089	0.063	0.442	0.359	0.481	0.008	0.099	0.068	0.124	0.176	0.28	0.217	0.28	0.275	0.495	0.49	0.594	0.141	0.118	0.187	0.05	0.137	0.14
12.25	0.192	0.243	0.263	0.096	0.223	0.095	0.682	0.724	0.79	0.021	0.092	0.066	0.497	0.408	0.534	0.01	0.107	0.071	0.145	0.198	0.314	0.249	0.311	0.307	0.552	0.547	0.654	0.16	0.134	0.211	0.06	0.149	0.154
12.5	0.227	0.283	0.308	0.11	0.245	0.104	0.747	0.79	0.853	0.023	0.095	0.068	0.55	0.459	0.589	0.011	0.116	0.073	0.166	0.223	0.348	0.284	0.345	0.341	0.609	0.604	0.713	0.181	0.151	0.237	0.069	0.163	0.168
12.75	0.267	0.325	0.359	0.124	0.272	0.114	0.812	0.852	0.912	0.026	0.098	0.071	0.612	0.515	0.649	0.012	0.126	0.076	0.191	0.252	0.387	0.315	0.376	0.377	0.667	0.663	0.775	0.204	0.171	0.266	0.081	0.179	0.185
13	0.314	0.375	0.416	0.141	0.299	0.125	0.873	0.909	0.97	0.029	0.101	0.073	0.671	0.575	0.709	0.013	0.136	0.078	0.22	0.283	0.429	0.354	0.412	0.416	0.729	0.723	0.835	0.229	0.191	0.297	0.094	0.196	0.204
13.25	0.364	0.428	0.475	0.161	0.33	0.139	0.931	0.963	1.023	0.032	0.105	0.076	0.732	0.635	0.767	0.015	0.147	0.081	0.252	0.316	0.475	0.393	0.449	0.454	0.788	0.785	0.893	0.256	0.216	0.331	0.109	0.215	0.225
13.5	0.423	0.487	0.541	0.184	0.366	0.153	0.985	1.012	1.073	0.036	0.107	0.078	0.792	0.697	0.829	0.017	0.158	0.084	0.286	0.355	0.525	0.437	0.491	0.496	0.847	0.844	0.951	0.285	0.242	0.368	0.126	0.236	0.249
13.75	0.485	0.548	0.607	0.212	0.404	0.169	1.032	1.057	1.12	0.039	0.11	0.082	0.85	0.759	0.887	0.018	0.171	0.086	0.324	0.397	0.577	0.487	0.536	0.54	0.904	0.903	1.005	0.319	0.268	0.409	0.145	0.259	0.273
14	0.554	0.614	0.677	0.242	0.443	0.188	1.076	1.099	1.157	0.045	0.115	0.085	0.908	0.822	0.946	0.021	0.186	0.089	0.367	0.444	0.63	0.533	0.581	0.587	0.958	0.958	1.057	0.355	0.3	0.453	0.166	0.284	0.3
14.25	0.625	0.679	0.748	0.276	0.488	0.212	1.114	1.138	1.194	0.05	0.118	0.089	0.959	0.883	0.998	0.023	0.201	0.093	0.415	0.493	0.688	0.582	0.628	0.632	1.01	1.013	1.106	0.395	0.335	0.499	0.189	0.312	0.33
14.5	0.699	0.747	0.817	0.318	0.533	0.241	1.149	1.173	1.227	0.057	0.119	0.095	1.01	0.941	1.048	0.027	0.219	0.097	0.465	0.548	0.748	0.632	0.677	0.68	1.057	1.064	1.151	0.436	0.369	0.549	0.217	0.343	0.364
14.75	0.769	0.814	0.88	0.36	0.581	0.272	1.18	1.202	1.255	0.063	0.124	0.099	1.056	0.994	1.093	0.03	0.235	0.101	0.521	0.605	0.806	0.684	0.724	0.727	1.102	1.111	1.191	0.481	0.407	0.6	0.245	0.375	0.399
15	0.837	0.882	0.94	0.407	0.63	0.307	1.207	1.23	1.284	0.069	0.129	0.103	1.098	1.045	1.136	0.033	0.254	0.104	0.577	0.663	0.866	0.734	0.772	0.771	1.142	1.155	1.229	0.529	0.45	0.652	0.275	0.411	0.436
15.25	0.904	0.946	0.998	0.456	0.683	0.349	1.236	1.257	1.309	0.078	0.136	0.109	1.136	1.091	1.175	0.037	0.275	0.109	0.635	0.725	0.924	0.781	0.818	0.818	1.181	1.194	1.263	0.577	0.492	0.707	0.31	0.449	0.474
15.5	0.966	1.003	1.049	0.506	0.735	0.395	1.262	1.283	1.332	0.087	0.142	0.116	1.172	1.134	1.212	0.042	0.295	0.114	0.698	0.787	0.98	0.831	0.864	0.859	1.215	1.231	1.294	0.629	0.54	0.763	0.348	0.49	0.515
15.75	1.022	1.059	1.096	0.561	0.788	0.444	1.285	1.306	1.354	0.096	0.15	0.121	1.204	1.175	1.244	0.048	0.32	0.119	0.76	0.852	1.035	0.875	0.907	0.897	1.248	1.265	1.324	0.682	0.586	0.819	0.387	0.533	0.559
16	1.075	1.108	1.136	0.616	0.841	0.495	1.307	1.327	1.372	0.107	0.158	0.127	1.235	1.211	1.273	0.053	0.345	0.124	0.823	0.909	1.085	0.92	0.95	0.934	1.275	1.294	1.349	0.734	0.638	0.874	0.427	0.578	0.603
16.25	1.121	1.152	1.174	0.673	0.893	0.552	1.325	1.348	1.388	0.119	0.167	0.136	1.261	1.244	1.301	0.061	0.371	0.13	0.885	0.968	1.133	0.96	0.987	0.97	1.302	1.322	1.373	0.793	0.686	0.93	0.471	0.625	0.648
16.5	1.161	1.191	1.208	0.733	0.944	0.612	1.339	1.363	1.4	0.133	0.178	0.144	1.286	1.275	1.326	0.07	0.399	0.137	0.943	1.024	1.175	0.997	1.025	1.003	1.326	1.348	1.397	0.849	0.739	0.983	0.516	0.672	0.696
16.75	1.198	1.226	1.24	0.788	0.992	0.669	1.35	1.375	1.408	0.149	0.189	0.152	1.31	1.303	1.348	0.08	0.427	0.144	1	1.074	1.215	1.033	1.059	1.033	1.348	1.371	1.416	0.905	0.794	1.035	0.564	0.723	0.742
17	1.233	1.256	1.267	0.843	1.036	0.733	1.357	1.382	1.414	0.165	0.202	0.163	1.33	1.327	1.368	0.091	0.459	0.15	1.051	1.123	1.251	1.063	1.093	1.062	1.368	1.391	1.434	0.959	0.848	1.085	0.615	0.771	0.793
17.25	1.258	1.284	1.293	0.896	1.077	0.79	1.363	1.389	1.419	0.182	0.216	0.172	1.347	1.35	1.387	0.103	0.488	0.158	1.099	1.166	1.285	1.092	1.122	1.087	1.384	1.409	1.449	1.013	0.902	1.132	0.663	0.82	0.838
17.5	1.284	1.308	1.316	0.945	1.114	0.848	1.365	1.393	1.423	0.201	0.231	0.184	1.363	1.368	1.402	0.116	0.518	0.166	1.144	1.205	1.316	1.12	1.148	1.114	1.397	1.424	1.462	1.063	0.953	1.175	0.713	0.871	0.888
17.75	1.302	1.325	1.331	0.99	1.149	0.904	1.368	1.396	1.426	0.222	0.249	0.195	1.373	1.382	1.415	0.13	0.546	0.175	1.185	1.244	1.341	1.145	1.174	1.138	1.406	1.434	1.471	1.113	1.01	1.217	0.762	0.915	0.932
18	1.316	1.338	1.345	1.033	1.18	0.956	1.37	1.399	1.428	0.244	0.268	0.208	1.381	1.394	1.424	0.145	0.577	0.184	1.222	1.278	1.368	1.168	1.198	1.161	1.413	1.442	1.478	1.159	1.057	1.255	0.81	0.961	0.978
18.25	1.324	1.347	1.352	1.072	1.21	1.005	1.37	1.401	1.43	0.269	0.29	0.222	1.387	1.401	1.43	0.159	0.606	0.194	1.255	1.308	1.391	1.19	1.219	1.182	1.417	1.447	1.482	1.203	1.105	1.29	0.856	1.007	1.021
18.5	1.33	1.353	1.358	1.108	1.236	1.051	1.371	1.402	1.432	0.295	0.311	0.237	1.39	1.407	1.435	0.176	0.638	0.204	1.285	1.335	1.412	1.211	1.241	1.203	1.421	1.452	1.486	1.245	1.152	1.323	0.901	1.047	1.061
18.75	1.335	1.358	1.362	1.141	1.26	1.093	1.371	1.403	1.432	0.323	0.337	0.253	1.392	1.412	1.439	0.193	0.665	0.215	1.313	1.361	1.432	1.231	1.262	1.219	1.422	1.454	1.488	1.282	1.195	1.353	0.945	1.088	1.1
19	1.338	1.361	1.366	1.17	1.283	1.13	1.371	1.404	1.432	0.353	0.361	0.272	1.394	1.415	1.442	0.209	0.697	0.225	1.338	1.384	1.449	1.248	1.281	1.24	1.424	1.457	1.49	1.316	1.234	1.382	0.987	1.123	1.137
19.25	1.342	1.364	1.368	1.197	1.303	1.165	1.371	1.405	1.432	0.385	0.387	0.291	1.395	1.416	1.444	0.227	0.724	0.238	1.361	1.404	1.466	1.265	1.299	1.257	1.425	1.459	1.491	1.348	1.272	1.408	1.026	1.158	1.17
19.5	1.342	1.365	1.369	1.222	1.322	1.199	1.372	1.405	1.433	0.419	0.42	0.307	1.396	1.417	1.445	0.246	0.753	0.252	1.382	1.424	1.482	1.279	1.318	1.272	1.425	1.459	1.492	1.379	1.307	1.432	1.062	1.189	1.202
19.75	1.342	1.367	1.37	1.246	1.34	1.226	1.372	1.406	1.433	0.454	0.444	0.331	1.396	1.418	1.446	0.263	0.779	0.265	1.4	1.442	1.495	1.295	1.333	1.288	1.425	1.46	1.493	1.406	1.34	1.454	1.097	1.219	1.232
20	1.343	1.367	1.371	1.268	1.357	1.253	1.372	1.406	1.434	0.487	0.479	0.348	1.396	1.419	1.448	0.283	0.805	0.281	1.415	1.456	1.507	1.309	1.347	1.303	1.425	1.46	1.494	1.432	1.372	1.475	1.128	1.244	1.259
20.25	1.343	1.367	1.372	1.287	1.372	1.279	1.373	1.407	1.434	0.528	0.514	0.377	1.397	1.419	1.448	0.303	0.836	0.298	1.426	1.468	1.516	1.323	1.363	1.318	1.425	1.461	1.494	1.454	1.4	1.494	1.156	1.269	1.284
20.5	1.344	1.368	1.372	1.304	1.387	1.301	1.373	1.408	1.434	0.567	0.554	0.402	1.396	1.42	1.448	0.322	0.861	0.316	1.434	1.476	1.523	1.336	1.374	1.331	1.425	1.462	1.494	1.477	1.426	1.512	1.184	1.293	1.308
20.75	1.344	1.368	1.372	1.32	1.4	1.318	1.373	1.408	1.435	0.603	0.595	0.428	1.396	1.42	1.448	0.346	0.89	0.332	1.44	1.482	1.528	1.349	1.388	1.345	1.425	1.462	1.496	1.497	1.45	1.526	1.209	1.313	1.328
21	1.345	1.369	1.374	1.332	1.41	1.331	1.373	1.409	1.436	0.65	0.638	0.459	1.397	1.42	1.449	0.367	0.918	0.35	1.444	1.487	1.531	1.36	1.4	1.358	1.426	1.462	1.495	1.515	1.473	1.537	1.232	1.332	1.347
21.25	1.345	1.368	1.373	1.341	1.418	1.339	1.373	1.409	1.436	0.686	0.685	0.49	1.397	1.421	1.449	0.388	0.942	0.37	1.447	1.49	1.533	1.371	1.412	1.373	1.425	1.463	1.496	1.528	1.491	1.546	1.252	1.349	1.365
21.5	1.345	1.367	1.373	1.347	1.423	1.346	1.374	1.41	1.436	0.727	0.733	0.527	1.397	1.421	1.449	0.412	0.973	0.392	1.448	1.493	1.535	1.382	1.423	1.385	1.425	1.463	1.496	1.54	1.507	1.552	1.27	1.366	1.382
21.75	1.345	1.368	1.373	1.351	1.427	1.353	1.374	1.41	1.437	0.772	0.785	0.56	1.398	1.421	1.45	0.433	0.995	0.415	1.449	1.493	1.535	1.395	1.434	1.398	1.425	1.463	1.497	1.549	1.521	1.557	1.286	1.379	1.395
22	1.345	1.368	1.374	1.354	1.429	1.355	1.373	1.41	1.438	0.814	0.838	0.6	1.397	1.421	1.45	0.458	1.024	0.436	1.449	1.494	1.536	1.405	1.445	1.411	1.424	1.462	1.497	1.555	1.528	1.561	1.296	1.388	1.407
22.25	1.345	1.367	1.373	1.356	1.431	1.359	1.374	1.41	1.438	0.852	0.888	0.639	1.397	1.421	1.45	0.486	1.053	0.457	1.449	1.495	1.536	1.416	1.456	1.424	1.424	1.463	1.497	1.56	1.536	1.564	1.303	1.395	1.416
22.5	1.345	1.367	1.373	1.357	1.432	1.363	1.374	1.41	1.439	0.899	0.947	0.68	1.397	1.421	1.451	0.51	1.084	0.479	1.449	1.495	1.537	1.427	1.467	1.436	1.425	1.463	1.498	1.564	1.541	1.565	1.31	1.401	1.422
22.75	1.345	1.368	1.373	1.359	1.434	1.365	1.374	1.411	1.438	0.941	0.999	0.725	1.397	1.422	1.451	0.537	1.114	0.502	1.449	1.496	1.537	1.436	1.477	1.447	1.425	1.463	1.499	1.566	1.544	1.567	1.315	1.405	1.427
23	1.345	1.368	1.374	1.36	1.435	1.366	1.374	1.411	1.438	0.989	1.046	0.773	1.397	1.422	1.451	0.566	1.145	0.528	1.449	1.496	1.536	1.445	1.486	1.457	1.425	1.463	1.498	1.567	1.548	1.568	1.317	1.407	1.432
23.25	1.346	1.369	1.375	1.361	1.438	1.369	1.375	1.412	1.439	1.032	1.092	0.821	1.398	1.422	1.452	0.595	1.175	0.556	1.449	1.497	1.538	1.452	1.496	1.466	1.425	1.464	1.499	1.569	1.548	1.569	1.321	1.411	1.435
23.5	1.345	1.369	1.375	1.363	1.439	1.37	1.376	1.413	1.44	1.075	1.138	0.871	1.398	1.424	1.453	0.623	1.205	0.584	1.45	1.498	1.537	1.459	1.504	1.473	1.425	1.464	1.5	1.57	1.55	1.569	1.323	1.413	1.437
23.75	1.345	1.369	1.375	1.363	1.439	1.373	1.375	1.413	1.439	1.109	1.179	0.915	1.398	1.423	1.453	0.649	1.233	0.614	1.45	1.497	1.537	1.463	1.51	1.477	1.425	1.464	1.5	1.572	1.55	1.57	1.323	1.414	1.439
24	1.345	1.369	1.375	1.363	1.439	1.373	1.375	1.413	1.44	1.151	1.214	0.962	1.398	1.423	1.452	0.676	1.263	0.641	1.448	1.497	1.536	1.466	1.513	1.48	1.424	1.464	1.5	1.571	1.551	1.57	1.324	1.415	1.439
24.25	1.345	1.37	1.376	1.362	1.439	1.364	1.376	1.415	1.439	1.188	1.249	1.015	1.397	1.424	1.453	0.707	1.289	0.675	1.449	1.498	1.536	1.467	1.516	1.482	1.424	1.465	1.5	1.572	1.551	1.57	1.323	1.415	1.441
24.5	1.345	1.37	1.376	1.363	1.441	1.365	1.376	1.415	1.44	1.223	1.28	1.061	1.398	1.424	1.454	0.739	1.316	0.709	1.448	1.499	1.537	1.468	1.519	1.484	1.424	1.466	1.501	1.572	1.552	1.57	1.324	1.415	1.442
24.75	1.344	1.371	1.376	1.363	1.441	1.365	1.376	1.416	1.44	1.258	1.309	1.106	1.399	1.425	1.455	0.767	1.343	0.751	1.448	1.499	1.537	1.47	1.521	1.485	1.424	1.467	1.501	1.572	1.552	1.571	1.325	1.417	1.442
25	1.344	1.371	1.377	1.363	1.442	1.367	1.377	1.417	1.44	1.286	1.335	1.144	1.399	1.425	1.455	0.799	1.369	0.792	1.448	1.499	1.537	1.47	1.521	1.486	1.424	1.466	1.502	1.572	1.552	1.571	1.324	1.418	1.442
25.25	1.344	1.37	1.377	1.364	1.443	1.367	1.377	1.417	1.441	1.312	1.359	1.182	1.399	1.426	1.455	0.831	1.39	0.833	1.448	1.499	1.538	1.47	1.523	1.487	1.424	1.467	1.502	1.573	1.552	1.571	1.324	1.418	1.442
25.5	1.345	1.37	1.376	1.365	1.444	1.369	1.378	1.418	1.443	1.335	1.38	1.219	1.4	1.426	1.456	0.866	1.412	0.87	1.449	1.499	1.539	1.472	1.524	1.486	1.425	1.468	1.503	1.572	1.553	1.571	1.325	1.419	1.444
25.75	1.344	1.37	1.377	1.364	1.443	1.369	1.377	1.418	1.442	1.355	1.396	1.249	1.399	1.426	1.456	0.902	1.43	0.908	1.448	1.499	1.537	1.47	1.524	1.486	1.424	1.468	1.503	1.573	1.551	1.571	1.324	1.418	1.444
26	1.344	1.37	1.378	1.365	1.444	1.37	1.378	1.419	1.443	1.371	1.411	1.274	1.399	1.427	1.457	0.937	1.451	0.949	1.448	1.499	1.537	1.47	1.524	1.488	1.424	1.468	1.504	1.573	1.552	1.57	1.324	1.42	1.444
26.25	1.344	1.37	1.377	1.365	1.445	1.371	1.378	1.419	1.444	1.382	1.421	1.291	1.399	1.427	1.458	0.973	1.468	0.991	1.448	1.5	1.536	1.47	1.525	1.488	1.425	1.468	1.503	1.574	1.553	1.571	1.324	1.419	1.444
26.5	1.344	1.37	1.377	1.365	1.447	1.371	1.379	1.42	1.445	1.392	1.428	1.306	1.4	1.428	1.459	1.005	1.484	1.03	1.448	1.5	1.537	1.471	1.525	1.49	1.425	1.469	1.504	1.573	1.553	1.571	1.325	1.42	1.445
26.75	1.344	1.369	1.377	1.366	1.447	1.374	1.379	1.421	1.445	1.396	1.432	1.312	1.4	1.428	1.459	1.039	1.499	1.067	1.448	1.5	1.537	1.47	1.525	1.49	1.425	1.47	1.504	1.573	1.552	1.571	1.325	1.42	1.445
27	1.344	1.369	1.378	1.367	1.448	1.374	1.379	1.421	1.446	1.399	1.437	1.32	1.4	1.429	1.46	1.074	1.512	1.105	1.448	1.5	1.538	1.47	1.525	1.491	1.425	1.471	1.505	1.573	1.553	1.57	1.324	1.421	1.446
27.25	1.344	1.369	1.377	1.367	1.449	1.376	1.379	1.422	1.445	1.402	1.438	1.327	1.401	1.43	1.46	1.106	1.524	1.135	1.448	1.501	1.538	1.47	1.526	1.491	1.425	1.471	1.505	1.573	1.552	1.571	1.325	1.421	1.446
27.5	1.344	1.368	1.377	1.368	1.45	1.376	1.379	1.422	1.446	1.404	1.439	1.331	1.401	1.43	1.462	1.134	1.535	1.167	1.448	1.501	1.539	1.47	1.526	1.493	1.425	1.472	1.503	1.574	1.552	1.571	1.324	1.421	1.447
27.75	1.344	1.368	1.377	1.368	1.451	1.377	1.379	1.422	1.447	1.404	1.439	1.332	1.4	1.43	1.46	1.154	1.544	1.196	1.447	1.502	1.538	1.47	1.526	1.493	1.425	1.472	1.504	1.573	1.553	1.571	1.324	1.421	1.447
28	1.343	1.368	1.377	1.367	1.452	1.378	1.379	1.422	1.447	1.404	1.44	1.334	1.401	1.43	1.461	1.177	1.55	1.22	1.447	1.501	1.538	1.468	1.525	1.491	1.425	1.472	1.505	1.574	1.552	1.571	1.324	1.421	1.448
28.25	1.343	1.369	1.377	1.368	1.452	1.38	1.38	1.424	1.448	1.404	1.441	1.334	1.401	1.432	1.461	1.194	1.559	1.241	1.447	1.502	1.538	1.469	1.526	1.493	1.425	1.473	1.505	1.574	1.553	1.571	1.324	1.422	1.448
28.5	1.344	1.369	1.377	1.369	1.453	1.38	1.38	1.424	1.448	1.405	1.441	1.337	1.401	1.432	1.463	1.204	1.563	1.255	1.448	1.502	1.539	1.469	1.527	1.493	1.426	1.473	1.505	1.574	1.553	1.572	1.325	1.422	1.449
28.75	1.344	1.369	1.376	1.369	1.454	1.382	1.38	1.425	1.448	1.404	1.442	1.334	1.402	1.432	1.462	1.215	1.568	1.265	1.448	1.502	1.539	1.469	1.527	1.493	1.426	1.473	1.506	1.574	1.553	1.571	1.324	1.423	1.45
29	1.343	1.368	1.376	1.369	1.455	1.382	1.38	1.424	1.448	1.404	1.442	1.336	1.402	1.432	1.463	1.218	1.57	1.277	1.447	1.502	1.539	1.468	1.525	1.493	1.425	1.474	1.506	1.574	1.553	1.571	1.324	1.422	1.451
29.25	1.343	1.368	1.376	1.37	1.455	1.382	1.38	1.425	1.449	1.404	1.441	1.339	1.402	1.433	1.464	1.224	1.572	1.282	1.447	1.503	1.539	1.468	1.525	1.494	1.426	1.474	1.507	1.575	1.553	1.572	1.324	1.422	1.451
29.5	1.344	1.368	1.376	1.37	1.455	1.384	1.38	1.426	1.449	1.404	1.442	1.341	1.403	1.434	1.464	1.23	1.574	1.288	1.447	1.503	1.539	1.468	1.525	1.494	1.426	1.475	1.508	1.574	1.553	1.571	1.324	1.423	1.451
29.75	1.344	1.368	1.377	1.371	1.455	1.386	1.381	1.426	1.449	1.405	1.442	1.343	1.403	1.435	1.464	1.233	1.576	1.294	1.447	1.505	1.539	1.469	1.526	1.495	1.427	1.476	1.509	1.574	1.552	1.571	1.325	1.424	1.452
30	1.344	1.368	1.376	1.37	1.456	1.385	1.38	1.427	1.449	1.404	1.442	1.341	1.402	1.434	1.465	1.236	1.576	1.292	1.446	1.504	1.538	1.468	1.525	1.494	1.426	1.476	1.509	1.575	1.553	1.572	1.324	1.423	1.452
30.25	1.344	1.368	1.376	1.37	1.456	1.386	1.38	1.427	1.45	1.403	1.442	1.342	1.403	1.436	1.465	1.237	1.578	1.298	1.447	1.504	1.539	1.468	1.526	1.495	1.426	1.477	1.509	1.576	1.554	1.571	1.324	1.424	1.453
30.5	1.343	1.368	1.376	1.372	1.456	1.388	1.381	1.427	1.45	1.402	1.441	1.343	1.404	1.435	1.466	1.24	1.578	1.299	1.447	1.504	1.539	1.468	1.526	1.495	1.426	1.477	1.51	1.575	1.554	1.572	1.324	1.424	1.453
30.75	1.344	1.368	1.376	1.371	1.457	1.389	1.381	1.428	1.451	1.403	1.442	1.34	1.404	1.436	1.467	1.239	1.578	1.301	1.448	1.504	1.539	1.468	1.526	1.495	1.426	1.477	1.511	1.575	1.553	1.572	1.324	1.424	1.454
31	1.344	1.368	1.376	1.372	1.458	1.389	1.381	1.429	1.451	1.403	1.442	1.342	1.404	1.437	1.467	1.24	1.579	1.304	1.447	1.505	1.539	1.468	1.526	1.495	1.427	1.478	1.511	1.575	1.554	1.572	1.324	1.424	1.454
31.25	1.343	1.367	1.375	1.371	1.456	1.389	1.381	1.428	1.451	1.402	1.442	1.342	1.403	1.436	1.467	1.242	1.578	1.303	1.447	1.505	1.539	1.467	1.526	1.494	1.427	1.478	1.51	1.575	1.553	1.572	1.324	1.425	1.454
31.5	1.343	1.367	1.376	1.371	1.458	1.391	1.381	1.429	1.452	1.402	1.442	1.34	1.404	1.438	1.468	1.243	1.578	1.305	1.447	1.506	1.54	1.467	1.527	1.495	1.427	1.479	1.511	1.575	1.553	1.572	1.324	1.426	1.455
31.75	1.342	1.367	1.375	1.37	1.458	1.391	1.38	1.429	1.452	1.401	1.442	1.342	1.405	1.438	1.469	1.246	1.579	1.304	1.446	1.506	1.539	1.467	1.527	1.494	1.427	1.479	1.511	1.575	1.554	1.572	1.323	1.425	1.455
32	1.343	1.367	1.375	1.371	1.459	1.392	1.38	1.429	1.452	1.401	1.442	1.341	1.404	1.438	1.469	1.244	1.579	1.306	1.446	1.506	1.539	1.467	1.526	1.494	1.427	1.479	1.512	1.575	1.555	1.572	1.323	1.426	1.455
32.25	1.343	1.366	1.374	1.371	1.459	1.393	1.38	1.429	1.451	1.401	1.442	1.341	1.404	1.438	1.47	1.245	1.579	1.307	1.446	1.506	1.539	1.466	1.525	1.495	1.427	1.479	1.512	1.575	1.554	1.572	1.323	1.426	1.455
32.5	1.343	1.368	1.375	1.371	1.46	1.394	1.381	1.429	1.453	1.401	1.442	1.341	1.405	1.438	1.47	1.246	1.58	1.308	1.447	1.506	1.54	1.466	1.525	1.496	1.427	1.48	1.513	1.575	1.554	1.571	1.323	1.427	1.455
32.75	1.343	1.367	1.375	1.371	1.459	1.393	1.381	1.43	1.452	1.402	1.442	1.344	1.405	1.439	1.471	1.247	1.581	1.31	1.447	1.506	1.54	1.467	1.526	1.495	1.428	1.481	1.513	1.576	1.555	1.572	1.323	1.427	1.456
33	1.342	1.367	1.375	1.37	1.46	1.392	1.38	1.43	1.452	1.401	1.442	1.344	1.405	1.439	1.472	1.248	1.581	1.31	1.446	1.506	1.54	1.467	1.525	1.496	1.428	1.48	1.514	1.576	1.554	1.572	1.323	1.428	1.456
33.25	1.342	1.367	1.374	1.37	1.46	1.393	1.38	1.431	1.452	1.4	1.442	1.345	1.406	1.439	1.471	1.248	1.581	1.309	1.447	1.506	1.541	1.466	1.525	1.495	1.428	1.481	1.511	1.576	1.555	1.572	1.323	1.427	1.457
33.5	1.342	1.367	1.374	1.37	1.461	1.396	1.38	1.431	1.451	1.4	1.443	1.343	1.405	1.44	1.471	1.247	1.581	1.312	1.446	1.507	1.541	1.466	1.525	1.496	1.427	1.481	1.511	1.575	1.555	1.572	1.323	1.427	1.458
33.75	1.342	1.367	1.374	1.37	1.462	1.395	1.38	1.431	1.452	1.4	1.443	1.345	1.406	1.44	1.472	1.248	1.582	1.312	1.446	1.507	1.543	1.466	1.524	1.497	1.428	1.482	1.513	1.576	1.556	1.573	1.323	1.427	1.456
34	1.342	1.367	1.374	1.369	1.461	1.395	1.38	1.431	1.452	1.4	1.442	1.346	1.406	1.441	1.471	1.25	1.582	1.313	1.446	1.506	1.541	1.466	1.525	1.497	1.428	1.481	1.512	1.576	1.556	1.572	1.323	1.427	1.456
34.25	1.342	1.367	1.374	1.369	1.463	1.396	1.38	1.432	1.452	1.401	1.443	1.347	1.406	1.441	1.471	1.249	1.583	1.315	1.446	1.507	1.542	1.466	1.525	1.496	1.428	1.482	1.513	1.576	1.556	1.572	1.323	1.428	1.457
34.5	1.342	1.366	1.374	1.369	1.463	1.396	1.38	1.432	1.452	1.4	1.443	1.347	1.406	1.441	1.471	1.249	1.583	1.314	1.447	1.507	1.541	1.466	1.526	1.498	1.428	1.482	1.513	1.576	1.556	1.573	1.323	1.428	1.457
34.75	1.342	1.366	1.373	1.369	1.463	1.397	1.38	1.432	1.453	1.4	1.444	1.346	1.406	1.441	1.472	1.248	1.582	1.316	1.446	1.507	1.542	1.466	1.526	1.499	1.428	1.483	1.514	1.577	1.557	1.573	1.322	1.427	1.458
35	1.342	1.366	1.373	1.369	1.463	1.397	1.38	1.432	1.454	1.4	1.444	1.347	1.406	1.442	1.472	1.248	1.583	1.315	1.446	1.507	1.542	1.466	1.526	1.498	1.428	1.482	1.513	1.577	1.557	1.573	1.322	1.427	1.458
35.25	1.342	1.366	1.373	1.368	1.463	1.399	1.38	1.433	1.454	1.399	1.444	1.349	1.406	1.443	1.473	1.25	1.583	1.317	1.446	1.507	1.543	1.465	1.526	1.498	1.429	1.482	1.515	1.576	1.556	1.573	1.322	1.426	1.458
35.5	1.342	1.366	1.373	1.369	1.463	1.398	1.379	1.433	1.454	1.399	1.444	1.349	1.406	1.442	1.472	1.248	1.583	1.315	1.446	1.507	1.543	1.466	1.526	1.499	1.429	1.483	1.515	1.577	1.556	1.574	1.322	1.428	1.458
35.75	1.342	1.367	1.374	1.368	1.463	1.4	1.379	1.433	1.455	1.4	1.444	1.351	1.407	1.442	1.473	1.249	1.584	1.317	1.447	1.507	1.544	1.465	1.527	1.501	1.429	1.482	1.516	1.577	1.557	1.573	1.323	1.428	1.456
36	1.342	1.366	1.374	1.368	1.464	1.4	1.38	1.434	1.455	1.399	1.445	1.351	1.407	1.443	1.473	1.248	1.584	1.317	1.447	1.507	1.543	1.466	1.525	1.5	1.429	1.483	1.516	1.577	1.557	1.573	1.323	1.428	1.456

## Sheet: Growth Curve 1ug FLC
Supplementary file 3: Growth curve raw data and analysis
Raw growth curve data in YPAD + 1ug/ml FLC
Time	SC5314 Biol 1	SC5314 Biol 2	SC5314 Biol 3	AMS4702 Biol 1	AMS4702 Biol 2	AMS4702 Biol 3	P75016 Biol 1	P75016 Biol2	P75016 Biol 3	AMS4397 Biol 1	AMS4397 Biol 2	AMS4397 Biol 3	P75063 Biol 1	P75063 Biol 2	P75063 Biol 3	AMS4104 Biol 1	AMS4104 Biol 2	AMS4104 Biol 3	AMS4105 Biol 1	AMS4105 Biol 2	AMS4105 Biol 3	AMS4106 Biol 1	AMS4106 Biol 2	AMS4106 Biol 3	AMS4107 Biol 1	AMS4107 Biol 2	AMS4107 Biol 3	P78042 Biol 1	P78042 Biol 2	P78042 Biol 3	AMS4444 Biol 1	AMS4444 Biol 2	AMS4444 Biol 3
0.25	0.012	0.009	0.008	0.008	0.009	0.01	0.008	0.009	0.013	0.011	0.01	0.01	0.01	0.01	0.012	0.012	0.01	0.009	0.011	0.01	0.014	0.008	0.007	0.009	0.01	0.018	0.011	0.002	0.003	0.005	0.004	0.005	0.004
0.5	0.013	0.01	0.009	0.009	0.01	0.011	0.009	0.01	0.014	0.012	0.011	0.011	0.01	0.011	0.013	0.013	0.011	0.01	0.012	0.011	0.015	0.01	0.008	0.01	0.011	0.019	0.012	0.002	0.003	0.006	0.004	0.005	0.004
0.75	0.012	0.009	0.008	0.008	0.009	0.01	0.008	0.009	0.013	0.011	0.01	0.01	0.01	0.01	0.012	0.012	0.01	0.009	0.011	0.01	0.014	0.009	0.007	0.009	0.01	0.018	0.011	0.003	0.003	0.006	0.004	0.006	0.004
1	0.011	0.009	0.007	0.008	0.009	0.009	0.009	0.008	0.013	0.01	0.01	0.01	0.009	0.009	0.011	0.012	0.01	0.008	0.01	0.01	0.014	0.008	0.007	0.009	0.01	0.017	0.01	0.003	0.003	0.006	0.004	0.006	0.005
1.25	0.011	0.009	0.008	0.008	0.009	0.01	0.009	0.009	0.013	0.011	0.01	0.01	0.009	0.009	0.011	0.012	0.01	0.009	0.011	0.01	0.014	0.009	0.007	0.009	0.01	0.017	0.011	0.003	0.003	0.006	0.004	0.006	0.005
1.5	0.011	0.009	0.007	0.007	0.009	0.009	0.008	0.008	0.012	0.01	0.009	0.009	0.009	0.009	0.011	0.011	0.01	0.008	0.011	0.01	0.014	0.008	0.007	0.009	0.01	0.017	0.01	0.003	0.003	0.006	0.004	0.006	0.005
1.75	0.011	0.009	0.007	0.007	0.009	0.009	0.008	0.008	0.012	0.01	0.009	0.009	0.009	0.009	0.011	0.012	0.01	0.008	0.011	0.01	0.014	0.008	0.007	0.009	0.01	0.017	0.01	0.003	0.004	0.006	0.005	0.007	0.005
2	0.011	0.009	0.007	0.007	0.008	0.009	0.008	0.008	0.012	0.01	0.009	0.009	0.009	0.009	0.011	0.011	0.009	0.008	0.011	0.01	0.013	0.008	0.007	0.008	0.01	0.017	0.01	0.003	0.003	0.006	0.005	0.006	0.005
2.25	0.011	0.009	0.007	0.007	0.008	0.009	0.009	0.008	0.012	0.01	0.009	0.009	0.009	0.009	0.011	0.011	0.01	0.008	0.011	0.01	0.014	0.008	0.007	0.009	0.01	0.017	0.01	0.003	0.004	0.007	0.005	0.007	0.006
2.5	0.011	0.009	0.007	0.007	0.008	0.009	0.009	0.008	0.012	0.01	0.009	0.009	0.009	0.009	0.011	0.011	0.009	0.008	0.011	0.01	0.013	0.008	0.007	0.008	0.01	0.016	0.01	0.004	0.004	0.007	0.005	0.007	0.006
2.75	0.011	0.009	0.007	0.007	0.008	0.009	0.009	0.008	0.012	0.01	0.009	0.009	0.009	0.009	0.011	0.011	0.009	0.008	0.011	0.01	0.013	0.008	0.007	0.008	0.01	0.015	0.01	0.004	0.004	0.007	0.005	0.008	0.006
3	0.012	0.009	0.008	0.007	0.008	0.009	0.01	0.009	0.013	0.011	0.009	0.009	0.009	0.009	0.011	0.012	0.01	0.009	0.011	0.01	0.014	0.008	0.008	0.009	0.01	0.014	0.011	0.004	0.004	0.007	0.005	0.008	0.006
3.25	0.011	0.009	0.008	0.007	0.009	0.009	0.01	0.009	0.013	0.011	0.01	0.01	0.009	0.009	0.011	0.014	0.01	0.009	0.011	0.01	0.014	0.008	0.008	0.009	0.011	0.013	0.011	0.004	0.004	0.007	0.006	0.009	0.007
3.5	0.012	0.01	0.008	0.007	0.011	0.01	0.011	0.009	0.013	0.011	0.01	0.01	0.009	0.009	0.011	0.016	0.012	0.009	0.011	0.01	0.014	0.008	0.008	0.009	0.013	0.012	0.012	0.005	0.005	0.008	0.006	0.009	0.007
3.75	0.013	0.01	0.009	0.01	0.015	0.013	0.012	0.01	0.014	0.013	0.01	0.01	0.01	0.01	0.012	0.019	0.016	0.009	0.013	0.012	0.017	0.01	0.009	0.01	0.016	0.013	0.014	0.005	0.005	0.008	0.007	0.009	0.008
4	0.012	0.01	0.008	0.012	0.017	0.015	0.012	0.009	0.016	0.013	0.011	0.011	0.01	0.01	0.012	0.02	0.018	0.009	0.013	0.012	0.019	0.011	0.009	0.009	0.017	0.012	0.016	0.006	0.005	0.008	0.007	0.01	0.009
4.25	0.012	0.01	0.008	0.014	0.019	0.018	0.013	0.01	0.018	0.015	0.013	0.013	0.01	0.01	0.012	0.022	0.021	0.009	0.015	0.014	0.021	0.013	0.01	0.009	0.019	0.012	0.017	0.007	0.006	0.009	0.008	0.011	0.01
4.5	0.012	0.01	0.008	0.017	0.022	0.02	0.014	0.011	0.02	0.017	0.014	0.014	0.01	0.01	0.012	0.023	0.023	0.009	0.017	0.016	0.022	0.014	0.011	0.008	0.021	0.011	0.019	0.008	0.007	0.01	0.009	0.012	0.011
4.75	0.013	0.01	0.009	0.019	0.024	0.022	0.015	0.013	0.022	0.019	0.017	0.017	0.01	0.01	0.013	0.026	0.026	0.009	0.019	0.018	0.024	0.016	0.013	0.009	0.023	0.012	0.021	0.009	0.008	0.011	0.01	0.013	0.012
5	0.013	0.011	0.009	0.021	0.027	0.025	0.016	0.015	0.024	0.021	0.019	0.019	0.011	0.011	0.013	0.027	0.028	0.009	0.021	0.021	0.027	0.019	0.015	0.009	0.026	0.012	0.023	0.01	0.009	0.011	0.011	0.013	0.013
5.25	0.013	0.011	0.009	0.024	0.029	0.026	0.017	0.016	0.026	0.023	0.02	0.02	0.011	0.011	0.013	0.029	0.03	0.009	0.022	0.023	0.028	0.02	0.017	0.01	0.027	0.012	0.024	0.012	0.01	0.013	0.012	0.015	0.015
5.5	0.014	0.012	0.01	0.026	0.032	0.029	0.019	0.019	0.029	0.026	0.022	0.022	0.013	0.012	0.014	0.031	0.033	0.01	0.025	0.026	0.031	0.023	0.019	0.011	0.03	0.013	0.027	0.014	0.012	0.015	0.014	0.016	0.017
5.75	0.014	0.012	0.01	0.028	0.033	0.03	0.019	0.019	0.03	0.027	0.023	0.023	0.013	0.012	0.014	0.032	0.034	0.01	0.026	0.027	0.032	0.024	0.021	0.011	0.031	0.013	0.028	0.016	0.013	0.016	0.016	0.018	0.019
6	0.014	0.012	0.01	0.029	0.035	0.032	0.02	0.021	0.031	0.028	0.025	0.025	0.013	0.012	0.014	0.034	0.035	0.01	0.027	0.029	0.034	0.026	0.023	0.011	0.033	0.014	0.029	0.02	0.015	0.018	0.018	0.02	0.022
6.25	0.016	0.013	0.011	0.032	0.038	0.034	0.022	0.023	0.034	0.031	0.027	0.027	0.015	0.013	0.016	0.036	0.038	0.011	0.03	0.032	0.036	0.029	0.026	0.012	0.036	0.016	0.032	0.023	0.019	0.021	0.021	0.023	0.026
6.5	0.016	0.013	0.012	0.034	0.04	0.036	0.023	0.025	0.036	0.032	0.028	0.028	0.016	0.014	0.016	0.038	0.04	0.011	0.032	0.034	0.038	0.03	0.028	0.012	0.038	0.016	0.034	0.027	0.022	0.025	0.024	0.026	0.029
6.75	0.016	0.013	0.011	0.035	0.042	0.037	0.024	0.026	0.037	0.033	0.029	0.029	0.016	0.014	0.017	0.039	0.041	0.01	0.033	0.035	0.039	0.032	0.029	0.012	0.04	0.017	0.036	0.032	0.026	0.028	0.027	0.029	0.033
7	0.017	0.014	0.012	0.038	0.044	0.039	0.026	0.028	0.039	0.035	0.032	0.032	0.018	0.015	0.019	0.041	0.043	0.011	0.035	0.038	0.041	0.034	0.032	0.013	0.043	0.018	0.037	0.038	0.031	0.033	0.032	0.033	0.039
7.25	0.017	0.014	0.012	0.039	0.046	0.041	0.028	0.03	0.041	0.037	0.033	0.033	0.02	0.016	0.021	0.041	0.044	0.011	0.037	0.04	0.044	0.036	0.033	0.013	0.045	0.019	0.039	0.044	0.036	0.038	0.036	0.038	0.044
7.5	0.018	0.015	0.013	0.041	0.048	0.043	0.03	0.032	0.043	0.039	0.035	0.035	0.022	0.017	0.024	0.043	0.046	0.011	0.04	0.043	0.046	0.039	0.036	0.014	0.049	0.021	0.042	0.052	0.042	0.044	0.041	0.043	0.05
7.75	0.018	0.015	0.013	0.042	0.05	0.044	0.031	0.034	0.045	0.04	0.036	0.036	0.024	0.019	0.026	0.044	0.048	0.011	0.042	0.045	0.048	0.041	0.038	0.014	0.052	0.022	0.045	0.061	0.049	0.052	0.048	0.049	0.058
8	0.019	0.016	0.013	0.044	0.052	0.046	0.033	0.036	0.047	0.042	0.037	0.037	0.026	0.021	0.028	0.045	0.05	0.011	0.045	0.048	0.051	0.043	0.04	0.015	0.054	0.023	0.048	0.071	0.058	0.06	0.054	0.055	0.066
8.25	0.019	0.016	0.014	0.045	0.054	0.048	0.035	0.037	0.049	0.043	0.039	0.039	0.029	0.025	0.031	0.046	0.052	0.011	0.048	0.051	0.053	0.045	0.043	0.017	0.057	0.026	0.051	0.083	0.067	0.069	0.063	0.063	0.076
8.5	0.02	0.017	0.015	0.047	0.056	0.05	0.036	0.039	0.051	0.044	0.04	0.04	0.031	0.028	0.034	0.048	0.052	0.012	0.051	0.055	0.054	0.048	0.045	0.017	0.061	0.028	0.054	0.096	0.078	0.079	0.072	0.072	0.087
8.75	0.021	0.017	0.015	0.049	0.057	0.052	0.038	0.041	0.054	0.046	0.041	0.041	0.034	0.031	0.037	0.049	0.055	0.012	0.055	0.059	0.058	0.05	0.047	0.018	0.065	0.031	0.057	0.109	0.089	0.09	0.082	0.082	0.099
9	0.021	0.018	0.016	0.051	0.057	0.053	0.04	0.043	0.055	0.048	0.043	0.043	0.036	0.035	0.039	0.051	0.056	0.012	0.058	0.062	0.061	0.052	0.051	0.019	0.068	0.033	0.061	0.125	0.102	0.103	0.094	0.093	0.113
9.25	0.022	0.019	0.017	0.053	0.059	0.055	0.042	0.044	0.058	0.049	0.044	0.044	0.039	0.038	0.042	0.052	0.058	0.013	0.063	0.067	0.066	0.055	0.053	0.02	0.073	0.036	0.064	0.142	0.117	0.117	0.107	0.106	0.128
9.5	0.022	0.019	0.017	0.054	0.06	0.057	0.043	0.046	0.059	0.048	0.046	0.046	0.042	0.042	0.046	0.053	0.059	0.013	0.067	0.071	0.069	0.057	0.055	0.021	0.076	0.039	0.068	0.161	0.133	0.134	0.122	0.12	0.145
9.75	0.024	0.02	0.018	0.056	0.063	0.059	0.045	0.048	0.062	0.05	0.047	0.047	0.046	0.046	0.05	0.055	0.062	0.014	0.073	0.076	0.074	0.06	0.059	0.023	0.081	0.043	0.072	0.182	0.15	0.151	0.138	0.136	0.164
10	0.024	0.021	0.018	0.058	0.064	0.06	0.046	0.049	0.063	0.05	0.049	0.049	0.049	0.05	0.053	0.056	0.064	0.015	0.079	0.082	0.078	0.063	0.06	0.024	0.084	0.045	0.076	0.204	0.169	0.17	0.156	0.153	0.185
10.25	0.025	0.021	0.019	0.059	0.066	0.062	0.047	0.051	0.064	0.051	0.05	0.05	0.052	0.053	0.056	0.057	0.066	0.015	0.085	0.087	0.083	0.065	0.061	0.024	0.087	0.048	0.079	0.227	0.19	0.191	0.176	0.173	0.208
10.5	0.025	0.021	0.019	0.061	0.067	0.063	0.049	0.051	0.065	0.052	0.051	0.051	0.055	0.056	0.059	0.058	0.068	0.016	0.091	0.093	0.087	0.068	0.064	0.025	0.09	0.05	0.083	0.252	0.213	0.213	0.198	0.195	0.234
10.75	0.026	0.022	0.02	0.063	0.068	0.065	0.05	0.053	0.066	0.053	0.052	0.052	0.058	0.058	0.062	0.06	0.07	0.016	0.097	0.099	0.092	0.071	0.067	0.026	0.092	0.053	0.087	0.279	0.238	0.237	0.222	0.218	0.264
11	0.027	0.023	0.02	0.065	0.07	0.065	0.051	0.054	0.068	0.054	0.053	0.053	0.061	0.062	0.065	0.061	0.072	0.017	0.105	0.106	0.098	0.074	0.069	0.028	0.096	0.056	0.09	0.306	0.264	0.263	0.249	0.245	0.296
11.25	0.027	0.024	0.021	0.066	0.072	0.067	0.052	0.055	0.069	0.055	0.055	0.055	0.065	0.064	0.067	0.063	0.071	0.018	0.112	0.113	0.103	0.076	0.071	0.029	0.098	0.059	0.092	0.333	0.291	0.291	0.279	0.274	0.33
11.5	0.028	0.024	0.021	0.066	0.073	0.068	0.053	0.056	0.07	0.056	0.056	0.056	0.068	0.067	0.07	0.064	0.071	0.018	0.119	0.119	0.109	0.078	0.075	0.03	0.101	0.061	0.096	0.359	0.319	0.319	0.313	0.306	0.367
11.75	0.028	0.025	0.022	0.067	0.075	0.069	0.055	0.057	0.072	0.056	0.057	0.057	0.071	0.069	0.073	0.066	0.073	0.019	0.128	0.127	0.115	0.081	0.077	0.032	0.104	0.064	0.099	0.387	0.347	0.347	0.348	0.342	0.408
12	0.029	0.025	0.023	0.069	0.076	0.07	0.056	0.058	0.073	0.058	0.058	0.058	0.074	0.071	0.076	0.067	0.074	0.02	0.136	0.134	0.121	0.084	0.079	0.033	0.107	0.066	0.102	0.415	0.376	0.377	0.386	0.378	0.451
12.25	0.03	0.026	0.024	0.072	0.077	0.072	0.058	0.06	0.075	0.059	0.059	0.059	0.078	0.074	0.079	0.069	0.074	0.021	0.145	0.142	0.128	0.087	0.082	0.035	0.111	0.069	0.105	0.44	0.404	0.406	0.428	0.42	0.498
12.5	0.031	0.027	0.024	0.073	0.079	0.072	0.059	0.061	0.076	0.06	0.06	0.06	0.08	0.076	0.081	0.071	0.076	0.021	0.154	0.15	0.136	0.09	0.084	0.037	0.114	0.071	0.108	0.464	0.431	0.434	0.472	0.463	0.545
12.75	0.032	0.028	0.025	0.075	0.081	0.074	0.06	0.063	0.077	0.061	0.061	0.061	0.082	0.077	0.084	0.074	0.077	0.023	0.164	0.158	0.143	0.093	0.088	0.039	0.116	0.074	0.111	0.487	0.459	0.463	0.52	0.509	0.596
13	0.032	0.028	0.025	0.075	0.082	0.075	0.061	0.063	0.075	0.061	0.062	0.062	0.085	0.079	0.086	0.075	0.078	0.023	0.173	0.166	0.15	0.096	0.09	0.04	0.118	0.076	0.113	0.509	0.485	0.49	0.567	0.557	0.649
13.25	0.033	0.029	0.026	0.076	0.084	0.076	0.062	0.064	0.076	0.063	0.063	0.063	0.087	0.081	0.088	0.076	0.08	0.024	0.184	0.174	0.158	0.099	0.093	0.042	0.121	0.078	0.116	0.529	0.509	0.515	0.618	0.607	0.703
13.5	0.034	0.029	0.027	0.077	0.085	0.076	0.063	0.065	0.077	0.064	0.064	0.064	0.09	0.083	0.09	0.078	0.082	0.025	0.194	0.184	0.166	0.102	0.096	0.044	0.124	0.081	0.119	0.547	0.533	0.539	0.671	0.659	0.758
13.75	0.034	0.029	0.027	0.077	0.087	0.077	0.064	0.066	0.077	0.064	0.064	0.064	0.092	0.085	0.092	0.08	0.083	0.026	0.205	0.193	0.175	0.104	0.098	0.046	0.127	0.083	0.121	0.564	0.554	0.56	0.725	0.712	0.813
14	0.035	0.03	0.028	0.079	0.088	0.078	0.066	0.066	0.079	0.065	0.066	0.066	0.094	0.087	0.095	0.082	0.084	0.027	0.215	0.202	0.182	0.109	0.101	0.048	0.13	0.085	0.124	0.579	0.574	0.582	0.778	0.766	0.865
14.25	0.036	0.031	0.029	0.081	0.09	0.079	0.067	0.067	0.08	0.066	0.067	0.067	0.097	0.089	0.097	0.084	0.086	0.029	0.227	0.212	0.191	0.112	0.106	0.05	0.132	0.087	0.127	0.594	0.593	0.602	0.83	0.818	0.918
14.5	0.037	0.033	0.03	0.082	0.093	0.081	0.069	0.069	0.082	0.068	0.069	0.069	0.1	0.092	0.1	0.088	0.088	0.031	0.24	0.224	0.202	0.117	0.11	0.054	0.134	0.091	0.13	0.607	0.609	0.62	0.883	0.871	0.97
14.75	0.037	0.033	0.031	0.084	0.094	0.082	0.07	0.07	0.083	0.069	0.069	0.069	0.102	0.094	0.101	0.09	0.09	0.031	0.252	0.235	0.21	0.12	0.113	0.056	0.136	0.093	0.133	0.619	0.626	0.636	0.933	0.921	1.02
15	0.038	0.033	0.031	0.084	0.095	0.082	0.07	0.071	0.083	0.069	0.07	0.07	0.104	0.095	0.103	0.092	0.091	0.033	0.264	0.245	0.219	0.123	0.116	0.058	0.138	0.094	0.135	0.63	0.641	0.652	0.981	0.97	1.066
15.25	0.039	0.034	0.032	0.087	0.097	0.083	0.071	0.072	0.085	0.071	0.071	0.071	0.107	0.098	0.105	0.095	0.094	0.034	0.277	0.257	0.231	0.126	0.12	0.062	0.142	0.097	0.138	0.64	0.655	0.667	1.027	1.018	1.109
15.5	0.04	0.035	0.033	0.088	0.099	0.084	0.073	0.073	0.086	0.072	0.072	0.072	0.109	0.1	0.108	0.098	0.096	0.036	0.291	0.267	0.241	0.131	0.125	0.065	0.144	0.099	0.141	0.649	0.668	0.68	1.071	1.063	1.15
15.75	0.041	0.036	0.034	0.09	0.1	0.085	0.074	0.075	0.087	0.073	0.074	0.074	0.112	0.102	0.11	0.101	0.098	0.038	0.304	0.279	0.253	0.135	0.128	0.068	0.147	0.102	0.144	0.658	0.679	0.692	1.113	1.106	1.188
16	0.041	0.037	0.034	0.091	0.101	0.086	0.075	0.075	0.086	0.073	0.074	0.074	0.113	0.104	0.111	0.104	0.099	0.04	0.318	0.292	0.265	0.137	0.131	0.071	0.147	0.104	0.146	0.668	0.69	0.704	1.152	1.145	1.224
16.25	0.043	0.038	0.035	0.093	0.104	0.087	0.076	0.077	0.087	0.074	0.075	0.075	0.116	0.106	0.113	0.106	0.102	0.042	0.331	0.303	0.274	0.142	0.136	0.075	0.15	0.107	0.149	0.676	0.7	0.714	1.189	1.183	1.257
16.5	0.044	0.039	0.037	0.094	0.106	0.088	0.078	0.078	0.089	0.076	0.076	0.076	0.119	0.107	0.116	0.11	0.105	0.045	0.346	0.317	0.287	0.146	0.141	0.079	0.153	0.109	0.152	0.683	0.71	0.724	1.223	1.217	1.287
16.75	0.045	0.04	0.038	0.096	0.107	0.089	0.079	0.079	0.09	0.077	0.077	0.077	0.121	0.109	0.117	0.114	0.107	0.047	0.362	0.332	0.3	0.15	0.145	0.083	0.155	0.112	0.155	0.691	0.718	0.735	1.255	1.25	1.316
17	0.046	0.041	0.039	0.098	0.109	0.09	0.08	0.08	0.091	0.078	0.078	0.078	0.124	0.111	0.119	0.117	0.109	0.049	0.377	0.346	0.312	0.153	0.15	0.087	0.158	0.114	0.158	0.698	0.728	0.742	1.285	1.279	1.342
17.25	0.047	0.042	0.04	0.098	0.11	0.091	0.081	0.081	0.091	0.079	0.078	0.078	0.126	0.113	0.121	0.12	0.111	0.05	0.394	0.359	0.326	0.159	0.154	0.091	0.161	0.117	0.16	0.704	0.735	0.752	1.312	1.307	1.366
17.5	0.049	0.043	0.041	0.1	0.113	0.092	0.083	0.083	0.093	0.081	0.079	0.079	0.128	0.115	0.124	0.124	0.114	0.053	0.41	0.375	0.338	0.163	0.159	0.095	0.163	0.12	0.163	0.711	0.743	0.761	1.336	1.332	1.386
17.75	0.05	0.044	0.042	0.101	0.114	0.091	0.083	0.084	0.094	0.082	0.079	0.079	0.13	0.117	0.126	0.127	0.116	0.055	0.425	0.39	0.352	0.166	0.162	0.099	0.166	0.12	0.166	0.717	0.752	0.77	1.359	1.355	1.405
18	0.051	0.046	0.044	0.103	0.117	0.093	0.085	0.085	0.095	0.084	0.08	0.08	0.133	0.12	0.128	0.13	0.119	0.057	0.443	0.406	0.367	0.17	0.167	0.103	0.168	0.123	0.169	0.723	0.759	0.777	1.378	1.374	1.418
18.25	0.052	0.047	0.045	0.104	0.118	0.093	0.086	0.086	0.096	0.085	0.081	0.081	0.134	0.121	0.129	0.134	0.122	0.059	0.46	0.424	0.383	0.173	0.171	0.108	0.17	0.126	0.172	0.728	0.766	0.784	1.394	1.391	1.429
18.5	0.054	0.048	0.046	0.106	0.12	0.094	0.087	0.088	0.097	0.087	0.082	0.082	0.137	0.124	0.132	0.138	0.124	0.061	0.477	0.438	0.398	0.178	0.177	0.113	0.173	0.129	0.175	0.734	0.774	0.791	1.406	1.403	1.437
18.75	0.055	0.049	0.047	0.107	0.122	0.095	0.088	0.089	0.098	0.087	0.082	0.082	0.139	0.125	0.133	0.142	0.126	0.063	0.494	0.455	0.415	0.181	0.181	0.118	0.175	0.132	0.177	0.74	0.78	0.8	1.415	1.413	1.443
19	0.056	0.051	0.048	0.109	0.124	0.096	0.083	0.09	0.099	0.089	0.083	0.083	0.142	0.127	0.135	0.145	0.13	0.066	0.511	0.471	0.43	0.187	0.186	0.123	0.177	0.136	0.18	0.746	0.786	0.807	1.422	1.42	1.448
19.25	0.058	0.053	0.05	0.111	0.127	0.098	0.082	0.092	0.1	0.091	0.085	0.085	0.145	0.129	0.137	0.149	0.133	0.068	0.528	0.488	0.451	0.191	0.191	0.128	0.18	0.139	0.183	0.751	0.792	0.814	1.428	1.425	1.451
19.5	0.059	0.054	0.051	0.113	0.129	0.099	0.083	0.093	0.101	0.093	0.085	0.085	0.147	0.131	0.138	0.153	0.136	0.07	0.547	0.504	0.465	0.193	0.195	0.133	0.182	0.14	0.186	0.758	0.797	0.821	1.431	1.429	1.453
19.75	0.06	0.055	0.052	0.114	0.131	0.099	0.084	0.094	0.102	0.095	0.086	0.086	0.149	0.133	0.14	0.158	0.139	0.073	0.566	0.523	0.484	0.197	0.202	0.139	0.185	0.143	0.188	0.763	0.805	0.829	1.434	1.433	1.455
20	0.062	0.056	0.053	0.116	0.127	0.101	0.085	0.095	0.103	0.095	0.087	0.087	0.151	0.135	0.142	0.162	0.141	0.075	0.583	0.539	0.505	0.201	0.205	0.145	0.187	0.146	0.191	0.768	0.812	0.835	1.436	1.435	1.455
20.25	0.063	0.058	0.054	0.117	0.128	0.102	0.086	0.097	0.104	0.097	0.082	0.082	0.156	0.137	0.144	0.165	0.144	0.077	0.601	0.558	0.522	0.206	0.213	0.15	0.19	0.15	0.194	0.774	0.818	0.842	1.437	1.436	1.456
20.5	0.065	0.059	0.055	0.119	0.13	0.103	0.087	0.098	0.105	0.099	0.083	0.083	0.161	0.139	0.145	0.169	0.146	0.08	0.621	0.575	0.541	0.209	0.216	0.155	0.192	0.152	0.197	0.781	0.826	0.85	1.438	1.437	1.455
20.75	0.067	0.06	0.057	0.121	0.133	0.104	0.089	0.1	0.106	0.1	0.083	0.083	0.165	0.141	0.147	0.173	0.15	0.083	0.639	0.593	0.56	0.214	0.226	0.163	0.195	0.156	0.201	0.787	0.832	0.857	1.438	1.438	1.455
21	0.068	0.062	0.058	0.123	0.135	0.106	0.091	0.101	0.108	0.104	0.084	0.084	0.167	0.143	0.149	0.177	0.152	0.086	0.659	0.612	0.58	0.221	0.232	0.169	0.199	0.16	0.204	0.792	0.838	0.864	1.439	1.438	1.455
21.25	0.07	0.063	0.059	0.125	0.138	0.107	0.092	0.103	0.108	0.105	0.085	0.085	0.17	0.145	0.151	0.181	0.155	0.09	0.679	0.633	0.602	0.225	0.234	0.175	0.2	0.163	0.207	0.798	0.846	0.871	1.439	1.438	1.455
21.5	0.071	0.065	0.061	0.127	0.14	0.109	0.094	0.105	0.11	0.108	0.084	0.084	0.173	0.147	0.152	0.184	0.158	0.093	0.698	0.651	0.62	0.231	0.243	0.182	0.203	0.168	0.21	0.806	0.853	0.88	1.439	1.438	1.456
21.75	0.073	0.067	0.063	0.129	0.142	0.11	0.094	0.105	0.111	0.109	0.085	0.085	0.176	0.148	0.154	0.188	0.16	0.096	0.718	0.671	0.641	0.233	0.248	0.188	0.206	0.171	0.213	0.811	0.86	0.887	1.439	1.438	1.455
22	0.074	0.068	0.064	0.125	0.144	0.11	0.096	0.106	0.112	0.11	0.085	0.085	0.178	0.149	0.155	0.191	0.163	0.099	0.738	0.691	0.663	0.238	0.252	0.196	0.208	0.175	0.216	0.818	0.867	0.895	1.439	1.438	1.455
22.25	0.076	0.069	0.065	0.128	0.144	0.112	0.098	0.108	0.113	0.113	0.085	0.085	0.18	0.151	0.157	0.194	0.165	0.102	0.755	0.706	0.682	0.245	0.262	0.204	0.211	0.179	0.22	0.824	0.873	0.902	1.439	1.438	1.454
22.5	0.078	0.071	0.067	0.129	0.146	0.113	0.099	0.11	0.115	0.115	0.086	0.086	0.183	0.153	0.158	0.198	0.169	0.104	0.776	0.728	0.702	0.249	0.268	0.211	0.213	0.183	0.223	0.829	0.879	0.909	1.44	1.438	1.455
22.75	0.08	0.072	0.068	0.131	0.149	0.114	0.101	0.111	0.116	0.117	0.087	0.087	0.186	0.154	0.159	0.202	0.171	0.107	0.794	0.746	0.722	0.255	0.273	0.217	0.216	0.186	0.227	0.834	0.888	0.935	1.44	1.438	1.454
23	0.081	0.074	0.069	0.132	0.152	0.116	0.102	0.113	0.118	0.12	0.086	0.086	0.189	0.155	0.161	0.207	0.174	0.11	0.812	0.765	0.741	0.26	0.283	0.226	0.218	0.19	0.23	0.842	0.895	0.924	1.44	1.438	1.455
23.25	0.084	0.076	0.072	0.136	0.155	0.118	0.105	0.115	0.12	0.123	0.088	0.088	0.192	0.157	0.163	0.212	0.178	0.113	0.83	0.785	0.762	0.266	0.288	0.234	0.222	0.195	0.237	0.848	0.899	0.936	1.44	1.438	1.455
23.5	0.086	0.078	0.073	0.138	0.158	0.12	0.11	0.117	0.122	0.126	0.089	0.089	0.195	0.159	0.165	0.216	0.181	0.116	0.852	0.803	0.783	0.274	0.295	0.244	0.225	0.2	0.24	0.855	0.907	0.941	1.44	1.439	1.454
23.75	0.087	0.079	0.074	0.139	0.159	0.121	0.111	0.118	0.123	0.128	0.089	0.089	0.198	0.16	0.165	0.217	0.183	0.118	0.868	0.822	0.803	0.277	0.304	0.252	0.228	0.203	0.244	0.862	0.916	0.964	1.44	1.438	1.455
24	0.089	0.081	0.075	0.141	0.161	0.122	0.113	0.12	0.124	0.13	0.089	0.089	0.2	0.162	0.166	0.221	0.186	0.122	0.886	0.839	0.821	0.283	0.311	0.26	0.231	0.208	0.248	0.866	0.932	0.954	1.44	1.438	1.454
24.25	0.091	0.082	0.076	0.136	0.167	0.128	0.113	0.121	0.127	0.133	0.09	0.09	0.204	0.162	0.168	0.223	0.19	0.125	0.903	0.857	0.843	0.289	0.318	0.27	0.232	0.212	0.252	0.873	0.937	0.984	1.44	1.438	1.453
24.5	0.093	0.084	0.078	0.139	0.171	0.131	0.116	0.117	0.129	0.137	0.091	0.091	0.207	0.165	0.17	0.228	0.193	0.129	0.922	0.876	0.862	0.297	0.324	0.278	0.236	0.217	0.257	0.878	0.937	0.971	1.44	1.438	1.454
24.75	0.095	0.086	0.08	0.137	0.174	0.13	0.118	0.12	0.131	0.14	0.092	0.092	0.21	0.167	0.172	0.231	0.196	0.131	0.939	0.895	0.882	0.303	0.335	0.287	0.238	0.221	0.261	0.883	0.941	0.986	1.44	1.438	1.453
25	0.097	0.088	0.082	0.14	0.177	0.132	0.121	0.121	0.134	0.143	0.093	0.093	0.213	0.169	0.175	0.235	0.198	0.133	0.953	0.913	0.9	0.31	0.34	0.297	0.242	0.226	0.266	0.888	0.949	0.989	1.44	1.437	1.453
25.25	0.098	0.09	0.083	0.142	0.177	0.134	0.123	0.123	0.134	0.147	0.094	0.094	0.216	0.171	0.176	0.238	0.201	0.136	0.97	0.928	0.917	0.319	0.349	0.305	0.244	0.229	0.271	0.895	0.957	1.025	1.44	1.437	1.453
25.5	0.101	0.092	0.085	0.144	0.181	0.137	0.125	0.125	0.137	0.151	0.095	0.095	0.22	0.174	0.179	0.243	0.204	0.139	0.986	0.947	0.936	0.326	0.356	0.314	0.248	0.234	0.276	0.901	0.966	1.029	1.44	1.438	1.453
25.75	0.102	0.093	0.086	0.147	0.184	0.139	0.127	0.127	0.138	0.155	0.095	0.095	0.221	0.175	0.18	0.244	0.206	0.142	1	0.961	0.953	0.332	0.364	0.323	0.251	0.238	0.282	0.906	0.975	1.039	1.439	1.438	1.453
26	0.105	0.095	0.089	0.151	0.188	0.142	0.13	0.129	0.139	0.16	0.097	0.097	0.225	0.177	0.181	0.249	0.209	0.146	1.015	0.976	0.972	0.341	0.373	0.333	0.255	0.244	0.287	0.911	0.985	1.04	1.44	1.437	1.453
26.25	0.106	0.097	0.09	0.153	0.19	0.143	0.131	0.131	0.141	0.163	0.097	0.097	0.227	0.179	0.181	0.253	0.212	0.148	1.03	0.991	0.987	0.346	0.378	0.344	0.258	0.249	0.291	0.918	0.992	1.062	1.439	1.437	1.453
26.5	0.109	0.099	0.092	0.156	0.195	0.146	0.134	0.133	0.144	0.169	0.099	0.099	0.231	0.181	0.183	0.258	0.215	0.152	1.044	1.006	1.003	0.357	0.388	0.355	0.262	0.256	0.295	0.923	1.003	1.069	1.439	1.437	1.453
26.75	0.111	0.101	0.094	0.159	0.198	0.148	0.136	0.134	0.142	0.171	0.099	0.099	0.234	0.183	0.185	0.262	0.218	0.154	1.056	1.022	1.019	0.365	0.4	0.363	0.265	0.26	0.301	0.927	1.019	1.083	1.44	1.437	1.453
27	0.113	0.103	0.095	0.161	0.204	0.152	0.135	0.136	0.144	0.177	0.101	0.101	0.239	0.185	0.186	0.266	0.221	0.156	1.071	1.035	1.032	0.375	0.407	0.374	0.269	0.264	0.306	0.933	1.028	1.098	1.439	1.437	1.452
27.25	0.116	0.105	0.097	0.164	0.207	0.154	0.133	0.138	0.146	0.181	0.102	0.102	0.244	0.187	0.188	0.271	0.224	0.159	1.082	1.049	1.046	0.383	0.417	0.383	0.274	0.27	0.312	0.94	1.03	1.11	1.439	1.437	1.452
27.5	0.118	0.107	0.099	0.167	0.211	0.157	0.134	0.14	0.148	0.185	0.103	0.103	0.248	0.189	0.19	0.276	0.227	0.162	1.093	1.061	1.059	0.39	0.426	0.392	0.278	0.277	0.32	0.948	1.043	1.114	1.439	1.437	1.452
27.75	0.12	0.11	0.101	0.169	0.212	0.16	0.134	0.142	0.149	0.191	0.104	0.104	0.251	0.19	0.191	0.281	0.229	0.165	1.105	1.074	1.072	0.398	0.435	0.402	0.281	0.284	0.327	0.951	1.051	1.121	1.439	1.436	1.452
28	0.122	0.111	0.102	0.171	0.217	0.161	0.135	0.143	0.151	0.196	0.105	0.105	0.254	0.192	0.193	0.287	0.232	0.167	1.117	1.084	1.082	0.406	0.444	0.412	0.285	0.29	0.333	0.965	1.059	1.14	1.439	1.437	1.452
28.25	0.125	0.114	0.104	0.175	0.221	0.165	0.138	0.146	0.153	0.2	0.107	0.107	0.258	0.194	0.195	0.292	0.235	0.171	1.127	1.095	1.094	0.415	0.453	0.422	0.29	0.297	0.34	0.968	1.077	1.146	1.439	1.437	1.452
28.5	0.127	0.116	0.106	0.177	0.227	0.168	0.14	0.148	0.156	0.208	0.109	0.109	0.261	0.197	0.197	0.296	0.238	0.174	1.139	1.107	1.106	0.425	0.464	0.432	0.295	0.304	0.346	0.978	1.082	1.175	1.439	1.436	1.452
28.75	0.13	0.118	0.108	0.181	0.225	0.171	0.141	0.15	0.158	0.213	0.11	0.11	0.264	0.198	0.199	0.301	0.242	0.177	1.147	1.117	1.117	0.434	0.472	0.443	0.3	0.313	0.353	0.977	1.107	1.183	1.439	1.436	1.451
29	0.131	0.12	0.11	0.182	0.229	0.174	0.144	0.152	0.16	0.216	0.111	0.111	0.267	0.2	0.2	0.304	0.245	0.18	1.157	1.127	1.127	0.438	0.478	0.454	0.305	0.32	0.36	0.988	1.125	1.186	1.438	1.436	1.451
29.25	0.134	0.122	0.112	0.184	0.232	0.177	0.146	0.154	0.162	0.226	0.113	0.113	0.271	0.202	0.202	0.309	0.248	0.184	1.164	1.137	1.135	0.45	0.488	0.463	0.311	0.328	0.366	0.992	1.129	1.194	1.439	1.436	1.451
29.5	0.136	0.125	0.113	0.187	0.236	0.181	0.149	0.157	0.165	0.232	0.115	0.115	0.275	0.204	0.204	0.313	0.252	0.188	1.174	1.148	1.145	0.458	0.499	0.472	0.317	0.336	0.372	0.993	1.141	1.207	1.438	1.436	1.451
29.75	0.139	0.128	0.115	0.191	0.242	0.186	0.151	0.16	0.167	0.238	0.117	0.117	0.279	0.207	0.206	0.319	0.256	0.192	1.184	1.157	1.156	0.467	0.511	0.48	0.322	0.345	0.379	0.994	1.148	1.209	1.438	1.436	1.45
30	0.141	0.129	0.117	0.194	0.244	0.189	0.152	0.161	0.169	0.244	0.118	0.118	0.282	0.208	0.207	0.323	0.258	0.195	1.191	1.166	1.162	0.474	0.521	0.488	0.327	0.351	0.386	1.006	1.157	1.211	1.438	1.436	1.45
30.25	0.144	0.132	0.119	0.197	0.248	0.194	0.155	0.164	0.172	0.25	0.121	0.121	0.287	0.21	0.209	0.323	0.261	0.199	1.199	1.175	1.17	0.482	0.53	0.501	0.333	0.361	0.395	1.009	1.171	1.225	1.439	1.436	1.451
30.5	0.146	0.134	0.12	0.199	0.254	0.197	0.156	0.166	0.174	0.257	0.122	0.122	0.29	0.212	0.21	0.328	0.264	0.2	1.206	1.184	1.178	0.49	0.54	0.508	0.339	0.369	0.405	1.01	1.183	1.243	1.438	1.436	1.45
30.75	0.149	0.136	0.124	0.202	0.258	0.201	0.158	0.169	0.176	0.262	0.125	0.125	0.294	0.214	0.212	0.333	0.267	0.203	1.214	1.192	1.185	0.498	0.551	0.517	0.345	0.379	0.415	1.004	1.175	1.242	1.438	1.436	1.45
31	0.152	0.139	0.125	0.205	0.264	0.205	0.161	0.171	0.178	0.27	0.127	0.127	0.298	0.216	0.213	0.338	0.27	0.207	1.221	1.2	1.19	0.506	0.56	0.526	0.352	0.387	0.424	1.008	1.181	1.245	1.438	1.436	1.45
31.25	0.154	0.14	0.126	0.208	0.267	0.199	0.163	0.173	0.18	0.278	0.128	0.128	0.301	0.217	0.214	0.342	0.272	0.209	1.227	1.206	1.196	0.514	0.568	0.535	0.358	0.396	0.433	1.012	1.178	1.249	1.438	1.436	1.45
31.5	0.157	0.143	0.129	0.212	0.271	0.204	0.166	0.177	0.183	0.283	0.131	0.131	0.304	0.219	0.216	0.346	0.276	0.212	1.235	1.212	1.204	0.522	0.578	0.544	0.365	0.406	0.444	1.016	1.203	1.241	1.438	1.436	1.45
31.75	0.159	0.144	0.13	0.215	0.278	0.207	0.167	0.178	0.185	0.291	0.133	0.133	0.308	0.22	0.216	0.35	0.279	0.214	1.24	1.219	1.209	0.529	0.587	0.552	0.371	0.414	0.455	1.024	1.213	1.262	1.438	1.436	1.45
32	0.163	0.147	0.133	0.219	0.282	0.209	0.169	0.181	0.187	0.294	0.136	0.136	0.312	0.222	0.218	0.355	0.282	0.217	1.247	1.226	1.216	0.533	0.596	0.56	0.376	0.425	0.465	1.029	1.219	1.249	1.438	1.436	1.449
32.25	0.166	0.148	0.134	0.223	0.288	0.215	0.172	0.183	0.19	0.305	0.138	0.138	0.316	0.224	0.219	0.36	0.284	0.22	1.253	1.233	1.223	0.541	0.606	0.57	0.382	0.434	0.475	1.031	1.232	1.253	1.438	1.435	1.449
32.5	0.169	0.151	0.137	0.227	0.291	0.219	0.173	0.186	0.192	0.314	0.141	0.141	0.32	0.225	0.22	0.366	0.288	0.222	1.259	1.24	1.23	0.548	0.617	0.578	0.389	0.444	0.486	1.034	1.235	1.256	1.438	1.436	1.45
32.75	0.172	0.153	0.139	0.231	0.299	0.223	0.176	0.189	0.188	0.32	0.143	0.143	0.329	0.227	0.222	0.371	0.286	0.226	1.265	1.245	1.235	0.556	0.626	0.585	0.397	0.457	0.497	1.041	1.248	1.274	1.438	1.436	1.449
33	0.176	0.155	0.141	0.234	0.304	0.228	0.178	0.192	0.191	0.328	0.146	0.146	0.332	0.228	0.223	0.376	0.29	0.228	1.268	1.251	1.239	0.564	0.634	0.594	0.403	0.467	0.508	1.048	1.251	1.266	1.437	1.436	1.449
33.25	0.179	0.158	0.143	0.238	0.304	0.234	0.187	0.195	0.194	0.336	0.149	0.149	0.336	0.229	0.225	0.379	0.292	0.232	1.273	1.256	1.245	0.572	0.643	0.605	0.412	0.478	0.522	1.047	1.262	1.286	1.438	1.436	1.449
33.5	0.182	0.16	0.145	0.244	0.31	0.241	0.187	0.198	0.197	0.341	0.152	0.152	0.341	0.231	0.226	0.385	0.295	0.234	1.278	1.262	1.25	0.579	0.653	0.611	0.419	0.49	0.531	1.053	1.268	1.29	1.437	1.436	1.448
33.75	0.186	0.162	0.148	0.248	0.317	0.246	0.189	0.201	0.2	0.351	0.155	0.155	0.345	0.232	0.227	0.39	0.298	0.238	1.283	1.267	1.256	0.586	0.661	0.623	0.428	0.502	0.543	1.053	1.277	1.299	1.437	1.435	1.449
34	0.189	0.165	0.15	0.252	0.321	0.253	0.191	0.204	0.203	0.364	0.159	0.159	0.352	0.234	0.228	0.393	0.301	0.24	1.287	1.272	1.26	0.594	0.669	0.629	0.438	0.513	0.555	1.061	1.276	1.297	1.437	1.436	1.448
34.25	0.192	0.167	0.152	0.256	0.325	0.26	0.193	0.207	0.207	0.37	0.162	0.162	0.357	0.236	0.23	0.399	0.303	0.242	1.291	1.278	1.266	0.601	0.678	0.635	0.446	0.524	0.568	1.067	1.28	1.312	1.437	1.436	1.449
34.5	0.198	0.169	0.154	0.26	0.334	0.267	0.196	0.21	0.21	0.383	0.165	0.165	0.364	0.238	0.231	0.402	0.305	0.246	1.296	1.283	1.27	0.611	0.685	0.642	0.455	0.539	0.579	1.073	1.286	1.308	1.437	1.435	1.448
34.75	0.202	0.172	0.156	0.267	0.335	0.275	0.198	0.214	0.213	0.389	0.169	0.169	0.37	0.239	0.232	0.407	0.308	0.249	1.299	1.287	1.274	0.615	0.694	0.652	0.463	0.549	0.59	1.068	1.286	1.313	1.437	1.435	1.448
35	0.206	0.174	0.158	0.27	0.346	0.282	0.201	0.216	0.217	0.403	0.172	0.172	0.376	0.241	0.233	0.411	0.312	0.249	1.304	1.291	1.277	0.622	0.702	0.659	0.47	0.564	0.603	1.076	1.301	1.33	1.437	1.436	1.449
35.25	0.21	0.176	0.161	0.275	0.35	0.29	0.203	0.219	0.221	0.416	0.177	0.177	0.383	0.242	0.235	0.415	0.315	0.254	1.308	1.296	1.283	0.631	0.711	0.666	0.48	0.586	0.617	1.078	1.3	1.331	1.437	1.435	1.448
35.5	0.215	0.178	0.163	0.28	0.356	0.298	0.206	0.223	0.225	0.422	0.181	0.181	0.388	0.244	0.236	0.42	0.318	0.254	1.31	1.3	1.287	0.637	0.72	0.673	0.488	0.588	0.632	1.081	1.306	1.33	1.437	1.435	1.448
35.75	0.22	0.18	0.165	0.285	0.364	0.306	0.209	0.225	0.229	0.435	0.184	0.184	0.396	0.245	0.237	0.425	0.321	0.258	1.313	1.305	1.291	0.643	0.728	0.679	0.497	0.619	0.645	1.086	1.316	1.35	1.436	1.436	1.448
36	0.226	0.183	0.168	0.29	0.37	0.312	0.211	0.229	0.234	0.446	0.188	0.188	0.403	0.247	0.238	0.418	0.325	0.26	1.316	1.309	1.296	0.651	0.735	0.686	0.508	0.643	0.655	1.089	1.32	1.35	1.437	1.435	1.448

## Sheet: Growthcurver YPAD
Supplementary file 3: Growth curve raw data and analysis
GrowthCurveR summary statistics for YPAD
	carrying capacity	population size at start	growth rate of the population	Inflection point	fastest doubling time	area under logistical curve	area under emperical curve	goodness-of-fit of the model
sample	k	n0	r	t_mid	t_gen	auc_l	auc_e	sigma
SC5314 Biol 1	1.34818	5.49273e-06	0.862617	14.3874	0.80354	29.1377	29.1851	0.00739958
SC5314 Biol 2	1.37027	1.42153e-05	0.806791	14.2245	0.85914	29.8382	29.8848	0.00863463
SC5314 Biol 3	1.37582	1.63838e-05	0.807621	14.0391	0.858258	30.2143	30.2401	0.00514648
AMS4702 Biol 1	1.36549	2.50695e-05	0.668403	16.3155	1.03702	26.879	26.9032	0.00474901
AMS4702 Biol 2	1.45728	0.000326322	0.54489	15.4233	1.27209	29.9855	30.1244	0.0126535
AMS4702 Biol 3	1.39012	2.12329e-05	0.659837	16.8062	1.05048	26.6817	26.8483	0.0147302
P75016 Biol 1	1.37598	0.000108032	0.767706	12.3122	0.902881	32.5938	32.5765	0.00497748
P75016 Biol 2	1.41985	0.000202956	0.722659	12.2505	0.959162	33.7205	33.674	0.00814126
P75016 Biol 3	1.44529	0.000292035	0.708355	12.0092	0.978531	34.6733	34.6739	0.00490663
AMS4397 Biol 1	1.42428	2.39828e-05	0.517474	21.2413	1.33948	21.0218	21.1274	0.0202582
AMS4397 Biol 2	1.44453	2.42975e-05	0.516301	21.2916	1.34252	21.2481	21.754	0.0346896
AMS4397 Biol 3	1.37739	3.65156e-05	0.475376	22.1676	1.4581	19.0567	19.5953	0.0401997
P75063 Biol 1	1.40338	0.000139727	0.701907	13.128	0.98752	32.0979	32.0859	0.00585742
P75063 Biol 2	1.43094	9.44816e-05	0.708993	13.5761	0.97765	32.087	32.0806	0.00632257
P75063 Biol 3	1.45401	0.000261953	0.657879	13.105	1.05361	33.2892	33.2942	0.00595096
AMS4104 Biol 1	1.29055	9.11e-05	0.407931	23.4318	1.69918	16.2384	16.2673	0.0221694
AMS4104 Biol 2	1.6184	0.00213029	0.331205	20.0227	2.0928	25.8758	25.866	0.0190609
AMS4104 Biol 3	1.38578	0.000247372	0.361818	23.8537	1.91574	16.8783	17.4193	0.042174
AMS4105 Biol 1	1.4499	2.91958e-05	0.693843	15.5842	0.998997	29.6009	29.6339	0.00826425
AMS4105 Biol 2	1.50616	8.97967e-05	0.634595	15.3286	1.09227	31.1343	31.222	0.00954726
AMS4105 Biol 3	1.5429	0.000279431	0.591439	14.5683	1.17197	33.0667	33.1655	0.0100264
AMS4106 Biol 1	1.46059	0.000531557	0.521727	15.1769	1.32856	30.4132	30.2832	0.0196953
AMS4106 Biol 2	1.52356	0.00152653	0.457546	15.0909	1.51492	31.853	31.8279	0.0138947
AMS4106 Biol 3	1.48993	0.00157111	0.454397	15.0829	1.52542	31.1617	31.072	0.0189627
AMS4107 Biol 1	1.42596	0.000190435	0.689432	12.9395	1.00539	32.883	32.886	0.00711919
AMS4107 Biol 2	1.47261	0.000248498	0.66568	13.0497	1.04126	33.7964	33.7971	0.00651483
AMS4107 Biol 3	1.50781	0.000473739	0.637292	12.6554	1.08764	35.1986	35.2148	0.00577749
P78042 Biol 1	1.57599	0.000131471	0.579151	16.216	1.19683	31.1791	31.1964	0.00868908
P78042 Biol 2	1.55597	0.000111965	0.573095	16.6453	1.20948	30.1151	30.1423	0.0112614
P78042 Biol 3	1.56876	0.000179814	0.580952	15.6188	1.19312	31.973	31.967	0.00759612
AMS4444 Biol 1	1.32971	2.85934e-05	0.623819	17.2282	1.11113	24.961	24.9739	0.00902437
AMS4444 Biol 2	1.42761	0.000191154	0.535798	16.6449	1.29367	27.6312	27.8176	0.0162351
AMS4444 Biol 3	1.46074	0.000273985	0.516884	16.6018	1.34101	28.3353	28.5105	0.0150032

## Sheet: Growthcurver 1ug FLC
Supplementary file 3: Growth curve raw data and analysis
GrowthCurveR summary statistics for YPAD + 1ug/ml FLC
	carrying capacity	population size at start	growth rate of the population	Inflection point	fastest doubling time	area under logistical curve	area under emperical curve	goodness-of-fit of the model
sample	k	n0	r	t_mid	t_gen	auc_l	auc_e	sigma
SC5314	0.235434	0.00275374	0.15004	29.5702	4.61976	2.00196	1.98125	0.00204155
SC5314	0.214588	0.00293538	0.14577	29.3484	4.75508	1.8804	1.85875	0.00227485
AMS4702	0.507755	0.0184603	0.0935021	35.051	7.41317	3.80924	3.7615	0.0111486
AMS4702	0.805439	0.0199312	0.0946308	38.825	7.32476	4.62449	4.57737	0.0103227
AMS4702	514832	0.0199724	0.0738295	231.141	9.38849	3.58866	3.553	0.0111384
P75016	0.275481	0.0120003	0.109147	28.3018	6.35061	2.91388	2.87688	0.00800132
P75016	0.312678	0.0128631	0.106469	29.575	6.51035	3.08529	3.04375	0.00855004
P75016	0.295499	0.0158797	0.101872	28.1567	6.80407	3.2348	3.19563	0.00964524
AMS4397	1.12405e+07	0.0110726	0.101689	203.939	6.81636	4.12599	4.12312	0.00737172
AMS4397	0.357775	0.0161615	0.0786487	38.7934	8.81321	2.47055	2.43725	0.011057
AMS4397	0.357775	0.0161615	0.0786487	38.7934	8.81321	2.47055	2.43725	0.011057
P75063	0.462546	0.0124303	0.135429	26.5037	5.11816	5.13283	5.03963	0.0133109
P75063	0.235622	0.00790306	0.172696	19.4612	4.01369	3.92662	3.85838	0.0101595
P75063	0.218934	0.00733318	0.187659	17.917	3.69365	3.95779	3.89125	0.00986461
AMS4104	0.513072	0.0112515	0.142255	26.6966	4.87255	5.54463	5.49825	0.00630497
AMS4104	0.377182	0.0135727	0.132456	24.8235	5.23304	4.69502	4.65712	0.00666936
AMS4104	0.280017	0.00160809	0.196739	26.1973	3.52318	2.92988	2.89288	0.00361195
AMS4105	1.32977	0.00808909	0.240366	21.2016	2.88371	19.8003	19.6669	0.0104136
AMS4105	1.33351	0.00831259	0.232491	21.8139	2.9814	19.0895	18.9779	0.00846078
AMS4105	1.31712	0.00605338	0.243659	22.0717	2.84474	18.4988	18.4545	0.00566905
AMS4106	0.894957	0.0141199	0.14029	29.4624	4.94081	7.89427	7.81738	0.00998702
AMS4106	1.01056	0.0123736	0.147776	29.7097	4.69054	8.54763	8.4695	0.00833271
AMS4106	0.792104	0.00260275	0.20576	27.7743	3.36872	7.15334	7.09912	0.00393851
AMS4107	0.930058	0.0270207	0.0976577	35.9333	7.09772	6.35159	6.259	0.0190129
AMS4107	2.44845	0.013758	0.112625	45.9574	6.15446	6.00861	5.91812	0.0121495
AMS4107	2.63209	0.0255137	0.0963227	48.0321	7.1961	7.19194	7.09375	0.01772
P78042	0.989994	0.0179539	0.281704	14.1695	2.46055	21.5553	21.2164	0.0586044
P78042	1.21217	0.0320782	0.218814	16.476	3.16775	23.5946	23.1191	0.0795332
P78042	1.25747	0.0306101	0.222585	16.5819	3.11408	24.353	23.8874	0.0746599
AMS4444	1.44128	0.000346862	0.608262	13.6979	1.13955	32.1431	32.1781	0.0109672
AMS4444	1.43859	0.000333481	0.608851	13.7461	1.13845	32.0137	32.062	0.0114378
AMS4444	1.45452	0.000389326	0.617637	13.3177	1.12226	32.9913	33.035	0.0120873
