# Supplementary material for: Expandable and reversible copy number amplification drives rapid adaptation to antifungal drugs
Source: eLife. 2020 Jul 20;9:e58349. doi: 10.7554/eLife.58349 (PMC7371428; doi:10.7554/eLife.58349)
Supplement: Supplementary file 4. [file elife-58349-supp4.xlsx]

## Sheet: AMS4107
Supplementary file 4: Coding Sequences within Complex CNVs
Isolate	Chromosome
AMS4107	Chr1
CNV copy number	ORF ID	Standard Name	Alias	Feature Type	Chromosome	Start Position	Stop Position	Strand	Primary CGD ID	Description
5.64	orf19.4824		orf19.12287|IPF22463.1|IPF11480.2|Contig4-3078_0040|orf6.7387|CA4755|CaO19.12287|CaO19.4824|IPF11480	ORF|Uncharacterized	Ca21chr1_C_albicans_SC5314	2117999	2118817	W	CAL0005335	Planktonic growth-induced gene
5.64	orf19.4825		CaO19.4825|FMC1|orf19.12288|IPF22489.1|IPF11479.1|Contig4-3078_0039|orf6.7386|CA4754|CaO19.12288|IPF11479	ORF|Uncharacterized	Ca21chr1_C_albicans_SC5314	2119345	2118881	C	CAL0005336	Mitochondrial matrix protein; required for assembly/stability of the F1 sector of mitochondrial F1F0 ATP synthase at high temperature; rat catheter biofilm repressed
5.64	orf19.4826	IDH1	orf19.12289|IPF22447.1|IPF11475.1|Contig4-3078_0035|orf6.7385|CA4753|IDH1.3	ORF|Uncharacterized	Ca21chr1_C_albicans_SC5314	2120442	2121755	W	CAL0005337	Putative mitochondrial NAD-isocitrate dehydrogenase subunit 1; soluble protein in hyphae; protein level decrease in stationary phase cultures
5.64	orf19.4827	ADE12	orf19.12290|IPF22437.1|IPF11474.1|Contig4-3078_0033|orf6.7384|CA4752|CaO19.12290|CaO19.4827	ORF|Uncharacterized	Ca21chr1_C_albicans_SC5314	2122303	2123589	W	CAL0005339	Adenylosuccinate synthase; upregulated in biofilm; decreased expression in hyphae vs yeast-form cells; not induced during GCN response, in contrast to S. cerevisiae ADE12, which is induced by Gcn4p; stationary phase-enriched protein
5.64	orf19.4828		orf19.12291|IPF22426.1|IPF11473.2|Contig4-3078_0031|orf6.7383|CA4751|IPF11473|CaO19.4828|CaO19.12291	ORF|Uncharacterized	Ca21chr1_C_albicans_SC5314	2124372	2125967	W	CAL0005341	WD repeat domain protein; Hap43-repressed gene; flow model biofilm induced
5.64	orf19.4829	DOA1	orf19.12292|IPF22371.1|IPF4477.2|Contig4-3078_0030|orf6.7382|CA4750|IPF4477|CaO19.4829|CaO19.12292	ORF|Verified	Ca21chr1_C_albicans_SC5314	2126419	2128704	W	CAL0005343	WD repeat protein; required for ubiquitin-mediated protein degradation; role in control of cellular ubiquitin levels; may promote efficient NHEJ in postdiauxic/stationary phase; Spider biofilm repressed
5.64	orf19.4830		orf19.12293|IPF22516.1|IPF4478.1|Contig4-3078_0029|orf6.7381|CaO19.12293|CaO19.4830	ORF|Uncharacterized	Ca21chr1_C_albicans_SC5314	2129071	2128739	C	CAL0005351	Protein of unknown function
5.64	orf19.4831	MTS1	orf19.12294|IPF22422.1|IPF4481.1|Contig4-3078_0026|orf6.7380|CA4749|CaO19.12294|CFA1|IPF4481|CaO19.4831	ORF|Verified	Ca21chr1_C_albicans_SC5314	2129818	2131359	W	CAL0005352	Sphingolipid C9-methyltransferase; catalyzes methylation of the 9th carbon in the long chain base component of glucosylceramides; glucosylceramide biosynthesis is important for virulence; Spider biofilm repressed
5.64	orf19.4833	MLS1	orf19.12296|IPF22415.1|IPF4483.1|Contig4-3078_0024|orf6.7378|CA4748|CaO19.4833|CaO19.12296	ORF|Verified	Ca21chr1_C_albicans_SC5314	2132388	2134043	W	CAL0005353	Malate synthase; glyoxylate cycle enzyme; no mammalian homolog; regulated upon white-opaque switch; phagocytosis, strong oxidative stress induced; stationary phase enriched; flow model biofilm repressed; rat catheter, Spider biofilm induced
5.64	orf19.4834		CaO19.12297|orf19.12297|IPF22473.1|IPF4484.1|Contig4-3078_0022|Contig4-3078_0023|orf6.7377|CA4747|IPF4484|CaO19.4834	ORF|Uncharacterized	Ca21chr1_C_albicans_SC5314	2134295	2134999	W	CAL0005355	Protein of unknown function
5.64	orf19.4835		orf19.12298|IPF22416.1|IPF4485.1|Contig4-3078_0021|orf6.7376|CA4746|CaO19.4835|IPF4485|CaO19.12298	ORF|Uncharacterized	Ca21chr1_C_albicans_SC5314	2136601	2135018	C	CAL0005357	Protein of unknown function
5.64	orf19.4836	URA1	orf19.12299|IPF22436.1|IPF4487.2|Contig4-3078_0020|orf6.7375|CA4745|CaO19.12299|CaO19.4836	ORF|Verified	Ca21chr1_C_albicans_SC5314	2137047	2138381	W	CAL0005359	Dihydroorotate dehydrogenase; de novo pyrimidine biosynthesis; regulated by yeast-hypha switch, Nrg1/Mig1/Tup1; flow model biofilm induced; rat catheter and Spider biofilm repressed
5.64	orf19.4837	DAM1	orf19.12300|IPF22462.1|IPF4489.2|Contig4-3078_0019|orf6.7374|CA4744|CaO19.4837|IPF4489|CaO19.12300	ORF|Verified	Ca21chr1_C_albicans_SC5314	2138563	2139396	W	CAL0005362	Essential subunit of the Dam1 (DASH) complex, which acts in chromosome segregation by coupling kinetochores to spindle microtubules
5.64	orf19.4837.1			ORF|Uncharacterized	Ca21chr1_C_albicans_SC5314	2139635	2139417	C	CAL0120796	Protein of unknown function
5.64	orf19.4839		orf19.12302|IPF22455.1|IPF4491.1|Contig4-3078_0017|orf6.7372|CA4743|CaO19.4839|CaO19.12302|IPF4491	ORF|Uncharacterized	Ca21chr1_C_albicans_SC5314	2139855	2140751	W	CAL0005366	GET complex subunit; expression downregulated in an ssr1 null mutant
5.64	orf19.4841	SHY1	orf19.12304|IPF22446.1|IPF4494.1|Contig4-3078_0016|orf6.7370|CA4742|CaO19.4841|CaO19.12304	ORF|Verified	Ca21chr1_C_albicans_SC5314	2141907	2140828	C	CAL0005374	Cytochrome c oxidase biosynthesis protein; transcript regulated by Nrg1 and Mig1
5.64	orf19.4842		orf19.12305|IPF22509.1|IPF4495.1|Contig4-3078_0014|orf6.7369|CaO19.12305|CaO19.4842	ORF|Uncharacterized	Ca21chr1_C_albicans_SC5314	2142338	2142679	W	CAL0005375	Protein of unknown function; Spider biofilm induced
5.64	orf19.4843		orf19.12306|IPF22381.1|IPF4496.1|Contig4-3078_0013|orf6.7368|CA4741|CaO19.12306|IPF4496|CaO19.4843	ORF|Uncharacterized	Ca21chr1_C_albicans_SC5314	2144968	2142773	C	CAL0005376	Putative iron/copper reductas; involved in iron homeostasis; rat catheter and Spider biofilm induced
5.64	orf19.4844		orf19.12307|IPF22442.1|IPF4497.2|Contig4-3078_0012|orf6.7367|CA4740|IPF4497|CaO19.12307|CaO19.4844	ORF|Uncharacterized	Ca21chr1_C_albicans_SC5314	2146676	2145531	C	CAL0005378	Protein of unknown function
5.64	orf19.4845	TVP18	orf19.12308|IPF22486.1|IPF4498.2|Contig4-3078_0010|orf6.7366|CA4739|CaO19.4845|IPF4498|CaO19.12308	ORF|Uncharacterized	Ca21chr1_C_albicans_SC5314	2147583	2147062	C	CAL0005379	Putative integral membrane protein; fluconazole-induced
5.64	orf19.4846		orf19.12309|IPF4500|IPF22439.1|IPF4500.1|Contig4-3078_0008|orf6.7365|CA4738|CaO19.12309|CaO19.4846	ORF|Uncharacterized	Ca21chr1_C_albicans_SC5314	2148256	2149497	W	CAL0005381	GlcNAc-induced protein
5.64	orf19.4847		IPF22481.1|IPF4499.1|orf6.7364	ORF|Uncharacterized	Ca21chr1_C_albicans_SC5314	2148905	2148453	C	CAF0007022	Protein of unknown function
5.64	orf19.4848	SKI3	CaO19.4848|orf19.12311|IPF22503.1|IPF4502.1|Contig4-3078_0006|orf6.7363|CA4737|CaO19.12311	ORF|Uncharacterized	Ca21chr1_C_albicans_SC5314	2149827	2154029	W	CAL0005384	Protein of unknown function
5.64	orf19.4849		orf19.12312|IPF22448.1|IPF4503.2|Contig4-3078_0005|orf6.7362|CA4736|STS1|CaO19.12312|IPF4503|CaO19.4849	ORF|Uncharacterized	Ca21chr1_C_albicans_SC5314	2155073	2154090	C	CAL0005386	Protein required for localizing proteasomes to the nucleus; involved in ubiquitin-mediated protein degradation; possibly an essential gene, disruptants not obtained by UAU1 method; Spider biofilm induced
5.64	orf19.4850		orf19.12313|IPF22396.1|IPF7726.2|Contig4-2920_0017|Contig4-3078_0001|orf6.7361|CA4735|CaO19.4850|IPF7726|CaO19.12313	ORF|Uncharacterized	Ca21chr1_C_albicans_SC5314	2157940	2156090	C	CAL0005398	Protein of unknown function
5.64	orf19.4851	TFA1	CaO19.12314|orf19.12314|IPF22440.1|IPF7729.1|Contig4-2920_0015|orf6.7360|CA4734|CaO19.4851	ORF|Uncharacterized	Ca21chr1_C_albicans_SC5314	2159971	2158787	C	CAL0005399	Protein with polyglutamate motifs and abundant Ser/Thr residues; described as a subunit of TFIIE, which is a basal transcription initiation factor of RNA Polymerase II; possibly an essential gene, disruptants not obtained by UAU1 method
5.64	orf19.4853	HCM1	orf19.12316|orf6.7358|IPF22406.1|IPF7732.2|Contig4-2920_0014|CA4733|CaO19.4853|CaO19.12316|IPF7732	ORF|Uncharacterized	Ca21chr1_C_albicans_SC5314	2161492	2163231	W	CAL0005400	Protein with forkhead domain; similar to S. cerevisiae Hcm1p; Hap43p-induced gene
5.64	orf19.4855	BUD31	orf19.12318|IPF22484.1|IPF7733.1|Contig4-2920_0013|orf6.7356|CA4732|CaO19.4855|CaO19.12318|IPF7733	ORF|Uncharacterized	Ca21chr1_C_albicans_SC5314	2164013	2163561	C	CAL0005402	Bud31 ortholog; not subject to mating-type regulation, in contrast to S. cerevisiae Bud31 which has a role in specifying the bud site; Spider biofilm induced
5.64	tS(CGA)1	tS(CGA)1	tS(CGA)1.2	tRNA|Uncharacterized	Ca21chr1_C_albicans_SC5314	2164386	2164292	C	CAF0007231	tRNA-Ser, predicted by tRNAscan-SE; CGA anticodon
5.64	orf19.4856	LIP3	orf19.12319|IPF22432.1|IPF7736.2|Contig4-2920_0010|orf6.7355|CA4731|CaO19.4856|CaO19.12319	ORF|Uncharacterized	Ca21chr1_C_albicans_SC5314	2166143	2167558	W	CAL0005403	Secreted lipase; gene family member whose members are expressed differentially in response to carbon source and infection; possible role in nutrition and/or in creating an acidic microenvironment; flow model biofilm induced
5.64	orf19.4857		orf19.12320|IPF7737.2|IPF28260.1|Contig4-2920_0009|orf6.7354|CA4730|CaO19.12320|IPF7737|CaO19.4857	ORF|Uncharacterized	Ca21chr1_C_albicans_SC5314	2168519	2167701	C	CAL0005405	Protein with a dual-specificity phosphatase domain; Hap43-induced gene
9.02	orf19.4858	VPS41	orf19.12321|IPF12249.2|IPF12250.3|IPF28261.1|IPF28247.1|Contig4-2920_0005|Contig4-2920_0006|orf6.7353|orf6.7352|CA4729|orf19.12322|orf19.4859|orf19.12323|orf19.4860|orf6.687|CA4728|IPF12252.2|IPF28264.1|VAM2|VPS41.5f	ORF|Verified	Ca21chr1_C_albicans_SC5314	2169829	2172714	W	CAL0005408	Protein similar to S. cerevisiae Vps41p, which is involved in vacuole organization and biogenesis; transposon mutation affects filamentous growth; regulated by Gcn4p; induced in response to amino acid starvation (3-aminotriazole treatment)
9.02	orf19.4861		orf19.12324|IPF12253.1|IPF19185.1|Contig4-2920_0002|orf6.688|orf6.7351|CA4727|CaO19.4861|IPF12253	ORF|Uncharacterized	Ca21chr1_C_albicans_SC5314	2173072	2173884	W	CAL0005430	Protein of unknown function; rat catheter biofilm repressed
9.02	orf19.4861.1		IPF12254.2|IPF19184.1|orf6.7350	ORF|Uncharacterized	Ca21chr1_C_albicans_SC5314	2173946	2174230	W	CAF0007023	Protein of unknown function
9.02	orf19.4862		CaO19.4862|orf19.12326|IPF12255.2|IPF16153.2|Contig4-1868_0003|orf6.689|orf6.7349|CA4726|IPF12255	ORF|Uncharacterized	Ca21chr1_C_albicans_SC5314	2174808	2174212	C	CAL0005431	Putative integral membrane protein; S. cerevisiae ortholog Tvp23 localizes to late Golgi vesicles; rat catheter biofilm induced
9.02	orf19.4862.2	PET100	IPF16152.1|IPF12257.1|Contig4-1868_0004|CA4725	ORF|Verified	Ca21chr1_C_albicans_SC5314	2175074	2175498	W	CAF0007024	Chaperone that facilitates the assembly of cytochrome c oxidase; plasma membrane protein
9.02	orf19.4863	PDC2	orf19.12327|IPF16151.2|IPF12258.2|Contig4-2286_0003|Contig4-2286_0005|orf6.442|orf6.690|orf6.7348|CA4724|CTA5|CaO19.4863	ORF|Uncharacterized	Ca21chr1_C_albicans_SC5314	2178173	2175663	C	CAL0005432	Homeodomain-like transcription factor; regulator of pyruvate decarboxylase; contains a putative C-terminal activation domain, Glu- and Pro-rich; complements glucose utilization defect of S. cerevisiae pdc2 mutant
9.02	orf19.4864		orf19.12328|IPF18177.1|IPF16983.2|Contig4-2286_0002|orf6.441|orf6.7347|CA4723|YJU3|CaO19.4864|IPF18177	ORF|Uncharacterized	Ca21chr1_C_albicans_SC5314	2179911	2178997	C	CAL0005433	Protein of unknown function
9.02	orf19.4865		orf19.12329|IPF15617.2|IPF16984.3|Contig4-2255_0013|orf6.440|orf6.7346|CA4722|CaO19.4865|SAC1	ORF|Uncharacterized	Ca21chr1_C_albicans_SC5314	2181078	2182934	W	CAL0005434	Protein of unknown function
9.02	orf19.4866	CPP1	CaO19.4866|orf19.12330|IPF15616.2|IPF19180.2|Contig4-2255_0001|orf6.707|orf6.7345|CA4721	ORF|Verified	Ca21chr1_C_albicans_SC5314	2185137	2183344	C	CAL0005436	VH1 family MAPK phosphatase; regulates Cst20-Hst7-Cek1-Cph1 filamentation pathway; represses yeast-hyphal switch; required for virulence in mice; yeast-enriched; induced by alpha pheromone in SpiderM medium; Spider biofilm induced
9.02	orf19.4867	SWE1	CaO19.4867|orf19.12331|IPF10223.3|IPF28274.1|Contig4-1510_0001|Contig4-1510_0003|Contig4-2622_0001|orf6.2582|orf6.706|CA1200|IPF10223|IPF10223.2	ORF|Verified	Ca21chr1_C_albicans_SC5314	2192696	2189160	C	CAL0005438	Putative protein kinase with a role in control of growth and morphogenesis, required for full virulence; mutant cells are small, rounded, and sometimes binucleate; not required for filamentous growth; mutant is hypersensitive to caspofungin
9.02	orf19.4869	SFU1	orf19.12333|orf6.2584|IPF22421.1|IPF19906.1|Contig4-2622_0003|Contig4-2622_0004|CA1201|CaO19.12333|IPF19906|CaO19.4869	ORF|Verified	Ca21chr1_C_albicans_SC5314	2195405	2196958	W	CAL0005442	GATA-type transcription factor; regulator of iron-responsive genes; represses iron utilization genes if iron is present; Hap43-repressed; promotes gastrointestinal commensalism in mice; Spider biofilm induced
9.02	orf19.4870	DBP3	orf19.12334|IPF10215.2|IPF17356.3|Contig4-2619_0001|Contig4-2622_0005|orf6.2585|orf6.3829|CA1202|CaO19.4870	ORF|Uncharacterized	Ca21chr1_C_albicans_SC5314	2197121	2198815	W	CAL0005460	Putative ATP-dependent DEAD-box RNA helicase; Hap43-induced; repressed by prostaglandins; Spider biofilm induced
9.02	orf19.4871	ERO1	orf19.12335|IPF17353.3|IPF13354.2|Contig4-2619_0004|Contig4-2619_0005|orf6.2586|orf6.3830|CA2076|CaO19.4871	ORF|Uncharacterized	Ca21chr1_C_albicans_SC5314	2199912	2201654	W	CAL0005461	Ortholog of S. cerevisiae Ero1; role in formation of disulfide bonds in the endoplasmic reticulum; fluconazole-induced; induced by Mnl1 under weak acid stress; Spider biofilm induced
9.02	orf19.4872		orf19.12336|IPF13353|IPF22461.1|IPF13353.1|Contig4-2619_0009|orf6.3831|CA2077|CaO19.12336|CaO19.4872	ORF|Uncharacterized	Ca21chr1_C_albicans_SC5314	2202256	2203107	W	CAL0005462	Protein of unknown function; induced by Mnl1 under weak acid stress; Hap43-induced; mutant is viable
9.02	orf19.4873		orf19.12337|IPF17929.2|IPF13352.1|Contig4-2619_0010|orf6.113|orf6.3832|CA2078|CaO19.4873|IPF13352	ORF|Uncharacterized	Ca21chr1_C_albicans_SC5314	2204101	2203589	C	CAL0005463	Protein of unknown function; transcript regulated by white-opaque switch; flow model biofilm induced; Spider biofilm induced
9.02	orf19.4874	MNN23	orf19.12338|IPF22402.1|IPF13350.2|Contig4-2619_0014|Contig4-2619_0015|orf6.112|orf6.3833|CA2079|CaO19.4874|MNN3	ORF|Verified	Ca21chr1_C_albicans_SC5314	2207407	2205587	C	CAL0005465	Alpha-1,2-mannosyltransferase; mutants hypersensitive to toxic ergosterol analog, amphotericin B, calcofluor white, growth at 42 degrees and have decreased cell wall mannan; flow model biofilm induced
9.02	orf19.4875		CaO19.4875|CWC21|CaO19.12339|orf19.12339|IPF22483.1|IPF9693.2|orf6.3834|CA2080|IPF9693	ORF|Uncharacterized	Ca21chr1_C_albicans_SC5314	2208671	2209159	W	CAL0005467	Protein of unknown function
9.02	orf19.4878		orf19.12342|IPF22361.1|IPF9699.2|orf6.3837|CA2081|IPF9699|CaO19.12342|CaO19.4878	ORF|Uncharacterized	Ca21chr1_C_albicans_SC5314	2212048	2209502	C	CAL0005472	Protein of unknown function; Hap43-repressed; rat catheter biofilm repressed
9.02	orf19.4879.2	NTF2	IPF22508.1|IPF9700.2|Contig4-2738_0001|CA2082	ORF|Uncharacterized	Ca21chr1_C_albicans_SC5314	2212873	2212390	C	CAF0007025	Putative nuclear envelope protein; regulated by Ssn6; rat catheter biofilm repressed
9.02	orf19.4880		orf19.12344|IPF17533.2|orf6.3839|CA0598|orf6.1625|orf6.3840|IPF9703.2|orf19.4881|CA6291|Contig4-2738_0005|Contig4-2738_0006|IPF17532.3|IPF9703.5f|IPF9703|CaO19.4880|YFW5	ORF|Uncharacterized	Ca21chr1_C_albicans_SC5314	2214100	2216268	W	CAL0005494	Protein of unknown function; flow model biofilm induced
9.02	orf19.4882		orf19.12345|IPF9704.2|IPF28259.1|Contig4-2738_0007|orf6.1624|orf6.3841|CA0597|TFA2|CaO19.4882|IPF9704	ORF|Uncharacterized	Ca21chr1_C_albicans_SC5314	2217342	2216488	C	CAL0005496	TFIIE small subunit; involved in RNA polymerase II transcription initiation; Spider biofilm induced
9.02	snR10a			snoRNA|Uncharacterized	Ca21chr1_C_albicans_SC5314	2217768	2217868	W	CAL0126268	H/ACA box small nucleolar RNA (snoRNA)
9.02	orf19.4883		orf19.12346|IPF9706.2|IPF18549.2|Contig4-2738_0012|orf6.1623|orf6.3842|CA0596|IPF9706|CaO19.4883	ORF|Uncharacterized	Ca21chr1_C_albicans_SC5314	2220202	2217971	C	CAL0005497	Protein of unknown function; S. cerevisiae ortholog Cos111 confers resistance to the antifungal drug ciclopirox olamine; constitutive expression independent of MTL or white-opaque status; Spider biofilm induced
9.02	orf19.4884	WOR1	orf19.12348|IPF22376.1|IPF15255.2|Contig4-2464_0001|orf6.3050|CA1512|EAP2|TOS9|YEL007W|IPF15255|CaO19.4884|CaO19.12348	ORF|Verified	Ca21chr1_C_albicans_SC5314	2230537	2232894	W	CAL0005498	Transcription factor ("master switch") of white-opaque phenotypic switching; required to establish and maintain the opaque state; opaque-specific, nuclear; regulates its own expression; suggested role in regulation of adhesion factors
9.02	orf19.4885	MIR1	orf19.12349|IPF22456.1|IPF7536.2|Contig4-2934_0003|orf6.3051|CA1513|CaO19.4885|CaO19.12349	ORF|Verified	Ca21chr1_C_albicans_SC5314	2236380	2237303	W	CAL0005500	Putative mitochondrial phosphate transporter; caspofungin repressed; expression is increased in a fluconazole-resistant isolate; induced upon adherence to polystyrene
9.02	orf19.4886		orf19.12350|IPF22472.1|IPF7539.1|Contig4-2934_0006|orf6.3052|CA1514|CaO19.12350|CaO19.4886|IPF7539	ORF|Uncharacterized	Ca21chr1_C_albicans_SC5314	2239176	2239892	W	CAL0005502	Putative adhesin-like protein; Hap43-repressed; rat catheter and Spider biofilm induced
9.02	orf19.4887	ECM21	orf19.12352|IPF18663.2|IPF7541.3|Contig4-2934_0009|orf6.3053|orf6.3331|CA1707|ECM21.3|CaO19.4887|CA1515|IPF18663.1	ORF|Uncharacterized	Ca21chr1_C_albicans_SC5314	2242403	2240214	C	CAL0005504	Predicted regulator of endcytosis of plasma membrane proteins; fluconazole induced, alkaline induced by Rim101; repressed by caspofungin and in azole-resistant strain overexpressing MDR1; flow model, rat catheter and Spider biofilm induced
9.02	orf19.4888		orf19.12353|IPF22460.1|IPF7543.2|Contig4-2934_0015|orf6.3332|CA1708|CaO19.12353|YRA1|IPF7543|CaO19.4888	ORF|Uncharacterized	Ca21chr1_C_albicans_SC5314	2245436	2246269	W	CAL0005506	Protein of unknown function
9.02	orf19.4889		orf19.12354|IPF22405.1|IPF7544.2|Contig4-2934_0016|orf6.3333|CA1709|HOL1|CaO19.4889|HOL2|CaO19.12354	ORF|Uncharacterized	Ca21chr1_C_albicans_SC5314	2248267	2246513	C	CAL0005508	Predicted MFS family membrane transporter, member of the drug:proton antiporter (12 spanner) (DHA1) family; Spider biofilm induced
9.02	orf19.4890	CLA4	orf19.12355|IPF15972.3|IPF16297.2|Contig4-2934_0017|orf6.3334|orf6.53|CA1710|CaO19.4890	ORF|Verified	Ca21chr1_C_albicans_SC5314	2252473	2249543	C	CAL0005519	Ste20p family Ser/Thr kinase required for wild-type filamentous growth, organ colonization and virulence in mouse systemic infection; role in chlamydospore formation; functional homolog of S. cerevisiae Cla4p; mutant caspofungin sensitive
9.02	orf19.4892	TPK1	orf19.12357|IPF12285.2|IPF18622.2|Contig4-2955_0006|orf6.3336|orf6.4228|CA2355|TPK3|CaO19.4892	ORF|Verified	Ca21chr1_C_albicans_SC5314	2256855	2255638	C	CAL0005520	cAMP-dependent protein kinase catalytic subunit; Tpk2 isoform; control of morphogenesis and stress response; WT nuclear localization requires Bcy1; produced during stationary, not exponential growth; rat catheter and Spider biofilm induced
9.02	orf19.4893		CaO19.12358|orf19.12358|IPF12282|IPF22500.1|IPF12282.2|Contig4-2955_0011|Contig4-2955_0014|orf6.4229|CA2356|CaO19.4893	ORF|Uncharacterized	Ca21chr1_C_albicans_SC5314	2263716	2259391	C	CAL0005521	Protein of unknown function
9.02	orf19.4894		orf19.12359|IPF22469.1|IPF8957.2|IPF8957|Contig4-2955_0017|orf6.4230|CA2357|CaO19.12359|CaO19.4894	ORF|Uncharacterized	Ca21chr1_C_albicans_SC5314	2264847	2264113	C	CAL0005522	Protein with similarity to S. cerevisiae Yer010cp, a protein of unknown function belonging to the prokaryotic RraA family; repressed by benomyl; Hap43-induced; Spider biofilm induced
9.02	orf19.4895		orf19.12360|IPF22453.1|IPF8953.2|Contig4-2955_0019|Contig4-2955_0021|orf6.4231|CA2358|IPF8953|CaO19.12360|CaO19.4895	ORF|Uncharacterized	Ca21chr1_C_albicans_SC5314	2265944	2265123	C	CAL0005524	Protein of unknown function
9.02	orf19.4896	RPA34	CaO19.12361|orf19.12361|IPF22470.1|IPF8952.1|Contig4-2955_0022|orf6.4232|CA2359|IPF8952|CaO19.4896	ORF|Uncharacterized	Ca21chr1_C_albicans_SC5314	2267063	2266341	C	CAL0005526	Putative RNA polymerase I subunit; rat catheter biofilm induced
9.02	orf19.4897	SFH5	orf19.12362|IPF22451.1|IPF8951.2|Contig4-2955_0023|orf6.4233|CA2360|IPF8951|CaO19.4897|CaO19.12362	ORF|Uncharacterized	Ca21chr1_C_albicans_SC5314	2268407	2267445	C	CAL0005528	Putative phosphatidylinositol transporter; rat catheter and Spider biofilm repressed
9.02	orf19.4898		orf19.12363|IPF8950.1|IPF28258.1|Contig4-2955_0025|orf6.4234|CA2361|CaO19.12363|CaO19.4898|IPF8950	ORF|Uncharacterized	Ca21chr1_C_albicans_SC5314	2269357	2268668	C	CAL0005529	Putative protein of unknown function; induced by prostaglandins
5.58	orf19.4899	GCA1	orf19.12365|MP190|IPF22352.1|IPF8948.2|Contig4-2932_0006|Contig4-2955_0029|orf6.2026|orf6.4236|orf6.5799|orf6.649|CA0855|AMYG1|CaO19.4899	ORF|Verified	Ca21chr1_C_albicans_SC5314	2271539	2274379	W	CAL0005531	Extracellular/plasma membrane-associated glucoamylase; expressed in rat oral infection; regulated by carbohydrates, pH, galactose; promotes biofilm matrix formation; flow model biofilm induced; Bcr1 repressed in RPMI a/a biofilms
5.58	orf19.4900	MNN12	orf19.12366|IPF17635.3|IPF8854.2|Contig4-2409_0001|orf6.2025|orf6.4237|CA0854|CaO19.4900|IPF8854	ORF|Uncharacterized	Ca21chr1_C_albicans_SC5314	2276399	2278885	W	CAL0006195	Predicted alpha-1,3-mannosyltransferase activity with a role in protein glycosylation
5.58	orf19.4901		orf6.2023|orf6.1621|CA6292|orf19.4902|orf19.12367|IPF18850.1|Contig4-2409_0004|orf6.2024|CA0595|IPF8856.5f|IPF8856|IPF8856.2|CaO19.4901	ORF|Uncharacterized	Ca21chr1_C_albicans_SC5314	2280112	2281146	W	CAL0006196	Predicted methyltransferase; Spider biofilm induced
5.58	orf19.4903		orf19.12368|IPF8860.1|IPF28257.1|Contig4-2762_0010|orf6.1620|CA0594|CaO19.4903|IPF8860|CaO19.12368|GPI12	ORF|Uncharacterized	Ca21chr1_C_albicans_SC5314	2282361	2283422	W	CAL0006198	Protein of unknown function
5.58	orf19.4904		orf19.12369|IPF22430.1|IPF8861.2|Contig4-2762_0009|orf6.1619|CA0593|CaO19.4904|ARP6|CaO19.12369	ORF|Uncharacterized	Ca21chr1_C_albicans_SC5314	2284784	2283444	C	CAL0006200	Protein of unknown function
5.58	orf19.4905		orf19.12370|IPF8862.2|IPF28254.1|Contig4-2762_0006|orf6.1618|CA0592|CaO19.4905|IPF8862	ORF|Uncharacterized	Ca21chr1_C_albicans_SC5314	2285620	2287173	W	CAL0006202	Putative MFS transporter; Hap43p-induced gene; also regulated by regulated by Sef1p and Sfu1p; repressed in a ssr1 null mutant
5.58	orf19.4906		orf19.12372|IPF17082.3|IPF8866.2|Contig4-2762_0005|orf6.1617|orf6.430|orf6.699|CA0076|CaO19.4906|IPF8866	ORF|Uncharacterized	Ca21chr1_C_albicans_SC5314	2289577	2287271	C	CAL0006203	Putative adhesin-like protein; positively regulated by Tbf1; Spider biofilm induced
5.58	orf19.4907		orf19.12373|IPF22400.1|IPF17283.2|Contig4-2762_0012|orf6.3754|CA2021|CaO19.12373|IPF17283|CaO19.4907	ORF|Uncharacterized	Ca21chr1_C_albicans_SC5314	2294809	2292992	C	CAL0006205	Putative protein of unknown function; Hap43p-repressed gene; increased transcription is observed upon fluphenazine treatment; possibly transcriptionally regulated by Tac1p; induced by nitric oxide; fungal-specific (no human/murine homolog
5.58	orf19.4908		orf19.12374|IPF22515.1|IPF9610.2|Contig4-2018_0002|orf6.3755|CaO19.4908|CaO19.12374	ORF|Dubious	Ca21chr1_C_albicans_SC5314	2295578	2295913	W	CAL0006208	Dubious open reading frame
5.58	orf19.4909	CBK1	CaO19.12375|CaO19.4909|orf19.12375|IPF22379.1|IPF9611.2|Contig4-2855_0009|orf6.3756|CA2022	ORF|Verified	Ca21chr1_C_albicans_SC5314	2299136	2296938	C	CAL0006211	Ser/Thr kinase of cell wall integrity pathway; mutants show abnormal morphology and aggregation; Mob2p associated; required for wild-type hyphal growth and transcriptional regulation of cell-wall-associated genes
5.58	orf19.4909.1	RPL42	IPF22520.1|IPF9613.2|Contig4-2508_0008|CA2023|RPL42.3	ORF|Uncharacterized	Ca21chr1_C_albicans_SC5314	2300710	2300032	C	CAF0007026	Putative 60S ribosomal subunit protein; colony morphology-related gene regulation by Ssn6; Spider biofilm repressed
5.58	orf19.4910	FGR41	orf19.12376|IPF22465.1|IPF9616.1|Contig4-2508_0005|orf6.3757|CA2024|PGA35|CaO19.4910|CaO19.12376|IPF9616	ORF|Verified	Ca21chr1_C_albicans_SC5314	2302038	2301286	C	CAL0006224	Putative GPI-anchored adhesin-like protein; transposon mutation affects filamentous growth; Spider biofilm repressed
5.58	orf19.4911		orf19.12377|IPF17046.3|IPF9618.2|Contig4-2508_0004|orf6.3758|CA2025|orf19.8596|orf19.981|orf6.580|IPF26300.1|IPF29610.1|CaO19.4911|IPF9618|CaO19.12377	ORF|Uncharacterized	Ca21chr1_C_albicans_SC5314	2304212	2305174	W	CAL0006225	BED zinc finger protein; predicted DNA binding protein; Spider biofilm repressed
5.58	orf19.4912		orf19.12378|IPF22445.1|IPF9619.2|orf6.3759|orf19.8598|orf19.983|orf6.578|orf6.5815|CA0121|Contig4-2508_0003|IPF17048.2|IPF9924.2|CaO19.4912|CaO19.12378	ORF|Uncharacterized	Ca21chr1_C_albicans_SC5314	2307229	2305295	C	CAL0006226	Protein of unknown function
5.58	orf19.984	PHO8	orf19.8599|orf6.5814|IPF26293.1|IPF9926.2|Contig4-2694_0008|CA3530|CaO19.8599|IPF9926|CaO19.984	ORF|Uncharacterized	Ca21chr1_C_albicans_SC5314	2309139	2310647	W	CAL0003811	Putative repressible vacuolar alkaline phosphatase; Rim101-induced transcript; regulated by Tsa1, Tsa1B in minimal media at 37 deg; possibly adherence-induced
5.58	orf19.985		CaO19.985|orf19.8600|IPF9929.2|IPF18934.2|Contig4-2694_0006|orf6.1594|orf6.5813|CA3529|IPF9929	ORF|Uncharacterized	Ca21chr1_C_albicans_SC5314	2311282	2313795	W	CAL0003812	Protein of unknown function
5.58	orf19.986	GLY1	orf19.8601|IPF9931.1|IPF6766.1|Contig4-2262_0004|Contig4-2694_0002|orf6.1595|orf6.5812|CA3528|GLY1-1|GLY1-2|CaO19.986|GLY11	ORF|Verified	Ca21chr1_C_albicans_SC5314	2315247	2316368	W	CAL0003813	L-threonine aldolase; complements glycine auxotrophy of S. cerevisiae shm1 shm2 gly1-1 triple mutant; macrophage/pseudohyphal-induced; the GLY1 locus has an RFLP and is triploid in strain SGY269; flow model biofilm induced
5.58	orf19.988		orf19.8603|IPF9934.1|IPF6770.1|Contig4-2262_0003|Contig4-2694_0001|orf6.1597|orf6.5810|CA3527|CaO19.988|IPF9934	ORF|Uncharacterized	Ca21chr1_C_albicans_SC5314	2316720	2317952	W	CAL0003815	Protein of unknown function; oral infection upregulated gene; upregulated in strains from HIV+ patients with oral candidiasis; mutants have reduced ability to damage oral epithelial cells; transcript possibly regulated upon hyphal formation
5.58	orf19.989		orf19.990.1|orf19.8604|IPF9936.2|IPF6773.2|IPF20059.1|Contig4-2262_0002|orf6.5809|orf6.1598|CA6251|CA3526|MRPS5.5f|MRPS5.3f|MRPS5	ORF|Uncharacterized	Ca21chr1_C_albicans_SC5314	2318337	2319347	W	CAL0003817	Mitochondrial ribosomal protein of the small subunit; Spider biofilm repressed
5.58	orf19.991	DJP1	orf19.8606|orf6.5807|IPF6776.2|IPF18933.2|Contig4-2932_0022|CA3525|CaO19.991|CaO19.8606	ORF|Uncharacterized	Ca21chr1_C_albicans_SC5314	2319827	2321353	W	CAL0003840	Similar to bacterial DnaJ; reported to have a role in peroxisome biogenesis; induced in low iron and upon adherence to polystyrene
5.58	orf19.992	LKH1	orf19.8607|IPF26288.1|IPF6778.2|Contig4-2932_0021|orf6.5806|CA3524|LKH1.3|CaO19.992|CaO19.8607|LKH1.3f	ORF|Uncharacterized	Ca21chr1_C_albicans_SC5314	2321637	2323508	W	CAL0003842	Putative leukotriene A(4) hydrolase; repressed during the mating process; Hog1p-induced
5.58	orf19.993		orf19.8608|IPF26298.1|IPF20135.1|Contig4-2932_0019|orf6.5805|CA3523|DOP98|CaO19.993|IPF20135|CaO19.8608	ORF|Uncharacterized	Ca21chr1_C_albicans_SC5314	2324072	2324596	W	CAL0003844	Protein of unknown function; rat catheter biofilm repressed
5.58	orf19.994		orf19.8609|IPF26297.1|IPF20134.1|Contig4-2932_0016|orf6.5804|CA3522|CaO19.994|CaO19.8609|IPF20134	ORF|Uncharacterized	Ca21chr1_C_albicans_SC5314	2325641	2326189	W	CAL0003846	Protein of unknown function; induced by Mnl1 under weak acid stress; flow model biofilm repressed
5.58	orf19.996		orf19.8611|IPF26290.1|IPF6784.2|Contig4-2932_0013|Contig4-2932_0014|orf6.5802|CA3521|LPF7|CaO19.8611|IFA15|CaO19.996	ORF|Uncharacterized	Ca21chr1_C_albicans_SC5314	2327422	2329275	W	CAL0003847	Protein with a predicted leucine-rich repeat domain; possibly an essential gene, disruptants not obtained by UAU1 method
5.58	orf19.997	SNL1	orf19.8612|IPF18325.2|IPF6785.1|Contig4-2932_0011|orf6.5801|CA3520|CaO19.997|IPF6785|CaO19.8612	ORF|Verified	Ca21chr1_C_albicans_SC5314	2330255	2330854	W	CAL0003848	Ribosome-associated protein predicted to function in protein synthesis; 1 predicted transmembrane domain; rat catheter biofilm repressed
5.58	orf19.998		orf19.8613|IPF6787|IPF6787.1|IPF29608.1|Contig4-2932_0010|orf6.5800|CA3519|CaO19.8613|CaO19.998	ORF|Uncharacterized	Ca21chr1_C_albicans_SC5314	2332552	2330990	C	CAL0003850	Putative adapter protein; links synaptojanins Inp52 and Inp53 to the cortical actin cytoskeleton in S. cerevisiae; mutants are viable
5.58	orf19.999	GCA2	IPF16527.3|IPF16526.2|Contig4-2932_0004|orf6.5798|CA3518|GCA1|AMYG2.5f|AMYG2|orf6.5799|IPF6791.2	ORF|Verified	Ca21chr1_C_albicans_SC5314	2335782	2332942	C	CAL0003852	Predicted extracellular glucoamylase; induced by ketoconazole; possibly essential, disruptants not obtained by UAU1 method; promotes biofilm matrix formation; Spider biofilm induced; Bcr1-induced in RPMI a/a biofilms
Function:	GOID	GO_term	Cluster frequency	Background frequency	Corrected P-value	False discovery rate	Gene(s) annotated to the term
	8138	protein tyrosine/serine/threonine phosphatase activity	3 out of 95 genes, 3.2%	9 out of 6473 background genes, 0.1%	0.02533	0.26	C1_09610W_A:C1_09910C_A:CPP1
Componet:	GOID	GO_term	Cluster frequency	Background frequency	Corrected P-value	False discovery rate	Gene(s) annotated to the term	Directly Annotated GOID List
	5673	transcription factor TFIIE complex	2 out of 95 genes, 2.1%	2 out of 6473 background genes, 0.0%	0.0243	0.06	TFA1:C1_10120C_A	97550:5673

## Sheet: AMS4105
Supplementary file 4: Coding Sequences within Complex CNVs
Isolate	Chromosome
AMS4105	Chr1
CNV copy number	ORF ID	Standard Name	Alias	Feature Type	Chromosome	Start Position	Stop Position	Strand	Primary CGD ID	Description
3.98726	orf19.4824		orf19.12287|IPF22463.1|IPF11480.2|Contig4-3078_0040|orf6.7387|CA4755|CaO19.12287|CaO19.4824|IPF11480	ORF|Uncharacterized	Ca21chr1_C_albicans_SC5314	2117999	2118817	W	CAL0005335	Planktonic growth-induced gene
3.98726	orf19.4825		CaO19.4825|FMC1|orf19.12288|IPF22489.1|IPF11479.1|Contig4-3078_0039|orf6.7386|CA4754|CaO19.12288|IPF11479	ORF|Uncharacterized	Ca21chr1_C_albicans_SC5314	2119345	2118881	C	CAL0005336	Mitochondrial matrix protein; required for assembly/stability of the F1 sector of mitochondrial F1F0 ATP synthase at high temperature; rat catheter biofilm repressed
3.98726	orf19.4826	IDH1	orf19.12289|IPF22447.1|IPF11475.1|Contig4-3078_0035|orf6.7385|CA4753|IDH1.3	ORF|Uncharacterized	Ca21chr1_C_albicans_SC5314	2120442	2121755	W	CAL0005337	Putative mitochondrial NAD-isocitrate dehydrogenase subunit 1; soluble protein in hyphae; protein level decrease in stationary phase cultures
3.98726	orf19.4827	ADE12	orf19.12290|IPF22437.1|IPF11474.1|Contig4-3078_0033|orf6.7384|CA4752|CaO19.12290|CaO19.4827	ORF|Uncharacterized	Ca21chr1_C_albicans_SC5314	2122303	2123589	W	CAL0005339	Adenylosuccinate synthase; upregulated in biofilm; decreased expression in hyphae vs yeast-form cells; not induced during GCN response, in contrast to S. cerevisiae ADE12, which is induced by Gcn4p; stationary phase-enriched protein
3.98726	orf19.4828		orf19.12291|IPF22426.1|IPF11473.2|Contig4-3078_0031|orf6.7383|CA4751|IPF11473|CaO19.4828|CaO19.12291	ORF|Uncharacterized	Ca21chr1_C_albicans_SC5314	2124372	2125967	W	CAL0005341	WD repeat domain protein; Hap43-repressed gene; flow model biofilm induced
3.98726	orf19.4829	DOA1	orf19.12292|IPF22371.1|IPF4477.2|Contig4-3078_0030|orf6.7382|CA4750|IPF4477|CaO19.4829|CaO19.12292	ORF|Verified	Ca21chr1_C_albicans_SC5314	2126419	2128704	W	CAL0005343	WD repeat protein; required for ubiquitin-mediated protein degradation; role in control of cellular ubiquitin levels; may promote efficient NHEJ in postdiauxic/stationary phase; Spider biofilm repressed
3.98726	orf19.4830		orf19.12293|IPF22516.1|IPF4478.1|Contig4-3078_0029|orf6.7381|CaO19.12293|CaO19.4830	ORF|Uncharacterized	Ca21chr1_C_albicans_SC5314	2129071	2128739	C	CAL0005351	Protein of unknown function
3.98726	orf19.4831	MTS1	orf19.12294|IPF22422.1|IPF4481.1|Contig4-3078_0026|orf6.7380|CA4749|CaO19.12294|CFA1|IPF4481|CaO19.4831	ORF|Verified	Ca21chr1_C_albicans_SC5314	2129818	2131359	W	CAL0005352	Sphingolipid C9-methyltransferase; catalyzes methylation of the 9th carbon in the long chain base component of glucosylceramides; glucosylceramide biosynthesis is important for virulence; Spider biofilm repressed
3.98726	orf19.4833	MLS1	orf19.12296|IPF22415.1|IPF4483.1|Contig4-3078_0024|orf6.7378|CA4748|CaO19.4833|CaO19.12296	ORF|Verified	Ca21chr1_C_albicans_SC5314	2132388	2134043	W	CAL0005353	Malate synthase; glyoxylate cycle enzyme; no mammalian homolog; regulated upon white-opaque switch; phagocytosis, strong oxidative stress induced; stationary phase enriched; flow model biofilm repressed; rat catheter, Spider biofilm induced
3.98726	orf19.4834		CaO19.12297|orf19.12297|IPF22473.1|IPF4484.1|Contig4-3078_0022|Contig4-3078_0023|orf6.7377|CA4747|IPF4484|CaO19.4834	ORF|Uncharacterized	Ca21chr1_C_albicans_SC5314	2134295	2134999	W	CAL0005355	Protein of unknown function
3.98726	orf19.4835		orf19.12298|IPF22416.1|IPF4485.1|Contig4-3078_0021|orf6.7376|CA4746|CaO19.4835|IPF4485|CaO19.12298	ORF|Uncharacterized	Ca21chr1_C_albicans_SC5314	2136601	2135018	C	CAL0005357	Protein of unknown function
3.98726	orf19.4836	URA1	orf19.12299|IPF22436.1|IPF4487.2|Contig4-3078_0020|orf6.7375|CA4745|CaO19.12299|CaO19.4836	ORF|Verified	Ca21chr1_C_albicans_SC5314	2137047	2138381	W	CAL0005359	Dihydroorotate dehydrogenase; de novo pyrimidine biosynthesis; regulated by yeast-hypha switch, Nrg1/Mig1/Tup1; flow model biofilm induced; rat catheter and Spider biofilm repressed
3.98726	orf19.4837	DAM1	orf19.12300|IPF22462.1|IPF4489.2|Contig4-3078_0019|orf6.7374|CA4744|CaO19.4837|IPF4489|CaO19.12300	ORF|Verified	Ca21chr1_C_albicans_SC5314	2138563	2139396	W	CAL0005362	Essential subunit of the Dam1 (DASH) complex, which acts in chromosome segregation by coupling kinetochores to spindle microtubules
3.98726	orf19.4837.1			ORF|Uncharacterized	Ca21chr1_C_albicans_SC5314	2139635	2139417	C	CAL0120796	Protein of unknown function
3.98726	orf19.4839		orf19.12302|IPF22455.1|IPF4491.1|Contig4-3078_0017|orf6.7372|CA4743|CaO19.4839|CaO19.12302|IPF4491	ORF|Uncharacterized	Ca21chr1_C_albicans_SC5314	2139855	2140751	W	CAL0005366	GET complex subunit; expression downregulated in an ssr1 null mutant
3.98726	orf19.4841	SHY1	orf19.12304|IPF22446.1|IPF4494.1|Contig4-3078_0016|orf6.7370|CA4742|CaO19.4841|CaO19.12304	ORF|Verified	Ca21chr1_C_albicans_SC5314	2141907	2140828	C	CAL0005374	Cytochrome c oxidase biosynthesis protein; transcript regulated by Nrg1 and Mig1
3.98726	orf19.4842		orf19.12305|IPF22509.1|IPF4495.1|Contig4-3078_0014|orf6.7369|CaO19.12305|CaO19.4842	ORF|Uncharacterized	Ca21chr1_C_albicans_SC5314	2142338	2142679	W	CAL0005375	Protein of unknown function; Spider biofilm induced
3.98726	orf19.4843		orf19.12306|IPF22381.1|IPF4496.1|Contig4-3078_0013|orf6.7368|CA4741|CaO19.12306|IPF4496|CaO19.4843	ORF|Uncharacterized	Ca21chr1_C_albicans_SC5314	2144968	2142773	C	CAL0005376	Putative iron/copper reductas; involved in iron homeostasis; rat catheter and Spider biofilm induced
3.98726	orf19.4844		orf19.12307|IPF22442.1|IPF4497.2|Contig4-3078_0012|orf6.7367|CA4740|IPF4497|CaO19.12307|CaO19.4844	ORF|Uncharacterized	Ca21chr1_C_albicans_SC5314	2146676	2145531	C	CAL0005378	Protein of unknown function
3.98726	orf19.4845	TVP18	orf19.12308|IPF22486.1|IPF4498.2|Contig4-3078_0010|orf6.7366|CA4739|CaO19.4845|IPF4498|CaO19.12308	ORF|Uncharacterized	Ca21chr1_C_albicans_SC5314	2147583	2147062	C	CAL0005379	Putative integral membrane protein; fluconazole-induced
3.98726	orf19.4846		orf19.12309|IPF4500|IPF22439.1|IPF4500.1|Contig4-3078_0008|orf6.7365|CA4738|CaO19.12309|CaO19.4846	ORF|Uncharacterized	Ca21chr1_C_albicans_SC5314	2148256	2149497	W	CAL0005381	GlcNAc-induced protein
3.98726	orf19.4847		IPF22481.1|IPF4499.1|orf6.7364	ORF|Uncharacterized	Ca21chr1_C_albicans_SC5314	2148905	2148453	C	CAF0007022	Protein of unknown function
3.98726	orf19.4848	SKI3	CaO19.4848|orf19.12311|IPF22503.1|IPF4502.1|Contig4-3078_0006|orf6.7363|CA4737|CaO19.12311	ORF|Uncharacterized	Ca21chr1_C_albicans_SC5314	2149827	2154029	W	CAL0005384	Protein of unknown function
3.98726	orf19.4849		orf19.12312|IPF22448.1|IPF4503.2|Contig4-3078_0005|orf6.7362|CA4736|STS1|CaO19.12312|IPF4503|CaO19.4849	ORF|Uncharacterized	Ca21chr1_C_albicans_SC5314	2155073	2154090	C	CAL0005386	Protein required for localizing proteasomes to the nucleus; involved in ubiquitin-mediated protein degradation; possibly an essential gene, disruptants not obtained by UAU1 method; Spider biofilm induced
3.98726	orf19.4850		orf19.12313|IPF22396.1|IPF7726.2|Contig4-2920_0017|Contig4-3078_0001|orf6.7361|CA4735|CaO19.4850|IPF7726|CaO19.12313	ORF|Uncharacterized	Ca21chr1_C_albicans_SC5314	2157940	2156090	C	CAL0005398	Protein of unknown function
3.98726	orf19.4851	TFA1	CaO19.12314|orf19.12314|IPF22440.1|IPF7729.1|Contig4-2920_0015|orf6.7360|CA4734|CaO19.4851	ORF|Uncharacterized	Ca21chr1_C_albicans_SC5314	2159971	2158787	C	CAL0005399	Protein with polyglutamate motifs and abundant Ser/Thr residues; described as a subunit of TFIIE, which is a basal transcription initiation factor of RNA Polymerase II; possibly an essential gene, disruptants not obtained by UAU1 method
3.98726	orf19.4853	HCM1	orf19.12316|orf6.7358|IPF22406.1|IPF7732.2|Contig4-2920_0014|CA4733|CaO19.4853|CaO19.12316|IPF7732	ORF|Uncharacterized	Ca21chr1_C_albicans_SC5314	2161492	2163231	W	CAL0005400	Protein with forkhead domain; similar to S. cerevisiae Hcm1p; Hap43p-induced gene
3.98726	orf19.4855	BUD31	orf19.12318|IPF22484.1|IPF7733.1|Contig4-2920_0013|orf6.7356|CA4732|CaO19.4855|CaO19.12318|IPF7733	ORF|Uncharacterized	Ca21chr1_C_albicans_SC5314	2164013	2163561	C	CAL0005402	Bud31 ortholog; not subject to mating-type regulation, in contrast to S. cerevisiae Bud31 which has a role in specifying the bud site; Spider biofilm induced
3.98726	tS(CGA)1	tS(CGA)1	tS(CGA)1.2	tRNA|Uncharacterized	Ca21chr1_C_albicans_SC5314	2164386	2164292	C	CAF0007231	tRNA-Ser, predicted by tRNAscan-SE; CGA anticodon
3.98726	orf19.4856	LIP3	orf19.12319|IPF22432.1|IPF7736.2|Contig4-2920_0010|orf6.7355|CA4731|CaO19.4856|CaO19.12319	ORF|Uncharacterized	Ca21chr1_C_albicans_SC5314	2166143	2167558	W	CAL0005403	Secreted lipase; gene family member whose members are expressed differentially in response to carbon source and infection; possible role in nutrition and/or in creating an acidic microenvironment; flow model biofilm induced
3.98726	orf19.4857		orf19.12320|IPF7737.2|IPF28260.1|Contig4-2920_0009|orf6.7354|CA4730|CaO19.12320|IPF7737|CaO19.4857	ORF|Uncharacterized	Ca21chr1_C_albicans_SC5314	2168519	2167701	C	CAL0005405	Protein with a dual-specificity phosphatase domain; Hap43-induced gene
5.80892	orf19.4858	VPS41	orf19.12321|IPF12249.2|IPF12250.3|IPF28261.1|IPF28247.1|Contig4-2920_0005|Contig4-2920_0006|orf6.7353|orf6.7352|CA4729|orf19.12322|orf19.4859|orf19.12323|orf19.4860|orf6.687|CA4728|IPF12252.2|IPF28264.1|VAM2|VPS41.5f	ORF|Verified	Ca21chr1_C_albicans_SC5314	2169829	2172714	W	CAL0005408	Protein similar to S. cerevisiae Vps41p, which is involved in vacuole organization and biogenesis; transposon mutation affects filamentous growth; regulated by Gcn4p; induced in response to amino acid starvation (3-aminotriazole treatment)
5.80892	orf19.4861		orf19.12324|IPF12253.1|IPF19185.1|Contig4-2920_0002|orf6.688|orf6.7351|CA4727|CaO19.4861|IPF12253	ORF|Uncharacterized	Ca21chr1_C_albicans_SC5314	2173072	2173884	W	CAL0005430	Protein of unknown function; rat catheter biofilm repressed
5.80892	orf19.4861.1		IPF12254.2|IPF19184.1|orf6.7350	ORF|Uncharacterized	Ca21chr1_C_albicans_SC5314	2173946	2174230	W	CAF0007023	Protein of unknown function
5.80892	orf19.4862		CaO19.4862|orf19.12326|IPF12255.2|IPF16153.2|Contig4-1868_0003|orf6.689|orf6.7349|CA4726|IPF12255	ORF|Uncharacterized	Ca21chr1_C_albicans_SC5314	2174808	2174212	C	CAL0005431	Putative integral membrane protein; S. cerevisiae ortholog Tvp23 localizes to late Golgi vesicles; rat catheter biofilm induced
5.80892	orf19.4862.2	PET100	IPF16152.1|IPF12257.1|Contig4-1868_0004|CA4725	ORF|Verified	Ca21chr1_C_albicans_SC5314	2175074	2175498	W	CAF0007024	Chaperone that facilitates the assembly of cytochrome c oxidase; plasma membrane protein
5.80892	orf19.4863	PDC2	orf19.12327|IPF16151.2|IPF12258.2|Contig4-2286_0003|Contig4-2286_0005|orf6.442|orf6.690|orf6.7348|CA4724|CTA5|CaO19.4863	ORF|Uncharacterized	Ca21chr1_C_albicans_SC5314	2178173	2175663	C	CAL0005432	Homeodomain-like transcription factor; regulator of pyruvate decarboxylase; contains a putative C-terminal activation domain, Glu- and Pro-rich; complements glucose utilization defect of S. cerevisiae pdc2 mutant
5.80892	orf19.4864		orf19.12328|IPF18177.1|IPF16983.2|Contig4-2286_0002|orf6.441|orf6.7347|CA4723|YJU3|CaO19.4864|IPF18177	ORF|Uncharacterized	Ca21chr1_C_albicans_SC5314	2179911	2178997	C	CAL0005433	Protein of unknown function
5.80892	orf19.4865		orf19.12329|IPF15617.2|IPF16984.3|Contig4-2255_0013|orf6.440|orf6.7346|CA4722|CaO19.4865|SAC1	ORF|Uncharacterized	Ca21chr1_C_albicans_SC5314	2181078	2182934	W	CAL0005434	Protein of unknown function
5.80892	orf19.4866	CPP1	CaO19.4866|orf19.12330|IPF15616.2|IPF19180.2|Contig4-2255_0001|orf6.707|orf6.7345|CA4721	ORF|Verified	Ca21chr1_C_albicans_SC5314	2185137	2183344	C	CAL0005436	VH1 family MAPK phosphatase; regulates Cst20-Hst7-Cek1-Cph1 filamentation pathway; represses yeast-hyphal switch; required for virulence in mice; yeast-enriched; induced by alpha pheromone in SpiderM medium; Spider biofilm induced
5.80892	orf19.4867	SWE1	CaO19.4867|orf19.12331|IPF10223.3|IPF28274.1|Contig4-1510_0001|Contig4-1510_0003|Contig4-2622_0001|orf6.2582|orf6.706|CA1200|IPF10223|IPF10223.2	ORF|Verified	Ca21chr1_C_albicans_SC5314	2192696	2189160	C	CAL0005438	Putative protein kinase with a role in control of growth and morphogenesis, required for full virulence; mutant cells are small, rounded, and sometimes binucleate; not required for filamentous growth; mutant is hypersensitive to caspofungin
5.80892	orf19.4869	SFU1	orf19.12333|orf6.2584|IPF22421.1|IPF19906.1|Contig4-2622_0003|Contig4-2622_0004|CA1201|CaO19.12333|IPF19906|CaO19.4869	ORF|Verified	Ca21chr1_C_albicans_SC5314	2195405	2196958	W	CAL0005442	GATA-type transcription factor; regulator of iron-responsive genes; represses iron utilization genes if iron is present; Hap43-repressed; promotes gastrointestinal commensalism in mice; Spider biofilm induced
5.80892	orf19.4870	DBP3	orf19.12334|IPF10215.2|IPF17356.3|Contig4-2619_0001|Contig4-2622_0005|orf6.2585|orf6.3829|CA1202|CaO19.4870	ORF|Uncharacterized	Ca21chr1_C_albicans_SC5314	2197121	2198815	W	CAL0005460	Putative ATP-dependent DEAD-box RNA helicase; Hap43-induced; repressed by prostaglandins; Spider biofilm induced
5.80892	orf19.4871	ERO1	orf19.12335|IPF17353.3|IPF13354.2|Contig4-2619_0004|Contig4-2619_0005|orf6.2586|orf6.3830|CA2076|CaO19.4871	ORF|Uncharacterized	Ca21chr1_C_albicans_SC5314	2199912	2201654	W	CAL0005461	Ortholog of S. cerevisiae Ero1; role in formation of disulfide bonds in the endoplasmic reticulum; fluconazole-induced; induced by Mnl1 under weak acid stress; Spider biofilm induced
5.80892	orf19.4872		orf19.12336|IPF13353|IPF22461.1|IPF13353.1|Contig4-2619_0009|orf6.3831|CA2077|CaO19.12336|CaO19.4872	ORF|Uncharacterized	Ca21chr1_C_albicans_SC5314	2202256	2203107	W	CAL0005462	Protein of unknown function; induced by Mnl1 under weak acid stress; Hap43-induced; mutant is viable
5.80892	orf19.4873		orf19.12337|IPF17929.2|IPF13352.1|Contig4-2619_0010|orf6.113|orf6.3832|CA2078|CaO19.4873|IPF13352	ORF|Uncharacterized	Ca21chr1_C_albicans_SC5314	2204101	2203589	C	CAL0005463	Protein of unknown function; transcript regulated by white-opaque switch; flow model biofilm induced; Spider biofilm induced
5.80892	orf19.4874	MNN23	orf19.12338|IPF22402.1|IPF13350.2|Contig4-2619_0014|Contig4-2619_0015|orf6.112|orf6.3833|CA2079|CaO19.4874|MNN3	ORF|Verified	Ca21chr1_C_albicans_SC5314	2207407	2205587	C	CAL0005465	Alpha-1,2-mannosyltransferase; mutants hypersensitive to toxic ergosterol analog, amphotericin B, calcofluor white, growth at 42 degrees and have decreased cell wall mannan; flow model biofilm induced
5.80892	orf19.4875		CaO19.4875|CWC21|CaO19.12339|orf19.12339|IPF22483.1|IPF9693.2|orf6.3834|CA2080|IPF9693	ORF|Uncharacterized	Ca21chr1_C_albicans_SC5314	2208671	2209159	W	CAL0005467	Protein of unknown function
5.80892	orf19.4878		orf19.12342|IPF22361.1|IPF9699.2|orf6.3837|CA2081|IPF9699|CaO19.12342|CaO19.4878	ORF|Uncharacterized	Ca21chr1_C_albicans_SC5314	2212048	2209502	C	CAL0005472	Protein of unknown function; Hap43-repressed; rat catheter biofilm repressed
5.80892	orf19.4879.2	NTF2	IPF22508.1|IPF9700.2|Contig4-2738_0001|CA2082	ORF|Uncharacterized	Ca21chr1_C_albicans_SC5314	2212873	2212390	C	CAF0007025	Putative nuclear envelope protein; regulated by Ssn6; rat catheter biofilm repressed
5.80892	orf19.4880		orf19.12344|IPF17533.2|orf6.3839|CA0598|orf6.1625|orf6.3840|IPF9703.2|orf19.4881|CA6291|Contig4-2738_0005|Contig4-2738_0006|IPF17532.3|IPF9703.5f|IPF9703|CaO19.4880|YFW5	ORF|Uncharacterized	Ca21chr1_C_albicans_SC5314	2214100	2216268	W	CAL0005494	Protein of unknown function; flow model biofilm induced
5.80892	orf19.4882		orf19.12345|IPF9704.2|IPF28259.1|Contig4-2738_0007|orf6.1624|orf6.3841|CA0597|TFA2|CaO19.4882|IPF9704	ORF|Uncharacterized	Ca21chr1_C_albicans_SC5314	2217342	2216488	C	CAL0005496	TFIIE small subunit; involved in RNA polymerase II transcription initiation; Spider biofilm induced
5.80892	snR10a			snoRNA|Uncharacterized	Ca21chr1_C_albicans_SC5314	2217768	2217868	W	CAL0126268	H/ACA box small nucleolar RNA (snoRNA)
5.80892	orf19.4883		orf19.12346|IPF9706.2|IPF18549.2|Contig4-2738_0012|orf6.1623|orf6.3842|CA0596|IPF9706|CaO19.4883	ORF|Uncharacterized	Ca21chr1_C_albicans_SC5314	2220202	2217971	C	CAL0005497	Protein of unknown function; S. cerevisiae ortholog Cos111 confers resistance to the antifungal drug ciclopirox olamine; constitutive expression independent of MTL or white-opaque status; Spider biofilm induced
5.80892	orf19.4884	WOR1	orf19.12348|IPF22376.1|IPF15255.2|Contig4-2464_0001|orf6.3050|CA1512|EAP2|TOS9|YEL007W|IPF15255|CaO19.4884|CaO19.12348	ORF|Verified	Ca21chr1_C_albicans_SC5314	2230537	2232894	W	CAL0005498	Transcription factor ("master switch") of white-opaque phenotypic switching; required to establish and maintain the opaque state; opaque-specific, nuclear; regulates its own expression; suggested role in regulation of adhesion factors
5.80892	orf19.4885	MIR1	orf19.12349|IPF22456.1|IPF7536.2|Contig4-2934_0003|orf6.3051|CA1513|CaO19.4885|CaO19.12349	ORF|Verified	Ca21chr1_C_albicans_SC5314	2236380	2237303	W	CAL0005500	Putative mitochondrial phosphate transporter; caspofungin repressed; expression is increased in a fluconazole-resistant isolate; induced upon adherence to polystyrene
5.80892	orf19.4886		orf19.12350|IPF22472.1|IPF7539.1|Contig4-2934_0006|orf6.3052|CA1514|CaO19.12350|CaO19.4886|IPF7539	ORF|Uncharacterized	Ca21chr1_C_albicans_SC5314	2239176	2239892	W	CAL0005502	Putative adhesin-like protein; Hap43-repressed; rat catheter and Spider biofilm induced
5.80892	orf19.4887	ECM21	orf19.12352|IPF18663.2|IPF7541.3|Contig4-2934_0009|orf6.3053|orf6.3331|CA1707|ECM21.3|CaO19.4887|CA1515|IPF18663.1	ORF|Uncharacterized	Ca21chr1_C_albicans_SC5314	2242403	2240214	C	CAL0005504	Predicted regulator of endcytosis of plasma membrane proteins; fluconazole induced, alkaline induced by Rim101; repressed by caspofungin and in azole-resistant strain overexpressing MDR1; flow model, rat catheter and Spider biofilm induced
5.80892	orf19.4888		orf19.12353|IPF22460.1|IPF7543.2|Contig4-2934_0015|orf6.3332|CA1708|CaO19.12353|YRA1|IPF7543|CaO19.4888	ORF|Uncharacterized	Ca21chr1_C_albicans_SC5314	2245436	2246269	W	CAL0005506	Protein of unknown function
5.80892	orf19.4889		orf19.12354|IPF22405.1|IPF7544.2|Contig4-2934_0016|orf6.3333|CA1709|HOL1|CaO19.4889|HOL2|CaO19.12354	ORF|Uncharacterized	Ca21chr1_C_albicans_SC5314	2248267	2246513	C	CAL0005508	Predicted MFS family membrane transporter, member of the drug:proton antiporter (12 spanner) (DHA1) family; Spider biofilm induced
5.80892	orf19.4890	CLA4	orf19.12355|IPF15972.3|IPF16297.2|Contig4-2934_0017|orf6.3334|orf6.53|CA1710|CaO19.4890	ORF|Verified	Ca21chr1_C_albicans_SC5314	2252473	2249543	C	CAL0005519	Ste20p family Ser/Thr kinase required for wild-type filamentous growth, organ colonization and virulence in mouse systemic infection; role in chlamydospore formation; functional homolog of S. cerevisiae Cla4p; mutant caspofungin sensitive
5.80892	orf19.4892	TPK1	orf19.12357|IPF12285.2|IPF18622.2|Contig4-2955_0006|orf6.3336|orf6.4228|CA2355|TPK3|CaO19.4892	ORF|Verified	Ca21chr1_C_albicans_SC5314	2256855	2255638	C	CAL0005520	cAMP-dependent protein kinase catalytic subunit; Tpk2 isoform; control of morphogenesis and stress response; WT nuclear localization requires Bcy1; produced during stationary, not exponential growth; rat catheter and Spider biofilm induced
5.80892	orf19.4893		CaO19.12358|orf19.12358|IPF12282|IPF22500.1|IPF12282.2|Contig4-2955_0011|Contig4-2955_0014|orf6.4229|CA2356|CaO19.4893	ORF|Uncharacterized	Ca21chr1_C_albicans_SC5314	2263716	2259391	C	CAL0005521	Protein of unknown function
5.80892	orf19.4894		orf19.12359|IPF22469.1|IPF8957.2|IPF8957|Contig4-2955_0017|orf6.4230|CA2357|CaO19.12359|CaO19.4894	ORF|Uncharacterized	Ca21chr1_C_albicans_SC5314	2264847	2264113	C	CAL0005522	Protein with similarity to S. cerevisiae Yer010cp, a protein of unknown function belonging to the prokaryotic RraA family; repressed by benomyl; Hap43-induced; Spider biofilm induced
5.80892	orf19.4895		orf19.12360|IPF22453.1|IPF8953.2|Contig4-2955_0019|Contig4-2955_0021|orf6.4231|CA2358|IPF8953|CaO19.12360|CaO19.4895	ORF|Uncharacterized	Ca21chr1_C_albicans_SC5314	2265944	2265123	C	CAL0005524	Protein of unknown function
5.80892	orf19.4896	RPA34	CaO19.12361|orf19.12361|IPF22470.1|IPF8952.1|Contig4-2955_0022|orf6.4232|CA2359|IPF8952|CaO19.4896	ORF|Uncharacterized	Ca21chr1_C_albicans_SC5314	2267063	2266341	C	CAL0005526	Putative RNA polymerase I subunit; rat catheter biofilm induced
5.80892	orf19.4897	SFH5	orf19.12362|IPF22451.1|IPF8951.2|Contig4-2955_0023|orf6.4233|CA2360|IPF8951|CaO19.4897|CaO19.12362	ORF|Uncharacterized	Ca21chr1_C_albicans_SC5314	2268407	2267445	C	CAL0005528	Putative phosphatidylinositol transporter; rat catheter and Spider biofilm repressed
5.80892	orf19.4898		orf19.12363|IPF8950.1|IPF28258.1|Contig4-2955_0025|orf6.4234|CA2361|CaO19.12363|CaO19.4898|IPF8950	ORF|Uncharacterized	Ca21chr1_C_albicans_SC5314	2269357	2268668	C	CAL0005529	Putative protein of unknown function; induced by prostaglandins
4.52229	orf19.4899	GCA1	orf19.12365|MP190|IPF22352.1|IPF8948.2|Contig4-2932_0006|Contig4-2955_0029|orf6.2026|orf6.4236|orf6.5799|orf6.649|CA0855|AMYG1|CaO19.4899	ORF|Verified	Ca21chr1_C_albicans_SC5314	2271539	2274379	W	CAL0005531	Extracellular/plasma membrane-associated glucoamylase; expressed in rat oral infection; regulated by carbohydrates, pH, galactose; promotes biofilm matrix formation; flow model biofilm induced; Bcr1 repressed in RPMI a/a biofilms
4.52229	orf19.4900	MNN12	orf19.12366|IPF17635.3|IPF8854.2|Contig4-2409_0001|orf6.2025|orf6.4237|CA0854|CaO19.4900|IPF8854	ORF|Uncharacterized	Ca21chr1_C_albicans_SC5314	2276399	2278885	W	CAL0006195	Predicted alpha-1,3-mannosyltransferase activity with a role in protein glycosylation
4.52229	orf19.4901		orf6.2023|orf6.1621|CA6292|orf19.4902|orf19.12367|IPF18850.1|Contig4-2409_0004|orf6.2024|CA0595|IPF8856.5f|IPF8856|IPF8856.2|CaO19.4901	ORF|Uncharacterized	Ca21chr1_C_albicans_SC5314	2280112	2281146	W	CAL0006196	Predicted methyltransferase; Spider biofilm induced
4.52229	orf19.4903		orf19.12368|IPF8860.1|IPF28257.1|Contig4-2762_0010|orf6.1620|CA0594|CaO19.4903|IPF8860|CaO19.12368|GPI12	ORF|Uncharacterized	Ca21chr1_C_albicans_SC5314	2282361	2283422	W	CAL0006198	Protein of unknown function
4.52229	orf19.4904		orf19.12369|IPF22430.1|IPF8861.2|Contig4-2762_0009|orf6.1619|CA0593|CaO19.4904|ARP6|CaO19.12369	ORF|Uncharacterized	Ca21chr1_C_albicans_SC5314	2284784	2283444	C	CAL0006200	Protein of unknown function
4.52229	orf19.4905		orf19.12370|IPF8862.2|IPF28254.1|Contig4-2762_0006|orf6.1618|CA0592|CaO19.4905|IPF8862	ORF|Uncharacterized	Ca21chr1_C_albicans_SC5314	2285620	2287173	W	CAL0006202	Putative MFS transporter; Hap43p-induced gene; also regulated by regulated by Sef1p and Sfu1p; repressed in a ssr1 null mutant
4.52229	orf19.4906		orf19.12372|IPF17082.3|IPF8866.2|Contig4-2762_0005|orf6.1617|orf6.430|orf6.699|CA0076|CaO19.4906|IPF8866	ORF|Uncharacterized	Ca21chr1_C_albicans_SC5314	2289577	2287271	C	CAL0006203	Putative adhesin-like protein; positively regulated by Tbf1; Spider biofilm induced
4.52229	orf19.4907		orf19.12373|IPF22400.1|IPF17283.2|Contig4-2762_0012|orf6.3754|CA2021|CaO19.12373|IPF17283|CaO19.4907	ORF|Uncharacterized	Ca21chr1_C_albicans_SC5314	2294809	2292992	C	CAL0006205	Putative protein of unknown function; Hap43p-repressed gene; increased transcription is observed upon fluphenazine treatment; possibly transcriptionally regulated by Tac1p; induced by nitric oxide; fungal-specific (no human/murine homolog
4.52229	orf19.4908		orf19.12374|IPF22515.1|IPF9610.2|Contig4-2018_0002|orf6.3755|CaO19.4908|CaO19.12374	ORF|Dubious	Ca21chr1_C_albicans_SC5314	2295578	2295913	W	CAL0006208	Dubious open reading frame
4.52229	orf19.4909	CBK1	CaO19.12375|CaO19.4909|orf19.12375|IPF22379.1|IPF9611.2|Contig4-2855_0009|orf6.3756|CA2022	ORF|Verified	Ca21chr1_C_albicans_SC5314	2299136	2296938	C	CAL0006211	Ser/Thr kinase of cell wall integrity pathway; mutants show abnormal morphology and aggregation; Mob2p associated; required for wild-type hyphal growth and transcriptional regulation of cell-wall-associated genes
4.52229	orf19.4909.1	RPL42	IPF22520.1|IPF9613.2|Contig4-2508_0008|CA2023|RPL42.3	ORF|Uncharacterized	Ca21chr1_C_albicans_SC5314	2300710	2300032	C	CAF0007026	Putative 60S ribosomal subunit protein; colony morphology-related gene regulation by Ssn6; Spider biofilm repressed
4.52229	orf19.4910	FGR41	orf19.12376|IPF22465.1|IPF9616.1|Contig4-2508_0005|orf6.3757|CA2024|PGA35|CaO19.4910|CaO19.12376|IPF9616	ORF|Verified	Ca21chr1_C_albicans_SC5314	2302038	2301286	C	CAL0006224	Putative GPI-anchored adhesin-like protein; transposon mutation affects filamentous growth; Spider biofilm repressed
4.52229	orf19.4911		orf19.12377|IPF17046.3|IPF9618.2|Contig4-2508_0004|orf6.3758|CA2025|orf19.8596|orf19.981|orf6.580|IPF26300.1|IPF29610.1|CaO19.4911|IPF9618|CaO19.12377	ORF|Uncharacterized	Ca21chr1_C_albicans_SC5314	2304212	2305174	W	CAL0006225	BED zinc finger protein; predicted DNA binding protein; Spider biofilm repressed
4.52229	orf19.4912		orf19.12378|IPF22445.1|IPF9619.2|orf6.3759|orf19.8598|orf19.983|orf6.578|orf6.5815|CA0121|Contig4-2508_0003|IPF17048.2|IPF9924.2|CaO19.4912|CaO19.12378	ORF|Uncharacterized	Ca21chr1_C_albicans_SC5314	2307229	2305295	C	CAL0006226	Protein of unknown function
4.52229	orf19.984	PHO8	orf19.8599|orf6.5814|IPF26293.1|IPF9926.2|Contig4-2694_0008|CA3530|CaO19.8599|IPF9926|CaO19.984	ORF|Uncharacterized	Ca21chr1_C_albicans_SC5314	2309139	2310647	W	CAL0003811	Putative repressible vacuolar alkaline phosphatase; Rim101-induced transcript; regulated by Tsa1, Tsa1B in minimal media at 37 deg; possibly adherence-induced
4.52229	orf19.985		CaO19.985|orf19.8600|IPF9929.2|IPF18934.2|Contig4-2694_0006|orf6.1594|orf6.5813|CA3529|IPF9929	ORF|Uncharacterized	Ca21chr1_C_albicans_SC5314	2311282	2313795	W	CAL0003812	Protein of unknown function
4.52229	orf19.986	GLY1	orf19.8601|IPF9931.1|IPF6766.1|Contig4-2262_0004|Contig4-2694_0002|orf6.1595|orf6.5812|CA3528|GLY1-1|GLY1-2|CaO19.986|GLY11	ORF|Verified	Ca21chr1_C_albicans_SC5314	2315247	2316368	W	CAL0003813	L-threonine aldolase; complements glycine auxotrophy of S. cerevisiae shm1 shm2 gly1-1 triple mutant; macrophage/pseudohyphal-induced; the GLY1 locus has an RFLP and is triploid in strain SGY269; flow model biofilm induced
4.52229	orf19.988		orf19.8603|IPF9934.1|IPF6770.1|Contig4-2262_0003|Contig4-2694_0001|orf6.1597|orf6.5810|CA3527|CaO19.988|IPF9934	ORF|Uncharacterized	Ca21chr1_C_albicans_SC5314	2316720	2317952	W	CAL0003815	Protein of unknown function; oral infection upregulated gene; upregulated in strains from HIV+ patients with oral candidiasis; mutants have reduced ability to damage oral epithelial cells; transcript possibly regulated upon hyphal formation
4.52229	orf19.989		orf19.990.1|orf19.8604|IPF9936.2|IPF6773.2|IPF20059.1|Contig4-2262_0002|orf6.5809|orf6.1598|CA6251|CA3526|MRPS5.5f|MRPS5.3f|MRPS5	ORF|Uncharacterized	Ca21chr1_C_albicans_SC5314	2318337	2319347	W	CAL0003817	Mitochondrial ribosomal protein of the small subunit; Spider biofilm repressed
4.52229	orf19.991	DJP1	orf19.8606|orf6.5807|IPF6776.2|IPF18933.2|Contig4-2932_0022|CA3525|CaO19.991|CaO19.8606	ORF|Uncharacterized	Ca21chr1_C_albicans_SC5314	2319827	2321353	W	CAL0003840	Similar to bacterial DnaJ; reported to have a role in peroxisome biogenesis; induced in low iron and upon adherence to polystyrene
4.52229	orf19.992	LKH1	orf19.8607|IPF26288.1|IPF6778.2|Contig4-2932_0021|orf6.5806|CA3524|LKH1.3|CaO19.992|CaO19.8607|LKH1.3f	ORF|Uncharacterized	Ca21chr1_C_albicans_SC5314	2321637	2323508	W	CAL0003842	Putative leukotriene A(4) hydrolase; repressed during the mating process; Hog1p-induced
4.52229	orf19.993		orf19.8608|IPF26298.1|IPF20135.1|Contig4-2932_0019|orf6.5805|CA3523|DOP98|CaO19.993|IPF20135|CaO19.8608	ORF|Uncharacterized	Ca21chr1_C_albicans_SC5314	2324072	2324596	W	CAL0003844	Protein of unknown function; rat catheter biofilm repressed
4.52229	orf19.994		orf19.8609|IPF26297.1|IPF20134.1|Contig4-2932_0016|orf6.5804|CA3522|CaO19.994|CaO19.8609|IPF20134	ORF|Uncharacterized	Ca21chr1_C_albicans_SC5314	2325641	2326189	W	CAL0003846	Protein of unknown function; induced by Mnl1 under weak acid stress; flow model biofilm repressed
4.52229	orf19.996		orf19.8611|IPF26290.1|IPF6784.2|Contig4-2932_0013|Contig4-2932_0014|orf6.5802|CA3521|LPF7|CaO19.8611|IFA15|CaO19.996	ORF|Uncharacterized	Ca21chr1_C_albicans_SC5314	2327422	2329275	W	CAL0003847	Protein with a predicted leucine-rich repeat domain; possibly an essential gene, disruptants not obtained by UAU1 method
4.52229	orf19.997	SNL1	orf19.8612|IPF18325.2|IPF6785.1|Contig4-2932_0011|orf6.5801|CA3520|CaO19.997|IPF6785|CaO19.8612	ORF|Verified	Ca21chr1_C_albicans_SC5314	2330255	2330854	W	CAL0003848	Ribosome-associated protein predicted to function in protein synthesis; 1 predicted transmembrane domain; rat catheter biofilm repressed
4.52229	orf19.998		orf19.8613|IPF6787|IPF6787.1|IPF29608.1|Contig4-2932_0010|orf6.5800|CA3519|CaO19.8613|CaO19.998	ORF|Uncharacterized	Ca21chr1_C_albicans_SC5314	2332552	2330990	C	CAL0003850	Putative adapter protein; links synaptojanins Inp52 and Inp53 to the cortical actin cytoskeleton in S. cerevisiae; mutants are viable
4.52229	orf19.999	GCA2	IPF16527.3|IPF16526.2|Contig4-2932_0004|orf6.5798|CA3518|GCA1|AMYG2.5f|AMYG2|orf6.5799|IPF6791.2	ORF|Verified	Ca21chr1_C_albicans_SC5314	2335782	2332942	C	CAL0003852	Predicted extracellular glucoamylase; induced by ketoconazole; possibly essential, disruptants not obtained by UAU1 method; promotes biofilm matrix formation; Spider biofilm induced; Bcr1-induced in RPMI a/a biofilms
3.38854	orf19.1002		orf19.8618|IPF26289.1|IPF15371.2|orf6.5795|CA3517|IFA22|CaO19.8618|LPF8|CaO19.1002	ORF|Uncharacterized	Ca21chr1_C_albicans_SC5314	2339580	2337688	C	CAL0001015	Protein of unknown function; Hap43-repressed gene
3.38854	orf19.1005		IPF15368.2|Contig4-1962_0003|orf6.581|orf19.8619|orf19.1003|orf6.5794|CA6182|IPF18326.1|IPF19532.1|CaO19.1005|LPF10	ORF|Uncharacterized	Ca21chr1_C_albicans_SC5314	2342386	2340578	C	CAL0001021	Protein with predicted RNI-like domains; rat catheter biofilm induced
3.38854	orf19.1830		orf19.9389|IPF25491.1|IPF16475.1|Contig4-1874_0001|orf6.1220|CaO19.9389|CaO19.1830	ORF|Uncharacterized	Ca21chr1_C_albicans_SC5314	2344641	2344309	C	CAL0001649	Protein of unknown function; Hap43-induced; rat catheter and Spider biofilm induced
3.38854	snR62			snoRNA|Uncharacterized	Ca21chr1_C_albicans_SC5314	2346881	2346968	W	CAL0126171	C/D box small nucleolar RNA (snoRNA)
3.38854	orf19.1831		IPF29291.1|Contig4-2756_0003|orf6.1221|CaO19.1831	ORF|Dubious	Ca21chr1_C_albicans_SC5314	2349094	2348672	C	CAL0001651	Dubious open reading frame
3.38854	orf19.1832	FCY23	orf19.9390|IPF10337.1|IPF29289.1|Contig4-2756_0005|orf6.4254|CA2374|CaO19.1832|TPN11|CaO19.9390	ORF|Uncharacterized	Ca21chr1_C_albicans_SC5314	2349943	2351736	W	CAL0001652	Putative transporter; Gcn4p-regulated; more similar to S. cerevisiae Tpn1p, which is a vitamin B6 transporter, than to purine-cytosine permeases
3.38854	orf19.1833		orf19.9391|IPF25486.1|IPF10336.1|Contig4-2756_0007|orf6.4253|CA2373|CaO19.1833|CaO19.9391|CBF5	ORF|Uncharacterized	Ca21chr1_C_albicans_SC5314	2352602	2354041	W	CAL0001653	Protein of unknown function
3.38854	orf19.1834		orf19.9392|IPF25484.1|IPF10335.2|Contig4-2756_0008|Contig4-2756_0009|orf6.4252|CA2372|CaO19.1834|IPF10335|CaO19.9392	ORF|Uncharacterized	Ca21chr1_C_albicans_SC5314	2356937	2354205	C	CAL0001654	Protein of unknown function
3.38854	orf19.1835	PEA2	orf19.9393|IPF25485.1|IPF10333.2|Contig4-2756_0010|Contig4-2756_0011|orf6.4251|CA2371|CaO19.9393|CaO19.1835|IPF10333	ORF|Uncharacterized	Ca21chr1_C_albicans_SC5314	2359254	2357350	C	CAL0001655	Putative coiled-coil polarisome; predicted role in polarized morphogenesis, cell fusion, and low affinity Ca2+ influx; rat catheter biofilm induced
3.38854	orf19.1836	APN2	orf19.9394|IPF25487.1|IPF10847.1|Contig4-2684_0005|Contig4-2756_0014|orf6.4250|CA2370|CaO19.1836|CaO19.9394	ORF|Uncharacterized	Ca21chr1_C_albicans_SC5314	2361077	2362432	W	CAL0001657	Putative class II abasic (AP) endonuclease; flucytosine induced
3.38854	orf19.1837	TBP1	orf19.9395|IPF25489.1|IPF10845.1|Contig4-2684_0004|orf6.4249|CA2369|CaO19.9395|CaO19.1837	ORF|Verified	Ca21chr1_C_albicans_SC5314	2362662	2363378	W	CAL0001658	Transcription initiation factor; binds TATA box sequence, binding does not require TFIIA; caspofungin repressed; functional homolog of S. cerevisiae and human TATA-binding proteins; Spider biofilm induced
3.38854	orf19.1839	RPA190	orf19.9397|IPF25490.1|IPF10842.2|Contig4-2684_0001|Contig4-2684_0002|orf6.4247|CA2368|CaO19.9397|CaO19.1839	ORF|Uncharacterized	Ca21chr1_C_albicans_SC5314	2369345	2364348	C	CAL0001661	Putative RNA polymerase I subunit A190; Hap43p-induced gene; flucytosine induced
3.38854	orf19.1840		CaO19.1840|orf19.9398|IPF25488.1|IPF10840.2|orf6.4246|CA6195|orf19.9889|orf19.2353|orf6.4199|CA2336|IPF13383.2|IPF24966.1|CaO19.9398|IPF10840.3eoc	ORF|Uncharacterized	Ca21chr1_C_albicans_SC5314	2373535	2369758	C	CAL0001672	Predicted lipid-binding ER protein; involved in ER-plasma membrane tethering; Spider biofilm induced
3.38854	orf19.2352		orf19.9888|IPF24994.1|IPF13379.2|Contig4-2380_0004|orf6.4200|CA2337|CaO19.2352|CaO19.9888|IPF13379	ORF|Uncharacterized	Ca21chr1_C_albicans_SC5314	2374045	2375019	W	CAL0000750	Protein of unknown function
3.38854	orf19.2351	NIT3	orf19.9887|IPF24993.1|IPF13378.1|Contig4-2380_0005|orf6.4201|CA2338|CaO19.9887|CaO19.2351	ORF|Uncharacterized	Ca21chr1_C_albicans_SC5314	2375969	2375064	C	CAL0000749	Putative nitrilase; regulated by Gcn2p and Gcn4p; protein present in exponential and stationary growth phase yeast cultures
3.38854	orf19.2350		orf19.9886|IPF13377|IPF24976.1|IPF13377.2|Contig4-2380_0006|Contig4-2380_0007|orf6.4202|YOR378W|CA2339|CaO19.2350|CaO19.9886	ORF|Verified	Ca21chr1_C_albicans_SC5314	2377776	2376214	C	CAL0000747	Protein similar to S. cerevisiae Yor378w; MFS family transporter; transposon mutation affects filamentous growth; null mutants are viable; fungal-specific (no human or murine homolog)
3.38854	orf19.2347	MNN2	orf19.9883|IPF19382.2|IPF15847.2|orf6.233|orf6.4205|CA2340|MNN5|CaO19.2347|MNN25	ORF|Verified	Ca21chr1_C_albicans_SC5314	2380617	2378824	C	CAL0000743	Alpha-1,2-mannosyltransferase; similar to S. cerevisiae Mnn2; role in cell wall integrity, temperature sensitivity; iron utilization in low iron; Tn mutation affects filamentous growth; filament induced; increased chitin exposes beta-glucan
3.38854	orf19.2346		orf19.9882|IPF24974.1|IPF13838.2|Contig4-3011_0001|orf6.4206|CA2341|CaO19.9882|FMP40|CaO19.2346|IPF13838	ORF|Uncharacterized	Ca21chr1_C_albicans_SC5314	2381550	2383424	W	CAL0000742	Putative protein of unknown function, transcription is positively regulated by Tbf1p
3.38854	orf19.2344	ASR1	CaO19.2344|DHN6|orf19.9880|IPF24991.1|IPF13836.2|Contig4-3011_0003|orf6.4208|CA2342|IPF13836	ORF|Uncharacterized	Ca21chr1_C_albicans_SC5314	2384713	2383556	C	CAL0000739	Heat shock protein; transcript regulated by cAMP, osmotic stress, ciclopirox olamine, ketoconazole; repressed by Cyr1, Ras1; colony morphology-related regulated by Ssn6; stationary phase enriched; Hap43-induced; Spider biofilm induced
3.38854	orf19.2343.1			ORF|Uncharacterized	Ca21chr1_C_albicans_SC5314	2386841	2386378	C	CAL0120620	Putative vacuolar H+ ATPase subunit e of the V-ATPase V0 subcomplex; added to Assembly 21 based on comparative genome analysis
3.38854	orf19.2343	VPS23	orf19.9879|IPF24985.1|IPF8671.2|Contig4-3011_0008|orf6.4209|CA2343|CaO19.9879|CaO19.2343|IPF8671	ORF|Verified	Ca21chr1_C_albicans_SC5314	2386859	2388307	W	CAL0000738	ESCRT I protein sorting complex protein; involved in proteolytic activation of Rim101, which regulates pH response; ortholog of S. cerevisiae Stp22/Vps23
3.38854	orf19.2342	SFT2	orf19.9878|IPF25003.1|IPF8674.2|Contig4-3011_0009|orf6.4210|CA2344|SFT22|CaO19.2342|CaO19.9878|SFT21	ORF|Uncharacterized	Ca21chr1_C_albicans_SC5314	2388535	2389188	W	CAL0000736	Putative membrane protein; transcript regulated by Mig1; Spider biofilm induced
3.38854	orf19.2341	HNT1	orf19.9877|IPF25010.1|IPF8675.2|Contig4-3011_0010|orf6.4211|CA2345|CaO19.2341|CaO19.9877	ORF|Uncharacterized	Ca21chr1_C_albicans_SC5314	2389729	2389271	C	CAL0000734	Protein with similarity to protein kinase C inhibitor-I; protein level decreases in stationary phase cultures
3.38854	orf19.2340	CDC48	CaO19.2340|orf19.9876|IPF8680.2|IPF29137.1|Contig4-3011_0012|orf6.5568|CA3333|CaO19.9876	ORF|Verified	Ca21chr1_C_albicans_SC5314	2390766	2393246	W	CAL0000732	Putative microsomal ATPase; plasma membrane-localized; regulated by Gcn2 and Gcn4; induced by amino acid starvation (3-AT); macrophage/pseudohyphal-repressed; protein levels decrease in stationary phase yeast; Spider biofilm repressed
3.38854	orf19.2337	ALP1	orf19.9873|IPF24975.1|IPF8681.1|Contig4-3011_0014|orf6.5571|CA3334|LYP2|CaO19.9873|CaO19.2337|CYN1	ORF|Verified	Ca21chr1_C_albicans_SC5314	2395239	2393608	C	CAL0000727	Cystine transporter; present in pathogenic yeasts (no human or murine homolog); Spider biofilm induced
3.38854	orf19.2336		CaO19.9872|orf19.9872|IPF25004.1|IPF8682.1|Contig4-3011_0016|orf6.5572|CA3335|IPF8682|CaO19.2336	ORF|Uncharacterized	Ca21chr1_C_albicans_SC5314	2396292	2396900	W	CAL0000726	Pry family pathogenesis-related protein; predicted to be extracellular
3.38854	orf19.2335		orf19.9871|IPF24979.1|IPF19983.1|Contig4-3011_0017|orf6.5573|CA3336|IPF19983|CaO19.2335|CaO19.9871	ORF|Verified	Ca21chr1_C_albicans_SC5314	2398373	2396883	C	CAL0000724	Putative aspartyl aminopeptidase; stationary phase enriched protein; mutation confers hypersensitivity to 5-fluorouracil (5-FU); Hog1-induced; planktonic growth-induced; rat catheter and Spider biofilm repressed
3.38854	orf19.2334	BIG1	orf19.9870|IPF24995.1|IPF13583.2|Contig4-3011_0019|orf6.5574|CA3337|CaO19.2334|IPF13583|CaO19.9870	ORF|Verified	Ca21chr1_C_albicans_SC5314	2398600	2399568	W	CAL0000722	Endoplasmic reticulum (ER) protein; ortholog of S. cerevisiae Big1; required for beta-1,6-glucan synthesis, filamentation, adhesion, and virulence; rat catheter biofilm repressed
3.38854	orf19.2333		orf19.9869|IPF24983.1|IPF13582.2|Contig4-3011_0021|orf6.5575|CA3338|CaO19.9869|CaO19.2333|IPF13582	ORF|Uncharacterized	Ca21chr1_C_albicans_SC5314	2401214	2399724	C	CAL0000720	Protein of unknown function
3.38854	orf19.2332		orf19.9868|IPF24999.1|IPF20131.1|Contig4-2080_0004|Contig4-3011_0030|orf6.5576|CA3339|CaO19.2332|CaO19.9868|IPF20131	ORF|Uncharacterized	Ca21chr1_C_albicans_SC5314	2403598	2404392	W	CAL0000718	Protein of unknown function
3.38854	orf19.2331	ADA2	orf19.9867|IPF24987.1|IPF15288.1|Contig4-2080_0003|orf6.5577|CA3340|CAS3|CaO19.9867|CaO19.2331	ORF|Verified	Ca21chr1_C_albicans_SC5314	2405785	2404448	C	CAL0000716	Zinc finger and homeodomain transcriptional coactivator; role in cell wall integrity and in sensitivity to caspofungin; required for the normal transcriptional response to caspofungin; required for yeast cell adherence to silicone substrate
3.38854	orf19.2329.1	RPS17B	IPF25018.1|IPF15290.2|Contig4-2080_0001|CA3341|RPS17|RPS17.3	ORF|Uncharacterized	Ca21chr1_C_albicans_SC5314	2406592	2407384	W	CAF0006947	Ribosomal protein 17B; downregulated upon phagocytosis by murine macrophages; Hap43-induced; Spider biofilm repressed
3.38854	orf19.2330		orf19.9866|IPF24986.1|IPF13361.2|orf6.5578|YOR205C|CA3342|CaO19.9866|UTP6|CaO19.2330|IPF13361	ORF|Verified	Ca21chr1_C_albicans_SC5314	2407857	2409152	W	CAL0000714	Putative U3 snoRNA-associated protein; Hap43-induced; transposon mutation affects filamentous growth; repressed by prostaglandins
3.38854	orf19.2328		CaO19.9864|orf19.9864|IPF24998.1|IPF13360.2|Contig4-2414_0001|orf6.5580|CA3343|IPF13360|CaO19.2328	ORF|Uncharacterized	Ca21chr1_C_albicans_SC5314	2409985	2409149	C	CAL0000701	Protein of unknown function
3.38854	tI(UAU)1	tI(UAU)1	tI(UAU)1.2|tI(TAT)1	tRNA|Uncharacterized	Ca21chr1_C_albicans_SC5314	2410460	2410353	C	CAF0007176	tRNA-Ile, predicted by tRNAscan-SE; UAU anticodon
3.38854	orf19.2326		orf19.9862|IPF24982.1|IPF13359.2|Contig4-2414_0003|Contig4-2414_0004|orf6.5582|CA3344|CaO19.2326|ESC2|CaO19.9862|IPF13359	ORF|Uncharacterized	Ca21chr1_C_albicans_SC5314	2412442	2410985	C	CAL0000700	Protein of unknown function
3.38854	orf19.2325		orf19.9861|IPF24978.1|IPF13357.2|Contig4-2414_0006|orf6.5583|CA3345|TFC6|CaO19.2325|IPF13357|CaO19.9861	ORF|Uncharacterized	Ca21chr1_C_albicans_SC5314	2412665	2414218	W	CAL0000698	Protein of unknown function
3.38854	orf19.2324	UBA4	orf19.9860|IPF24989.1|IPF13356.2|Contig4-2414_0007|orf6.5584|CA3346|CaO19.9860|CaO19.2324|IPF13356	ORF|Uncharacterized	Ca21chr1_C_albicans_SC5314	2415599	2414283	C	CAL0000697	Putative ubiquitin activating protein; Hap43-repressed; induced by prostaglandins; clade-associated gene expression
3.38854	orf19.2322.3	ERP5	IPF25016.1|IPF15563.2|Contig4-1946_0001|CA3347	ORF|Uncharacterized	Ca21chr1_C_albicans_SC5314	2416629	2415911	C	CAF0006946	Protein involved in ER to Golgi transport; rat catheter and Spider biofilm repressed
3.38854	orf19.2320		orf19.9856|IPF24981.1|IPF15559.2|Contig4-1946_0004|orf6.5588|CA3348|CaO19.9856|CaO19.2320|RIO1	ORF|Uncharacterized	Ca21chr1_C_albicans_SC5314	2418349	2416868	C	CAL0000691	Putative serine/threonine-protein kinase; possibly an essential gene, disruptants not obtained by UAU1 method
3.38854	orf19.2318.1		IPF19588.1|IPF19589.2|Contig4-2539_0012|orf6.503|CA3349|IPF19588	ORF|Uncharacterized	Ca21chr1_C_albicans_SC5314	2418540	2419305	W	CAF0006945	Protein of unknown function
3.38854	orf19.2319		orf19.9855|IPF18350.2|IPF16479.2|Contig4-2539_0011|orf6.504|orf6.5589|CA0098|IPF16479|CaO19.2319	ORF|Uncharacterized	Ca21chr1_C_albicans_SC5314	2419750	2421768	W	CAL0000677	Putative nucleolar protein with a predicted role in pre-rRNA processing; Hap43-induced gene; repressed in core stress response
3.38854	orf19.2317		orf19.9853|IPF25005.1|IPF13777.1|Contig4-2539_0007|orf6.5533|CA3299|IPF13777|CaO19.9853|CaO19.2317	ORF|Uncharacterized	Ca21chr1_C_albicans_SC5314	2423366	2423899	W	CAL0000676	Protein of unknown function; induced by alpha pheromone in SpiderM medium
3.38854	orf19.2315	RTG3	orf19.9851|IPF24980.1|IPF13780.2|Contig4-2539_0004|Contig4-2539_0005|orf6.5535|CA3300|CaO19.2315|CaO19.9851	ORF|Verified	Ca21chr1_C_albicans_SC5314	2425723	2424161	C	CAL0000674	Putative transcription factor with bZIP DNA-binding motif; mutants are sensitive to cations and antifungal drugs, and defective in filamentous growth
3.38854	orf19.2314		CaO19.9850|orf19.9850|IPF25009.1|IPF13782.2|Contig4-2539_0003|orf6.5536|CA3301|CaO19.2314|IPF13782	ORF|Verified	Ca21chr1_C_albicans_SC5314	2426899	2426492	C	CAL0000672	Protein with a role in nucleolar integrity and processing of pre-rRNA; mutation confers hypersensitivity to 5-fluorocytosine (5-FC), 5-fluorouracil (5-FU), and tubercidin (7-deazaadenosine); Hap43-induced; Spider biofilm induced
3.38854	orf19.2313		orf19.9849|IPF24990.1|IPF13784.2|Contig4-2539_0001|orf6.5537|CA3302|CaO19.2313|IPF13784|CaO19.9849	ORF|Uncharacterized	Ca21chr1_C_albicans_SC5314	2428398	2427208	C	CAL0000670	Putative ortholog of S. cerevisiae Pex32 a peroxisomal integral membrane protein with a role in negative regulation of peroxisome size; Hap43-repressed gene
3.38854	orf19.2312		orf19.9848|IPF24972.1|IPF15397.2|FRE11|FRE3|FRE42|Contig4-2919_0013|orf6.5538|CA3303|CaO19.2312|CFL11|CaO19.9848	ORF|Uncharacterized	Ca21chr1_C_albicans_SC5314	2430115	2432154	W	CAL0000668	Protein similar to ferric reductase Fre10p; possibly an essential gene, disruptants not obtained by UAU1 method
3.38854	orf19.2311	RPL82	orf19.9847|IPF25000.1|IPF11736.2|Contig4-2919_0011|orf6.5539|CA3304|RPL8B-2|RPL8A|CaO19.2311|CaO19.9847	ORF|Uncharacterized	Ca21chr1_C_albicans_SC5314	2432455	2433574	W	CAL0000666	Predicted ribosomal protein; genes encoding cytoplasmic ribosomal subunits, translation factors, and tRNA synthetases are downregulated upon phagocytosis by murine macrophage
3.38854	orf19.2310.1	RPL29	IPF24965.1|IPF11737.2|CA3305	ORF|Uncharacterized	Ca21chr1_C_albicans_SC5314	2434130	2434321	W	CAL0006678	Ribosomal protein L29; induced upon germ tube formation; colony morphology-related gene regulation by Ssn6; intron in 5'-UTR; Spider biofilm repressed
3.38854	orf19.2310		orf19.9846|IPF24997.1|IPF11738.2|Contig4-2919_0009|orf6.5540|CA3306|CaO19.2310|CaO19.9846|IPF11738	ORF|Uncharacterized	Ca21chr1_C_albicans_SC5314	2434657	2435635	W	CAL0000664	Predicted single-stranded nucleic acid binding protein; flow model biofilm induced
3.38854	orf19.2309.2	RPL2	IPF11739.1|IPF19095.2|Contig4-2919_0008|CA3307|RPL2.3	ORF|Uncharacterized	Ca21chr1_C_albicans_SC5314	2437043	2435875	C	CAF0006944	Putative 60S ribosomal protein L2; Hap43-induced gene; repressed in infected rabbit kidney in SC5314, but not NGY152, strain background; Spider biofilm repressed
3.38854	orf19.2309	PET127	orf19.9845|IPF11742.2|IPF19092.1|IPF19093.1|Contig4-2919_0005|orf6.5541|orf6.943|CA3308	ORF|Uncharacterized	Ca21chr1_C_albicans_SC5314	2438200	2440317	W	CAL0000652	Protein with a predicted role in 5'-end processing of mitochondrial RNAs; ortholog of S. cerevisiae Pet127; Hap43-induced; rat catheter and Spider biofilm induced
3.38854	orf19.2308		orf19.9844|IPF8806.2|IPF19091.2|Contig4-2919_0002|orf6.5542|CA3309|CaO19.2308|IPF8806	ORF|Uncharacterized	Ca21chr1_C_albicans_SC5314	2442032	2443117	W	CAL0000651	Putative 6-phosphofructo-2-kinase; catalyzes synthesis of fructose-2,6-bisphosphate; Hap43-repressed; flow model, rat catheter and Spider biofilm induced
3.38854	orf19.2307		PFS2|CaO19.2307|orf19.9843|IPF24977.1|IPF8808.2|Contig4-2919_0001|orf6.5543|CA3310|CaO19.9843	ORF|Uncharacterized	Ca21chr1_C_albicans_SC5314	2445056	2443425	C	CAL0000650	Protein of unknown function
3.38854	orf19.2306		orf19.9842|IPF25007.1|IPF8809.2|Contig4-2749_0015|orf6.5544|CA3311|CaO19.2306|IPF8809|CaO19.9842	ORF|Uncharacterized	Ca21chr1_C_albicans_SC5314	2445609	2446145	W	CAL0000649	Protein of unknown function
3.38854	orf19.2305		GIM4|CaO19.2305|orf19.9841|IPF25017.1|IPF8810.1|Contig4-2749_0014|orf6.5545|CA3312|CaO19.9841|IPF8810	ORF|Uncharacterized	Ca21chr1_C_albicans_SC5314	2446615	2446241	C	CAL0000648	Protein of unknown function
3.38854	orf19.2304		orf19.9840|IPF24992.1|IPF8811.2|Contig4-2749_0012|orf6.5546|YIL041W|CA3313|CaO19.2304|CaO19.9840|IPF8811	ORF|Verified	Ca21chr1_C_albicans_SC5314	2447981	2446953	C	CAL0000646	Protein similar to S. cerevisiae Gvp36p; transposon mutation affects filamentous growth
3.38854	orf19.2303	FGR16	orf19.9839|IPF25001.1|IPF8812.2|Contig4-2749_0011|orf6.5547|CA3314|IPF8812|PRP38|CaO19.2303|CaO19.9839	ORF|Verified	Ca21chr1_C_albicans_SC5314	2448714	2449415	W	CAL0000644	Protein lacking an ortholog in S. cerevisiae; transposon mutation affects filamentous growth; fluconazole-downregulated
3.38854	orf19.2302		orf19.9838|IPF24984.1|IPF8814.2|Contig4-2749_0008|Contig4-2749_0009|orf6.5548|CA3315|CaO19.2302|CaO19.9838|IPF8814|CSG2	ORF|Uncharacterized	Ca21chr1_C_albicans_SC5314	2449721	2451190	W	CAL0000642	Protein of unknown function
3.38854	orf19.2301		orf19.9837|IPF25002.1|IPF8817.2|Contig4-2749_0007|CA3316|CaO19.2301|CaO19.9837|IPF8817|orf6.5549	ORF|Uncharacterized	Ca21chr1_C_albicans_SC5314	2451516	2452211	W	CAL0000640	Protein of unknown function
3.38854	orf19.2299		orf19.9835|IPF25027.1|IPF8818.2|orf6.5551|CA3317|URM1|CaO19.2299|CaO19.9835	ORF|Uncharacterized	Ca21chr1_C_albicans_SC5314	2452546	2452241	C	CAL0006418	Protein of unknown function
3.38854	orf19.2298	WBP1	orf19.9834|IPF24988.1|IPF8820.1|Contig4-2749_0003|orf6.1375|orf6.5552|CA3318|CaO19.9834|CaO19.2298	ORF|Verified	Ca21chr1_C_albicans_SC5314	2453068	2454381	W	CAL0006417	Putative oligosaccharyltransferase subunit; Spider biofilm repressed
3.38854	snR64			snoRNA|Uncharacterized	Ca21chr1_C_albicans_SC5314	2454602	2454513	C	CAL0139936	C/D box small nucleolar RNA (snoRNA)
3.38854	orf19.2297	ARL3	orf19.9833|IPF8822.3|IPF14275.1|Contig4-2749_0002|orf6.1374|orf6.5553|CA0447|CaO19.2297|IPF14275	ORF|Uncharacterized	Ca21chr1_C_albicans_SC5314	2455016	2455786	W	CAL0006416	Putative Ras superfamily GTPase; induced by nitric oxide independent of Yhb1p
3.38854	orf19.2296		orf19.9831|IPF25023.1|IPF14282.3|orf6.1373|CA0446|orf19.8300|orf6.1793|orf6.3697|orf19.682|CA0706|Contig4-2776_0014|IPF29744.1|IPF7715.3|IPF14282.5eoc|IPF14282|IPF14282.2|CaO19.2296	ORF|Uncharacterized	Ca21chr1_C_albicans_SC5314	2457135	2464790	W	CAL0006415	Predicted mucin-like protein; ketoconazole-induced; fluconazole-repressed; induced in cyr1 mutant; colony morphology-related gene regulation by Ssn6; flow model biofilm induced; Spider biofilm induced
3.38854	orf19.681	HAP43	orf19.8298|orf6.1795|IPF7711.2|IPF18253.2|Contig4-2776_0004|orf6.6574|CA0707|IPF7711|CaO19.681|CAP2	ORF|Verified	Ca21chr1_C_albicans_SC5314	2467031	2465127	C	CAL0001129	CCAAT-binding factor-dependent transcription factor; repressor; also called CAP2; required for low iron response; similar to bZIP transcription factor AP-1; repressed by Sfu1; ciclopirox olamine induced; rat catheter, Spider biofilm induced
3.38854	orf19.680	TIM50	orf19.8297|IPF18893.2|IPF7706.2|Contig4-2776_0008|orf6.1796|orf6.6573|CA4115|IPF7706|CaO19.680	ORF|Verified	Ca21chr1_C_albicans_SC5314	2469636	2468227	C	CAL0001128	Predicted component of the Translocase of the Inner Mitochondrial membrane (TIM23 complex); involved in mitochondrial protein import; Spider biofilm repressed
3.38854	orf19.679	FGR39	orf19.8296|IPF26643.1|IPF7704.2|Contig4-2776_0010|orf6.6572|CA4114|CaO19.679|CaO19.8296|IPF7704	ORF|Verified	Ca21chr1_C_albicans_SC5314	2469859	2470422	W	CAL0001107	Protein lacking an ortholog in S. cerevisiae; transposon mutation affects filamentous growth
3.38854	orf19.677	CHO1	orf19.8294|IPF26635.1|IPF7703.2|Contig4-2776_0011|orf6.6570|CA4113|CaO19.8294|CaO19.677	ORF|Verified	Ca21chr1_C_albicans_SC5314	2471379	2470558	C	CAL0001102	Putative phosphatidylserine synthase; ortholog of S. cerevisiae CHO1; transposon mutation affects filamentous growth; regulated by Nrg1, Tup1
3.38854	orf19.676		orf19.8293|IPF26634.1|IPF7699.2|Contig4-2917_0021|orf6.6569|CA4112|CaO19.676|BIM1|CaO19.8293	ORF|Uncharacterized	Ca21chr1_C_albicans_SC5314	2472723	2473619	W	CAL0001099	Microtubule-binding protein of the cortical microtubule; delays exit from mitosis when the spindle is abnormally oriented; Spider biofilm repressed
3.38854	orf19.675.1			ORF|Uncharacterized	Ca21chr1_C_albicans_SC5314	2474092	2473955	C	CAL0120924	Putative adhesin-like protein
3.38854	orf19.675		orf19.8292|orf6.131|IPF7692.2|IPF3964.2|Contig4-2917_0017|orf6.6568|CA4111|IPF3964|CaO19.675	ORF|Uncharacterized	Ca21chr1_C_albicans_SC5314	2475597	2476235	W	CAL0001097	Cell wall protein; induced in core stress response and core caspofungin response; iron-regulated; amphotericin B, ketoconazole, and hypoxia induced; regulated by Cyr1, Ssn6; induced in oralpharyngeal candidasis; Spider biofilm repressed
3.38854	orf19.674		CWC2|CaO19.8291|orf19.8291|IPF26630.1|IPF3965.2|Contig4-2917_0014|orf6.6567|CA4110|IPF3965|CaO19.674	ORF|Uncharacterized	Ca21chr1_C_albicans_SC5314	2476813	2477904	W	CAL0001095	Protein of unknown function
3.38854	orf19.673		CaO19.8290|OYE98|CaO19.673|orf19.8290|IPF26633.1|IPF3967.2|Contig4-2917_0012|orf6.6566|CA4109|IPF3967	ORF|Uncharacterized	Ca21chr1_C_albicans_SC5314	2478125	2479234	W	CAL0001092	Protein of unknown function
3.38854	orf19.672		orf19.8289|IPF26626.1|IPF3968.1|Contig4-2917_0010|Contig4-2917_0011|orf6.6565|CA4108|CaO19.8289|PRP28|CaO19.672|IPF3968	ORF|Uncharacterized	Ca21chr1_C_albicans_SC5314	2480984	2479239	C	CAL0001091	Protein of unknown function
3.38854	orf19.671	PSP1	CaO19.671|orf19.8288|IPF26617.1|IPF3970.2|Contig4-2917_0009|orf6.6564|CA4107|IPF3970	ORF|Uncharacterized	Ca21chr1_C_albicans_SC5314	2483510	2481501	C	CAL0001090	Protein repressed during the mating process
3.38854	orf19.670.2		IPF26615.1|IPF20159.1|CA4106|IPF20159	ORF|Uncharacterized	Ca21chr1_C_albicans_SC5314	2485587	2485275	C	CAF0006908	Protein of unknown function; hypoxia, Hap43-repressed; ketoconazole induced; induced in oralpharyngeal candidasis; 16h flow model biofilm repressed, late-stage flow model biofilm induced; rat catheter and Spider biofilm induced
3.38854	orf19.670	SMT3	orf19.8287|IPF26656.1|IPF20158.1|Contig4-2322_0001|Contig4-2917_0002|orf6.6563|CA4105|CaO19.8287|CaO19.670	ORF|Verified	Ca21chr1_C_albicans_SC5314	2487456	2487148	C	CAL0001089	SUMO, small ubiquitin-like protein; Smt3p-conjugated proteins localize to septation site and mother side of bud neck; C. albicans septins appear not to be Smt3p-modified, in contrast to S. cerevisiae septins
3.38854	orf19.669	PRM1	CaO19.8286|orf19.8286|IPF26621.1|IPF20157.1|Contig4-2322_0003|Contig4-2322_0006|orf6.6562|CA4104|IPF20157|CaO19.669	ORF|Uncharacterized	Ca21chr1_C_albicans_SC5314	2487975	2489846	W	CAL0001069	Putative membrane protein with a predicted role in membrane fusion during mating; Hap43p-repressed gene; protein induced during the mating process
3.38854	orf19.668	TOS4	orf19.8285|IPF26628.1|IPF3980.2|Contig4-2322_0007|orf6.6561|CA4103|CaO19.8285|IPF3980|CaO19.668	ORF|Uncharacterized	Ca21chr1_C_albicans_SC5314	2491386	2489908	C	CAL0001066	Putative fork-head transcription factor; rat catheter and Spider biofilm repressed
3.38854	orf19.667.1	RPL37B	IPF26651.1|IPF20156.1|Contig4-2094_0006|CA4102	ORF|Uncharacterized	Ca21chr1_C_albicans_SC5314	2492138	2492762	W	CAF0006907	Ribosomal protein L37; Hap43-induced; Spider biofilm repressed
3.38854	orf19.666		orf19.8283|IPF26629.1|IPF26636.1|IPF3984.2|IPF3985.2|Contig4-2094_0003|Contig4-2094_0005|Contig4-2322_0011|orf6.6559|orf6.6560|CA4100|orf19.8284|orf19.667|CA4101|IPF3985	ORF|Uncharacterized	Ca21chr1_C_albicans_SC5314	2495200	2493020	C	CAL0001061	Essential protein required for the DNA integrity checkpoint pathway; Spider biofilm induced
3.38854	orf19.665	NEP1	orf19.8282|IPF26637.1|IPF3986.2|Contig4-2094_0002|orf6.6558|CA4099|IPF3986|CaO19.665|CaO19.8282	ORF|Verified	Ca21chr1_C_albicans_SC5314	2495756	2496559	W	CAL0001059	Protein of unknown function
3.38854	orf19.664		orf19.8281|IPF26638.1|IPF3988.2|orf6.6557|CA4098|CaO19.664|CaO19.8281|IPF3988	ORF|Uncharacterized	Ca21chr1_C_albicans_SC5314	2497091	2497825	W	CAL0001056	Protein of unknown function
3.38854	orf19.663	GIN4	orf19.8280|IPF26652.1|IPF3994.2|Contig4-2788_0002|orf6.6556|CA4097|CaO19.663|CaO19.8280	ORF|Verified	Ca21chr1_C_albicans_SC5314	2501997	2497948	C	CAL0001054	Autophosphorylated kinase; role in pseudohyphal-hyphal switch and cytokinesis; phosphorylates Cdc11p on S395; necessary for septin ring within germ tube but not for septin band at mother cell junction; physically associates with septins
3.38854	orf19.8278			ORF|Uncharacterized	Ca21chr1_C_albicans_SC5314	2503966	2503625	C	CAL0120984	Predicted ORF from original SGTC Assembly 19 annotation, removed from the reduced ORF set by the SGTC; subsequently reinstated in Assembly 21 based on comparative genome analysis
3.38854	orf19.661	KRR1	orf19.8277|IPF3997.3|IPF4000.2|Contig4-2788_0008|orf6.254|orf6.6554|CA4096|CaO19.661	ORF|Uncharacterized	Ca21chr1_C_albicans_SC5314	2504197	2505273	W	CAL0001053	Putative nucleolar protein; repressed benomyl treatment or in an azole-resistant strain that overexpresses MDR1; F-12/CO2 early biofilm induced
3.38854	orf19.660		orf19.8276|IPF26622.1|IPF4002.2|Contig4-2788_0013|orf6.6553|CA4095|CaO19.660|CaO19.8276|IPF4002	ORF|Uncharacterized	Ca21chr1_C_albicans_SC5314	2506221	2508167	W	CAL0001052	Protein of unknown function; mRNA binds She3
3.38854	orf19.658	GIN1	orf19.8274|IPF4004|IPF16455.3|IPF4004.2|Contig4-2788_0014|orf6.2188|orf6.6551|CA4094|MRC1|CaO19.658	ORF|Verified	Ca21chr1_C_albicans_SC5314	2511975	2508271	C	CAL0001036	Protein involved in regulation of DNA-damage-induced filamentous growth; putative component of DNA replication checkpoint; ortholog of S. cerevisiae Mrc1p, an S-phase checkpoint protein; Hap43p-induced gene
3.38854	orf19.657	SAM2	orf19.8272|IPF26631.1|IPF15535.2|Contig4-2279_0002|orf6.2190|CA0959|CaO19.8272|CaO19.657	ORF|Verified	Ca21chr1_C_albicans_SC5314	2514777	2513620	C	CAL0001034	S-adenosylmethionine synthetase; localizes to surface of hyphae, not yeast cells; alkaline, Hog1-induced; farnesol-downregulated; F-12/CO2 early biofilm induced; Spider biofilm repressed
3.38854	iota-1a		iota	long_terminal_repeat	Ca21chr1_C_albicans_SC5314	2516416	2516663	W	CAL0121137	Long terminal repeat (LTR); about 251 bp long, 13 copies per genome
3.38854	orf19.656	DPP1	orf19.8271|IPF5432.1|IPF29743.1|Contig4-2315_0005|orf6.2191|CA0960|CaO19.656|CaO19.8271	ORF|Uncharacterized	Ca21chr1_C_albicans_SC5314	2518372	2517587	C	CAL0001032	Putative diacylglycerol pyrophosphate phosphatase of diacylglycerol production for phospholipid biosynthesis; downregulation correlates with clinical development of fluconazole resistance
3.38854	orf19.655	PHO84	orf19.8269|IPF26640.1|IPF5438.2|orf6.447|CA0083|orf6.3437|orf19.8765|orf19.1172|CA1782|IPF26171.1|IPF7638.2|PHO84.5eoc	ORF|Uncharacterized	Ca21chr1_C_albicans_SC5314	2522395	2524032	W	CAL0001031	High-affinity phosphate transporter; transcript regulated by white-opaque switch; Hog1, ciclopirox olamine or alkaline induced; caspofungin, stress repressed; upregulated in RHE model; Spider and flow model biofilm induced, Hap43-induced
3.38854	orf19.1171	BTA1	orf19.8764|IPF26156.1|IPF7635.2|Contig4-2602_0002|orf6.3438|CA1783|CaO19.8764|CaO19.1171|IPF7635	ORF|Uncharacterized	Ca21chr1_C_albicans_SC5314	2527061	2524803	C	CAL0002093	Protein of unknown function
3.38854	orf19.1170	ARO7	orf19.8763|IPF26168.1|IPF7632.1|Contig4-2602_0006|orf6.3439|CA1784|CaO19.1170|CaO19.8763	ORF|Uncharacterized	Ca21chr1_C_albicans_SC5314	2529344	2528538	C	CAL0002091	Putative chorismate mutase; fungal-specific (no human or murine homolog); alkaline upregulated
3.38854	orf19.1169		orf19.8762|IPF26167.1|IPF7631.2|Contig4-2602_0008|orf6.3440|CA1785|JID1|CaO19.1169|CaO19.8762|IPF7631	ORF|Uncharacterized	Ca21chr1_C_albicans_SC5314	2530577	2529627	C	CAL0002076	Putative DnaJ-like molecular chaperone; Spider biofilm induced
3.38854	orf19.1168	ZCF3	orf19.8761|IPF7629.2|Contig4-2602_0009|orf6.3441|CA1786|CaO19.1168|CaO19.8761|IPF7629	ORF|Verified	Ca21chr1_C_albicans_SC5314	2531948	2531361	C	CAL0002075	Zn(II)2Cys6 domain transcription factor; required for filamentous growth, resistance to rapamycin and flucytosine; possibly an essential gene, disruptants not obtained by UAU1 method; Hap43-repressed; Spider and flow model biofilm induced
3.38854	orf19.1167		TCD1|CaO19.8760|orf19.8760|IPF26164.1|IPF19929.1|Contig4-2394_0007|Contig4-2602_0012|orf6.3442|CA1787|CaO19.1167|IFH3	ORF|Uncharacterized	Ca21chr1_C_albicans_SC5314	2533618	2532458	C	CAL0002074	Protein of unknown function
3.38854	orf19.1166	CTA3	orf19.8759|IPF26181.1|IPF7623.2|Contig4-2394_0005|Contig4-2394_0006|orf6.3443|CA1788|EDE1|USO1.3	ORF|Verified	Ca21chr1_C_albicans_SC5314	2538201	2534209	C	CAL0002073	Protein similar to S. cerevisiae Ede1p, which is involved in endocytosis; activates transcription in 1-hybrid assay in S. cerevisiae
3.38854	orf19.1164	GAR1	orf19.8757|IPF13076.1|IPF7621.1|Contig4-2109_0005|Contig4-2394_0002|orf6.1613|orf6.3445|CA1789|CaO19.1164	ORF|Verified	Ca21chr1_C_albicans_SC5314	2538599	2539159	W	CAL0002072	Putative H/ACA snoRNP pseudouridylase complex protein; mutation confers hypersensitivity to tubercidin (7-deazaadenosine); macrophage/pseudohyphal-induced; Spider biofilm repressed
3.38854	orf19.1163		orf19.8756|IPF13079.1|IPF7620.2|Contig4-2109_0003|orf6.1612|orf6.3446|CA0590|CaO19.8756|IPF13079|CaO19.1163	ORF|Uncharacterized	Ca21chr1_C_albicans_SC5314	2540436	2539345	C	CAL0002071	Protein of unknown function
3.38854	orf19.1162.1		IPF26174.1|IPF13080.1|Contig4-2109_0002|CA0589|IPF13080	ORF|Uncharacterized	Ca21chr1_C_albicans_SC5314	2540598	2541211	W	CAF0006922	Protein of unknown function
3.38854	orf19.1162		orf19.8755|IPF18931.2|IPF13081.2|Contig4-2109_0001|orf6.1611|CA0588|IPF13081|CaO19.8755|DOP99|CaO19.1162	ORF|Uncharacterized	Ca21chr1_C_albicans_SC5314	2541437	2541814	W	CAL0002070	Protein of unknown function; transcript upregulated by benomyl treatment
3.38854	orf19.1161	PLD1	CaO19.1161|orf19.8753|IPF13085.3|IPF29560.1|orf6.1610|orf6.3136|CA0587|SPO14|CA1571|SPO14.3eoc|IPF7619.1|SPO14.5eoc|IPF13085.2	ORF|Verified	Ca21chr1_C_albicans_SC5314	2542332	2547464	W	CAL0002069	Phospholipase D1; required for phosphatidic acid and for most diacylglycerol production; required for wild-type mouse virulence, but not rat oral virulence; mutant defect in hyphal growth on solid substrates; similar to S. cerevisiae Spo14p
3.38854	orf19.1160		orf19.8752|IPF26172.1|IPF7617.2|Contig4-2834_0013|orf6.3135|CA1570|CaO19.8752|IPF7617|CaO19.1160	ORF|Uncharacterized	Ca21chr1_C_albicans_SC5314	2547774	2548421	W	CAL0002067	Protein of unknown function
3.38854	orf19.1159		orf19.8751|IPF26162.1|IPF7616.2|Contig4-2834_0012|orf6.3134|CA1569|CYS1|CaO19.8751|IPF7616|CaO19.1159	ORF|Uncharacterized	Ca21chr1_C_albicans_SC5314	2549999	2548479	C	CAL0002052	Protein similar to A. nidulans CysA serine O-trans-acetylase; suggests that C. albicans uses an O-acetyl-serine (OAS) pathway of sulfur assimilation; F-12/CO2 early biofilm induced; Spider biofilm induced
3.38854	orf19.1158		orf19.8750|IPF26169.1|IPF7615.1|Contig4-2834_0010|orf6.3133|CA1568|IPF7615|CaO19.8750|CaO19.1158	ORF|Uncharacterized	Ca21chr1_C_albicans_SC5314	2550177	2551070	W	CAL0002051	Ortholog of S. cerevisiae Yft2 required for normal ER membrane biosynthesis; Hap43-repressed gene
3.38854	orf19.1156	FUS1	orf19.8748|IPF26166.1|IPF7613.1|Contig4-2834_0008|orf6.3131|CA1567|CaO19.1156|CaO19.8748|IPF7613	ORF|Uncharacterized	Ca21chr1_C_albicans_SC5314	2552283	2551129	C	CAL0002050	Membrane protein required for mating; ortholog of S. cerevisiae Fus1; transcript induced by Cph1 in cells homozygous for the MTLa locus; alpha factor induced
3.38854	orf19.1155	DPP2	orf19.8747|IPF26170.1|IPF7611.1|Contig4-2834_0007|orf6.3130|CA1566|DPP1|CaO19.1155|CaO19.8747	ORF|Uncharacterized	Ca21chr1_C_albicans_SC5314	2553583	2552729	C	CAL0002048	Protein similar to S. cerevisiae pyrophosphate phosphatase Lpp1p; possible role in farnesol biosynthesis
3.38854	orf19.1154	EGD1	orf19.8746|IPF26175.1|IPF7610.1|Contig4-2834_0004|orf6.3129|CA1565|CaO19.8746|CaO19.1154	ORF|Uncharacterized	Ca21chr1_C_albicans_SC5314	2554317	2554790	W	CAL0002046	Putative GAL4 DNA-binding enhancer protein; soluble protein in hyphae; biofilm induced; macrophage/pseudohyphal-induced; equal level of protein in exponential and stationary growth phase yeast cultures; Spider biofilm repressed
3.38854	orf19.1153	GAD1	orf19.8745|IPF11712.3|IPF7609.1|Contig4-2834_0001|orf6.2779|orf6.3128|CA1564|CaO19.1153	ORF|Uncharacterized	Ca21chr1_C_albicans_SC5314	2555881	2557587	W	CAL0002044	Putative glutamate decarboxylase; alkaline, macrophage-downregulated gene; amphotericin B induced; induced by Mnl1 under weak acid stress; stationary phase enriched protein; rat catheter biofilm repressed
3.38854	orf19.1152		IPF11713.1|IPF19733.2|Contig4-2773_0002|orf6.2780|orf6.3127|CA6184|orf19.8744|orf19.1151|CA1330|IPF29561.1|CaO19.1152|IPF11713.5f	ORF|Uncharacterized	Ca21chr1_C_albicans_SC5314	2558395	2559192	W	CAL0002042	Protein of unknown function; induced in core stress response; Gcn2 and Gcn4 regulated; flow model biofilm induced; Spider biofilm induced
3.38854	orf19.1150.1		IPF26154.1|IPF11714.1|CA1331|IPF11714	ORF|Uncharacterized	Ca21chr1_C_albicans_SC5314	2559483	2559262	C	CAF0006919	Protein of unknown function
3.38854	orf19.1150		orf19.8743|IPF26163.1|IPF11716.1|Contig4-2773_0006|orf6.2781|CA1332|CaO19.8743|IPF11716|CaO19.1150	ORF|Uncharacterized	Ca21chr1_C_albicans_SC5314	2561059	2562477	W	CAL0002036	GATA-like transcription factor; oral infection induced; mutant has reduced capacity to damage oral epithelial cells; regulated by Gcn2 and Gcn4; Spider biofilm induced
3.38854	orf19.1149	MRF1	orf19.8742|IPF11717.2|IPF14722.3|Contig4-2773_0007|orf6.100|orf6.2782|CA1333|ETR2|CaO19.1149	ORF|Uncharacterized	Ca21chr1_C_albicans_SC5314	2563794	2562715	C	CAL0002010	Putative mitochondrial respiratory protein; induced by farnesol, benomyl, nitric oxide, core stress response; oxidative stress-induced via Cap1; stationary-phase enriched protein; Spider biofilm induced
3.38854	orf19.1148		CaO19.1148|CIS312|orf19.8740|IPF19912.1|IPF29559.1|Contig4-2773_0009|orf6.2784|CA1334|IPF19912	ORF|Uncharacterized	Ca21chr1_C_albicans_SC5314	2565578	2564787	C	CAL0002009	Protein of unknown function
3.38854	orf19.1146		IPF29564.1|CaO19.1146	ORF|Uncharacterized	Ca21chr1_C_albicans_SC5314	2568243	2568611	W	CAL0002008	Protein of unknown function
3.38854	orf19.1144		CaO19.1144|orf19.8737|IPF26180.1|IPF13166.3|Contig4-2773_0012|orf6.2172|orf6.2787|CA0953|IPF13166|IPF13166.3eoc|IPF13166.2	ORF|Uncharacterized	Ca21chr1_C_albicans_SC5314	2568844	2572209	W	CAL0002006	Protein with SEL-1 like protein domain; early-stage flow model biofilm induced
3.38854	orf19.1143		orf19.8736|IPF26165.1|IPF20069.1|orf6.2173|CA6246|CaO19.8736|IPF20069|CaO19.1143	ORF|Uncharacterized	Ca21chr1_C_albicans_SC5314	2572640	2573824	W	CAL0002005	Protein of unknown function
3.38854	orf19.1142	AVT4	AVT41|CaO19.1142|orf19.8735|IPF26160.1|IPF13162.2|Contig4-2171_0004|Contig4-2171_0005|orf6.2174|CA0954|CaO19.8735|IPF13162	ORF|Uncharacterized	Ca21chr1_C_albicans_SC5314	2574824	2576743	W	CAL0002003	Putative vacuolar transporter of large neutral amino acids; induced by alpha pheromone in SpiderM medium
3.38854	orf19.1140		orf19.8733|IPF17749.2|IPF13160.2|Contig4-2171_0003|orf6.2176|CA0955|CaO19.1140|IPF13160	ORF|Uncharacterized	Ca21chr1_C_albicans_SC5314	2577590	2576964	C	CAL0001998	Protein of unknown function; Spider biofilm repressed
3.38854	orf19.1139		orf19.8732|IPF17015.2|IPF29554.1|Contig4-2171_0008|orf6.1575|orf6.2177|CA0570|CaO19.1139|SVL3	ORF|Uncharacterized	Ca21chr1_C_albicans_SC5314	2581086	2578162	C	CAL0001968	Protein of unknown funtion; S. cerevisiae ortholog Svl3 plays a role in endocytosis and is localized to the bud neck; Spider biofilm induced
3.38854	snR8a			snoRNA|Uncharacterized	Ca21chr1_C_albicans_SC5314	2583867	2583978	W	CAL0126274	H/ACA box small nucleolar RNA (snoRNA)
3.38854	orf19.1137		orf19.8730|IPF16571.2|IPF4687.1|Contig4-2562_0007|orf6.1573|orf6.783|CA0569|CDC8|CaO19.1137	ORF|Uncharacterized	Ca21chr1_C_albicans_SC5314	2584210	2584884	W	CAL0001967	Protein of unknown function
3.38854	orf19.1136		orf19.8729|IPF16570.2|IPF4688.1|Contig4-2562_0006|orf6.1572|orf6.782|CA0568|APS2|CaO19.1136	ORF|Uncharacterized	Ca21chr1_C_albicans_SC5314	2585384	2584947	C	CAL0001966	Protein of unknown function
3.38854	orf19.1135	CAS1	orf19.8728|IPF19699.2|IPF20050.1|Contig4-2562_0005|orf6.1571|orf6.1909|orf6.781|IPF20065.1|orf19.3491|CA0779|CaO19.1135|YKU701	ORF|Verified	Ca21chr1_C_albicans_SC5314	2585659	2588094	W	CAL0001964	Putative transcription factor with Ku70/Ku80 beta-barrel DNA-binding motif; involved in telomerase regulation and telomere protection; mutation causes marginal increase in caspofungin sensitivity
3.38854	tY(GUA)1	tY(GUA)1	tY(GUA)1.2|tY(GTA)1	tRNA|Uncharacterized	Ca21chr1_C_albicans_SC5314	2588713	2588821	W	CAF0007256	tRNA-Tyr, predicted by tRNAscan-SE; GUA anticodon
3.38854	tY(GUA)4	tY(GUA)4	tY(GTA)4	tRNA|Uncharacterized	Ca21chr1_C_albicans_SC5314	2589199	2589292	W	CAF0007259	tRNA-Tyr, predicted by tRNAscan-SE; GUA anticodon
3.38854	zeta-1a		zeta	long_terminal_repeat	Ca21chr1_C_albicans_SC5314	2590792	2591299	W	CAL0121138	Long terminal repeat (LTR) associated with the transposon Tca7; about 508 bp long, 10-15 copies per genome
3.38854	orf19.5282		orf19.12747|IPF4696|IPF21944.1|IPF4696.2|Contig4-3082_0045|orf6.7660|CA4970|CaO19.12747|CaO19.5282	ORF|Uncharacterized	Ca21chr1_C_albicans_SC5314	2593345	2594787	W	CAL0003643	Protein of unknown function; Hap43-repressed gene; mRNA binds to She3; repressed in hyphae; Efg1 and Efh1 regulated; 5'-UTR intron; induced by Mnl1 under weak acid stress; rat catheter biofilm induced
3.38854	orf19.5281		orf19.12746|IPF21985.1|IPF4697.2|Contig4-3082_0043|orf6.7661|CA4971|CaO19.12746|CaO19.5281|SCP160|IPF4697	ORF|Uncharacterized	Ca21chr1_C_albicans_SC5314	2595379	2599041	W	CAL0003641	Predicted essential RNA-binding G protein; ortholog an effector of mating response pathway in S. cerevisiae; mainly associated with nuclear envelope and ER; flow model and Spider biofilm repressed
3.38854	orf19.5280	MUP1	orf19.12745|IPF21939.1|IPF4701.2|Contig4-3082_0038|orf6.7662|CA4972|CaO19.5280|CaO19.12745	ORF|Uncharacterized	Ca21chr1_C_albicans_SC5314	2600273	2601934	W	CAL0003639	Putative high affinity methionine permease; alkaline upregulated by Rim101; Spider biofilm induced
3.38854	orf19.5279		orf19.12744|IPF21976.1|IPF4703.2|Contig4-3082_0036|orf6.7663|CA4973|CaO19.5279|MRPL51|IPF4703|CaO19.12744	ORF|Uncharacterized	Ca21chr1_C_albicans_SC5314	2602277	2602699	W	CAL0003624	Protein of unknown function
3.38854	orf19.5278		orf19.12743|IPF21955.1|IPF4704.1|Contig4-3082_0035|orf6.7664|CA4974|CaO19.5278|CMD2|IPF4704|CaO19.12743	ORF|Uncharacterized	Ca21chr1_C_albicans_SC5314	2603198	2604226	W	CAL0003623	Protein of unknown function; Spider biofilm induced
3.38854	orf19.5277		orf19.12742|IPF21953.1|IPF4706.1|Contig4-3082_0034|orf6.7665|CA4975|CaO19.5277|IPF4706|CaO19.12742	ORF|Uncharacterized	Ca21chr1_C_albicans_SC5314	2605624	2604401	C	CAL0003622	Protein of unknown function
3.38854	orf19.5276		orf19.12741|IPF21952.1|IPF4708.1|Contig4-3082_0031|orf6.7666|CA4976|CaO19.5276|THP1|IPF4708|CaO19.12741	ORF|Uncharacterized	Ca21chr1_C_albicans_SC5314	2605879	2607126	W	CAL0003621	Putative nuclear pore-associated protein; Hap43p-induced gene; induced upon low-level peroxide stress; possibly an essential gene, disruptants not obtained by UAU1 method
3.38854	orf19.5275		orf19.12740|IPF21950.1|IPF4710.1|Contig4-3082_0030|orf6.7667|CA4977|CaO19.12740|IPF4710|CaO19.5275	ORF|Uncharacterized	Ca21chr1_C_albicans_SC5314	2607454	2608677	W	CAL0003620	Protein of unknown function
3.38854	orf19.5274		orf19.12739|IPF21996.1|IPF2065.2|Contig4-3082_0028|orf6.7668|CA4978|IPF2065|CaO19.12739|CAF120|CaO19.5274	ORF|Uncharacterized	Ca21chr1_C_albicans_SC5314	2610835	2613900	W	CAL0003618	Protein of unknown function
3.38854	orf19.5271		orf19.12736|IPF21938.1|IPF2062.1|Contig4-3082_0026|orf6.7671|CA4979|IPF2062|CaO19.12736|CaO19.5271	ORF|Uncharacterized	Ca21chr1_C_albicans_SC5314	2615882	2614137	C	CAL0003614	Protein of unknown function; Hap43-induced gene
3.38854	orf19.5270		orf19.12735|IPF21957.1|IPF2059.1|Contig4-3082_0023|orf6.7672|CA4980|CaO19.12735|CMD3|IPF2059|CaO19.5270	ORF|Uncharacterized	Ca21chr1_C_albicans_SC5314	2617074	2618096	W	CAL0003612	Protein of unknown function; rat catheter biofilm induced
3.38854	orf19.5269.1			ORF|Uncharacterized	Ca21chr1_C_albicans_SC5314	2618557	2618303	C	CAL0120841	Protein of unknown function
3.38854	orf19.5269		orf19.12734|IPF21945.1|IPF2057.1|Contig4-3082_0018|orf6.7673|CA4981|CaO19.12734|CaO19.5269|IPF2057	ORF|Uncharacterized	Ca21chr1_C_albicans_SC5314	2620566	2619175	C	CAL0003599	Protein of unknown function
3.38854	orf19.5268	MED10	orf19.12733|IPF21969.1|IPF2054.1|Contig4-3082_0015|orf6.7674|CA4982|CaO19.5268|NUT2|CaO19.12733	ORF|Uncharacterized	Ca21chr1_C_albicans_SC5314	2621014	2621526	W	CAL0003598	RNA polymerase II mediator complex subunit; possibly an essential gene, disruptants not obtained by UAU1 method
3.38854	orf19.5267		orf19.12732|IPF21970.1|IPF2053.1|Contig4-3082_0012|orf6.7675|CA4983|CaO19.12732|CaO19.5267|IPF2053	ORF|Uncharacterized	Ca21chr1_C_albicans_SC5314	2624074	2624559	W	CAL0003597	Putative cell wall adhesin-like protein; repressed in core caspofungin response and by alpha pheromone in SpiderM medium; transcript reduced in ace2 mutant; flow model, rat catheter and Spider biofilm repressed
3.38854	orf19.5266		orf19.12731|IPF21948.1|IPF2052.1|Contig4-3082_0011|orf6.7676|CA4984|CaO19.5266|CaO19.12731|IPF2052	ORF|Uncharacterized	Ca21chr1_C_albicans_SC5314	2626184	2624805	C	CAL0003596	Planktonic growth-induced gene
3.38854	orf19.5265	KIP4	orf19.12730|IPF21924.1|IPF2050.1|Contig4-3082_0007|Contig4-3082_0008|orf6.7677|CA4985|KINH|IPF2050|CaO19.12730|CaO19.5265|SMY1	ORF|Verified	Ca21chr1_C_albicans_SC5314	2629381	2626667	C	CAL0003594	S. cerevisiae Smy1 ortholog; Tn mutation affects filamentous growth; filament induced; has Mob2-dependent hyphal regulation; regulated by Nrg1, Tup1; oralpharyngeal candidasis induced; Spider biofilm induced; flow model biofilm repressed
3.38854	orf19.5264		CaO19.12729|orf19.12729|IPF21979.1|IPF28105.1|orf6.7678|CaO19.5264	ORF|Dubious	Ca21chr1_C_albicans_SC5314	2632107	2632532	W	CAL0003592	Dubious open reading frame
3.38854	orf19.5263	SER33	SER3|CaO19.5263|orf19.12728|IPF21949.1|IPF2046.1|Contig4-2701_0010|Contig4-2701_0011|orf6.7679|CA4986|CaO19.12728	ORF|Uncharacterized	Ca21chr1_C_albicans_SC5314	2633019	2634410	W	CAL0003590	Predicted enzyme of amino acid biosynthesis; Gcn4p-regulated; upregulated in biofilm; protein present in exponential and stationary growth phase yeast cultures; S. cerevisiae ortholog is Gcn4p regulated
3.38854	orf19.5262		orf19.12727|IPF21975.1|IPF2045.1|Contig4-2701_0009|orf6.7680|CA4987|IPF2045|CaO19.5262|CaO19.12727	ORF|Uncharacterized	Ca21chr1_C_albicans_SC5314	2634590	2635021	W	CAL0003588	Protein of unknown function
3.38854	orf19.5260	RPN2	CaO19.12725|orf19.12725|IPF21923.1|IPF2043.1|Contig4-2701_0006|Contig4-2701_0007|orf6.7682|CA4988|orf19.12726|orf19.5261|orf6.7681|CaO19.5260	ORF|Uncharacterized	Ca21chr1_C_albicans_SC5314	2635462	2638320	W	CAL0003585	Putative 26S proteasome subunit; transcript regulated by Mig1; caspofungin repressed; regulated by Gcn2 and Gcn4; gene used for strain identification by multilocus sequence typing
3.38854	orf19.5259		orf19.12724|IPF21962.1|IPF2041.2|Contig4-2701_0005|orf6.7683|CA4989|IPF2041|CaO19.12724|CaO19.5259	ORF|Uncharacterized	Ca21chr1_C_albicans_SC5314	2639142	2638423	C	CAL0003572	Protein of unknown function
3.38854	orf19.5258		orf19.12723|IPF21937.1|IPF2039.1|Contig4-2701_0004|orf6.7684|CA4990|CaO19.12723|CaO19.5258|IPF2039	ORF|Uncharacterized	Ca21chr1_C_albicans_SC5314	2641174	2639294	C	CAL0003571	Protein of unknown function; induced by nitric oxide
3.38854	orf19.5257	LCB4	orf19.12722|IPF21943.1|IPF2037.1|Contig4-2701_0001|orf6.7685|CA4991|CaO19.5257|CaO19.12722	ORF|Uncharacterized	Ca21chr1_C_albicans_SC5314	2641966	2643558	W	CAL0003570	Putative sphingosine kinase; Tac1p-regulated expression; rat catheter biofilm induced
3.38854	orf19.5256		orf19.12721|IPF21947.1|IPF2036.1|orf6.7686|CA4992|CaO19.12721|IPF2036|CaO19.5256	ORF|Uncharacterized	Ca21chr1_C_albicans_SC5314	2645045	2643690	C	CAL0003569	Protein of unknown function; Hap43-repressed gene; induced by alpha pheromone in SpiderM medium
3.38854	orf19.5255	PXA2	orf19.12720|IPF21930.1|IPF2034.2|Contig4-3107_0029|orf6.7687|CA4993|CaO19.12720|CaO19.5255	ORF|Uncharacterized	Ca21chr1_C_albicans_SC5314	2647477	2645474	C	CAL0003568	Putative peroxisomal, half-size adrenoleukodystrophy protein (ALD or ALDp) subfamily ABC transporter; Gcn4p-regulated
3.38854	orf19.5254		orf19.12719|IPF21981.1|IPF2033.1|Contig4-3067_0001|orf6.7688|CA4994|CaO19.5254|IPF2033|CaO19.12719	ORF|Uncharacterized	Ca21chr1_C_albicans_SC5314	2648269	2647889	C	CAL0003567	Protein of unknown function; repressed by nitric oxide
3.38854	orf19.5253		orf19.12718|IPF21932.1|IPF2032.1|Contig4-3067_0003|orf6.7689|CA4995|CaO19.5253|IPF2032|YAK1|CaO19.12718	ORF|Uncharacterized	Ca21chr1_C_albicans_SC5314	2648700	2650898	W	CAL0003566	Protein of unknown function
3.38854	orf19.5251	ZCF30	orf19.12716|IPF2029|IPF21928.1|IPF2029.1|Contig4-3067_0004|Contig4-3067_0005|orf6.7691|CA4996|CaO19.5251|CaO19.12716	ORF|Verified	Ca21chr1_C_albicans_SC5314	2653379	2650980	C	CAL0003564	Predicted Zn(II)2Cys6 transcription factor; mutants are viable; repressed by fluphenazine; Spider biofilm induced
3.38854	orf19.5250		orf19.12715|IPF21972.1|IPF2027.1|Contig4-3067_0008|orf6.7692|CA4997|CaO19.5250|IPF2027|CaO19.12715	ORF|Uncharacterized	Ca21chr1_C_albicans_SC5314	2653711	2654199	W	CAL0003563	Protein of unknown function
3.38854	orf19.5249		orf19.12714|IPF21966.1|IPF2026.1|Contig4-3067_0009|orf6.7693|CA4998|CaO19.5249|IPF2026|CaO19.12714	ORF|Uncharacterized	Ca21chr1_C_albicans_SC5314	2654955	2654278	C	CAL0003562	Protein of unknown function
3.38854	orf19.5248	MSO1	orf19.12713|IPF21968.1|IPF2024.1|Contig4-3067_0011|orf6.7694|CA4999|CaO19.12713|CaO19.5248|IPF2024	ORF|Uncharacterized	Ca21chr1_C_albicans_SC5314	2655623	2656132	W	CAL0003561	Putative secretory protein involved in S. cerevisiae sporulation; repressed during pseudohyphal growth in the presence of lysed macrophages; Hap43-repressed; Spider biofilm induced
3.38854	orf19.5247		orf19.12712|IPF21951.1|IPF2023.2|Contig4-3067_0012|Contig4-3067_0013|orf6.7695|CA5000|CaO19.5247|CaO19.12712|IPF2023	ORF|Uncharacterized	Ca21chr1_C_albicans_SC5314	2657486	2656206	C	CAL0003560	Protein of unknown function
3.38854	orf19.5246		orf19.12711|IPF21954.1|IPF2022.1|Contig4-3067_0014|orf6.7696|CA5001|IPF2022|CaO19.12711|CaO19.5246	ORF|Uncharacterized	Ca21chr1_C_albicans_SC5314	2658916	2657750	C	CAL0003559	Protein of unknown function; Hap43-repressed gene
3.38854	orf19.5245	BUL4	orf19.12710|IPF21933.1|IPF2021.1|Contig4-3067_0016|Contig4-3067_0017|orf6.7697|CA5002|IPF2021|CaO19.12710|CaO19.5245	ORF|Uncharacterized	Ca21chr1_C_albicans_SC5314	2659343	2661511	W	CAL0003558	Protein with a predicted BUL1 N-terminal and C-terminal domains; Bul1 binds the ubiquitin ligase Rsp5 in S. cerevisiae; Hap43-repressed gene; rat catheter biofilm induced
3.38854	orf19.5244	MCD4	orf19.12709|IPF21997.1|IPF2019.2|Contig4-3067_0018|orf6.7698|CA5003|CaO19.5244|CaO19.12709	ORF|Uncharacterized	Ca21chr1_C_albicans_SC5314	2661825	2664740	W	CAL0003557	Protein of major facilitator superfamily; has phosphodiesterase/nucleotide pyrophosphatase domain; similar to S. cerevisiae Mcd4p, which acts in GPI anchor biosynthesis; possibly an essential gene, disruptants not obtained by UAU1 method
3.38854	orf19.5243	TRP3	orf19.12708|IPF21941.1|IPF2018.2|Contig4-3067_0019|orf6.7699|CA5004|CaO19.12708|CaO19.5243	ORF|Uncharacterized	Ca21chr1_C_albicans_SC5314	2664966	2666528	W	CAL0003556	Putative bifunctional enzyme with predicted indole-3-glycerol-phosphate synthase and anthranilate synthase activities; regulated by Gcn2p and Gcn4p
3.38854	orf19.5242	CDC6	orf19.12707|IPF2017.3|IPF28100.1|Contig4-3067_0020|orf6.769|orf6.7700|CA6297|CDC62.3f|CA0178|IPF2017.2	ORF|Uncharacterized	Ca21chr1_C_albicans_SC5314	2667057	2668502	W	CAL0003555	Putative ATP-binding protein with a predicted role in DNA replication; member of conserved Mcm1p regulon; periodic mRNA expression, peak at cell-cycle M/G1 phase
3.38854	orf19.5241	SNT1	orf19.12706|IPF12584|IPF2015.3|IPF12584.2|Contig4-3067_0022|orf6.768|orf6.7701|CA5006|CaO19.5241	ORF|Verified	Ca21chr1_C_albicans_SC5314	2669672	2672677	W	CAL0003554	Ortholog of S. cerevisiae Snt1; an NAD-independent histone deacetylase; heterozygous transposon mutation affects filamentous growth; null mutants are viable
3.38854	orf19.5239		orf19.12703|IPF21946.1|IPF12579.2|Contig4-3067_0023|orf6.7703|CA5007|CaO19.12703|IPF12579|CaO19.5239	ORF|Uncharacterized	Ca21chr1_C_albicans_SC5314	2674291	2672876	C	CAL0003544	Predicted alanine-tRNA ligase; oxidative stress-induced via Cap1
3.38854	orf19.5238		CaO19.5238|CaO19.12702|orf19.12702|IPF21935.1|IPF12577.2|Contig4-3067_0025|orf6.7704|CA5008|IPF12577	ORF|Uncharacterized	Ca21chr1_C_albicans_SC5314	2676383	2674566	C	CAL0003543	Protein of unknown function
3.38854	orf19.5237	VPH2	orf19.12701|IPF21964.1|IPF13946.2|Contig4-3067_0029|orf6.7705|CA5009|CaO19.12701|CaO19.5237	ORF|Uncharacterized	Ca21chr1_C_albicans_SC5314	2677581	2678222	W	CAL0003542	Protein of unknown function
3.38854	orf19.5236		orf19.12700|IPF21963.1|IPF13944.2|Contig4-3067_0031|orf6.7706|CA5011|CaO19.5236|SRT1|IPF21921.1|IPF13945.2|Contig4-3067_0030|CA5010|orf19.5236.1|CaO19.12700|IPF13944	ORF|Uncharacterized	Ca21chr1_C_albicans_SC5314	2678377	2679386	W	CAL0003541	Protein of unknown function
3.38854	orf19.5235		CaO19.12699|orf19.12699|IPF13943|IPF21961.1|IPF13943.2|Contig4-3067_0032|orf6.7707|CA5012|CaO19.5235	ORF|Uncharacterized	Ca21chr1_C_albicans_SC5314	2680237	2679539	C	CAL0003540	Putative mitochondrial ribosomal protein of the large subunit; Hap43-induced; mutants are viable; protein level decreases in stationary phase
3.38854	orf19.5234	RBD1	orf19.12698|IPF11263.3|IPF13941.2|Contig4-3067_0034|orf6.2435|orf6.7708|CA5013|IPF13941|CaO19.5234	ORF|Verified	Ca21chr1_C_albicans_SC5314	2682643	2680634	C	CAL0003539	Rhomboid-like protein; similar to putative intramembrane serine proteases; role in filamentous growth; Gcn4-regulated; caspofungin repressed; Spider biofilm induced
3.38854	orf19.5233		IPF21990.1|IPF28106.1|orf6.7709|CaO19.5233	ORF|Dubious	Ca21chr1_C_albicans_SC5314	2683788	2684135	W	CAL0003538	Protein of unknown function
3.38854	orf19.5232	CSI2	orf19.12697|IPF11270.2|IPF28101.1|Contig4-2357_0002|orf6.2436|orf6.7710|CA1106|CaO19.5232|BRX1|IPF11270	ORF|Verified	Ca21chr1_C_albicans_SC5314	2686695	2685817	C	CAL0003537	Putative 66S pre-ribosomal particle component; Hap43-induced; essential for growth; transposon mutation affects filamentous growth; Spider biofilm induced
3.38854	orf19.5231.2	ATP19	IPF11271.2|IPF28096.1|CA1107|IPF11271	ORF|Verified	Ca21chr1_C_albicans_SC5314	2687617	2687414	C	CAF0007037	Subunit k of the mitochondrial F1F0 ATP synthase; a large enzyme complex required for ATP synthesis; Spider biofilm repressed
3.38854	orf19.5231		orf19.12696|IPF11273.2|IPF18148.2|Contig4-2357_0007|orf6.2437|orf6.7711|CA1108|IPF11273|CaO19.5231	ORF|Uncharacterized	Ca21chr1_C_albicans_SC5314	2687973	2689208	W	CAL0003536	Protein of unknown function; flow model biofilm induced
3.38854	orf19.5230	MRPS9	orf19.12695|IPF21956.1|IPF11274.2|Contig4-2357_0008|orf6.2438|CA1109|CaO19.5230|CaO19.12695	ORF|Verified	Ca21chr1_C_albicans_SC5314	2690384	2689374	C	CAL0003535	Mitochondrial ribosomal protein S9; has N-terminal mitochondrial targeting signal and an S9 consensus motif; overexpression in S. cerevisiae causes respiratory defect that is reversible upon cessation of C. albicans gene expression
3.38854	orf19.5229		orf19.12694|IPF21994.1|IPF10406.2|Contig4-1973_0007|Contig4-2357_0011|orf6.2439|CA1110|CaO19.12694|DIS3|CaO19.5229	ORF|Uncharacterized	Ca21chr1_C_albicans_SC5314	2690877	2693891	W	CAL0003527	Protein of unknown function
3.38854	orf19.5228	RIB3	orf19.12693|orf6.2440|IPF10407.2|IPF18577.2|Contig4-1973_0005|orf6.3689|CA1111|CaO19.5228|RIB3.5f	ORF|Verified	Ca21chr1_C_albicans_SC5314	2694636	2694013	C	CAL0003526	3,4-Dihydroxy-2-butanone 4-phosphate synthase; homodimeric enzyme of riboflavin biosynthesis; converts ribulose 5-phosphate to L-3,4-dihydroxy-2-butanone 4-phosphate; transcription regulated on yeast-hyphal switch, macrophage interaction
3.38854	orf19.5227		orf19.12692|IPF18759.2|IPF10410.1|Contig4-1973_0002|orf6.2441|orf6.3688|CA1974|CaO19.5227|IPF10410	ORF|Uncharacterized	Ca21chr1_C_albicans_SC5314	2695968	2696465	W	CAL0003525	Chaperone component; involved in assembly of alpha subunits into the 20S proteasome; flow model biofilm induced
3.38854	orf19.5226	WRS1	orf19.12691|IPF18578.2|IPF10411.2|Contig4-2921_0012|orf6.3687|CA1973|CaO19.12691|CaO19.5226	ORF|Uncharacterized	Ca21chr1_C_albicans_SC5314	2697872	2696598	C	CAL0003524	Putative tRNA-Trp synthetase; genes encoding ribosomal subunits, translation factors, tRNA synthetases are downregulated upon phagocytosis by murine macrophages
3.38854	orf19.5225.2	RPL27A	IPF19343.2|IPF10412.2|CA1972	ORF|Verified	Ca21chr1_C_albicans_SC5314	2699181	2698355	C	CAF0007036	Ribosomal protein L27; Spider biofilm repressed
3.38854	orf19.5225		IPF10414.1|Contig4-2423_0001|orf6.3686|CaO19.5225	ORF|Uncharacterized	Ca21chr1_C_albicans_SC5314	2700109	2699732	C	CAL0003523	Protein of unknown function
3.38854	orf19.5224	PKH2	orf19.12690|IPF17210.3|IPF10418.1|Contig4-2423_0002|orf6.320|orf6.3685|CA1971|CaO19.5224|PKH1	ORF|Uncharacterized	Ca21chr1_C_albicans_SC5314	2703193	2700359	C	CAL0003522	Putative serine/threonine protein kinase; predicted role in sphingolipid-mediated signaling pathway that controls endocytosis; mRNA binds She3 and is localized to hyphal tips
3.38854	orf19.5223		IPF10862.3|IPF28108.1|Contig4-2423_0005|orf6.3684|CaO19.5223	ORF|Dubious	Ca21chr1_C_albicans_SC5314	2703785	2703387	C	CAL0003521	Protein of unknown function
3.38854	orf19.5221		orf19.12688|IPF19391.2|IPF10863.2|orf6.3682|orf6.210|CA1969|orf6.3683|orf19.5222|CA1970|IPF18579.3f	ORF|Uncharacterized	Ca21chr1_C_albicans_SC5314	2704703	2707654	W	CAL0003519	Protein of unknown function
3.38854	orf19.5220		orf19.12687|IPF21958.1|IPF10864.2|Contig4-2993_0009|orf6.3681|CA1968|CaO19.5220|REX4|IPF10864|CaO19.12687	ORF|Uncharacterized	Ca21chr1_C_albicans_SC5314	2707934	2708791	W	CAL0003518	Putative RNA exonuclease; induced in a ssr1 null mutant
3.38854	orf19.5219	IRA2	orf19.12686|IPF21959.1|IPF10866.2|orf6.3680|CA1967|CaO19.5219|IPF10866	ORF|Uncharacterized	Ca21chr1_C_albicans_SC5314	2717074	2709143	C	CAL0003508	GTPase-activating protein; negatively regulates RAS by converting it from the GTP- to the GDP-bound inactive form; Spider biofilm induced; flow model biofilm repressed
3.38854	orf19.69.2		IPF27195.1|IPF29971.1|Contig4-1654_0004|orf6.6543	ORF|Dubious	Ca21chr1_C_albicans_SC5314	2719038	2718745	C	CAF0006888	Dubious open reading frame
3.38854	orf19.69		orf19.7723|IPF27193.1|IPF17131.2|orf6.1692|CA0644|CaO19.7723|IPF17131|CaO19.69	ORF|Uncharacterized	Ca21chr1_C_albicans_SC5314	2720131	2720868	W	CAL0000634	Protein of unknown function; induced by Mnl1 under weak acid stress
3.38854	orf19.68.2		IPF27197.1|IPF17130.1	ORF|Uncharacterized	Ca21chr1_C_albicans_SC5314	2721027	2721529	W	CAF0006887	Protein of unknown function
3.38854	orf19.3767	PEP1	orf19.11251|IPF23513.1|IPF15204.2|Contig4-3056_0041|orf6.3952|CA2171|CaO19.3767|PEP1.3eoc|PEP1.3|CaO19.11251	ORF|Uncharacterized	Ca21chr1_C_albicans_SC5314	2723345	2727364	W	CAL0001246	Type I transmembrane sorting receptor for multiple vacuolar hydrolases; cycles between late-Golgi and prevacuolar endosome-like compartments; rat catheter biofilm repressed
3.38854	tW(CCA)1	tW(CCA)1	tW(CCA)1.2	tRNA|Uncharacterized	Ca21chr1_C_albicans_SC5314	2727733	2727637	C	CAF0007254	tRNA-Trp, predicted by tRNAscan-SE; CCA anticodon
3.38854	orf19.3765	RAX2	CaO19.3765|orf19.11249|IPF23515.1|IPF15377.2|Contig4-2657_0017|orf6.3954|CA2172|CaO19.11249|IPF15377	ORF|Verified	Ca21chr1_C_albicans_SC5314	2729519	2733700	W	CAL0001245	Plasma membrane protein involved in establishment of bud sites and linear direction of hyphal growth; filament induced, repressed by Rim101, Tup1; Hap43-induced; Spider biofilm induced
3.38854	orf19.3764	GSG1	orf19.11248|IPF23501.1|IPF18527.1|orf6.3955|CA2173|CaO19.11248|CaO19.3764|IPF18527	ORF|Uncharacterized	Ca21chr1_C_albicans_SC5314	2734270	2736549	W	CAL0001244	Putative subunit of the TRAPP complex; involved in targeting of ER-to-Golgi transport vesicles; flow model biofilm induced
3.38854	orf19.3763		orf19.11247|IPF23505.1|IPF20096.1|Contig4-2804_0018|orf6.3956|CA2174|IPF20096|CaO19.11247|CaO19.3763	ORF|Uncharacterized	Ca21chr1_C_albicans_SC5314	2738052	2736673	C	CAL0001243	Protein of unknown function
3.38854	orf19.3762		orf19.11246|IPF23511.1|IPF8892.2|Contig4-2804_0015|orf6.3957|CA2175|CaO19.11246|CaO19.3762|IPF8892	ORF|Uncharacterized	Ca21chr1_C_albicans_SC5314	2738399	2738935	W	CAL0001242	Protein of unknown function
3.38854	orf19.3761	CDC54	orf19.11245|IPF8893.2|IPF18798.2|Contig4-2804_0013|orf6.2267|orf6.3958|CA2176|CaO19.3761|MCM4	ORF|Uncharacterized	Ca21chr1_C_albicans_SC5314	2741772	2739034	C	CAL0001241	Putative pre-replication complex helicase subunit; transcript regulated by Nrg1 and Mig1; periodic mRNA expression, peak at cell-cycle M/G1 phase; Hap43-induced
3.38854	orf19.3760	DLH1	orf19.11244|IPF18526.1|IPF23502.1|IPF23509.1|IPF28648.1|IPF8896.2|IPF8895.2|Contig4-2804_0012|orf6.2266|orf6.3959|CA1007|DLH1.3f	ORF|Verified	Ca21chr1_C_albicans_SC5314	2743158	2742044	C	CAL0001240	Functional homolog of S. cerevisiae Dmc1; a meiosis-specific protein required for repair of double-strand breaks and pairing between homologous chromosomes
3.38854	orf19.3759		CaO19.11243|orf19.11243|IPF23508.1|IPF8898.2|Contig4-2804_0009|orf6.2265|CA1005|LPG7|CaO19.3759	ORF|Uncharacterized	Ca21chr1_C_albicans_SC5314	2744638	2743298	C	CAL0001223	Putative elongator complex subunit; for modification of wobble nucleosides in tRNA; Spider biofilm induced
3.38854	orf19.3758		orf19.11242|IPF23507.1|IPF8901.2|Contig4-2804_0004|Contig4-2804_0006|orf6.2264|CA1004|IPF8901|CaO19.11242|CaO19.3758	ORF|Uncharacterized	Ca21chr1_C_albicans_SC5314	2745011	2746438	W	CAL0001221	Protein of unknown function
3.38854	orf19.3757	ATP20	orf19.11241|IPF23516.1|IPF8902.2|Contig4-2804_0001|orf6.2263|CA1003|CaO19.3757|CaO19.11241	ORF|Verified	Ca21chr1_C_albicans_SC5314	2746930	2747274	W	CAL0001219	Putative mitochondrial ATP synthase; shows colony morphology-related gene regulation by Ssn6p; flucytosine induced; caspofungin repressed; macrophage/pseudohyphal-induced
3.38854	orf19.3756	CHR1	CaO19.3756|orf19.11240|IPF23503.1|IPF8903.2|Contig4-2804_0019|orf6.2262|CA1002|CaO19.11240|ROK1.3f|ROK1.3	ORF|Uncharacterized	Ca21chr1_C_albicans_SC5314	2749675	2747753	C	CAL0001218	Predicted DEAD-box ATP-dependent RNA helicase; functional homolog of S. cerevisiae Rok1; Hap43-induced; Spider biofilm induced
3.38854	orf19.3755		orf19.11239|IPF23510.1|IPF18800.1|orf6.2261|orf19.13720|orf19.6363|orf6.5792|CA3515|Contig4-2678_0018|IPF11656.2|IPF20807.1|CaO19.3755|MRPL152|CaO19.11239	ORF|Uncharacterized	Ca21chr1_C_albicans_SC5314	2749794	2750456	W	CAL0001217	Protein of unknown function
3.38854	orf19.6362	SPA2	orf19.13719|orf6.5791|IPF20811.1|IPF11245.2|Contig4-2678_0013|CA3514|IPF11245|CaO19.6362|CaO19.13719	ORF|Verified	Ca21chr1_C_albicans_SC5314	2752581	2756981	W	CAL0001359	Protein involved in cell polarity, Spitzenkorper formation; required for mouse virulence; localizes to hyphal tip; cell-cycle regulated localization in yeast-form cells; functional domains conserved with S. cerevisiae ; Hap43p-induced gene
3.38854	orf19.6360		orf19.13717|IPF20805.1|IPF11246.2|Contig4-2678_0010|orf6.5789|CA3513|CaO19.13717|CWC15|CaO19.6360|IPF11246	ORF|Uncharacterized	Ca21chr1_C_albicans_SC5314	2757810	2757136	C	CAL0001356	Protein involved in pre-mRNA splicing; Spider biofilm induced
3.38854	orf19.6359		orf19.13716|IPF20812.1|IPF11247.2|Contig4-2678_0008|orf6.5788|CA3512|CaO19.6359|CaO19.13716|SOM1|IPF11247	ORF|Uncharacterized	Ca21chr1_C_albicans_SC5314	2758245	2758646	W	CAL0001349	Protein of unknown function
3.38854	orf19.6358		orf19.13715|IPF20810.1|IPF11248.2|Contig4-2678_0007|orf6.5787|CA3511|CaO19.6358|MMS2|CaO19.13715	ORF|Uncharacterized	Ca21chr1_C_albicans_SC5314	2759290	2758794	C	CAL0001347	Protein of unknown function
3.38854	orf19.6357		orf19.13714|IPF20796.1|IPF11251.2|Contig4-2678_0004|Contig4-2678_0005|orf6.5786|CA3510|MAD1	ORF|Uncharacterized	Ca21chr1_C_albicans_SC5314	2759755	2761845	W	CAL0001345	Protein of unknown function
3.38854	orf19.6356		CaO19.6356|PRP6|orf19.13713|IPF20795.1|IPF19783.1|Contig4-2678_0002|orf6.5785|CA3509|CaO19.13713	ORF|Uncharacterized	Ca21chr1_C_albicans_SC5314	2764614	2761879	C	CAL0001343	Protein of unknown function
3.38854	orf19.6355		orf19.13712|IPF20800.1|IPF11376.2|Contig4-2117_0001|orf6.5784|CA3508|CaO19.13712|RSA2|RRB1|CaO19.6355	ORF|Uncharacterized	Ca21chr1_C_albicans_SC5314	2764811	2766364	W	CAL0001341	Protein of unknown function
3.38854	orf19.6354		CaO19.6354|orf19.13711|IPF20808.1|IPF11375.2|Contig4-2117_0002|orf6.5783|CA3507|IPF11375|CaO19.13711	ORF|Uncharacterized	Ca21chr1_C_albicans_SC5314	2767100	2766450	C	CAL0001339	Protein of unknown function
3.38854	orf19.6353		orf19.13710|IPF20797.1|IPF11374.2|orf6.5782|CA3506|IFA5|LPF40|CaO19.6353|CaO19.13710	ORF|Uncharacterized	Ca21chr1_C_albicans_SC5314	2767835	2769913	W	CAL0001337	Protein of unknown function
3.38854	orf19.6351		orf19.13708|IPF19114.2|IPF11372.2|Contig4-2669_0002|orf6.5780|orf6.880|CA3505|CaO19.6351|IPF11372	ORF|Uncharacterized	Ca21chr1_C_albicans_SC5314	2771901	2770498	C	CAL0001336	Protein of unknown function
3.38854	orf19.6350		orf19.13707|IPF15889.1|IPF11369.2|Contig4-2300_0002|orf6.5779|orf6.879|CA3504|CaO19.6350|IPF11369	ORF|Uncharacterized	Ca21chr1_C_albicans_SC5314	2773095	2772553	C	CAL0001335	Protein of unknown function
3.38854	orf19.6349	RVS162	orf19.13706|IPF19115.1|IPF15890.2|Contig4-2300_0006|orf6.5778|orf6.877|orf6.878|CA3503|RVS99|CaO19.6349|IPF15890	ORF|Uncharacterized	Ca21chr1_C_albicans_SC5314	2774814	2775821	W	CAL0001330	Protein containing a BAR domain, which is found in proteins involved in membrane curvature; null mutant does not display the endocytic, hyphal growth, virulence, or cell wall defects exhibited by mutants in related genes RVS161 and RVS167
3.38854	orf19.6348		orf19.13704|IPF14485|IPF19117.2|IPF14485.2|Contig4-2232_0003|Contig4-2232_0005|orf6.5777|orf6.876|CA3502|CaO19.6348	ORF|Uncharacterized	Ca21chr1_C_albicans_SC5314	2776744	2779569	W	CAL0001329	Predicted cysteine proteinase domain; mutants are viable
3.38854	orf19.6347		orf19.13703|IPF20799.1|IPF14486.2|Contig4-2232_0002|orf6.5776|CA3501|CaO19.6347|CDC40|CaO19.13703	ORF|Uncharacterized	Ca21chr1_C_albicans_SC5314	2781210	2779648	C	CAL0001327	Pre-mRNA splicing factor; important for catalytic step II of pre-mRNA splicing; possible role in cell cycle progression; Spider biofilm induced
3.38854	orf19.6346		orf19.13702|IPF20804.1|IPF14487.2|Contig4-2232_0001|orf6.5775|CA3500|CaO19.6346|IPF14487	ORF|Uncharacterized	Ca21chr1_C_albicans_SC5314	2781378	2782343	W	CAL0001325	Putative nuclear export protein; Hap43p-induced gene; decreased transcription is observed in an azole-resistant strain that overexpresses MDR1
3.38854	orf19.6345	RPG1A	orf19.13701|IPF20794.1|IPF15252.2|Contig4-2851_0006|orf6.5774|CA3499|RPG1|CaO19.6345	ORF|Verified	Ca21chr1_C_albicans_SC5314	2782583	2785375	W	CAL0001323	Putative translation initiation factor; mutation confers hypersensitivity to roridin A and verrucarin A; repressed upon phagocytosis by murine macrophage; Spider biofilm repressed
3.38854	orf19.6344	RBK1	orf19.13700|IPF20801.1|IPF15253.2|Contig4-2421_0007|orf6.5773|CA3498|CaO19.6344	ORF|Uncharacterized	Ca21chr1_C_albicans_SC5314	2785714	2786886	W	CAL0001321	Protein of unknown function
3.38854	orf19.6343	FEN1	orf19.13699|IPF20802.1|IPF18329.1|orf6.5772|CA3497|CaO19.6343|FEN11	ORF|Uncharacterized	Ca21chr1_C_albicans_SC5314	2788209	2787196	C	CAL0001319	Putative fatty acid elongase; predicted role in sphingolipid biosynthesis; possibly an essential gene, disruptants not obtained by UAU1 method; Spider and flow model biofilm induced
3.38854	orf19.6342		orf19.13698|IPF20806.1|IPF17064.2|Contig4-1616_0008|orf6.5771|CA3496|CaO19.13698|IPF17064|CaO19.6342	ORF|Uncharacterized	Ca21chr1_C_albicans_SC5314	2789572	2790057	W	CAL0001318	Protein of unknown function
3.38854	orf19.6341		orf19.13697|IPF20803.1|IPF17066.2|Contig4-1616_0004|orf6.5770|CA3495|CaO19.13697|RIB7|CaO19.6341	ORF|Uncharacterized	Ca21chr1_C_albicans_SC5314	2790349	2791263	W	CAL0001317	Protein of unknown function
3.38854	orf19.6340		orf19.13696|IPF20809.1|IPF17067.2|Contig4-1616_0003|orf6.5769|CA3494|RPB5	ORF|Uncharacterized	Ca21chr1_C_albicans_SC5314	2792314	2791366	C	CAL0001316	Protein of unknown function
3.38854	orf19.4913		orf19.12379|IPF22322.1|IPF15649.2|orf6.3292|CA1680|IPF15649|CaO19.4913|CaO19.12379	ORF|Uncharacterized	Ca21chr1_C_albicans_SC5314	2796467	2792838	C	CAL0006227	Protein of unknown function
3.38854	orf19.4914		orf19.12380|IPF22319.1|IPF12676.2|Contig4-2257_0005|orf6.3293|CA1681|IPF12676|CaO19.12380|CaO19.4914	ORF|Uncharacterized	Ca21chr1_C_albicans_SC5314	2797901	2798254	W	CAL0006228	Protein of unknown function
3.38854	orf19.4914.1	BLP1		ORF|Uncharacterized	Ca21chr1_C_albicans_SC5314	2799928	2800161	W	CAL0120801	Protein of unknown function, serum-induced
3.38854	orf19.4916		orf19.12382|IPF22260.1|IPF19926.1|Contig4-2257_0013|Contig4-2257_0014|Contig4-2257_0016|orf6.3295|CA6216|YFW2|CaO19.12382|IPF12669.3f|CaO19.4916	ORF|Uncharacterized	Ca21chr1_C_albicans_SC5314	2802440	2800971	C	CAL0006231	Protein of unknown function; induced by alpha pheromone in SpiderM medium
3.38854	orf19.4917		orf19.12383|IPF22284.1|IPF12669.2|Contig4-1725_0008|orf6.3296|CA6217|CaO19.4917|CaO19.12383|IPF12669.5f	ORF|Uncharacterized	Ca21chr1_C_albicans_SC5314	2803144	2802497	C	CAL0006233	Protein of unknown function
3.38854	orf19.4918		orf19.12384|IPF13890.3|IPF18629.1|Contig4-2364_0002|orf6.3297|orf6.1451|CA1682|TRA98|CaO19.12384|CaO19.4918|Cirt3	ORF|Uncharacterized	Ca21chr1_C_albicans_SC5314	2805337	2803778	C	CAL0006236	Protein of unknown function
3.38854	orf19.4919		orf19.12385|IPF19869.2|IPF18628.1|Contig4-1725_0012|orf6.3298|CA1683|orf6.3299|orf19.12386|orf19.4920|CaO19.4919|CTN4|CaO19.12385|Cirt5|Cirt	ORF|Dubious	Ca21chr1_C_albicans_SC5314	2805665	2806975	W	CAL0006239	Protein of unknown function
3.38854	orf19.4921		orf19.12387|IPF13892.3|IPF6070.2|Contig4-1725_0002|Contig4-1725_0005|orf6.3300|CA1684|IPF6070|CaO19.4921|YFW1|CaO19.12387	ORF|Uncharacterized	Ca21chr1_C_albicans_SC5314	2807971	2810142	W	CAL0006251	Protein of unknown function
3.38854	orf19.4921.1			ORF|Uncharacterized	Ca21chr1_C_albicans_SC5314	2812003	2812167	W	CAL0120803	Protein of unknown function; Spider biofilm repressed
3.38854	orf19.4922		orf19.12388|IPF22281.1|IPF6076.2|Contig4-2999_0018|orf6.5902|CA3594|IPF6076|IPF6076.3|CaO19.4922|CaO19.12388	ORF|Uncharacterized	Ca21chr1_C_albicans_SC5314	2813567	2812558	C	CAL0006252	Protein of unknown function
3.38854	orf19.4923		orf19.12389|IPF22248.1|IPF6079.1|Contig4-2999_0016|orf6.5903|CA3595|CaO19.12389|IPF6079|CaO19.4923	ORF|Uncharacterized	Ca21chr1_C_albicans_SC5314	2815349	2813793	C	CAL0006253	Predicted membrane transporter; sugar porter (SP) family member, major facilitator superfamily; caspofungin induced; Spider biofilm induced
3.38854	orf19.4923.1			ORF|Uncharacterized	Ca21chr1_C_albicans_SC5314	2815686	2815474	C	CAL0120805	Protein of unknown function
3.38854	orf19.4924		orf19.12390|IPF22318.1|IPF6085.2|Contig4-2999_0010|Contig4-2999_0011|orf6.5904|CA3596|CaO19.12390|CaO19.4924|IPF6085	ORF|Uncharacterized	Ca21chr1_C_albicans_SC5314	2815919	2819872	W	CAL0006255	Protein of unknown function; repressed in ssr1 mutant; Spider biofilm induced
3.38854	orf19.4927	BNI1	orf19.12393|IPF22291.1|IPF6091.1|Contig4-2999_0009|orf6.5907|CA3597|CaO19.4927|CaO19.12393	ORF|Verified	Ca21chr1_C_albicans_SC5314	2825216	2820018	C	CAL0006256	Formin; role in cytoskeletal organization, cell polarity; role in systemic virulence in mouse; cell-cycle regulated localization to site of polarized growth, bud neck; localizes to Spitzenkorper of hyphae, minor localization at septum
3.38854	orf19.4928	SEC2	orf19.12394|IPF6094.2|IPF28177.1|Contig4-2999_0005|orf6.5908|CA3598|CaO19.4928	ORF|Verified	Ca21chr1_C_albicans_SC5314	2829597	2827342	C	CAL0006259	Guanyl-nucleotide exchange factor for the small G-protein Sec4; delivery of post-Golgi secretory vesicles to sites of polarized growth; phosphorylation by Cdc28 needed for normal hyphal growth; Hap43-repressed; flow model biofilm induced
3.38854	snR41b			snoRNA|Uncharacterized	Ca21chr1_C_albicans_SC5314	2830894	2830989	W	CAL0139922	C/D box small nucleolar RNA (snoRNA)
3.38854	snR41			snoRNA|Uncharacterized	Ca21chr1_C_albicans_SC5314	2831146	2831249	W	CAL0126290	C/D box small nucleolar RNA (snoRNA)
3.38854	snR70			snoRNA|Uncharacterized	Ca21chr1_C_albicans_SC5314	2831408	2831499	W	CAL0126346	C/D box small nucleolar RNA (snoRNA)
3.38854	orf19.4929		CaO19.4929|orf19.12395|IPF22332.1|IPF19785.1|Contig4-2999_0001|Contig4-2999_0002|orf6.5909|CA3599|IPF19785|CaO19.12395	ORF|Uncharacterized	Ca21chr1_C_albicans_SC5314	2832089	2835613	W	CAL0006262	Protein of unknown function
3.38854	orf19.4930	SPC3	orf19.12396|orf6.5910|IPF22286.1|IPF15621.2|Contig4-2611_0002|CA3600|CaO19.12396|CaO19.4930	ORF|Verified	Ca21chr1_C_albicans_SC5314	2836345	2835767	C	CAL0006274	Essential protein; similar to S. cerevisiae Spc3p, a component of the signal peptidase complex required for signal peptidase activity; predicted integral ER membrane protein; complements spc3 and suppresses sec61 S. cerevisiae mutants
3.38854	orf19.4931		CaO19.12397|orf19.12397|IPF22211.1|IPF15618.2|Contig4-2611_0003|Contig4-2611_0004|orf6.5911|YNL247WA|CA3601|IPF15618|CaO19.4931	ORF|Uncharacterized	Ca21chr1_C_albicans_SC5314	2838889	2836544	C	CAL0006275	Putative tRNA-Cys synthetase; induced by alpha pheromone in SpiderM medium; ribosomal subunits, translation factors, tRNA synthetases are downregulated upon phagocytosis by murine macrophage
3.38854	snR87			snoRNA|Uncharacterized	Ca21chr1_C_albicans_SC5314	2839464	2839361	C	CAL0126304	C/D box small nucleolar RNA (snoRNA)
3.38854	orf19.4931.1	RPL14	IPF22199.1|IPF12937.2|Contig4-2611_0007|CA3602|RPL14B|RPL14B.3	ORF|Verified	Ca21chr1_C_albicans_SC5314	2839943	2840692	W	CAF0007027	Ribosomal protein L14; promoter bound directly by Tbf1p; Hap43p-induced gene
3.38854	orf19.4932		orf19.12398|IPF22213.1|IPF12940.2|Contig4-2611_0010|orf6.5912|CA3603|CaO19.4932|MEF1|CaO19.12398	ORF|Uncharacterized	Ca21chr1_C_albicans_SC5314	2843438	2841153	C	CAL0006276	Protein of unknown function
3.38854	orf19.4933	FAD3	CaO19.12399|ODE2|orf19.12399|IPF22268.1|IPF12942.2|Contig4-2611_0011|orf6.5913|CA3604|IPF12942|CaO19.4933	ORF|Verified	Ca21chr1_C_albicans_SC5314	2845037	2843736	C	CAL0006277	Omega-3 fatty acid desaturase; production of alpha-linolenic acid, a major component of membranes; caspofungin induced; Plc1-regulated; colony morphology-related gene regulation by Ssn6; Spider biofilm induced, flow model biofilm repressed
3.38854	orf19.4934	OP4	orf19.12400|IPF17845.2|IPF15453.1|Contig4-2962_0020|orf6.5914|orf6.6056|CA3713|OPS4|CaO19.4934	ORF|Verified	Ca21chr1_C_albicans_SC5314	2848705	2849916	W	CAL0006278	Ala- Leu- and Ser-rich protein; secreted; N-terminal hydrophobic region; possible glycosylation; opaque-specific transcript; repressed by alpha pheromone in opaque MTLa homozygotes; fluconazole-induced; Spider biofilm induced
3.38854	orf19.4936		orf19.12402|IPF22293.1|IPF7891.2|Contig4-2962_0015|orf6.6054|CA3712|CaO19.12402|IPF7891|CaO19.4936	ORF|Dubious	Ca21chr1_C_albicans_SC5314	2853604	2853999	W	CAL0006281	Dubious open reading frame
3.38854	orf19.4936.1			ORF|Uncharacterized	Ca21chr1_C_albicans_SC5314	2855099	2855314	W	CAL0120807	Putative adhesin-like protein; Spider biofilm induced
3.38854	orf19.4937	CHS3	orf19.12403|IPF22336.1|IPF22321.1|IPF7889.2|IPF7886.2|Contig4-2962_0013|orf6.6053|CA3711|orf19.12404|orf19.4938|orf6.6052|CA3710|CHS3.3f|CHS3.5f	ORF|Verified	Ca21chr1_C_albicans_SC5314	2859992	2856351	C	CAL0006283	Major chitin synthase of yeast and hyphae; synthesizes short-chitin fibrils; Chs4-activated; transcript induced at yeast-hyphal transition; Chs1 and Chs2, but not Chs3, are inhibited by the protoberberine HWY-289; Spider biofilm induced
3.38854	orf19.4939	MON2	orf19.12405|IPF22294.1|IPF7880.2|Contig4-2962_0004|Contig4-2962_0005|Contig4-2962_0008|orf6.6051|CA3709|IPF7880|CaO19.4939|CaO19.12405	ORF|Uncharacterized	Ca21chr1_C_albicans_SC5314	2866254	2861350	C	CAL0006288	Peripheral membrane protein; role in endocytosis and vacuole integrity; flow model and rat catheter biofilm repressed
3.38854	orf19.4940		orf19.12406|IPF22247.1|IPF7876.2|Contig4-2962_0002|orf6.6050|HIP1|CA3708|CaO19.4940|CaO19.12406	ORF|Uncharacterized	Ca21chr1_C_albicans_SC5314	2868423	2866744	C	CAL0006299	Putative histidine permease; fungal-specific (no human or murine homolog); Hap43p-induced gene
3.38854	orf19.4941	TYE7	orf19.12407|IPF22280.1|IPF5663.1|Contig4-2994_0001|orf6.6049|CA3707|CaO19.4941|CaO19.12407	ORF|Verified	Ca21chr1_C_albicans_SC5314	2869829	2869020	C	CAL0006300	bHLH transcription factor; control of glycolysis; required for biofilm formation; hyphally regulated by Cph1, Cyr1; flucytosine, Hog1 induced; amphotericin B, caspofungin repressed; induced in flow model biofilm and planktonic cultures
3.38854	orf19.4942		orf19.12408|IPF22323.1|IPF28213.1|Contig4-2994_0003|orf6.6048|CaO19.12408|CaO19.4942	ORF|Dubious	Ca21chr1_C_albicans_SC5314	2871337	2871705	W	CAL0006301	Protein of unknown function
3.38854	orf19.4943	PSA2	PSA1|CaO19.12409|orf19.12409|IPF22264.1|IPF5668.1|Contig4-2994_0010|orf6.6047|CA3706|CaO19.4943	ORF|Uncharacterized	Ca21chr1_C_albicans_SC5314	2874278	2875654	W	CAL0006302	Mannose-1-phosphate guanyltransferase; Hap43, macrophage-repressed; stationary phase enriched protein; Spider biofilm induced; rat catheter biofilm repressed
3.38854	orf19.4945	MSH6	CaO19.12411|orf19.12411|IPF22327.1|IPF5670.1|Contig4-2994_0011|orf6.6045|CA3705|CaO19.4945	ORF|Uncharacterized	Ca21chr1_C_albicans_SC5314	2879371	2875727	C	CAL0006305	Protein similar to S. cerevisiae Msh6p, which is involved in mismatch repair; repressed under Cdc5p depletion; Hap43p-induced gene
3.38854	orf19.4946		orf19.12412|IPF22282.1|IPF5671.2|Contig4-2994_0014|orf6.6044|CA3704|IPF5671|CaO19.12412|CaO19.4946	ORF|Uncharacterized	Ca21chr1_C_albicans_SC5314	2879648	2880409	W	CAL0006306	Protein of unknown function
3.38854	orf19.4947		CaO19.4947|IPF18761.2|IPF5672.2|Contig4-2994_0015|orf6.6043|CA1104|IPF18761|IPF18761.1	ORF|Verified	Ca21chr1_C_albicans_SC5314	2880732	2881241	W	CAL0006307	Mitochondrial membrane protein of unknown function; Spider biofilm induced
3.38854	orf19.4948	REX3	orf19.12413|IPF5673.2|IPF28194.1|Contig4-2994_0016|orf6.2434|orf6.6042|CA1103|CaO19.4948|IPF5673	ORF|Uncharacterized	Ca21chr1_C_albicans_SC5314	2882679	2881465	C	CAL0006310	Protein of unknown function
3.38854	orf19.4949		IPF28234.1|orf6.6041|CaO19.4949	ORF|Dubious	Ca21chr1_C_albicans_SC5314	2883368	2883066	C	CAL0006313	Protein of unknown function
3.38854	orf19.4950	AKR1	orf19.12414|IPF22207.1|IPF5675.1|Contig4-2994_0019|orf6.2433|CA1102|CaO19.4950|CaO19.12414	ORF|Uncharacterized	Ca21chr1_C_albicans_SC5314	2886263	2883822	C	CAL0006326	Ankyrin-repeat protein; induced by fluphenazine
3.38854	koppa-1a		koppa	long_terminal_repeat	Ca21chr1_C_albicans_SC5314	2887401	2887194	C	CAL0121139	Long terminal repeat (LTR); about 208 bp long, 10 copies per genome
3.38854	orf19.4951		orf19.12415|IPF5678.1|IPF28195.1|Contig4-2994_0024|orf6.2432|CA1101|IPF5678|CaO19.4951	ORF|Uncharacterized	Ca21chr1_C_albicans_SC5314	2888158	2889426	W	CAL0006327	Protein of unknown function; Spider biofilm induced
3.38854	orf19.4952		orf19.12417|IPF5681.2|IPF19696.1|Contig4-1718_0002|orf6.1485|orf6.2430|CA1100|CaO19.4952|IPF5681	ORF|Uncharacterized	Ca21chr1_C_albicans_SC5314	2891695	2892633	W	CAL0006328	Protein of unknown function; flow model biofilm induced; Spider biofilm induced
3.38854	orf19.4952.1		IPF22326.1|IPF13976.2|Contig4-2314_0003	ORF|Uncharacterized	Ca21chr1_C_albicans_SC5314	2893446	2894008	W	CAF0007028	Protein of unknown function
3.38854	orf19.4953		orf19.12418|IPF19466.2|IPF13975.2|Contig4-2314_0004|orf6.1486|orf6.44|CA0511|CaO19.4953|IPF13975	ORF|Uncharacterized	Ca21chr1_C_albicans_SC5314	2894367	2895263	W	CAL0006329	Putative ATPase; predicted role in ER-associated protein catabolism; induced during chlamydospore formation in both C. albicans and C. dubliniensis; rat catheter biofilm repressed
3.38854	orf19.4954		orf19.12419|IPF19467.1|IPF13974.2|Contig4-2314_0005|orf6.1487|orf6.43|CA0512|CaO19.4954|PPA1|VMA16	ORF|Uncharacterized	Ca21chr1_C_albicans_SC5314	2896155	2895565	C	CAL0006331	Protein of unknown function
3.38854	orf19.4955		orf19.12420|IPF22262.1|IPF13972.2|Contig4-3096_0020|orf6.1488|CA0513|CaO19.4955|SPS2|IPF13972	ORF|Uncharacterized	Ca21chr1_C_albicans_SC5314	2896806	2898392	W	CAL0006333	Protein of unknown function
3.38854	orf19.4956	RPN1	orf19.12421|IPF9623.2|IPF19458.2|Contig4-1464_0001|Contig4-1464_0002|Contig4-2724_0012|orf6.2660|orf6.52|CA1252|CaO19.4956	ORF|Uncharacterized	Ca21chr1_C_albicans_SC5314	2901442	2898458	C	CAL0006334	Putative 19S regulatory particle of the 26S proteasome; regulated by Gcn2p and Gcn4p
3.38854	orf19.4958	ECM25	orf19.12423|IPF9624.2|IPF19459.2|Contig4-2724_0008|orf6.2658|CA6293|IPF9624.3f	ORF|Verified	Ca21chr1_C_albicans_SC5314	2902728	2904596	W	CAL0006338	Non-essential protein involved in cell morphogenesis
3.38854	orf19.4959		orf19.12424|IPF9626.1|IPF28186.1|Contig4-2724_0007|orf6.2657|CA1250|IPF9626|CaO19.4959	ORF|Uncharacterized	Ca21chr1_C_albicans_SC5314	2906720	2904999	C	CAL0006339	Protein of unknown function; Spider biofilm repressed
3.38854	orf19.4960		orf19.12425|IPF22274.1|IPF9628.2|Contig4-2724_0004|orf6.2656|CA1249|CaO19.12425|SPE4|CaO19.4960	ORF|Uncharacterized	Ca21chr1_C_albicans_SC5314	2908446	2907412	C	CAL0006358	Protein of unknown function
3.38854	tara-1a		tara	long_terminal_repeat	Ca21chr1_C_albicans_SC5314	2910785	2911069	W	CAL0121140	Long terminal repeat (LTR); about 285 bp long, 9 copies per genome
3.38854	orf19.4961	STP2	orf19.12426|IPF22239.1|IPF15844.2|Contig4-1523_0002|orf6.2844|CA1372|CaO19.4961|IPF15844|CaO19.12426	ORF|Verified	Ca21chr1_C_albicans_SC5314	2911732	2913486	W	CAL0006359	Amino-acid-regulated transcription factor; activates transcription of amino acid permease genes; activated by amino-acid-induced proteolytic processing (Ssy1, Csh3 dependent); required for alkalinization of medium; Spider biofilm induced
3.38854	orf19.4962	RMP1	orf19.12427|IPF22269.1|IPF19731.1|Contig4-1523_0004|Contig4-2827_0019|orf6.2843|CA1371|IPF19731|CaO19.4962|CaO19.12427	ORF|Uncharacterized	Ca21chr1_C_albicans_SC5314	2914912	2913785	C	CAL0006360	Ortholog of Rmp1; subunit of RNase MRP subunit that processes pre-rRNA and has a role in cell cycle-regulated degradation of daughter cell-specific mRNAs; rat catheter and Spider biofilm induced
3.38854	orf19.4963		orf19.12428|IPF22271.1|IPF15966.2|Contig4-1682_0003|orf6.2842|CA1370|CaO19.12428|CaO19.4963|TCI1	ORF|Uncharacterized	Ca21chr1_C_albicans_SC5314	2915143	2916339	W	CAL0006361	Protein of unknown function
3.38854	orf19.4964		orf19.12429|IPF22279.1|IPF15968.2|Contig4-1682_0001|orf6.2841|CA1369|CaO19.12429|IPF15968|CaO19.4964	ORF|Uncharacterized	Ca21chr1_C_albicans_SC5314	2916611	2917456	W	CAL0006363	Protein of unknown function
3.38854	orf19.4965		orf19.12430|IPF22223.1|IPF15969.2|orf6.2840|CA1368|CaO19.4965|IPF15969|CaO19.12430	ORF|Uncharacterized	Ca21chr1_C_albicans_SC5314	2917715	2919805	W	CAL0006365	Protein of unknown function; rat catheter biofilm induced
3.38854	orf19.4966	AGC1	orf19.12431|IPF16755|IPF22217.1|IPF16755.2|Contig4-2421_0001|orf6.2839|YPR021C|CA1367|CaO19.4966|CaO19.12431	ORF|Verified	Ca21chr1_C_albicans_SC5314	2922382	2920187	C	CAL0006367	Putative mitochondrial carrier protein; transcript is alkaline upregulated rat catheter biofilm induced
3.38854	orf19.4967	COX19	orf19.12432|IPF13215.1|IPF17679.1|Contig4-2421_0006|orf6.1897|orf6.2838|CA0768|CaO19.4967	ORF|Uncharacterized	Ca21chr1_C_albicans_SC5314	2925549	2926017	W	CAL0006369	Putative cytochrome c oxidase assembly protein; Plc1-regulated; rat catheter biofilm induced
3.38854	orf19.4969	KEM1	orf19.12434|XRN1|IPF13214.2|IPF28204.1|Contig4-2907_0019|orf6.2836|orf6.1895|CA0767|KEM1.3|CaO19.4969	ORF|Verified	Ca21chr1_C_albicans_SC5314	2930787	2926204	C	CAL0006374	5'->3' exoribonuclease of cytoplasmic stress granules; role in filamentous growth; complements slow growth/mating of S. cerevisiae kem1 mutant; required for SD or Spider medium biofilm formation
3.38854	orf19.4970		orf19.12435|IPF15335.2|IPF28185.1|Contig4-2387_0004|orf6.180|orf6.1894|CA0766|CaO19.4970|IPF15335	ORF|Uncharacterized	Ca21chr1_C_albicans_SC5314	2933917	2932190	C	CAL0006394	Protein of unknown function; Spider biofilm induced
3.38854	orf19.4972		orf19.12437|IPF7964.2|IPF15920.1|Contig4-2387_0006|orf6.1556|orf6.1893|orf6.3141|CA0556|CaO19.4972|IPF15920	ORF|Uncharacterized	Ca21chr1_C_albicans_SC5314	2937571	2935625	C	CAL0006395	Putative transcription factor with zinc finger DNA-binding motif
3.38854	orf19.4975	HYR1	orf19.12440|Contig4-2860_0006|IPF19734.1|IPF19516.2|orf6.3143|orf6.857|CA1576|GPX1|CA0557|HYR1.53|IPF7957.2|CaO19.4975	ORF|Verified	Ca21chr1_C_albicans_SC5314	2944794	2947553	W	CAL0006398	GPI-anchored hyphal cell wall protein; macrophage-induced; repressed by neutrophils; resistance to killing by neutrophils, azoles; regulated by Rfg1, Efg1, Nrg1, Tup1, Cyr1, Bcr1, Hap43; Spider and flow model biofilm induced
3.38854	orf19.4976		orf19.12443|IPF22315.1|IPF28200.1|orf6.3146|orf6.858|CaO19.4976	ORF|Dubious	Ca21chr1_C_albicans_SC5314	2951250	2951606	W	CAL0006400	Protein of unknown function
3.38854	orf19.4979	KNS1	orf19.12446|IPF11410.2|IPF28178.1|Contig4-2706_0013|orf6.3149|CA1577|CaO19.4979|CaO19.12446	ORF|Uncharacterized	Ca21chr1_C_albicans_SC5314	2952225	2954225	W	CAL0006406	Protein kinase involved in negative regulation of PolIII transcription; effector kinase of the TOR signaling pathway, phosphorylates Rpc53p to regulate ribosome and tRNA biosynthesis; Spider and flow model biofilm induced
3.38854	orf19.4980	HSP70	orf19.12447|IPF22233.1|IPF11819.2|Contig4-2251_0001|CA1230|HS71|SSA1|SSA4|orf6.2627|CaO19.4980|CaO19.12447	ORF|Verified	Ca21chr1_C_albicans_SC5314	2955762	2957732	W	CAL0000006	Putative hsp70 chaperone; role in entry into host cells; heat-shock, amphotericin B, cadmium, ketoconazole-induced; surface localized in yeast and hyphae; antigenic in host; farnesol-downregulated in biofilm; Spider biofilm induced
3.38854	orf19.4981		orf19.12448|IPF22224.1|IPF11817.2|Contig4-2251_0004|orf6.2628|CA1231|CaO19.4981|IPF11817|CaO19.12448	ORF|Uncharacterized	Ca21chr1_C_albicans_SC5314	2960132	2958018	C	CAL0000007	Protein of unknown function
3.38854	snR3a			snoRNA|Uncharacterized	Ca21chr1_C_albicans_SC5314	2960571	2960461	C	CAL0126306	H/ACA box small nucleolar RNA (snoRNA)
3.38854	orf19.4982		orf19.12449|IPF22252.1|IPF11815.2|Contig4-2494_0015|orf6.2629|CA1232|CaO19.12449|TGL99|IPF11815|CaO19.4982	ORF|Uncharacterized	Ca21chr1_C_albicans_SC5314	2962728	2961100	C	CAL0000008	Protein of unknown function
3.38854	orf19.4983		orf19.12450|IPF1758.2|IPF11814.1|Contig4-2494_0009|orf6.2630|orf6.8026|CA1233|CaO19.4983|IPF11814	ORF|Uncharacterized	Ca21chr1_C_albicans_SC5314	2964210	2963395	C	CAL0000009	Protein of unknown function
3.38854	orf19.4984		orf19.12451|IPF1760.2|IPF22206.1|IPF19907.2|IPF18120.1|Contig4-2494_0006|orf6.2631|orf6.8025|CA5275|IPF1760.3f|CA5276|IPF1759.53f|IPF1759.1	ORF|Uncharacterized	Ca21chr1_C_albicans_SC5314	2964525	2966081	W	CAL0000011	Protein of unknown function
3.38854	orf19.4985	GUP1	orf19.12452|IPF22244.1|IPF1764.2|Contig4-2494_0003|orf6.8024|CA5274|IPF1764|CaO19.4985|CaO19.12452	ORF|Verified	Ca21chr1_C_albicans_SC5314	2966690	2968444	W	CAL0000013	Putative O-acyltransferase with a role in glycerol uptake; functionally complements growth of S. cerevisiae gup1 mutant under salt stress; required for normal ergosterol distribution, hyphal growth, biofilm formation
3.38854	orf19.4987	NUP49	orf19.12454|IPF22266.1|IPF1766.2|Contig4-2494_0001|orf6.8022|CA5273|CaO19.4987|CaO19.12454	ORF|Verified	Ca21chr1_C_albicans_SC5314	2969909	2968560	C	CAL0000016	Nuclear pore protein
3.38854	orf19.4988		orf19.12455|IPF22259.1|IPF1770.1|Contig4-3025_0024|orf6.8021|CA5272|IPF1770|CaO19.4988|CaO19.12455	ORF|Uncharacterized	Ca21chr1_C_albicans_SC5314	2970121	2971638	W	CAL0000017	S. cerevisiae ortholog Sae2 is an endonuclease that processes hairpin DNA structures with the MRX complex, involved in meiotic and mitotic double-strand break repair; upregulated in a cyr1 null mutant
3.38854	orf19.4991	MPT5	orf19.12458|IPF22202.1|IPF1777.1|Contig4-3025_0018|Contig4-3025_0020|orf6.8018|CA5271|CaO19.4991|CaO19.12458|IPF1777	ORF|Uncharacterized	Ca21chr1_C_albicans_SC5314	2976356	2979172	W	CAL0000028	Putative RNA-binding protein; Hap43p-repressed gene; protein induced during the mating process
3.38854	orf19.4993	SEC18	orf19.12460|IPF22276.1|IPF22225.1|IPF22267.1|IPF1784.2|IPF1785.2|IPF1786.2|Contig4-3025_0011|Contig4-3025_0012|Contig4-3025_0013|orf6.8016|CA5270|orf19.12461|orf19.4994|orf6.8015|CA5268|SEC18.5f	ORF|Verified	Ca21chr1_C_albicans_SC5314	2981615	2984005	W	CAL0000029	Functional homolog of S. cerevisiae Sec18p, which acts in protein transport; conserved ATP binding site; not glycosylated
3.38854	orf19.4995		orf19.12462|IPF22270.1|IPF1787.1|Contig4-3025_0010|orf6.8014|CA5267|CaO19.12462|CaO19.4995|IPF1787.5f	ORF|Uncharacterized	Ca21chr1_C_albicans_SC5314	2985121	2986353	W	CAL0000033	Protein of unknown function
3.38854	orf19.4996		orf19.12463|IPF22278.1|IPF1789.1|Contig4-3025_0009|orf6.8013|CA5266|IPF1787.3f|CaO19.4996|CaO19.12463	ORF|Uncharacterized	Ca21chr1_C_albicans_SC5314	2986453	2987349	W	CAL0000035	Protein of unknown function
3.38854	orf19.4997	KIS2	orf19.12464|IPF22214.1|IPF1792.1|Contig4-3025_0006|Contig4-3025_0007|orf6.8012|CA5265|CaO19.4997|IPF1792|CaO19.12464	ORF|Verified	Ca21chr1_C_albicans_SC5314	2990032	2987795	C	CAL0000037	Scaffold protein of Snf1p complex; similar to S. cerevisiae Gal83p and Sip2p; interacts with Snf4p; interaction with Snf1p complex is regulated by carbon source, decreased on ethanol; N-terminal myristoylation; Hog1p-downregulated
3.38854	orf19.4998	ROB1	orf19.12465|IPF22198.1|IPF1798.2|orf6.8011|CA5264|IPF1798|CaO19.4998|CHA4|CaO19.12465	ORF|Verified	Ca21chr1_C_albicans_SC5314	2993348	2996389	W	CAL0000039	Zn(II)2Cys6 transcription factor; required for Spider model biofilm formation; mutant displays abnormal colony morphology and invasive growth; caspofungin repressed; flow model biofilm induced; rat catheter biofilm repressed
3.38854	orf19.5000	CYB2	CaO19.12467|CaO19.5000|orf19.12467|orf6.8009|IPF22249.1|IPF1801.1|Contig4-3061_0027|CA5263|CYB3	ORF|Uncharacterized	Ca21chr1_C_albicans_SC5314	2997207	2998889	W	CAL0001565	Putative cytochrome b2 precursor; induced in high iron; alkaline repressed; colony morphology-related gene regulation by Ssn6; Hap43-repressed; pider biofilm induced
3.38854	orf19.5001	CUP2	orf19.12468|IPF22242.1|IPF1804.1|Contig4-3061_0022|Contig4-3061_0024|orf6.8008|CA5262|CaO19.5001|HAA1|CaO19.12468|IPF1804	ORF|Verified	Ca21chr1_C_albicans_SC5314	2999889	3001664	W	CAL0001566	Putative copper-binding transcription factor; required for normal resistance to copper; activates transcription of metallothionein genes; Hap43-repressed; Spider biofilm induced
3.38854	orf19.5003		orf19.12470|IPF22265.1|IPF1805.2|Contig4-3061_0021|orf6.8006|CA5261|IPF1805|CaO19.12470|CaO19.5003	ORF|Uncharacterized	Ca21chr1_C_albicans_SC5314	3003092	3001746	C	CAL0001567	Protein of unknown function
3.38854	orf19.5004	RAD54	CaO19.5004|orf19.12471|IPF22209.1|IPF1807.1|Contig4-3061_0018|orf6.8005|CA5260|CaO19.12471	ORF|Verified	Ca21chr1_C_albicans_SC5314	3003486	3006032	W	CAL0001568	Putative DNA-dependent ATPase involved in DNA repair; induced under hydroxyurea treatment; plays an essential role during mitotic growth; mutants display aberrant cell and nuclear morphology
3.38854	orf19.5005	OSM2	orf19.12472|IPF22234.1|IPF1808.1|Contig4-3061_0016|orf6.8004|CA5259|CaO19.12472|OSM1|CaO19.5005	ORF|Uncharacterized	Ca21chr1_C_albicans_SC5314	3006473	3008419	W	CAL0001569	Putative mitochondrial fumarate reductase; regulated by Ssn6p, Gcn2p, and Gcn4p; Hog1p-downregulated; stationary phase enriched protein; Hap43p-repressed gene
3.38854	orf19.5006	GCV3	CaO19.12473|CaO19.5006|orf19.12473|IPF22289.1|IPF1809.1|Contig4-3061_0015|orf6.8003|CA5258	ORF|Uncharacterized	Ca21chr1_C_albicans_SC5314	3009024	3008491	C	CAL0001570	Glycine decarboxylase, subunit H; protein level decrease in stationary phase cultures
3.38854	orf19.5006.1		IPF22222.1|Contig4-3061_0014|CA5256|orf19.5006.2|SNC2|CA5257|SNC2.exon2|IPF1811.1	ORF|Uncharacterized	Ca21chr1_C_albicans_SC5314	3010010	3009603	C	CAF0007029	Protein of unknown function
3.38854	orf19.5007	ACT1	orf19.12474|ACT|IPF22272.1|IPF1819.1|Contig4-3061_0012|orf6.8002|CA5255	ORF|Verified	Ca21chr1_C_albicans_SC5314	3011464	3013252	W	CAL0001571	Actin; gene has intron; transcript regulated by growth phase, starvation; at polarized growth site in budding and hyphal cells; required for wild-type Cdc42 localization; unprocessed N terminus; Hap43-induced; Spider biofilm repressed
3.38854	orf19.5008.1	DAD1	IPF22290.1|IPF1820.1|Contig4-3061_0011|CA5254|IPF1820	ORF|Verified	Ca21chr1_C_albicans_SC5314	3013825	3013526	C	CAF0007030	Subunit of the Dam1 (DASH) complex, which acts in chromosome segregation by coupling kinetochores to spindle microtubules
3.38854	orf19.5009		orf19.12476|IPF22235.1|IPF1821.1|Contig4-3061_0010|orf6.8000|CA5253|CaO19.5009|KEL3|CaO19.12476	ORF|Uncharacterized	Ca21chr1_C_albicans_SC5314	3014085	3016001	W	CAL0001573	Protein of unknown function
3.38854	orf19.5010	DIM1	orf19.12477|IPF22277.1|IPF1822.1|Contig4-3061_0009|orf6.7999|CA5252|CaO19.5010|CaO19.12477	ORF|Uncharacterized	Ca21chr1_C_albicans_SC5314	3017083	3016103	C	CAL0001590	Putative 18S rRNA dimethylase; predicted role in rRNA modification and processing; Hap43-induced; likely to be essential for growth based on insertional mutagenesis strategy; F-12/CO2 early biofilm induced
3.38854	orf19.5011	KAR9	orf19.12478|IPF22215.1|IPF1824.1|Contig4-3061_0004|Contig4-3061_0005|Contig4-3061_0006|orf6.7998|CA5251|CaO19.5011|CaO19.12478|IPF1824	ORF|Verified	Ca21chr1_C_albicans_SC5314	3017916	3020192	W	CAL0001591	Ortholog of S. cerevisiae Kar9; role in mitotic spindle positioning; nonessential; localizes to bud tip, bud neck, hyphal tip; wild-type localization requires actin and microtubule cytoskeleton; induced by alpha factor
3.38854	orf19.5012		orf19.12479|IPF22285.1|IPF1826.2|Contig4-3061_0003|orf6.7997|CA5250|CaO19.5012|CaO19.12479|IPF1826	ORF|Uncharacterized	Ca21chr1_C_albicans_SC5314	3020879	3020283	C	CAL0001592	Protein of unknown function
3.38854	orf19.5013	AGM1	orf19.12480|IPF22253.1|IPF1827.2|Contig4-3061_0002|orf6.7996|CA5249|PCM1|CaO19.5013|CaO19.12480	ORF|Uncharacterized	Ca21chr1_C_albicans_SC5314	3021071	3022705	W	CAL0001593	Phosphoacetylglucosamine mutase (N-acetylglucosamine-phosphate mutase); enzyme of UDP-N-acetylglucosamine (UDP-GlcNAc) biosynthesis
3.38854	orf19.5014		orf19.12481|IPF22283.1|IPF1828.1|Contig4-3061_0001|orf6.7995|CA5248|CaO19.12481|IPF1828|CaO19.5014	ORF|Uncharacterized	Ca21chr1_C_albicans_SC5314	3023536	3022829	C	CAL0001594	Protein of unknown function
3.38854	orf19.5015	MYO2	CaO19.5015|orf19.12482|IPF22298.1|IPF13531.2|Contig4-2345_0002|Contig4-2345_0004|orf6.7994|CA5247|CaO19.12482	ORF|Verified	Ca21chr1_C_albicans_SC5314	3026140	3030825	W	CAL0001595	Class V myosin; nonessential; sole class V myosin in C. albicans; required for WT actin cytoskeletal polarity, nuclear organization, migration, hyphal growth; conserved myosin ATPase/tail domains; Hap43-induced; flow model biofilm repressed
3.38854	orf19.5016		orf19.12483|IPF19808|IPF22314.1|IPF19808.1|Contig4-2345_0001|orf6.7993|CA5246|CaO19.12483|CaO19.5016	ORF|Uncharacterized	Ca21chr1_C_albicans_SC5314	3031406	3031041	C	CAL0001596	Protein of unknown function
3.38854	orf19.5017	DUR32	orf19.12484|IPF22231.1|IPF3048.2|Contig4-3075_0002|orf6.7992|CA5245|CaO19.12484|CaO19.5017	ORF|Uncharacterized	Ca21chr1_C_albicans_SC5314	3033599	3031584	C	CAL0001597	Putative urea transporter; possibly an essential gene, disruptants not obtained by UAU1 method
3.38854	orf19.5019		orf19.12486|IPF22226.1|IPF3043.1|Contig4-3075_0004|orf6.7990|CA5244|IPF3043|CaO19.5019|CaO19.12486	ORF|Uncharacterized	Ca21chr1_C_albicans_SC5314	3035261	3037345	W	CAL0001598	Protein of unknown function
3.38854	orf19.5020		orf19.12487|IPF22275.1|IPF3040.1|Contig4-3075_0006|orf6.7989|CA5243|IPF3040|CaO19.5020|CaO19.12487	ORF|Uncharacterized	Ca21chr1_C_albicans_SC5314	3038662	3037640	C	CAL0001614	Protein of unknown function; Hap43-induced; Spider biofilm induced
3.38854	orf19.5021	PDX1	orf19.12488|IPF22263.1|IPF3038.1|Contig4-3075_0007|orf6.7988|CA5242|CaO19.5021|CaO19.12488	ORF|Verified	Ca21chr1_C_albicans_SC5314	3040358	3039105	C	CAL0001615	Pyruvate dehydrogenase complex protein X; essential component of the mitochondrial pyruvate dehydrogenase complex; role in the respiratory pathway; protein present in exponential and stationary growth phase yeast; Spider biofilm repressed
3.38854	orf19.5022		orf19.12489|IPF22229.1|IPF3034.1|Contig4-3075_0009|orf6.7987|CA5241|CaO19.12489|SMF2|SMF3|CaO19.5022	ORF|Uncharacterized	Ca21chr1_C_albicans_SC5314	3041593	3043548	W	CAL0001616	Protein of unknown function
3.38854	orf19.5023	DAL7	orf19.12490|IPF3032|IPF22258.1|IPF3032.1|Contig4-3075_0010|orf6.7986|CA5240|CaO19.5023|CaO19.12490	ORF|Uncharacterized	Ca21chr1_C_albicans_SC5314	3045169	3043640	C	CAL0001617	Putative allantoate permease; mutant is viable
3.38854	orf19.5024	GND1	CaO19.5024|DOR14|CaO19.12491|orf19.12491|IPF22257.1|IPF3028.2|Contig4-3075_0013|orf6.7985|CA5239	ORF|Alternatively spliced|Verified	Ca21chr1_C_albicans_SC5314	3048182	3045995	C	CAL0001618	6-phosphogluconate dehydrogenase; soluble in hyphae; farnesol, macrophage-induced protein; antigenic in mice; dual localization to cytosol and peroxisomes depends on alternative splicing; rat catheter and Spider biofilm repressed
3.38854	orf19.5025	MET3	orf19.12492|orf6.7984|IPF22255.1|IPF3022.1|Contig4-3075_0019|Contig4-3075_0020|CA5238|CaO19.5025|CaO19.12492	ORF|Uncharacterized	Ca21chr1_C_albicans_SC5314	3051624	3053207	W	CAL0001619	ATP sulfurlyase; sulfate assimilation; repressed by Met, Cys, Sfu1, or in fluconazole-resistant isolate; Hog1, caspofungin, white phase-induced; induced on biofilm formation, even in presence of Met and Cys; Spider, F-12/CO2 biofilm induced
3.38854	orf19.5026		orf19.12493|IPF22331.1|IPF3021.1|Contig4-3075_0021|orf6.7983|CA5237|ZMS1|CaO19.5026|CaO19.12493	ORF|Uncharacterized	Ca21chr1_C_albicans_SC5314	3057052	3053519	C	CAL0001620	C2H2 transcription factor; Spider biofilm induced
3.38854	tA(AGC)7	tA(AGC)7	tA(AGC)7.2	tRNA|Uncharacterized	Ca21chr1_C_albicans_SC5314	3061194	3061122	C	CAF0007134	tRNA-Ala, predicted by tRNAscan-SE; AGC anticodon
3.38854	orf19.5027	LCB2	orf19.12494|IPF22245.1|IPF3017.1|Contig4-3075_0027|orf6.7982|CA5236|CaO19.5027|CaO19.12494	ORF|Verified	Ca21chr1_C_albicans_SC5314	3063251	3061542	C	CAL0001621	Putative serine palmitoyltransferase component; mutation confers hypersensitivity to aureobasidin A
3.38854	orf19.5029	MODF	CaO19.12496|CaO19.5029|orf19.12496|IPF22250.1|IPF3015.1|Contig4-3075_0031|orf6.7980|CA5235|IPF3015	ORF|Uncharacterized	Ca21chr1_C_albicans_SC5314	3065571	3063934	C	CAL0001623	Protein of unknown function
3.38854	orf19.5030	DOS2	orf19.12497|IPF18123.2|IPF3014.1|Contig4-3075_0032|orf6.7979|CA5234|CaO19.5030|IPF3014|CaO19.12497	ORF|Uncharacterized	Ca21chr1_C_albicans_SC5314	3066059	3067138	W	CAL0001640	Protein of unknown function; induced during planktonic growth
3.38854	orf19.5031	SSK1	orf19.12498|orf6.7978|IPF22230.1|IPF3012.2|CA5233|CaO19.12498|CaO19.5031	ORF|Verified	Ca21chr1_C_albicans_SC5314	3067600	3069624	W	CAL0001641	Response regulator of two-component system; role in oxidative stress response, cell wall biosynthesis, virulence, hyphal growth on solid media; expressed in hyphae and yeast; peroxisomal targeting sequence (PTS1); Spider biofilm induced
3.38854	orf19.5032	SIM1	orf19.12499|IPF22273.1|IPF10421.1|Contig4-2686_0006|orf6.7977|CA5232|SUN42|CaO19.5032|UTH1|CaO19.12499	ORF|Verified	Ca21chr1_C_albicans_SC5314	3074225	3075343	W	CAL0001642	Adhesin-like protein; involved in cell wall maintenance, redundant with Sun41; possibly secreted; macrophage-repressed; repressed by Rim101, Cyr1, Ras1; Spider biofilm induced
3.38854	orf19.5033		orf19.12500|IPF22292.1|IPF10422.1|Contig4-2686_0005|orf6.7976|CA5231|ATG12|CaO19.12500|IPF10422|CaO19.5033	ORF|Uncharacterized	Ca21chr1_C_albicans_SC5314	3076326	3075832	C	CAL0001643	Protein of unknown function
3.38854	orf19.5034	YBP1	orf19.12501|IPF22219.1|IPF10424.1|Contig4-2686_0004|orf6.7975|CA5230|IPF10424|CaO19.12501|CaO19.5034	ORF|Verified	Ca21chr1_C_albicans_SC5314	3076739	3078670	W	CAL0001644	Protein involved in response to oxidative stress, binds and stabilizes Cap1p transcription factor in response to H2O2; essential for macrophage killing
3.38854	orf19.5035	HPC2	orf19.12502|IPF22251.1|IPF10425.1|Contig4-2686_0002|orf6.7974|CA5229|IPF10425|CaO19.5035|CaO19.12502	ORF|Uncharacterized	Ca21chr1_C_albicans_SC5314	3080366	3078708	C	CAL0001645	Protein of unknown function
3.38854	orf19.7205	DUR7	IPF901.1|Contig4-3075_0002|CA5331|DUR33.5eoc|DUR33|orf6.8105	ORF|Uncharacterized	Ca21chr1_C_albicans_SC5314	3083072	3081048	C	CAL0003739	Putative urea transporter; fungal-specific (no human or murine homolog)
3.38854	orf19.7206	OCA6	IPF900.2|Contig4-3017_0006|orf6.8106|CA5332|IPF900.3f|IPF900.3|CaO19.7206	ORF|Verified	Ca21chr1_C_albicans_SC5314	3083829	3084437	W	CAL0003740	Putative protein phosphatase of the PTP family (tyrosine-specific), similar to S. cerevisiae Oca6p; mutant shows virulence defect
3.38854	orf19.7207	DOA4	IPF899.1|Contig4-3017_0010|orf6.8107|CA5333|CaO19.7207	ORF|Verified	Ca21chr1_C_albicans_SC5314	3086875	3084440	C	CAL0003741	Ortholog of S. cerevisiae Doa4;, a ubiquitin hydrolase involved in recycling ubiquitin from proteasome-bound ubiquitinated intermediates; oxidative stress-induced via Cap1; mutants are viable
3.38854	orf19.7208	CSK1	SMK1|IPF895.1|Contig4-3017_0013|orf6.8108|CA5334	ORF|Verified	Ca21chr1_C_albicans_SC5314	3087751	3088943	W	CAL0003743	Putative mitogen-activated protein (MAP) kinase with an unknown role; null mutant produces wrinkled colonies; similar to S. cerevisiae Smk1p, which is a protein kinase required for sporulation
3.38854	orf19.7209		IPF894.1|Contig4-3017_0014|orf6.8109|CA5335|IPF894|CaO19.7209	ORF|Uncharacterized	Ca21chr1_C_albicans_SC5314	3089336	3089743	W	CAL0003744	Putative Rho GDP dissociation inhibitor; induced by nitric oxide independent of Yhb1p
3.38854	orf19.7210		IPF893.1|Contig4-3017_0016|orf6.8110|CA5336|CaO19.7210|IPF893	ORF|Uncharacterized	Ca21chr1_C_albicans_SC5314	3090053	3091060	W	CAL0003765	Protein of unknown function; Spider biofilm induced
3.38854	orf19.7212		IPF891.1|Contig4-3017_0017|orf6.8112|CA5337|CaO19.7212|APL1	ORF|Verified	Ca21chr1_C_albicans_SC5314	3091220	3093523	W	CAL0003766	Phosphorylated protein; homozygous transposon insertion causes decreased colony wrinkling in filamentous growth-inducing conditions, but does not block hyphal formation in liquid media; Hap43-repressed
3.38854	orf19.7213		IPF889.2|Contig4-3017_0019|Contig4-3017_0020|orf6.8113|CA5338|IPF889|CaO19.7213	ORF|Uncharacterized	Ca21chr1_C_albicans_SC5314	3096896	3093525	C	CAL0003767	Putative ATP-dependent RNA helicase; fungal-specific (no human or murine homolog)
3.38854	orf19.7214		IPF885.1|Contig4-3017_0021|orf6.8114|CA5339|CaO19.7214|IPF885	ORF|Uncharacterized	Ca21chr1_C_albicans_SC5314	3097299	3098807	W	CAL0003768	Glucan 1,3-beta-glucosidase; regulated by Nrg1, Tup1 and possibly Tac1; induced by NO and during cell wall regeneration; stationary phase enriched; possibly essential (UAU1 method); F-12/CO2 early biofilm induced; flow biofilm repressed
3.38854	chi-1a		chi	long_terminal_repeat	Ca21chr1_C_albicans_SC5314	3099035	3099226	W	CAL0121141	Long terminal repeat (LTR) associated with the transposon Tca10; about 192 bp long, 11 copies per genome
3.38854	orf19.7215		IPF883.1|Contig4-3017_0022|orf6.8115|CA5340|IPF883|CaO19.7215	ORF|Uncharacterized	Ca21chr1_C_albicans_SC5314	3099412	3104868	W	CAL0003770	Nucleolar protein; component of the small subunit processome containing the U3 snoRNA; involved in pre-18S rRNA processing; flow model biofilm repressed
3.38854	orf19.7215.3		IPF878.1|Contig4-2519_0001|CA5341|HSP10|HSP10.3	ORF|Uncharacterized	Ca21chr1_C_albicans_SC5314	3105095	3105476	W	CAF0007117	Protein of unknown function
3.38854	orf19.7216	YPT52	IPF877.1|Contig4-2519_0002|orf6.8116|CA5342|YPT521|CaO19.7216	ORF|Verified	Ca21chr1_C_albicans_SC5314	3105892	3106557	W	CAL0003771	Rab-family GTPase involved in vacuolar trafficking, colocolizes with Vps1p and Ypt53p in late endosome
3.38854	orf19.7217	RPL4B	IPF875.1|Contig4-2519_0003|orf6.8117|CA5343|RPL4|CaO19.7217	ORF|Verified	Ca21chr1_C_albicans_SC5314	3107870	3106779	C	CAL0003773	Ribosomal protein 4B; repressed upon phagocytosis by murine macrophage; Spider biofilm repressed
3.38854	orf19.7218	RBE1	IPF872.1|Contig4-2519_0004|orf6.8118|CA5344|PRY2|CaO19.7218	ORF|Verified	Ca21chr1_C_albicans_SC5314	3109061	3108246	C	CAL0003775	Pry family cell wall protein; Rim101, Efg1, Ssn6, alkaline repressed; O-glycosylation; no GPI anchor predicted; ketoconazol induced; regulated by Sef1, Sfu1, Hap4; flow model biofilm induced; rat catheter and Spider biofilm repressed
2.70064	orf19.7219	FTR1	IPF868.1|Contig4-3043_0004|CA5345|orf6.8119|CaO19.7219	ORF|Verified	Ca21chr1_C_albicans_SC5314	3113806	3114951	W	CAL0003776	High-affinity iron permease; required for mouse virulence, low-iron growth; iron, amphotericin B, caspofungin, ciclopirox, Hog1p, Sef1p, Sfu1p, and Hap43p regulated; complements S. cerevisiae ftr1 iron transport; Hap43p-repressed
2.70064	orf19.7221	SET3	IPF867.2|Contig4-3043_0006|Contig4-3043_0007|orf6.8121|CA5346|CaO19.7221|IPF867	ORF|Verified	Ca21chr1_C_albicans_SC5314	3118760	3115551	C	CAL0003800	NAD-dependent histone deacetylase; mutations affect filamentous growth; genetic evidence suggests Set3/Hos2 function as a complex to regulate white-opaque switching, morphogenesis, and virulence; flow model biofilm induced
2.70064	orf19.7222	PAM16	IPF864.1|Contig4-3043_0009|orf6.8122|CA5347|CaO19.7222|IPF864	ORF|Uncharacterized	Ca21chr1_C_albicans_SC5314	3120326	3119961	C	CAL0003801	Putative maltase; regulated by Gcn4; repressed by amino acid starvation (3-AT); rat catheter biofilm induced
2.70064	orf19.7223		IPF863.1|Contig4-3043_0010|orf6.8123|CA5348|CaO19.7223|IPF863	ORF|Uncharacterized	Ca21chr1_C_albicans_SC5314	3121139	3122893	W	CAL0003802	Protein of unknown function
2.70064	orf19.7224		IPF861.1|Contig4-3043_0014|orf6.8124|CA5349|CaO19.7224|IPF861	ORF|Uncharacterized	Ca21chr1_C_albicans_SC5314	3123255	3124931	W	CAL0003803	Protein of unknown function
2.70064	orf19.7225		IPF859.1|Contig4-3043_0016|orf6.8125|CA5350|CaO19.7225|IPF859	ORF|Uncharacterized	Ca21chr1_C_albicans_SC5314	3125467	3127038	W	CAL0003804	Protein of unknown function
2.70064	orf19.7227		IPF857.1|Contig4-3043_0017|orf6.8127|CA5351|IPF857|CaO19.7227|YPI1	ORF|Verified	Ca21chr1_C_albicans_SC5314	3127472	3127098	C	CAL0003807	Protein phosphatase inhibitor; Hap43-repressed; homozygous Tn insertion decreases colony wrinkling but does not block hyphal growth in liquid media; mutation confers hypersensitivity to toxic ergosterol analog; Spider biofilm induced
2.70064	orf19.7228		IPF856.1|Contig4-3043_0018|orf6.8128|CA5352|IPF856|CaO19.7228	ORF|Uncharacterized	Ca21chr1_C_albicans_SC5314	3127809	3128801	W	CAL0003808	Possible Golgi membrane protein; transcript positively regulated by Tbf1; mRNA binds She3
2.70064	orf19.7229	IML2	IPF855.1|Contig4-3043_0019|orf6.8129|CA5353|CaO19.7229	ORF|Uncharacterized	Ca21chr1_C_albicans_SC5314	3131465	3128865	C	CAL0003810	Protein of unknown function; early-stage flow model biofilm induced; Hap43-repressed; Spider biofilm repressed
2.70064	orf19.7231	FTR2	CaO19.7231|orf6.8131|IPF853.1|Contig4-3043_0021|CA5354	ORF|Verified	Ca21chr1_C_albicans_SC5314	3134269	3133121	C	CAL0003834	High-affinity iron permease; probably interacts with ferrous oxidase; regulated by iron level, ciclopirox olamine, amphotericin B, caspofungin; complements S. cerevisiae ftr1 iron transport defect; Hap43-repressed; Spider biofilm induced
Isolate	Chromosome
AMS4105	Chr3
Amplificaiton	ORF ID	Standard Name	Alias	Feature Type	Chromosome	Start Position	Stop Position	Strand	Primary CGD ID	Description
2.2808	orf19.5958	CDR2	CaO19.13379|orf19.13379|IPF21286.1|IPF63.1|Contig4-3087_0024|CA6099|orf6.9079|CaO19.5958	ORF|Verified	Ca21chr3_C_albicans_SC5314	1047995	1052494	W	CAL0003382	Multidrug transporter, ATP-binding cassette (ABC) superfamily; transports phospholipids, in-to-out direction; overexpressed in azole-resistant isolates; repressed in young biofilms
2.2808	orf19.5959	NOP14	orf19.13380|IPF21162.1|IPF61.1|Contig4-3087_0022|orf6.9078|CA6098|CaO19.5959|CaO19.13380|IPF61	ORF|Verified	Ca21chr3_C_albicans_SC5314	1052844	1055372	W	CAL0003384	Putative nucleolar protein; Hap43-induced; mutation confers resistance to 5-fluorocytosine (5-FC), 5-fluorouracil (5-FU), and tubercidin (7-deazaadenosine); heterozygous mutant is resistant to parnafungin; Spider biofilm induced
2.2808	orf19.5960	NCE102	CaO19.5960|orf19.13381|IPF21265.1|IPF59.1|Contig4-3087_0018|orf6.9077|CA6097|CaO19.13381	ORF|Verified	Ca21chr3_C_albicans_SC5314	1057272	1056760	C	CAL0003396	Non classical protein export protein; localized to plasma membrane; Hap43-induced gene; flow model biofilm induced; Spider biofilm induced
2.2808	orf19.5961		orf19.13382|IPF21255.1|IPF56.1|Contig4-3087_0009|orf6.9076|CA6096|CaO19.5961|NAS6|CaO19.13382|IPF56	ORF|Uncharacterized	Ca21chr3_C_albicans_SC5314	1060429	1059680	C	CAL0003397	Protein of unknown function
2.2808	orf19.5962	HGT4	orf19.13383|IPF21175.1|IPF55.1|Contig4-3087_0008|orf6.9075|CA6095|CaO19.5962|CaO19.13383|SNF3	ORF|Verified	Ca21chr3_C_albicans_SC5314	1063075	1060829	C	CAL0003398	Glucose and galactose sensor; fermentation, filamentation, virulence roles; 20-member glucose transporter family; extended C terminus; high-glucose repressed; macrophage induced; flow model biofilm repressed; Spider biofilm induced
2.2808	orf19.5963		orf19.13384|IPF21231.1|IPF53.2|Contig4-3087_0005|Contig4-3087_0007|orf6.9074|CA6094|IPF53|CaO19.5963|CaO19.13384	ORF|Uncharacterized	Ca21chr3_C_albicans_SC5314	1064248	1065297	W	CAL0003399	Putative prenyltransferase; essential gene in S. cerevisiae; Spider biofilm induced
2.2808	orf19.5964	ARF2	orf19.13385|IPF21268.1|IPF50.2|Contig4-3087_0003|orf6.9073|CA6093|ARF22|CaO19.5964|CaO19.13385	ORF|Verified	Ca21chr3_C_albicans_SC5314	1066235	1066780	W	CAL0003401	Putative ADP-ribosylation factor; mutation confers hypersensitivity to Brefeldin A; Spider biofilm repressed
2.2808	orf19.5964.2	RPL35	IPF21319.1|IPF47.1|Contig4-3087_0001|CA6092|RPL35.3	ORF|Uncharacterized	Ca21chr3_C_albicans_SC5314	1067946	1068748	W	CAF0007060	Ribosomal protein; downregulation correlates with clinical development of fluconazole resistance; colony morphology-related gene regulation by Ssn6; Hap43-induced; Spider biofilm repressed
2.2808	orf19.5965		orf19.13386|IPF21338.1|IPF46.2|Contig4-3042_0001|Contig4-3042_0002|Contig4-3042_0003|orf6.9072|CA6091|CaO19.13386|UFD2|CaO19.5965	ORF|Uncharacterized	Ca21chr3_C_albicans_SC5314	1072234	1069007	C	CAL0003403	Protein of unknown function
2.2808	orf19.5966		orf19.13387|IPF21294.1|IPF27869.1|orf6.9071|CaO19.5966|CaO19.13387	ORF|Dubious	Ca21chr3_C_albicans_SC5314	1072430	1072771	W	CAL0003405	Protein of unknown function
2.2808	orf19.5967	FGR44	orf19.13388|IPF21226.1|IPF44.1|Contig4-3042_0010|orf6.9070|CA6090|CaO19.5967|IPF44|CaO19.13388	ORF|Verified	Ca21chr3_C_albicans_SC5314	1073190	1074422	W	CAL0003407	Protein lacking an ortholog in S. cerevisiae; transposon mutation affects filamentous growth
2.2808	orf19.5968	RDI1	orf19.13389|IPF21259.1|IPF40.1|Contig4-3042_0013|orf6.9069|CA6089|CaO19.5968|CaO19.13389	ORF|Verified	Ca21chr3_C_albicans_SC5314	1075120	1075731	W	CAL0003409	Putative rho GDP dissociation inhibitor; transposon mutation affects filamentous growth; farnesol, filament-induced; regulated by Nrg1, Tup1; protein levels low in stationary phase yeast
2.2808	orf19.5970		CaO19.13391|orf19.13391|IPF21158.1|IPF37.1|HPR5|Contig4-3042_0014|Contig4-3042_0015|orf6.9067|CA6088|CaO19.5970	ORF|Uncharacterized	Ca21chr3_C_albicans_SC5314	1078751	1076163	C	CAL0003422	Putative DNA repair helicase; transcriptionally induced by interaction with macrophage; fungal-specific (no human or murine homolog)
2.2808	orf19.5971		orf19.13392|IPF21189.1|IPF36.1|Contig4-3042_0016|orf6.9066|CA6087|CaO19.5971|CaO19.13392|YHV1	ORF|Uncharacterized	Ca21chr3_C_albicans_SC5314	1078990	1080834	W	CAL0003423	Protein of unknown function
2.2808	orf19.5973	PHB2	orf19.13394|IPF21245.1|IPF33.1|Contig4-3042_0017|orf6.9064|CA6086|CaO19.13394|CaO19.5973	ORF|Verified	Ca21chr3_C_albicans_SC5314	1081109	1082020	W	CAL0003424	Prohibitin 2; plasma membrane localized
2.2808	orf19.5974	ATG9	orf19.13395|IPF21152.1|IPF32.2|Contig4-3042_0018|orf6.9063|CA6085|CaO19.13395|IPF32|CaO19.5974	ORF|Verified	Ca21chr3_C_albicans_SC5314	1085081	1082223	C	CAL0003426	Protein similar to S. cerevisiae Atg9; required for early step in autophagy; required for cytoplasm to vacuole trafficking of Lap41; Spider biofilm induced
2.2808	orf19.5975	TRY4	CaO19.5975|orf19.13396|IPF21248.1|IPF29.1|Contig4-3042_0024|orf6.9062|CA6084|IPF29|CaO19.13396	ORF|Verified	Ca21chr3_C_albicans_SC5314	1087655	1088515	W	CAL0003428	C2H2 transcription factor; fluconazole-repressed; induced in ssr1 mutant; required for yeast cell adherence to silicone substrate; Spider biofilm induced
2.2808	orf19.5976		orf19.13397|IPF21218.1|IPF26.1|IPF26|Contig4-3042_0027|orf6.9061|CA6083|CaO19.5976|CaO19.13397	ORF|Uncharacterized	Ca21chr3_C_albicans_SC5314	1090003	1091343	W	CAL0003430	Protein of unknown function; ortholog of S. cerevisiae Urn1; downregulated by fluphenazine treatment, in azole-resistant strains that overexpress CDR1 and CDR2 or MDR1
2.2808	orf19.5977	CEM1	orf19.13398|IPF21215.1|IPF25.1|Contig4-3042_0029|orf6.9060|CA6082|CaO19.5977|CaO19.13398	ORF|Uncharacterized	Ca21chr3_C_albicans_SC5314	1091392	1092717	W	CAL0003432	Protein similar to S. cerevisiae Cem1p, an acyl carrier protein involved in fatty acid biosynthesis; likely to be essential for growth, based on an insertional mutagenesis strategy
2.2808	orf19.5978		orf19.13399|IPF21217.1|IPF24.1|Contig4-3042_0030|Contig4-3042_0031|orf6.9059|CA6081|IPF24|FZD6|CaO19.13399|CaO19.5978	ORF|Uncharacterized	Ca21chr3_C_albicans_SC5314	1093296	1094510	W	CAL0003435	Protein of unknown function
2.2808	orf19.5980		orf19.13401|IPF21196.1|IPF21.1|Contig4-3042_0033|orf6.9057|CA6080|IPF21|CaO19.5980|CaO19.13401	ORF|Uncharacterized	Ca21chr3_C_albicans_SC5314	1096283	1094553	C	CAL0003448	Protein of unknown function; Hap43-repressed gene
2.2808	orf19.5982	RPL18	orf19.5981.1|orf19.13403|IPF21165.1|IPF21278.1|IPF18.1|IPF20.1|Contig4-3042_0035|orf6.9055|RPL18B|CA6079|RPL18.exon2	ORF|Uncharacterized	Ca21chr3_C_albicans_SC5314	1097682	1096663	C	CAL0003449	Predicted ribosomal protein; Plc1p-regulated, Tbf1-activated; repressed upon phagocytosis by murine macrophage; Hap43p-induced; Spider biofilm repressed
2.2808	orf19.5984		CaO19.13405|orf19.13405|IPF21238.1|IPF16.1|Contig4-2427_0007|orf6.9053|CA6077|IPF16|CaO19.5984	ORF|Verified	Ca21chr3_C_albicans_SC5314	1098032	1099033	W	CAL0003451	Putative protein of unknown function; homozygous transposon insertion causes decreased colony wrinkling under filamentous growth-inducing conditions, but does not block true hyphal formation in liquid media
2.2808	orf19.5985		orf19.13406|IPF21271.1|IPF15.1|Contig4-2427_0006|orf6.9052|CA6076|PAC10|PAC10.3	ORF|Uncharacterized	Ca21chr3_C_albicans_SC5314	1099723	1099112	C	CAL0003453	Protein of unknown function
2.2808	orf19.5986	THI4	orf19.13407|IPF21233.1|IPF14.1|Contig4-2427_0005|orf6.9051|CA6075|CaO19.13407|CaO19.5986	ORF|Uncharacterized	Ca21chr3_C_albicans_SC5314	1101008	1099944	C	CAL0003455	Thiamine biosynthetic enzyme precursor; repressed during the mating process; stationary phase enriched protein; Spider biofilm induced
2.2808	orf19.5987		orf19.13408|IPF21213.1|IPF11.1|Contig4-2427_0004|orf6.9050|CA6074|CaO19.13408|CaO19.5987|IPF11	ORF|Uncharacterized	Ca21chr3_C_albicans_SC5314	1102832	1101414	C	CAL0003457	Protein of unknown function
2.2808	orf19.5989		orf19.13410|IPF21211.1|IPF9.2|Contig4-2512_0006|orf6.9048|CA6073|HRP1|CaO19.13410|CaO19.5989	ORF|Uncharacterized	Ca21chr3_C_albicans_SC5314	1103543	1104970	W	CAL0003460	Putative cleavage factor I subunit; required for the cleavage and polyadenylation of pre-mRNA 3' ends; Spider biofilm repressed
2.2808	orf19.5991		orf19.13412|IPF21153.1|IPF6.1|Contig4-2512_0001|orf6.9046|CA6072|DBP10|CaO19.5991|CaO19.13412	ORF|Uncharacterized	Ca21chr3_C_albicans_SC5314	1107791	1105065	C	CAL0003464	Protein of unknown function
2.2808	orf19.5992	WOR2	CaO19.13413|ZCF33|orf19.13413|IPF21214.1|IPF4835.1|Contig4-2837_0008|orf6.9045|CA6071|IPF4835|CaO19.5992	ORF|Verified	Ca21chr3_C_albicans_SC5314	1118833	1120173	W	CAL0003465	Zn(II)2Cys6 transcription factor; regulator of white-opaque switching; required for maintenance of opaque state; Hap43-induced
2.2808	orf19.5994	RHB1	orf19.13415|IPF21266.1|IPF4842.1|Contig4-2771_0004|orf6.9043|CA6070|IPF4842|CaO19.5994|CaO19.13415	ORF|Verified	Ca21chr3_C_albicans_SC5314	1126576	1127130	W	CAL0003468	Putative small G protein from the Ras superfamily involved in cell wall integrity and control of filamentous growth under nitrogen starvation
2.2808	orf19.5995	MCA1	CaO19.5995|orf19.13416|IPF21216.1|IPF4847.1|Contig4-2771_0005|orf6.9042|CA6069|CaO19.13416|IPF4847	ORF|Verified	Ca21chr3_C_albicans_SC5314	1128917	1127571	C	CAL0003470	Putative cysteine protease with similarity to S. cerevisiae Mca1p; has a role in apoptotic cell death upon H2O2 treatment; fungal-specific (no human or murine homolog); farnesol-induced
2.2808	orf19.5996.1	RPS19A	IPF21287.1|IPF4849.1|Contig4-2771_0008|CA6068|RPS19A.3	ORF|Uncharacterized	Ca21chr3_C_albicans_SC5314	1130360	1131164	W	CAF0007061	Putative ribosomal protein S19; protein level decreases in stationary phase cultures; Spider biofilm repressed
2.2808	orf19.5999	DYN1	CaO19.13420|orf19.13420|IPF21224.1|IPF19819.1|Contig4-2771_0009|orf6.9038|CA6067|CaO19.5999	ORF|Verified	Ca21chr3_C_albicans_SC5314	1143879	1131394	C	CAL0003475	Dynein heavy chain; motor protein that moves to microtubule minus end; required for yeast cell separation, spindle positioning, nuclear migration, hyphal growth; regulated by Mig1, Hap43; flow model and rat catheter biofilm repressed
2.2808	orf19.6000	CDR1	CaO19.6000|orf19.13421|IPF21285.1|IPF9739.2|Contig4-1997_0005|CA6066|CaO19.13421|orf6.9037	ORF|Verified	Ca21chr3_C_albicans_SC5314	1146153	1150658	W	CAL0005016	Multidrug transporter of ABC superfamily; transports phospholipids in an in-to-out direction; induced by beta-estradiol, progesterone, corticosteroid, or cholesterol; Spider biofilm induced
2.64756	orf19.6001	SAP3	orf19.13422|IPF21229.1|IPF8313.1|Contig4-1997_0001|orf6.9036|CA6065|CaO19.6001|CaO19.13422	ORF|Verified	Ca21chr3_C_albicans_SC5314	1151759	1152955	W	CAL0005017	Secreted aspartyl proteinase, acts in utilization of protein as nitrogen source; assessment of virulence role complicated by URA3 effects; regulated by growth phase; produced by opaque phase cells; alpha-pheromone repressed
2.64756	orf19.6002	RPL8B	orf19.13423|IPF21253.1|IPF8312.2|Contig4-1997_0002|orf6.9035|CA6064|RPL81|RPL8B-1|CaO19.6002|CaO19.13423	ORF|Uncharacterized	Ca21chr3_C_albicans_SC5314	1154042	1153254	C	CAL0005018	Predicted ribosomal protein; regulated upon yeast-hypha switch; repressed upon phagocytosis by murine macrophage; Spider biofilm repressed
2.64756	orf19.6003		orf19.13424|IPF21190.1|IPF8311.1|Contig4-1997_0004|Contig4-2656_0014|orf6.9034|CA6063|CaO19.6003|IPF8311|CaO19.13424	ORF|Uncharacterized	Ca21chr3_C_albicans_SC5314	1156316	1154529	C	CAL0005019	Protein of unknown function; role in intracellular signal transduction; Spider biofilm induced
2.64756	sampi-3a		sampi	long_terminal_repeat	Ca21chr3_C_albicans_SC5314	1157986	1158304	W	CAL0121168	Long terminal repeat (LTR); about 324 bp long, 9 copies per genome
2.64756	orf19.6005	HGT5	orf19.13426|IPF21176.1|IPF8307.1|Contig4-2656_0009|orf6.9032|CA6062|CaO19.13426|STL98|IPF8307|CaO19.6005	ORF|Uncharacterized	Ca21chr3_C_albicans_SC5314	1160818	1158584	C	CAL0005021	Putative glucose transporter of the major facilitator superfamily; the C. albicans glucose transporter family comprises 20 members; 12 probable membrane-spanning segments, extended N terminus; expressed in rich medium; Hap43p-repressed
2.64756	orf19.6007		orf19.13428|IPF21227.1|IPF8302.1|Contig4-2656_0006|orf6.9030|CA6061|CaO19.13428|CaO19.6007|IPF8302	ORF|Uncharacterized	Ca21chr3_C_albicans_SC5314	1162680	1161619	C	CAL0005022	Predicted fatty acid acyl transferase-related protein domain; repressed by prostaglandins
2.64756	orf19.6008		CaO19.6008|orf19.13429|IPF21151.1|IPF8301.2|Contig4-2656_0001|orf6.9029|CA6060|IPF8301|CaO19.13429	ORF|Uncharacterized	Ca21chr3_C_albicans_SC5314	1166750	1163925	C	CAL0005023	S. cerevisiae ortholog YLL032C interacts with ribosomes; repressed by alpha pheromone in SpiderM medium
2.64756	orf19.6966		IPF11120.1|Contig4-2580_0006|orf6.7712|CA5014|CaO19.6966|CKI1|IPF11120	ORF|Uncharacterized	Ca21chr3_C_albicans_SC5314	1170277	1168409	C	CAL0000339	Protein of unknown function
2.64756	orf19.6967	USO6	IPF11118.1|Contig4-2580_0004|orf6.7713|CA5015|IPF11118|CaO19.6967	ORF|Uncharacterized	Ca21chr3_C_albicans_SC5314	1171431	1174823	W	CAL0000342	Putative vesicular transport protein; transcript induced by filamentous growth; rat catheter biofilm repressed
2.64756	orf19.6968		IPF7561.2|Contig4-2973_0020|orf6.7714|CA5016|CaO19.6968|IPF7561	ORF|Uncharacterized	Ca21chr3_C_albicans_SC5314	1178346	1181807	W	CAL0000346	Protein of unknown function; Hog1-repressed; Spider biofilm induced
2.64756	orf19.6970		IPF7559|IPF7559.2|Contig4-2973_0019|orf6.7716|CA5017|CaO19.6970	ORF|Uncharacterized	Ca21chr3_C_albicans_SC5314	1182951	1181980	C	CAL0000362	Protein of unknown function
2.64756	orf19.6971	DIE2	IPF7558.1|Contig4-2973_0017|orf6.7717|CA5018|CaO19.6971|IPF7558	ORF|Uncharacterized	Ca21chr3_C_albicans_SC5314	1183347	1184609	W	CAL0000363	Protein of unknown function
2.64756	orf19.6972	SMI1B	SMI1|CaO19.6972|IPF7557.1|Contig4-2973_0016|orf6.7718|CA5019|IPF7557	ORF|Uncharacterized	Ca21chr3_C_albicans_SC5314	1186365	1184713	C	CAL0000365	Putative cell wall assembly regulatory protein; Rim101-repressed; possibly an essential gene, disruptants not obtained by UAU1 method
2.64756	orf19.6973		IPF7556.1|Contig4-2973_0015|orf6.7719|CA5020|LON1|CaO19.6973|IPF7556	ORF|Uncharacterized	Ca21chr3_C_albicans_SC5314	1190746	1186970	C	CAL0000366	ATP-dependent LON protease family member; Hap43-repressed gene; regulated by Gcn2 and Gcn4; Spider biofilm induced
2.64756	orf19.6975	YST1	orf19.6975.1|IPF7549.1|Contig4-2973_0009|orf6.7721|CA5022|RPS0A|CA5021|YST1.exon2	ORF|Verified	Ca21chr3_C_albicans_SC5314	1194311	1193135	C	CAL0000370	Ribosome-associated protein; antigenic in mice; complements S. cerevisiae yst1 yst2 mutant; similar to laminin receptor; predicted S/T phosphorylation, N-glycosylation, myristoylation, Hap43-, Gcn4-regulated; Spider biofilm repressed
2.64756	orf19.6976		IPF7547.2|Contig4-2973_0006|orf6.7722|CA5023|CaO19.6976|IPF7547	ORF|Uncharacterized	Ca21chr3_C_albicans_SC5314	1195444	1197285	W	CAL0000371	Predicted MFS membrane transporter; member of the proton coupled folate transporter/heme carrier protein family; virulence-group-correlated expression; Spider biofilm induced
2.64756	orf19.6977	GPI1	IPF3009.2|orf6.7723|CA5024|CaO19.6977|IPF3009	ORF|Uncharacterized	Ca21chr3_C_albicans_SC5314	1199304	1197358	C	CAL0000374	Putative protein of GPI synthesis; expression is reduced in a fluconazole-resistant isolate
2.64756	orf19.6978		IPF3008.1|Contig4-2646_0001|orf6.7724|CaO19.6978	ORF|Uncharacterized	Ca21chr3_C_albicans_SC5314	1199593	1199264	C	CAL0000377	Planktonic growth-induced gene
2.64756	orf19.6979		IPF3003.1|Contig4-2646_0008|Contig4-2646_0009|orf6.7725|CA5025|CaO19.6979|AMI3	ORF|Uncharacterized	Ca21chr3_C_albicans_SC5314	1201851	1204193	W	CAL0000380	Protein of unknown function
2.64756	orf19.6980		IPF3001.1|Contig4-2646_0012|orf6.7726|CA5026|CaO19.6980|IPF3001	ORF|Uncharacterized	Ca21chr3_C_albicans_SC5314	1205809	1207566	W	CAL0000391	Protein of unknown function
2.64756	orf19.6981		IPF2999.2|Contig4-2646_0013|orf6.7727|CA5027|CaO19.6981|IPF2999	ORF|Uncharacterized	Ca21chr3_C_albicans_SC5314	1207891	1209678	W	CAL0000392	Protein of unknown function
2.64756	orf19.6982		IPF2998.1|Contig4-2116_0001|Contig4-2646_0014|orf6.7728|CA5028|IPF2998|CaO19.6982	ORF|Uncharacterized	Ca21chr3_C_albicans_SC5314	1211103	1209814	C	CAL0000393	Protein of unknown function
2.64756	orf19.6983		IPF2997.1|Contig4-2787_0006|orf6.7729|CA5029|IPF2997|CaO19.6983	ORF|Uncharacterized	Ca21chr3_C_albicans_SC5314	1217360	1216188	C	CAL0000394	Protein of unknown function; Hap43-repressed gene; repressed by nitric oxide; Spider biofilm induced
2.64756	orf19.6984		IPF2988.1|Contig4-2884_0009|Contig4-2884_0010|orf6.7730|CA5030|IPF2988|CaO19.6984|AVT42	ORF|Uncharacterized	Ca21chr3_C_albicans_SC5314	1226768	1229056	W	CAL0000396	Protein of unknown function
2.64756	orf19.6985	TEA1	IPF20023.1|Contig4-2884_0008|orf6.7731|CA5031|IPF20023|CaO19.6985	ORF|Verified	Ca21chr3_C_albicans_SC5314	1229452	1232154	W	CAL0000398	Putative transcription factor with zinc cluster DNA-binding motif; has similarity to S. cerevisiae Tea1p; Hap43p-repressed gene
2.64756	tV(AAC)5	tV(AAC)5		tRNA|Uncharacterized	Ca21chr3_C_albicans_SC5314	1232673	1232600	C	CAF0007250	tRNA-Val, predicted by tRNAscan-SE; AAC anticodon
2.64756	tV(AAC)6	tV(AAC)6		tRNA|Uncharacterized	Ca21chr3_C_albicans_SC5314	1232762	1232689	C	CAF0007251	tRNA-Val, predicted by tRNAscan-SE; AAC anticodon
2.64756	SNRNAU6	SNR6		snRNA|Uncharacterized	Ca21chr3_C_albicans_SC5314	1233630	1233727	W	CAF0007404	Highly conserved U6 small nuclear RNA involved in splicing; ortholog of S. cerevisiae SNR6; gene transcribed by RNA Pol III
2.64756	orf19.6986		IPF2982.1|Contig4-2884_0003|Contig4-2884_0004|orf6.7732|CA5032|IPF2982|MSB3|CaO19.6986	ORF|Uncharacterized	Ca21chr3_C_albicans_SC5314	1234025	1236232	W	CAL0000400	Protein of unknown function
2.64756	orf19.6987	DNM1	IPF2980.1|Contig4-2884_0002|orf6.7733|CA5033|CaO19.6987	ORF|Uncharacterized	Ca21chr3_C_albicans_SC5314	1239019	1236419	C	CAL0000402	Putative dynamin-related GTPase; transcript upregulated inbRHE model of oral candidiasis; transcript regulated by Nrg1, Mig1, and Tup1
2.64756	orf19.6988	OST1	IPF4532.2|Contig4-2640_0001|Contig4-2640_0016|orf6.7734|CA5034|CaO19.6988	ORF|Verified	Ca21chr3_C_albicans_SC5314	1240149	1241561	W	CAL0000404	Alpha subunit of the oligosaccharyltransferase complex of the ER lumen; catalyzes asparagine-linked glycosylation of newly synthesized proteins; Spider biofilm repressed
2.64756	orf19.6989		IPF4531.1|Contig4-2640_0002|orf6.7735|CA5035|CSP14|CaO19.6989|IPF4531	ORF|Uncharacterized	Ca21chr3_C_albicans_SC5314	1241877	1241554	C	CAL0000405	Putative U2 snRNP-associated protein; Spider biofilm induced
2.64756	orf19.6990		IPF4530.1|Contig4-2640_0003|orf6.7736|CA5036|CYP52|CaO19.6990|CPR52|CYP4	ORF|Uncharacterized	Ca21chr3_C_albicans_SC5314	1242794	1242003	C	CAL0000410	Putative peptidyl-prolyl cis-trans isomerase; predicted endoplasmic reticulum (ER) localization
2.64756	orf19.6991	PRE3	IPF4529.1|Contig4-2640_0005|orf6.7737|CA5037|CaO19.6991	ORF|Uncharacterized	Ca21chr3_C_albicans_SC5314	1243214	1243858	W	CAL0000411	Putative beta-1 proteasome subunit; macrophage-induced protein; regulated by Gcn2p and Gcn4p; GlcNAc-induced protein
2.64756	orf19.6992	QDR2	IPF4526.1|Contig4-2640_0010|orf6.7738|CA5038|CaO19.6992	ORF|Verified	Ca21chr3_C_albicans_SC5314	1245133	1246647	W	CAL0000412	Predicted MFS membrane transporter, member of the drug:proton antiporter (12 spanner) (DHA1) family; Spider biofilm induced
2.64756	orf19.6993	GAP2	orf6.7739|IPF4523.2|Contig4-2640_0013|CA5039|GAP13|CaO19.6993	ORF|Verified	Ca21chr3_C_albicans_SC5314	1248654	1246888	C	CAL0000413	General amino acid permease; ketoconazole, flucytosine repressed; Ssy1-dependent histidine induction; regulated by Nrg1, Tup1; colony morphology-related gene regulation by Ssn6; Spider and flow model biofilm induced
2.64756	orf19.6994	BAT22	IPF4517.1|Contig4-2640_0015|orf6.7740|CA5040|CaO19.6994|BAT1	ORF|Uncharacterized	Ca21chr3_C_albicans_SC5314	1251796	1250687	C	CAL0000414	Putative branched chain amino acid aminotransferase; regulated by Gcn4p; induced by farnesol treatment, GlcNAc, amino acid starvation (3-aminotriazole treatment); present in exponential and stationary growth phase yeast cultures
2.64756	orf19.6995	ATO6	IPF4516.1|Contig4-2915_0020|orf6.7741|CA5041|AFF4|CaO19.6995|FRP7	ORF|Uncharacterized	Ca21chr3_C_albicans_SC5314	1253105	1253950	W	CAL0000416	Putative fungal-specific transmembrane protein
2.64756	orf19.6996	MNN14	IPF4514.1|Contig4-2915_0017|orf6.7742|CA5042|CaO19.6996|IPF4514	ORF|Uncharacterized	Ca21chr3_C_albicans_SC5314	1254649	1256706	W	CAL0000417	Predicted alpha-1,3-mannosyltransferase activity with a role in protein glycosylation; Hap43-repressed; Spider biofilm induced
2.64756	orf19.6997	ATO5	IPF4513.1|Contig4-2915_0016|orf6.7743|CA5043|AFF5|CaO19.6997|FRP4	ORF|Verified	Ca21chr3_C_albicans_SC5314	1257416	1258258	W	CAL0000419	Putative fungal-specific transmembrane protein
2.64756	orf19.6998	GTT1	GTT2|IPF4511.1|Contig4-2915_0014|orf6.7744|CA5044|CaO19.6998|GTT14	ORF|Uncharacterized	Ca21chr3_C_albicans_SC5314	1259055	1259858	W	CAL0000420	Putative glutathione S-transferase; downregulated upon adherence to polystyrene; regulated upon white-opaque switching; induced in the presence of human neutrophils; oxidative stress-induced via Cap1p; regulated by Gcn2p, Gcn4p
2.64756	orf19.6999		IPF4510.1|Contig4-2915_0013|orf6.7745|CA5045|CaO19.6999|TCD5|IPF4510	ORF|Uncharacterized	Ca21chr3_C_albicans_SC5314	1260329	1261606	W	CAL0000423	Predicted oxidoreductase; rat catheter biofilm repressed
2.64756	orf19.7001	YCK2	IPF4506.1|Contig4-2915_0003|Contig4-2915_0005|orf6.7747|CA5046|CaO19.7001|YCK21	ORF|Verified	Ca21chr3_C_albicans_SC5314	1263828	1265315	W	CAL0001885	Plasma membrane protein similar to S. cerevisiae casein kinase I, Yck2p; null mutant has defect in damaging oral epithelial cells and in hyphal branching; transcription is activated in weak acid stress or on contact with host cells
2.64756	orf19.7002		IPF4504.1|Contig4-2915_0001|orf6.7748|CA5047|IPF4504|CaO19.7002	ORF|Uncharacterized	Ca21chr3_C_albicans_SC5314	1267346	1266159	C	CAL0001886	Protein of unknown function
2.64756	orf19.7347		IPF7116.1|Contig4-2885_0019|orf6.8507|CA5648|CaO19.7347|UBC6	ORF|Uncharacterized	Ca21chr3_C_albicans_SC5314	1269896	1270627	W	CAL0004643	Protein of unknown function
2.64756	orf19.7348		IPF27310.1|Contig4-2885_0020|orf6.8508|CaO19.7348	ORF|Dubious	Ca21chr3_C_albicans_SC5314	1269897	1269577	C	CAL0004645	Protein of unknown function
2.64756	koppa-3a		koppa	long_terminal_repeat	Ca21chr3_C_albicans_SC5314	1273232	1273025	C	CAL0121169	Long terminal repeat (LTR); about 208 bp long, 10 copies per genome
2.64756	orf19.7349	CHS4	CaO19.7349|SKT5|CSD4|CAL2|IPF7112.1|Contig4-2885_0008|Contig4-2885_0010|orf6.8509|CA5649	ORF|Verified	Ca21chr3_C_albicans_SC5314	1275141	1277396	W	CAL0004647	Activator of Chs3p chitin synthase; required for wild-type wall chitin content, but not for hyphal growth; mutant resistant to Calcofluor white; prenylation and 2 transmembrane segments predicted; functional homolog of S. cerevisiae Chs4p
2.64756	orf19.7350	RCT1	IPF7109.2|Contig4-2885_0005|orf6.8510|CA5650|CaO19.7350|IPF7109	ORF|Uncharacterized	Ca21chr3_C_albicans_SC5314	1279189	1279764	W	CAL0004665	Fluconazole-induced protein; Ras1, Cyr1 repressed and Efg1 induced; regulated by Nrg1, Tup1, Tbf1, Ssn6; induced in oralpharyngeal candidasis; rat catheter biofilm repressed
2.64756	orf19.7353		IPF7105.2|Contig4-2885_0001|orf6.8513|CA5651|KIP3|CaO19.7353	ORF|Uncharacterized	Ca21chr3_C_albicans_SC5314	1282917	1279999	C	CAL0004669	Protein of unknown function
2.64756	orf19.7354	LAC1	IPF19815.1|Contig4-2885_0022|orf6.8514|CA5652|CaO19.7354|IPF19815	ORF|Verified	Ca21chr3_C_albicans_SC5314	1284965	1283682	C	CAL0004672	Ceramide synthase; required for biosynthesis of ceramides with C18:0 fatty acids, which serve as precursors for glucosylsphingolipids; caspofungin induced
2.64756	orf19.7355	SSN8	IPF15544.1|Contig4-2029_0005|orf6.8515|CA5653|CaO19.7355|CYCC	ORF|Verified	Ca21chr3_C_albicans_SC5314	1287826	1286522	C	CAL0004675	Ortholog of S. cerevisiae Ssn8; a component of RNA polymerase II holoenzyme; mutants are viable and are sensitive to hydrogen peroxide medium
2.64756	orf19.7356		IPF15543.2|Contig4-2029_0008|orf6.8516|CA5654|IPF15543|CaO19.7356	ORF|Uncharacterized	Ca21chr3_C_albicans_SC5314	1288552	1288220	C	CAL0004677	Protein of unknown function
2.64756	orf19.7357		IPF18080.1|orf6.8517|CA5655|CaO19.7357|IPF18080.3f|IPF18080	ORF|Uncharacterized	Ca21chr3_C_albicans_SC5314	1289707	1290753	W	CAL0004679	Protein of unknown function
2.64756	orf19.7358	SAM50	IPF14683.2|Contig4-2195_0001|orf6.8518|CA5656|IPF14683|CaO19.7358	ORF|Verified	Ca21chr3_C_albicans_SC5314	1292372	1290849	C	CAL0004681	Predicted component of the SAM complex involved in mitochondrial protein import
2.64756	orf19.7359	CRZ1	IPF14682.2|Contig4-2195_0002|orf6.8519|CA5657|CaO19.7359|IPF14682	ORF|Verified	Ca21chr3_C_albicans_SC5314	1295013	1292818	C	CAL0004683	Calcineurin-regulated C2H2 transcription factor; role in maintenance of membrane integrity, azole tolerance; not required for mouse virulence; repressed by low iron; regulates Ca++ influx during alkaline pH response; Spider biofilm induced
2.64756	orf19.7360		IPF1242.2|Contig4-2926_0026|orf6.8520|CA5658|IPF1242|CaO19.7360	ORF|Uncharacterized	Ca21chr3_C_albicans_SC5314	1298648	1298172	C	CAL0004703	Protein of unknown function
2.64756	orf19.7361		IPF1243.1|Contig4-2926_0024|orf6.8521|CA5659|SEN54|CaO19.7361	ORF|Uncharacterized	Ca21chr3_C_albicans_SC5314	1298893	1300311	W	CAL0004706	Protein of unknown function
3.62178	orf19.7362	SKN1	orf6.8522|IPF1245.1|Contig4-2926_0022|Contig4-2926_0023|CA5660|SKN1.3|SKN1.3f	ORF|Uncharacterized	Ca21chr3_C_albicans_SC5314	1302586	1300373	C	CAL0004709	Protein with a role in beta-1,6-glucan synthesis; probable N-glycosylated type II membrane protein; transcript and mRNA length change induced by yeast-hypha transition; induced by Rim101, caspofungin; rat catheter and Spider biofilm induced
3.62178	snR44d			snoRNA|Uncharacterized	Ca21chr3_C_albicans_SC5314	1305827	1305932	W	CAL0126344	H/ACA box small nucleolar RNA (snoRNA)
3.62178	orf19.7363	KRE6	IPF1249.2|Contig4-2926_0012|orf6.8523|CA5661|CaO19.7363	ORF|Verified	Ca21chr3_C_albicans_SC5314	1306201	1308423	W	CAL0004712	Essential beta-1,6-glucan synthase subunit; change in mRNA length, not abundance, at yeast-hypha transition; alkaline induced by Rim101, on cell wall regeneration; Spider biofilm induced; Bcr1-repressed in RPMI a/a biofilms
3.46	orf19.7364		IPF1250.2|Contig4-2926_0007|orf6.8524|CA5662|IPF1250|CaO19.7364	ORF|Uncharacterized	Ca21chr3_C_albicans_SC5314	1309949	1311559	W	CAL0004715	Protein of unknown function
3.46	orf19.7365		IPF1251.1|Contig4-2926_0004|orf6.8525|CA5663|FYV10|CaO19.7365|IPF1251	ORF|Uncharacterized	Ca21chr3_C_albicans_SC5314	1312259	1313977	W	CAL0004719	Protein of unknown function
3.46	orf19.7366		IPF1252.1|Contig4-2926_0003|orf6.8526|CA5664|CaO19.7366|IPF1252	ORF|Uncharacterized	Ca21chr3_C_albicans_SC5314	1315064	1314003	C	CAL0004722	Protein of unknown function
3.46	orf19.7367	UBP1	IPF1255.1|Contig4-2926_0029|orf6.8527|CA5665|CaO19.7367	ORF|Uncharacterized	Ca21chr3_C_albicans_SC5314	1317812	1315398	C	CAL0004724	Protein of unknown function
3.46	orf19.7368		IPF1257.1|Contig4-3075_0021|orf6.8528|CA5666|CaO19.7368|PUB1	ORF|Uncharacterized	Ca21chr3_C_albicans_SC5314	1320481	1318949	C	CAL0004726	Protein of unknown function
3.46	orf19.7369	TRM12	IPF1259.1|Contig4-3093_0001|orf6.8529|CA5667|IPF1259|CaO19.7369	ORF|Uncharacterized	Ca21chr3_C_albicans_SC5314	1321965	1323224	W	CAL0004728	Protein of unknown function
3.46	orf19.7370		IPF1261.1|Contig4-3093_0003|orf6.8530|CA5668|IPF1261|CaO19.7370	ORF|Uncharacterized	Ca21chr3_C_albicans_SC5314	1323800	1324795	W	CAL0004748	Possible G-protein coupled receptor; vacuolar membrane transporter for cationic amino acids; PQ-loop motif; rat catheter and Spider biofilm induced
3.46	orf19.7371	ZCF35	IPF1264.2|Contig4-3093_0006|orf6.8531|CA5669|CaO19.7371|IPF1264	ORF|Uncharacterized	Ca21chr3_C_albicans_SC5314	1325561	1328869	W	CAL0004750	Zn(II)2Cys6 transcription factor; Hap43-induced; Spider biofilm induced
3.46	orf19.7372	MRR1	IPF1266.1|Contig4-3093_0008|orf6.8532|CA5670|HAP1|CaO19.7372|ZCF36|IPF1266	ORF|Verified	Ca21chr3_C_albicans_SC5314	1329371	1332697	W	CAL0004753	Putative Zn(II)2Cys6 transcription factor; regulator of MDR1 transcription; gain-of-function mutations cause upregulation of MDR1 (a plasma membrane multidrug efflux pump) and multidrug resistance; Hap43-induced
3.46	orf19.7374	CTA4	IPF1269.1|Contig4-3093_0011|orf6.8534|CA5671|CaO19.7374	ORF|Verified	Ca21chr3_C_albicans_SC5314	1333933	1336983	W	CAL0004760	Zn(II)2Cys6 transcription factor; induced by nitric oxide; induced by Mnl1 under weak acid stress; repressed upon adherence to polystyrene; Hap43-repressed; Spider biofilm induced
3.46	orf19.7375		IPF1271.1|Contig4-3093_0012|orf6.8535|CA5672|IPF1271|CaO19.7375|USA1|U1A	ORF|Uncharacterized	Ca21chr3_C_albicans_SC5314	1337711	1337097	C	CAL0004764	Putative U1A component of the U1 snRNP, involved in splicing; contains two RNA recognition motifs (RRMs); ortholog of S. cerevisiae MUD1
3.46	orf19.7376		IPF1272.1|Contig4-3093_0013|orf6.8536|CA5673|IPF1272|CaO19.7376	ORF|Uncharacterized	Ca21chr3_C_albicans_SC5314	1337894	1340182	W	CAL0004767	Protein of unknown function
3.46	orf19.7377	ASE1	CaO19.7377|IPF1274.2|Contig4-3093_0015|Contig4-3093_0018|orf6.8537|CA5674|IPF1274	ORF|Uncharacterized	Ca21chr3_C_albicans_SC5314	1340550	1343270	W	CAL0004769	Putative microtubule-associated protein; member of conserved Mcm1p regulon; periodic mRNA expression, peak at cell-cycle G2/M phase
3.46	orf19.7378		IPF1276.1|Contig4-3093_0019|orf6.8538|CA5675|SIS2|CaO19.7378	ORF|Uncharacterized	Ca21chr3_C_albicans_SC5314	1345056	1343440	C	CAL0004771	Protein of unknown function
3.46	orf19.7379	FAA2	IPF1278.1|Contig4-3093_0023|orf6.8539|CA5676|FAA2-4|FAA22|CaO19.7379|FAA24	ORF|Uncharacterized	Ca21chr3_C_albicans_SC5314	1347975	1345711	C	CAL0004773	Putative acyl CoA synthetase; expression regulated upon white-opaque switch; rat catheter biofilm induced; Spider biofilm induced
3.46	orf19.7380		IPF1286.1|Contig4-3093_0029|orf6.8540|CA5677|IPF1286	ORF|Uncharacterized	Ca21chr3_C_albicans_SC5314	1352462	1349946	C	CAL0004791	Protein of unknown function
3.46	orf19.7381	AHR1	IPF1292|IPF1292.1|Contig4-3093_0048|orf6.8541|CA5678|CaO19.7381|ZCF37	ORF|Verified	Ca21chr3_C_albicans_SC5314	1362620	1364494	W	CAL0004794	Zn(II)2Cys6 transcription factor; involved in regulation of adhesion genes; involved in white-opaque switch; forms complex with Mcm1; mutant is sensetive to 5-fluorocytosine and lithium chloride; Spider biofilm induced
3.46	orf19.7382	CAM1	IPF1299.1|IPF1296.1|Contig4-3093_0051|orf6.8542|orf19.7381.3|CA5679|CA5680|CAM1.exon2	ORF|Uncharacterized	Ca21chr3_C_albicans_SC5314	1366732	1368199	W	CAL0004797	Putative translation elongation factor eEF1 gamma; protein level decreased in stationary phase cultures; Spider biofilm repressed
3.46	orf19.7383	MNN9	IPF1301.1|Contig4-3093_0053|Contig4-3093_0054|orf6.8543|CA5681|CaO19.7383	ORF|Verified	Ca21chr3_C_albicans_SC5314	1368781	1369887	W	CAL0004800	Protein of N-linked outer-chain mannan biosynthesis; mutant has defective cell wall; required for wild-type hyphal growth; mutant is hygromycin B sensitive and vanadate resistant; has N-terminal membrane-spanning segment (positions 18-34)
3.46	orf19.7384	NOG1	IPF1302.2|Contig4-3036_0030|orf6.8544|CA5682|CaO19.7384	ORF|Verified	Ca21chr3_C_albicans_SC5314	1370294	1372216	W	CAL0004804	Putative GTPase; mutation confers hypersensitivity to 5-fluorocytosine (5-FC), 5-fluorouracil (5-FU), and tubercidin (7-deazaadenosine); repressed by prostaglandins; Hap43-induced
3.46	orf19.7385		IPF3333.1|Contig4-3036_0025|orf6.8545|CA5683|CaO19.7385|LEE1|IPF3333	ORF|Uncharacterized	Ca21chr3_C_albicans_SC5314	1373821	1375326	W	CAL0004807	CCCH zinc finger protein; Spider biofilm induced
3.46	orf19.7386		IPF3331.1|Contig4-3036_0022|orf6.8546|CA5684|MBA1|CaO19.7386|IPF3331	ORF|Uncharacterized	Ca21chr3_C_albicans_SC5314	1376387	1375512	C	CAL0004810	Protein of unknown function
3.46	orf19.7387	ELP3	IPF3330.1|Contig4-3036_0021|orf6.8547|CA5685|CaO19.7387|HPA1	ORF|Uncharacterized	Ca21chr3_C_albicans_SC5314	1376656	1378299	W	CAL0004812	Predicted histone acetyltransferase; role in regulation of transcription, tRNA wobble uridine modification; Spider biofilm induced
3.46	orf19.7388	PBS2	CaO19.7388|IPF3329.1|Contig4-3036_0020|orf6.8548|CA5686|IPF3329	ORF|Verified	Ca21chr3_C_albicans_SC5314	1380059	1378422	C	CAL0004814	MAPK kinase (MAPKK); role in osmotic and oxidative stress responses, oxidative stress adaptation; required for stress regulation of Hog1p localization and activity; functional homolog of S. cerevisiae Pbs2p
3.46	orf19.7389	REV3	IPF3327.2|Contig4-3036_0014|Contig4-3036_0018|orf6.8549|orf6.8550|CA5687|CA5689|orf19.7390|REV3.5F	ORF|Uncharacterized	Ca21chr3_C_albicans_SC5314	1380646	1385538	W	CAL0004816	Protein of unknown function
3.46	orf19.7391	OCH1	IPF3324.1|Contig4-3036_0012|orf6.8551|CA5690|CaO19.7391	ORF|Verified	Ca21chr3_C_albicans_SC5314	1386772	1385615	C	CAL0004830	Alpha-1,6-mannosyltransferase; initiates N-glycan outer chain branch addition; similar to S. cerevisiae Och1p; required for wild-type virulence in mouse intravenous infection; fungal-specific (no human or murine homolog)
3.46	orf19.7392	DED1	Contig4-3036_0007|orf6.8552|CA5691|IPF3320.1|CaO19.7392	ORF|Uncharacterized	Ca21chr3_C_albicans_SC5314	1390000	1387982	C	CAL0004832	Predicted ATP-dependent RNA helicase; RNA strand annealing activity; Spider biofilm induced
3.46	orf19.7393		IPF3316.1|Contig4-3036_0004|Contig4-3036_0005|orf6.8553|CA5692|CaO19.7393|UTR1	ORF|Uncharacterized	Ca21chr3_C_albicans_SC5314	1392923	1391145	C	CAL0004835	Predicted NAD+/NADH kinase; possible role in cellular iron ion homeostasis; Spider biofilm induced
3.46	orf19.7394	GDA1	IPF3313.1|Contig4-3036_0003|orf6.8554|CA5693|CaO19.7394	ORF|Verified	Ca21chr3_C_albicans_SC5314	1395621	1393822	C	CAL0004837	Golgi membrane GDPase, required for wild-type O-mannosylation, not N-glycosylation; required for wild-type hyphal induction, cell wall, and cell surface charge; not required for HeLa cell adherence; functional homolog of S. cerevisiae Gda1p
3.46	orf19.7395		IPF27313.1|orf6.8555|CaO19.7395	ORF|Dubious	Ca21chr3_C_albicans_SC5314	1395705	1396022	W	CAL0004840	Protein of unknown function
3.46	orf19.7396		IPF3311.2|Contig4-2982_0013|orf6.8556|CA5694|IPF3311|CaO19.7396	ORF|Uncharacterized	Ca21chr3_C_albicans_SC5314	1397110	1398315	W	CAL0004843	Protein of unknown function; Spider biofilm induced; Hap43-repressed
2.41	orf19.7397.1			ORF|Uncharacterized	Ca21chr3_C_albicans_SC5314	1403269	1402484	C	CAL0126163	Predicted ORF identical to NSA2
2.41	orf19.7397.3			ORF|Uncharacterized	Ca21chr3_C_albicans_SC5314	1405127	1404336	C	CAL0126161	Predicted ORF identical to orf19.7420
2.41	orf19.7417	TSA1	orf6.8577|IPF2431.1|Contig4-2982_0001|CA5714|TSA1A|IPF2431|CA5697|IPF18076.3f|IPF18076.1|CaO19.7417	ORF|Verified	Ca21chr3_C_albicans_SC5314	1406632	1406042	C	CAL0005458	TSA/alkyl hydroperoxide peroxidase C (AhPC) family protein; similar to thiol-dependent peroxidases of oxidative stress signaling; antigenic; hyphal surface, nucleus; yeast-form nucleus, cytoplasm; biofilm, phagocytosis, peroxide induced
2.41	orf19.7414	ALS6	IPF2663.2|Contig4-2957_0018|orf6.2110|CA5713|ALS97|CaO19.7414|orf6.8574	ORF|Verified	Ca21chr3_C_albicans_SC5314	1411972	1407872	C	CAL0005457	ALS family protein; expression in S. cerevisiae confers adhesion to gelatin; macrophage-induced gene; N-terminal adhesion domain; ALS family includes cell-surface glycoproteins, some with adhesin function
2.41	orf19.7413	MMS21	IPF2657.1|Contig4-2957_0012|orf6.8573|CA5712|CaO19.7413|IPF2657	ORF|Uncharacterized	Ca21chr3_C_albicans_SC5314	1416935	1416117	C	CAL0005456	Putative MMS21-SMC5-SMC6 complex component
2.41	orf19.7412	MUB1	IPF2656.1|Contig4-2957_0011|orf6.8572|CA5711|CaO19.7412	ORF|Uncharacterized	Ca21chr3_C_albicans_SC5314	1419477	1417276	C	CAL0005455	Predicted protein required for ubiquitination; role in meiosis, regulation of cell budding in S. cereviae; Spider biofilm induced
2.41	orf19.7411	OAC1	IPF2654.1|Contig4-2957_0008|orf6.8571|CA5710|CaO19.7411	ORF|Uncharacterized	Ca21chr3_C_albicans_SC5314	1420988	1419936	C	CAL0005454	Putative mitochondrial inner membrane transporter; rat catheter biofilm induced
2.41	orf19.7410	CYM1	IPF2653|IPF2653.1|Contig4-2957_0004|orf6.8570|CA5709|CaO19.7410	ORF|Uncharacterized	Ca21chr3_C_albicans_SC5314	1421546	1424650	W	CAL0005453	Putative metalloprotease of the mitochondrial intermembrane space; rat catheter biofilm induced
2.41	orf19.7409.1		IPF2652.2|CA5708|MRPL39	ORF|Uncharacterized	Ca21chr3_C_albicans_SC5314	1424951	1424739	C	CAF0007122	Protein of unknown function
2.41	orf19.7409	ERV25	IPF2651.2|Contig4-3029_0001|orf6.8569|CA5707|CaO19.7409	ORF|Verified	Ca21chr3_C_albicans_SC5314	1425325	1425972	W	CAL0005428	Component of COPII-coated vesicles; transcript induced upon filamentous growth; rat catheter biofilm repressed
2.41	orf19.7406		IPF2649.1|Contig4-3029_0002|orf6.8566|CA5706|SEC20|CaO19.7406|IPF2649	ORF|Uncharacterized	Ca21chr3_C_albicans_SC5314	1428029	1425969	C	CAL0005427	Protein of unknown function
2.41	orf19.7405		IPF2645.2|Contig4-3029_0003|orf6.8565|CA5705|CaO19.7405|IPF2645	ORF|Uncharacterized	Ca21chr3_C_albicans_SC5314	1429273	1428569	C	CAL0005426	Ortholog of Rad33; involved in nucleotide excision repair in S. cerevisiae; induced by Mnl1 under weak acid stress
2.41	orf19.7404		IPF2644.2|Contig4-3029_0004|orf6.8564|CA5704|CHA11|CaO19.7404|CHA1	ORF|Uncharacterized	Ca21chr3_C_albicans_SC5314	1429705	1430703	W	CAL0005425	Catabolic L-serine (L-threonine) deaminase;, catalyzes degradation of L-serine and L-threonine; required to use serine or threonine as a sole nitrogen source; Spider biofilm repressed
2.41	orf19.7403		IPF2643.1|Contig4-3029_0008|orf6.8563|CA5703|CaO19.7403|IPF2463	ORF|Uncharacterized	Ca21chr3_C_albicans_SC5314	1431432	1433687	W	CAL0005424	Protein of unknown function
2.41	orf19.7402	DOT1	IPF2639.1|Contig4-3029_0012|orf6.8562|CA5702|CaO19.7402|PCH1	ORF|Uncharacterized	Ca21chr3_C_albicans_SC5314	1434292	1438323	W	CAL0005423	Putative modulator of white-opaque switching
2.41	orf19.7401	ISW2	IPF2633.1|Contig4-3029_0013|CA5701|CaO19.7401|orf6.8561	ORF|Verified	Ca21chr3_C_albicans_SC5314	1441679	1438509	C	CAL0005422	Ortholog of S. cerevisiae Isw2; an ATPase involved in chromatin remodeling; required for chlamydospore formation; Hap43-induced gene; repressed by high-level peroxide stress
2.41	orf19.7400	ALS7	CaO19.7400|IPF19816.1|Contig4-2957_0018|CA5699|ALS94|ALS95|ALS96|ALS98|orf6.8560	ORF|Verified	Ca21chr3_C_albicans_SC5314	1446611	1451317	W	CAL0005421	ALS family protein; hypermutable contingency gene; growth-regulated, downregulated in biofilm; two variable repeat regions; expression in S. cerevisiae does not confer adhesiveness; ALS family includes adhesins, cell-surface glycoproteins
2.41	orf19.7398.1	TSA1B	IPF18075.2|CA5698|TSA1|IPF10875.5f	ORF|Verified	Ca21chr3_C_albicans_SC5314	1452471	1453061	W	CAF0007120	Putative peroxidase; orf19.7398.1 is contig-truncated fragment of gene identical to TSA1; Tsa1p and Tsa1Bp role under oxidative/reductive stress, hyphal cell wall formation; in hyphal nucleus, cell wall; yeast-form nucleus, cytoplasm
2.41	orf19.7419	HNT2	IPF2434.1|Contig4-2982_0003|orf6.8579|CA5715|CaO19.7419	ORF|Uncharacterized	Ca21chr3_C_albicans_SC5314	1453313	1453855	W	CAL0005459	Putative dinucleoside triphosphate hydrolase; induced upon low-level peroxide stress
2.41	orf19.7420		IPF2436.1|Contig4-2982_0004|orf6.8580|CA5716|CaO19.7420|MED6	ORF|Uncharacterized	Ca21chr3_C_albicans_SC5314	1453974	1454765	W	CAL0005486	Protein of unknown function
2.41	orf19.7421	CYP5	IPF2438.1|Contig4-2982_0006|orf6.8581|CA5717|CYP51|CaO19.7421|CPR51|CYP3	ORF|Verified	Ca21chr3_C_albicans_SC5314	1455477	1454866	C	CAL0005487	Putative peptidyl-prolyl cis-trans isomerase; macrophage-downregulated protein level; protein level decrease in stationary phase cultures; predicted endoplasmic reticulum (ER) localization
2.41	orf19.7422		LCP5|CaO19.7422|IPF2440.1|Contig4-2982_0008|orf6.8582|CA5718	ORF|Uncharacterized	Ca21chr3_C_albicans_SC5314	1456909	1455737	C	CAL0005488	Protein of unknown function
2.41	orf19.7424	NSA2	IPF2441.1|Contig4-2982_0009|Contig4-3080_0023|orf6.8584|CA5719|CaO19.7424|IPF2441	ORF|Uncharacterized	Ca21chr3_C_albicans_SC5314	1457022	1457807	W	CAL0005489	Putative protein constituent of 66S pre-ribosomal particles; Hap43-induced; repressed by prostaglandins
Componet (Chr3):	GOID	GO_term	Cluster frequency	Background frequency	Corrected P-value	False discovery rate	Gene(s) annotated to the term	Directly Annotated GOID List
	43227	membrane-bounded organelle	37 out of 57 genes, 64.9%	2746 out of 6473 background genes, 42.4%	0.03952	0.08	C3_05820W_A:KRE6:C3_05860C_A:UBP1:C3_05880C_A:C3_05900W_A:ZCF35:MRR1:CTA4:C3_05940C_A:ASE1:HAL3:AHR1:CAM1:MNN9:NOG1:C3_06050C_A:ELP3:REV3:OCH1:DED1:GDA1:C3_06170C_A:TSA1:MMS21:OAC1:CYM1:C3_06240C_A:ERV25:C3_06280W_A:DOT1:ISW2:TSA1B:C3_06350W_A:CYP5:C3_06370C_A:NSA2	30176:9986:1990143:139:42645:30134:136:30133:16035:9514:5762:16021:30427:71513:30687:5886:790:5880:5844:16592:31429:71627:71004:151:30446:62040:5737:5829:5758:5783:5739:5794:51233:89716:932:5635:8623:5685:5743:9277:5819:5730:16020:5634:5801:137:30915:10494:5576:70847:5853:33588
	43231	intracellular membrane-bounded organelle	36 out of 57 genes, 63.2%	2674 out of 6473 background genes, 41.3%	0.05537	0.07	C3_05820W_A:KRE6:C3_05860C_A:UBP1:C3_05880C_A:C3_05900W_A:ZCF35:MRR1:CTA4:C3_05940C_A:ASE1:HAL3:AHR1:CAM1:MNN9:NOG1:C3_06050C_A:ELP3:REV3:OCH1:DED1:GDA1:C3_06170C_A:TSA1:MMS21:OAC1:CYM1:C3_06240C_A:C3_06280W_A:DOT1:ISW2:TSA1B:C3_06350W_A:CYP5:C3_06370C_A:NSA2	30176:9986:1990143:139:42645:136:30133:16035:9514:5762:30427:16021:71513:30687:5886:790:5880:5844:16592:31429:71627:71004:151:30446:62040:5737:5829:5758:5739:5783:5794:51233:89716:932:5635:8623:5685:5743:9277:5819:16020:5730:5801:5634:137:30915:10494:5576:70847:5853:33588

## Sheet: AMS4397
Supplementary file 4: Coding Sequences within Complex CNVs
Isoalte	Chromosome
AMS4397	Chr3
CNV copy number	ORF ID	Standard Name	Alias	Feature Type	Chromosome	Start Position	Stop Position	Strand	Primary CGD ID	Description
3.31	orf19.5958	CDR2	CaO19.13379|orf19.13379|IPF21286.1|IPF63.1|Contig4-3087_0024|CA6099|orf6.9079|CaO19.5958	ORF|Verified	Ca21chr3_C_albicans_SC5314	1047995	1052494	W	CAL0003382	Multidrug transporter, ATP-binding cassette (ABC) superfamily; transports phospholipids, in-to-out direction; overexpressed in azole-resistant isolates; repressed in young biofilms
3.31	orf19.5959	NOP14	orf19.13380|IPF21162.1|IPF61.1|Contig4-3087_0022|orf6.9078|CA6098|CaO19.5959|CaO19.13380|IPF61	ORF|Verified	Ca21chr3_C_albicans_SC5314	1052844	1055372	W	CAL0003384	Putative nucleolar protein; Hap43-induced; mutation confers resistance to 5-fluorocytosine (5-FC), 5-fluorouracil (5-FU), and tubercidin (7-deazaadenosine); heterozygous mutant is resistant to parnafungin; Spider biofilm induced
3.31	orf19.5960	NCE102	CaO19.5960|orf19.13381|IPF21265.1|IPF59.1|Contig4-3087_0018|orf6.9077|CA6097|CaO19.13381	ORF|Verified	Ca21chr3_C_albicans_SC5314	1057272	1056760	C	CAL0003396	Non classical protein export protein; localized to plasma membrane; Hap43-induced gene; flow model biofilm induced; Spider biofilm induced
3.31	orf19.5961		orf19.13382|IPF21255.1|IPF56.1|Contig4-3087_0009|orf6.9076|CA6096|CaO19.5961|NAS6|CaO19.13382|IPF56	ORF|Uncharacterized	Ca21chr3_C_albicans_SC5314	1060429	1059680	C	CAL0003397	Protein of unknown function
3.31	orf19.5962	HGT4	orf19.13383|IPF21175.1|IPF55.1|Contig4-3087_0008|orf6.9075|CA6095|CaO19.5962|CaO19.13383|SNF3	ORF|Verified	Ca21chr3_C_albicans_SC5314	1063075	1060829	C	CAL0003398	Glucose and galactose sensor; fermentation, filamentation, virulence roles; 20-member glucose transporter family; extended C terminus; high-glucose repressed; macrophage induced; flow model biofilm repressed; Spider biofilm induced
3.31	orf19.5963		orf19.13384|IPF21231.1|IPF53.2|Contig4-3087_0005|Contig4-3087_0007|orf6.9074|CA6094|IPF53|CaO19.5963|CaO19.13384	ORF|Uncharacterized	Ca21chr3_C_albicans_SC5314	1064248	1065297	W	CAL0003399	Putative prenyltransferase; essential gene in S. cerevisiae; Spider biofilm induced
3.31	orf19.5964	ARF2	orf19.13385|IPF21268.1|IPF50.2|Contig4-3087_0003|orf6.9073|CA6093|ARF22|CaO19.5964|CaO19.13385	ORF|Verified	Ca21chr3_C_albicans_SC5314	1066235	1066780	W	CAL0003401	Putative ADP-ribosylation factor; mutation confers hypersensitivity to Brefeldin A; Spider biofilm repressed
3.31	orf19.5964.2	RPL35	IPF21319.1|IPF47.1|Contig4-3087_0001|CA6092|RPL35.3	ORF|Uncharacterized	Ca21chr3_C_albicans_SC5314	1067946	1068748	W	CAF0007060	Ribosomal protein; downregulation correlates with clinical development of fluconazole resistance; colony morphology-related gene regulation by Ssn6; Hap43-induced; Spider biofilm repressed
3.31	orf19.5965		orf19.13386|IPF21338.1|IPF46.2|Contig4-3042_0001|Contig4-3042_0002|Contig4-3042_0003|orf6.9072|CA6091|CaO19.13386|UFD2|CaO19.5965	ORF|Uncharacterized	Ca21chr3_C_albicans_SC5314	1072234	1069007	C	CAL0003403	Protein of unknown function
3.31	orf19.5966		orf19.13387|IPF21294.1|IPF27869.1|orf6.9071|CaO19.5966|CaO19.13387	ORF|Dubious	Ca21chr3_C_albicans_SC5314	1072430	1072771	W	CAL0003405	Protein of unknown function
3.31	orf19.5967	FGR44	orf19.13388|IPF21226.1|IPF44.1|Contig4-3042_0010|orf6.9070|CA6090|CaO19.5967|IPF44|CaO19.13388	ORF|Verified	Ca21chr3_C_albicans_SC5314	1073190	1074422	W	CAL0003407	Protein lacking an ortholog in S. cerevisiae; transposon mutation affects filamentous growth
3.31	orf19.5968	RDI1	orf19.13389|IPF21259.1|IPF40.1|Contig4-3042_0013|orf6.9069|CA6089|CaO19.5968|CaO19.13389	ORF|Verified	Ca21chr3_C_albicans_SC5314	1075120	1075731	W	CAL0003409	Putative rho GDP dissociation inhibitor; transposon mutation affects filamentous growth; farnesol, filament-induced; regulated by Nrg1, Tup1; protein levels low in stationary phase yeast
3.31	orf19.5970		CaO19.13391|orf19.13391|IPF21158.1|IPF37.1|HPR5|Contig4-3042_0014|Contig4-3042_0015|orf6.9067|CA6088|CaO19.5970	ORF|Uncharacterized	Ca21chr3_C_albicans_SC5314	1078751	1076163	C	CAL0003422	Putative DNA repair helicase; transcriptionally induced by interaction with macrophage; fungal-specific (no human or murine homolog)
3.31	orf19.5971		orf19.13392|IPF21189.1|IPF36.1|Contig4-3042_0016|orf6.9066|CA6087|CaO19.5971|CaO19.13392|YHV1	ORF|Uncharacterized	Ca21chr3_C_albicans_SC5314	1078990	1080834	W	CAL0003423	Protein of unknown function
3.31	orf19.5973	PHB2	orf19.13394|IPF21245.1|IPF33.1|Contig4-3042_0017|orf6.9064|CA6086|CaO19.13394|CaO19.5973	ORF|Verified	Ca21chr3_C_albicans_SC5314	1081109	1082020	W	CAL0003424	Prohibitin 2; plasma membrane localized
3.31	orf19.5974	ATG9	orf19.13395|IPF21152.1|IPF32.2|Contig4-3042_0018|orf6.9063|CA6085|CaO19.13395|IPF32|CaO19.5974	ORF|Verified	Ca21chr3_C_albicans_SC5314	1085081	1082223	C	CAL0003426	Protein similar to S. cerevisiae Atg9; required for early step in autophagy; required for cytoplasm to vacuole trafficking of Lap41; Spider biofilm induced
3.31	orf19.5975	TRY4	CaO19.5975|orf19.13396|IPF21248.1|IPF29.1|Contig4-3042_0024|orf6.9062|CA6084|IPF29|CaO19.13396	ORF|Verified	Ca21chr3_C_albicans_SC5314	1087655	1088515	W	CAL0003428	C2H2 transcription factor; fluconazole-repressed; induced in ssr1 mutant; required for yeast cell adherence to silicone substrate; Spider biofilm induced
3.31	orf19.5976		orf19.13397|IPF21218.1|IPF26.1|IPF26|Contig4-3042_0027|orf6.9061|CA6083|CaO19.5976|CaO19.13397	ORF|Uncharacterized	Ca21chr3_C_albicans_SC5314	1090003	1091343	W	CAL0003430	Protein of unknown function; ortholog of S. cerevisiae Urn1; downregulated by fluphenazine treatment, in azole-resistant strains that overexpress CDR1 and CDR2 or MDR1
3.31	orf19.5977	CEM1	orf19.13398|IPF21215.1|IPF25.1|Contig4-3042_0029|orf6.9060|CA6082|CaO19.5977|CaO19.13398	ORF|Uncharacterized	Ca21chr3_C_albicans_SC5314	1091392	1092717	W	CAL0003432	Protein similar to S. cerevisiae Cem1p, an acyl carrier protein involved in fatty acid biosynthesis; likely to be essential for growth, based on an insertional mutagenesis strategy
3.31	orf19.5978		orf19.13399|IPF21217.1|IPF24.1|Contig4-3042_0030|Contig4-3042_0031|orf6.9059|CA6081|IPF24|FZD6|CaO19.13399|CaO19.5978	ORF|Uncharacterized	Ca21chr3_C_albicans_SC5314	1093296	1094510	W	CAL0003435	Protein of unknown function
3.31	orf19.5980		orf19.13401|IPF21196.1|IPF21.1|Contig4-3042_0033|orf6.9057|CA6080|IPF21|CaO19.5980|CaO19.13401	ORF|Uncharacterized	Ca21chr3_C_albicans_SC5314	1096283	1094553	C	CAL0003448	Protein of unknown function; Hap43-repressed gene
3.31	orf19.5982	RPL18	orf19.5981.1|orf19.13403|IPF21165.1|IPF21278.1|IPF18.1|IPF20.1|Contig4-3042_0035|orf6.9055|RPL18B|CA6079|RPL18.exon2	ORF|Uncharacterized	Ca21chr3_C_albicans_SC5314	1097682	1096663	C	CAL0003449	Predicted ribosomal protein; Plc1p-regulated, Tbf1-activated; repressed upon phagocytosis by murine macrophage; Hap43p-induced; Spider biofilm repressed
3.31	orf19.5984		CaO19.13405|orf19.13405|IPF21238.1|IPF16.1|Contig4-2427_0007|orf6.9053|CA6077|IPF16|CaO19.5984	ORF|Verified	Ca21chr3_C_albicans_SC5314	1098032	1099033	W	CAL0003451	Putative protein of unknown function; homozygous transposon insertion causes decreased colony wrinkling under filamentous growth-inducing conditions, but does not block true hyphal formation in liquid media
3.31	orf19.5985		orf19.13406|IPF21271.1|IPF15.1|Contig4-2427_0006|orf6.9052|CA6076|PAC10|PAC10.3	ORF|Uncharacterized	Ca21chr3_C_albicans_SC5314	1099723	1099112	C	CAL0003453	Protein of unknown function
3.31	orf19.5986	THI4	orf19.13407|IPF21233.1|IPF14.1|Contig4-2427_0005|orf6.9051|CA6075|CaO19.13407|CaO19.5986	ORF|Uncharacterized	Ca21chr3_C_albicans_SC5314	1101008	1099944	C	CAL0003455	Thiamine biosynthetic enzyme precursor; repressed during the mating process; stationary phase enriched protein; Spider biofilm induced
3.31	orf19.5987		orf19.13408|IPF21213.1|IPF11.1|Contig4-2427_0004|orf6.9050|CA6074|CaO19.13408|CaO19.5987|IPF11	ORF|Uncharacterized	Ca21chr3_C_albicans_SC5314	1102832	1101414	C	CAL0003457	Protein of unknown function
3.31	orf19.5989		orf19.13410|IPF21211.1|IPF9.2|Contig4-2512_0006|orf6.9048|CA6073|HRP1|CaO19.13410|CaO19.5989	ORF|Uncharacterized	Ca21chr3_C_albicans_SC5314	1103543	1104970	W	CAL0003460	Putative cleavage factor I subunit; required for the cleavage and polyadenylation of pre-mRNA 3' ends; Spider biofilm repressed
3.31	orf19.5991		orf19.13412|IPF21153.1|IPF6.1|Contig4-2512_0001|orf6.9046|CA6072|DBP10|CaO19.5991|CaO19.13412	ORF|Uncharacterized	Ca21chr3_C_albicans_SC5314	1107791	1105065	C	CAL0003464	Protein of unknown function
3.31	orf19.5992	WOR2	CaO19.13413|ZCF33|orf19.13413|IPF21214.1|IPF4835.1|Contig4-2837_0008|orf6.9045|CA6071|IPF4835|CaO19.5992	ORF|Verified	Ca21chr3_C_albicans_SC5314	1118833	1120173	W	CAL0003465	Zn(II)2Cys6 transcription factor; regulator of white-opaque switching; required for maintenance of opaque state; Hap43-induced
3.31	orf19.5994	RHB1	orf19.13415|IPF21266.1|IPF4842.1|Contig4-2771_0004|orf6.9043|CA6070|IPF4842|CaO19.5994|CaO19.13415	ORF|Verified	Ca21chr3_C_albicans_SC5314	1126576	1127130	W	CAL0003468	Putative small G protein from the Ras superfamily involved in cell wall integrity and control of filamentous growth under nitrogen starvation
3.31	orf19.5995	MCA1	CaO19.5995|orf19.13416|IPF21216.1|IPF4847.1|Contig4-2771_0005|orf6.9042|CA6069|CaO19.13416|IPF4847	ORF|Verified	Ca21chr3_C_albicans_SC5314	1128917	1127571	C	CAL0003470	Putative cysteine protease with similarity to S. cerevisiae Mca1p; has a role in apoptotic cell death upon H2O2 treatment; fungal-specific (no human or murine homolog); farnesol-induced
3.31	orf19.5996.1	RPS19A	IPF21287.1|IPF4849.1|Contig4-2771_0008|CA6068|RPS19A.3	ORF|Uncharacterized	Ca21chr3_C_albicans_SC5314	1130360	1131164	W	CAF0007061	Putative ribosomal protein S19; protein level decreases in stationary phase cultures; Spider biofilm repressed
3.31	orf19.5999	DYN1	CaO19.13420|orf19.13420|IPF21224.1|IPF19819.1|Contig4-2771_0009|orf6.9038|CA6067|CaO19.5999	ORF|Verified	Ca21chr3_C_albicans_SC5314	1143879	1131394	C	CAL0003475	Dynein heavy chain; motor protein that moves to microtubule minus end; required for yeast cell separation, spindle positioning, nuclear migration, hyphal growth; regulated by Mig1, Hap43; flow model and rat catheter biofilm repressed
3.31	orf19.6000	CDR1	CaO19.6000|orf19.13421|IPF21285.1|IPF9739.2|Contig4-1997_0005|CA6066|CaO19.13421|orf6.9037	ORF|Verified	Ca21chr3_C_albicans_SC5314	1146153	1150658	W	CAL0005016	Multidrug transporter of ABC superfamily; transports phospholipids in an in-to-out direction; induced by beta-estradiol, progesterone, corticosteroid, or cholesterol; Spider biofilm induced
3.03333	orf19.6001	SAP3	orf19.13422|IPF21229.1|IPF8313.1|Contig4-1997_0001|orf6.9036|CA6065|CaO19.6001|CaO19.13422	ORF|Verified	Ca21chr3_C_albicans_SC5314	1151759	1152955	W	CAL0005017	Secreted aspartyl proteinase, acts in utilization of protein as nitrogen source; assessment of virulence role complicated by URA3 effects; regulated by growth phase; produced by opaque phase cells; alpha-pheromone repressed
3.03333	orf19.6002	RPL8B	orf19.13423|IPF21253.1|IPF8312.2|Contig4-1997_0002|orf6.9035|CA6064|RPL81|RPL8B-1|CaO19.6002|CaO19.13423	ORF|Uncharacterized	Ca21chr3_C_albicans_SC5314	1154042	1153254	C	CAL0005018	Predicted ribosomal protein; regulated upon yeast-hypha switch; repressed upon phagocytosis by murine macrophage; Spider biofilm repressed
3.03333	orf19.6003		orf19.13424|IPF21190.1|IPF8311.1|Contig4-1997_0004|Contig4-2656_0014|orf6.9034|CA6063|CaO19.6003|IPF8311|CaO19.13424	ORF|Uncharacterized	Ca21chr3_C_albicans_SC5314	1156316	1154529	C	CAL0005019	Protein of unknown function; role in intracellular signal transduction; Spider biofilm induced
3.03333	sampi-3a		sampi	long_terminal_repeat	Ca21chr3_C_albicans_SC5314	1157986	1158304	W	CAL0121168	Long terminal repeat (LTR); about 324 bp long, 9 copies per genome
3.03333	orf19.6005	HGT5	orf19.13426|IPF21176.1|IPF8307.1|Contig4-2656_0009|orf6.9032|CA6062|CaO19.13426|STL98|IPF8307|CaO19.6005	ORF|Uncharacterized	Ca21chr3_C_albicans_SC5314	1160818	1158584	C	CAL0005021	Putative glucose transporter of the major facilitator superfamily; the C. albicans glucose transporter family comprises 20 members; 12 probable membrane-spanning segments, extended N terminus; expressed in rich medium; Hap43p-repressed
3.03333	orf19.6007		orf19.13428|IPF21227.1|IPF8302.1|Contig4-2656_0006|orf6.9030|CA6061|CaO19.13428|CaO19.6007|IPF8302	ORF|Uncharacterized	Ca21chr3_C_albicans_SC5314	1162680	1161619	C	CAL0005022	Predicted fatty acid acyl transferase-related protein domain; repressed by prostaglandins
3.03333	orf19.6008		CaO19.6008|orf19.13429|IPF21151.1|IPF8301.2|Contig4-2656_0001|orf6.9029|CA6060|IPF8301|CaO19.13429	ORF|Uncharacterized	Ca21chr3_C_albicans_SC5314	1166750	1163925	C	CAL0005023	S. cerevisiae ortholog YLL032C interacts with ribosomes; repressed by alpha pheromone in SpiderM medium
3.03333	orf19.6966		IPF11120.1|Contig4-2580_0006|orf6.7712|CA5014|CaO19.6966|CKI1|IPF11120	ORF|Uncharacterized	Ca21chr3_C_albicans_SC5314	1170277	1168409	C	CAL0000339	Protein of unknown function
3.03333	orf19.6967	USO6	IPF11118.1|Contig4-2580_0004|orf6.7713|CA5015|IPF11118|CaO19.6967	ORF|Uncharacterized	Ca21chr3_C_albicans_SC5314	1171431	1174823	W	CAL0000342	Putative vesicular transport protein; transcript induced by filamentous growth; rat catheter biofilm repressed
3.03333	orf19.6968		IPF7561.2|Contig4-2973_0020|orf6.7714|CA5016|CaO19.6968|IPF7561	ORF|Uncharacterized	Ca21chr3_C_albicans_SC5314	1178346	1181807	W	CAL0000346	Protein of unknown function; Hog1-repressed; Spider biofilm induced
3.03333	orf19.6970		IPF7559|IPF7559.2|Contig4-2973_0019|orf6.7716|CA5017|CaO19.6970	ORF|Uncharacterized	Ca21chr3_C_albicans_SC5314	1182951	1181980	C	CAL0000362	Protein of unknown function
3.03333	orf19.6971	DIE2	IPF7558.1|Contig4-2973_0017|orf6.7717|CA5018|CaO19.6971|IPF7558	ORF|Uncharacterized	Ca21chr3_C_albicans_SC5314	1183347	1184609	W	CAL0000363	Protein of unknown function
3.03333	orf19.6972	SMI1B	SMI1|CaO19.6972|IPF7557.1|Contig4-2973_0016|orf6.7718|CA5019|IPF7557	ORF|Uncharacterized	Ca21chr3_C_albicans_SC5314	1186365	1184713	C	CAL0000365	Putative cell wall assembly regulatory protein; Rim101-repressed; possibly an essential gene, disruptants not obtained by UAU1 method
3.03333	orf19.6973		IPF7556.1|Contig4-2973_0015|orf6.7719|CA5020|LON1|CaO19.6973|IPF7556	ORF|Uncharacterized	Ca21chr3_C_albicans_SC5314	1190746	1186970	C	CAL0000366	ATP-dependent LON protease family member; Hap43-repressed gene; regulated by Gcn2 and Gcn4; Spider biofilm induced
3.03333	orf19.6975	YST1	orf19.6975.1|IPF7549.1|Contig4-2973_0009|orf6.7721|CA5022|RPS0A|CA5021|YST1.exon2	ORF|Verified	Ca21chr3_C_albicans_SC5314	1194311	1193135	C	CAL0000370	Ribosome-associated protein; antigenic in mice; complements S. cerevisiae yst1 yst2 mutant; similar to laminin receptor; predicted S/T phosphorylation, N-glycosylation, myristoylation, Hap43-, Gcn4-regulated; Spider biofilm repressed
3.03333	orf19.6976		IPF7547.2|Contig4-2973_0006|orf6.7722|CA5023|CaO19.6976|IPF7547	ORF|Uncharacterized	Ca21chr3_C_albicans_SC5314	1195444	1197285	W	CAL0000371	Predicted MFS membrane transporter; member of the proton coupled folate transporter/heme carrier protein family; virulence-group-correlated expression; Spider biofilm induced
3.03333	orf19.6977	GPI1	IPF3009.2|orf6.7723|CA5024|CaO19.6977|IPF3009	ORF|Uncharacterized	Ca21chr3_C_albicans_SC5314	1199304	1197358	C	CAL0000374	Putative protein of GPI synthesis; expression is reduced in a fluconazole-resistant isolate
3.03333	orf19.6978		IPF3008.1|Contig4-2646_0001|orf6.7724|CaO19.6978	ORF|Uncharacterized	Ca21chr3_C_albicans_SC5314	1199593	1199264	C	CAL0000377	Planktonic growth-induced gene
3.03333	orf19.6979		IPF3003.1|Contig4-2646_0008|Contig4-2646_0009|orf6.7725|CA5025|CaO19.6979|AMI3	ORF|Uncharacterized	Ca21chr3_C_albicans_SC5314	1201851	1204193	W	CAL0000380	Protein of unknown function
3.03333	orf19.6980		IPF3001.1|Contig4-2646_0012|orf6.7726|CA5026|CaO19.6980|IPF3001	ORF|Uncharacterized	Ca21chr3_C_albicans_SC5314	1205809	1207566	W	CAL0000391	Protein of unknown function
3.03333	orf19.6981		IPF2999.2|Contig4-2646_0013|orf6.7727|CA5027|CaO19.6981|IPF2999	ORF|Uncharacterized	Ca21chr3_C_albicans_SC5314	1207891	1209678	W	CAL0000392	Protein of unknown function
3.03333	orf19.6982		IPF2998.1|Contig4-2116_0001|Contig4-2646_0014|orf6.7728|CA5028|IPF2998|CaO19.6982	ORF|Uncharacterized	Ca21chr3_C_albicans_SC5314	1211103	1209814	C	CAL0000393	Protein of unknown function
3.03333	orf19.6983		IPF2997.1|Contig4-2787_0006|orf6.7729|CA5029|IPF2997|CaO19.6983	ORF|Uncharacterized	Ca21chr3_C_albicans_SC5314	1217360	1216188	C	CAL0000394	Protein of unknown function; Hap43-repressed gene; repressed by nitric oxide; Spider biofilm induced
3.03333	orf19.6984		IPF2988.1|Contig4-2884_0009|Contig4-2884_0010|orf6.7730|CA5030|IPF2988|CaO19.6984|AVT42	ORF|Uncharacterized	Ca21chr3_C_albicans_SC5314	1226768	1229056	W	CAL0000396	Protein of unknown function
3.03333	orf19.6985	TEA1	IPF20023.1|Contig4-2884_0008|orf6.7731|CA5031|IPF20023|CaO19.6985	ORF|Verified	Ca21chr3_C_albicans_SC5314	1229452	1232154	W	CAL0000398	Putative transcription factor with zinc cluster DNA-binding motif; has similarity to S. cerevisiae Tea1p; Hap43p-repressed gene
3.03333	tV(AAC)5	tV(AAC)5		tRNA|Uncharacterized	Ca21chr3_C_albicans_SC5314	1232673	1232600	C	CAF0007250	tRNA-Val, predicted by tRNAscan-SE; AAC anticodon
3.03333	tV(AAC)6	tV(AAC)6		tRNA|Uncharacterized	Ca21chr3_C_albicans_SC5314	1232762	1232689	C	CAF0007251	tRNA-Val, predicted by tRNAscan-SE; AAC anticodon
3.03333	SNRNAU6	SNR6		snRNA|Uncharacterized	Ca21chr3_C_albicans_SC5314	1233630	1233727	W	CAF0007404	Highly conserved U6 small nuclear RNA involved in splicing; ortholog of S. cerevisiae SNR6; gene transcribed by RNA Pol III
3.03333	orf19.6986		IPF2982.1|Contig4-2884_0003|Contig4-2884_0004|orf6.7732|CA5032|IPF2982|MSB3|CaO19.6986	ORF|Uncharacterized	Ca21chr3_C_albicans_SC5314	1234025	1236232	W	CAL0000400	Protein of unknown function
3.03333	orf19.6987	DNM1	IPF2980.1|Contig4-2884_0002|orf6.7733|CA5033|CaO19.6987	ORF|Uncharacterized	Ca21chr3_C_albicans_SC5314	1239019	1236419	C	CAL0000402	Putative dynamin-related GTPase; transcript upregulated inbRHE model of oral candidiasis; transcript regulated by Nrg1, Mig1, and Tup1
3.03333	orf19.6988	OST1	IPF4532.2|Contig4-2640_0001|Contig4-2640_0016|orf6.7734|CA5034|CaO19.6988	ORF|Verified	Ca21chr3_C_albicans_SC5314	1240149	1241561	W	CAL0000404	Alpha subunit of the oligosaccharyltransferase complex of the ER lumen; catalyzes asparagine-linked glycosylation of newly synthesized proteins; Spider biofilm repressed
3.03333	orf19.6989		IPF4531.1|Contig4-2640_0002|orf6.7735|CA5035|CSP14|CaO19.6989|IPF4531	ORF|Uncharacterized	Ca21chr3_C_albicans_SC5314	1241877	1241554	C	CAL0000405	Putative U2 snRNP-associated protein; Spider biofilm induced
3.03333	orf19.6990		IPF4530.1|Contig4-2640_0003|orf6.7736|CA5036|CYP52|CaO19.6990|CPR52|CYP4	ORF|Uncharacterized	Ca21chr3_C_albicans_SC5314	1242794	1242003	C	CAL0000410	Putative peptidyl-prolyl cis-trans isomerase; predicted endoplasmic reticulum (ER) localization
3.03333	orf19.6991	PRE3	IPF4529.1|Contig4-2640_0005|orf6.7737|CA5037|CaO19.6991	ORF|Uncharacterized	Ca21chr3_C_albicans_SC5314	1243214	1243858	W	CAL0000411	Putative beta-1 proteasome subunit; macrophage-induced protein; regulated by Gcn2p and Gcn4p; GlcNAc-induced protein
3.03333	orf19.6992	QDR2	IPF4526.1|Contig4-2640_0010|orf6.7738|CA5038|CaO19.6992	ORF|Verified	Ca21chr3_C_albicans_SC5314	1245133	1246647	W	CAL0000412	Predicted MFS membrane transporter, member of the drug:proton antiporter (12 spanner) (DHA1) family; Spider biofilm induced
3.03333	orf19.6993	GAP2	orf6.7739|IPF4523.2|Contig4-2640_0013|CA5039|GAP13|CaO19.6993	ORF|Verified	Ca21chr3_C_albicans_SC5314	1248654	1246888	C	CAL0000413	General amino acid permease; ketoconazole, flucytosine repressed; Ssy1-dependent histidine induction; regulated by Nrg1, Tup1; colony morphology-related gene regulation by Ssn6; Spider and flow model biofilm induced
3.03333	orf19.6994	BAT22	IPF4517.1|Contig4-2640_0015|orf6.7740|CA5040|CaO19.6994|BAT1	ORF|Uncharacterized	Ca21chr3_C_albicans_SC5314	1251796	1250687	C	CAL0000414	Putative branched chain amino acid aminotransferase; regulated by Gcn4p; induced by farnesol treatment, GlcNAc, amino acid starvation (3-aminotriazole treatment); present in exponential and stationary growth phase yeast cultures
3.03333	orf19.6995	ATO6	IPF4516.1|Contig4-2915_0020|orf6.7741|CA5041|AFF4|CaO19.6995|FRP7	ORF|Uncharacterized	Ca21chr3_C_albicans_SC5314	1253105	1253950	W	CAL0000416	Putative fungal-specific transmembrane protein
3.03333	orf19.6996	MNN14	IPF4514.1|Contig4-2915_0017|orf6.7742|CA5042|CaO19.6996|IPF4514	ORF|Uncharacterized	Ca21chr3_C_albicans_SC5314	1254649	1256706	W	CAL0000417	Predicted alpha-1,3-mannosyltransferase activity with a role in protein glycosylation; Hap43-repressed; Spider biofilm induced
3.03333	orf19.6997	ATO5	IPF4513.1|Contig4-2915_0016|orf6.7743|CA5043|AFF5|CaO19.6997|FRP4	ORF|Verified	Ca21chr3_C_albicans_SC5314	1257416	1258258	W	CAL0000419	Putative fungal-specific transmembrane protein
3.03333	orf19.6998	GTT1	GTT2|IPF4511.1|Contig4-2915_0014|orf6.7744|CA5044|CaO19.6998|GTT14	ORF|Uncharacterized	Ca21chr3_C_albicans_SC5314	1259055	1259858	W	CAL0000420	Putative glutathione S-transferase; downregulated upon adherence to polystyrene; regulated upon white-opaque switching; induced in the presence of human neutrophils; oxidative stress-induced via Cap1p; regulated by Gcn2p, Gcn4p
3.03333	orf19.6999		IPF4510.1|Contig4-2915_0013|orf6.7745|CA5045|CaO19.6999|TCD5|IPF4510	ORF|Uncharacterized	Ca21chr3_C_albicans_SC5314	1260329	1261606	W	CAL0000423	Predicted oxidoreductase; rat catheter biofilm repressed
3.03333	orf19.7001	YCK2	IPF4506.1|Contig4-2915_0003|Contig4-2915_0005|orf6.7747|CA5046|CaO19.7001|YCK21	ORF|Verified	Ca21chr3_C_albicans_SC5314	1263828	1265315	W	CAL0001885	Plasma membrane protein similar to S. cerevisiae casein kinase I, Yck2p; null mutant has defect in damaging oral epithelial cells and in hyphal branching; transcription is activated in weak acid stress or on contact with host cells
3.03333	orf19.7002		IPF4504.1|Contig4-2915_0001|orf6.7748|CA5047|IPF4504|CaO19.7002	ORF|Uncharacterized	Ca21chr3_C_albicans_SC5314	1267346	1266159	C	CAL0001886	Protein of unknown function
3.03333	orf19.7347		IPF7116.1|Contig4-2885_0019|orf6.8507|CA5648|CaO19.7347|UBC6	ORF|Uncharacterized	Ca21chr3_C_albicans_SC5314	1269896	1270627	W	CAL0004643	Protein of unknown function
3.03333	orf19.7348		IPF27310.1|Contig4-2885_0020|orf6.8508|CaO19.7348	ORF|Dubious	Ca21chr3_C_albicans_SC5314	1269897	1269577	C	CAL0004645	Protein of unknown function
3.03333	koppa-3a		koppa	long_terminal_repeat	Ca21chr3_C_albicans_SC5314	1273232	1273025	C	CAL0121169	Long terminal repeat (LTR); about 208 bp long, 10 copies per genome
3.03333	orf19.7349	CHS4	CaO19.7349|SKT5|CSD4|CAL2|IPF7112.1|Contig4-2885_0008|Contig4-2885_0010|orf6.8509|CA5649	ORF|Verified	Ca21chr3_C_albicans_SC5314	1275141	1277396	W	CAL0004647	Activator of Chs3p chitin synthase; required for wild-type wall chitin content, but not for hyphal growth; mutant resistant to Calcofluor white; prenylation and 2 transmembrane segments predicted; functional homolog of S. cerevisiae Chs4p
3.03333	orf19.7350	RCT1	IPF7109.2|Contig4-2885_0005|orf6.8510|CA5650|CaO19.7350|IPF7109	ORF|Uncharacterized	Ca21chr3_C_albicans_SC5314	1279189	1279764	W	CAL0004665	Fluconazole-induced protein; Ras1, Cyr1 repressed and Efg1 induced; regulated by Nrg1, Tup1, Tbf1, Ssn6; induced in oralpharyngeal candidasis; rat catheter biofilm repressed
3.03333	orf19.7353		IPF7105.2|Contig4-2885_0001|orf6.8513|CA5651|KIP3|CaO19.7353	ORF|Uncharacterized	Ca21chr3_C_albicans_SC5314	1282917	1279999	C	CAL0004669	Protein of unknown function
3.03333	orf19.7354	LAC1	IPF19815.1|Contig4-2885_0022|orf6.8514|CA5652|CaO19.7354|IPF19815	ORF|Verified	Ca21chr3_C_albicans_SC5314	1284965	1283682	C	CAL0004672	Ceramide synthase; required for biosynthesis of ceramides with C18:0 fatty acids, which serve as precursors for glucosylsphingolipids; caspofungin induced
3.03333	orf19.7355	SSN8	IPF15544.1|Contig4-2029_0005|orf6.8515|CA5653|CaO19.7355|CYCC	ORF|Verified	Ca21chr3_C_albicans_SC5314	1287826	1286522	C	CAL0004675	Ortholog of S. cerevisiae Ssn8; a component of RNA polymerase II holoenzyme; mutants are viable and are sensitive to hydrogen peroxide medium
3.03333	orf19.7356		IPF15543.2|Contig4-2029_0008|orf6.8516|CA5654|IPF15543|CaO19.7356	ORF|Uncharacterized	Ca21chr3_C_albicans_SC5314	1288552	1288220	C	CAL0004677	Protein of unknown function
3.03333	orf19.7357		IPF18080.1|orf6.8517|CA5655|CaO19.7357|IPF18080.3f|IPF18080	ORF|Uncharacterized	Ca21chr3_C_albicans_SC5314	1289707	1290753	W	CAL0004679	Protein of unknown function
3.03333	orf19.7358	SAM50	IPF14683.2|Contig4-2195_0001|orf6.8518|CA5656|IPF14683|CaO19.7358	ORF|Verified	Ca21chr3_C_albicans_SC5314	1292372	1290849	C	CAL0004681	Predicted component of the SAM complex involved in mitochondrial protein import
3.03333	orf19.7359	CRZ1	IPF14682.2|Contig4-2195_0002|orf6.8519|CA5657|CaO19.7359|IPF14682	ORF|Verified	Ca21chr3_C_albicans_SC5314	1295013	1292818	C	CAL0004683	Calcineurin-regulated C2H2 transcription factor; role in maintenance of membrane integrity, azole tolerance; not required for mouse virulence; repressed by low iron; regulates Ca++ influx during alkaline pH response; Spider biofilm induced
3.03333	orf19.7360		IPF1242.2|Contig4-2926_0026|orf6.8520|CA5658|IPF1242|CaO19.7360	ORF|Uncharacterized	Ca21chr3_C_albicans_SC5314	1298648	1298172	C	CAL0004703	Protein of unknown function
3.03333	orf19.7361		IPF1243.1|Contig4-2926_0024|orf6.8521|CA5659|SEN54|CaO19.7361	ORF|Uncharacterized	Ca21chr3_C_albicans_SC5314	1298893	1300311	W	CAL0004706	Protein of unknown function
5.81111	orf19.7362	SKN1	orf6.8522|IPF1245.1|Contig4-2926_0022|Contig4-2926_0023|CA5660|SKN1.3|SKN1.3f	ORF|Uncharacterized	Ca21chr3_C_albicans_SC5314	1302586	1300373	C	CAL0004709	Protein with a role in beta-1,6-glucan synthesis; probable N-glycosylated type II membrane protein; transcript and mRNA length change induced by yeast-hypha transition; induced by Rim101, caspofungin; rat catheter and Spider biofilm induced
5.81111	snR44d			snoRNA|Uncharacterized	Ca21chr3_C_albicans_SC5314	1305827	1305932	W	CAL0126344	H/ACA box small nucleolar RNA (snoRNA)
5.81111	orf19.7363	KRE6	IPF1249.2|Contig4-2926_0012|orf6.8523|CA5661|CaO19.7363	ORF|Verified	Ca21chr3_C_albicans_SC5314	1306201	1308423	W	CAL0004712	Essential beta-1,6-glucan synthase subunit; change in mRNA length, not abundance, at yeast-hypha transition; alkaline induced by Rim101, on cell wall regeneration; Spider biofilm induced; Bcr1-repressed in RPMI a/a biofilms
9	orf19.7364		IPF1250.2|Contig4-2926_0007|orf6.8524|CA5662|IPF1250|CaO19.7364	ORF|Uncharacterized	Ca21chr3_C_albicans_SC5314	1309949	1311559	W	CAL0004715	Protein of unknown function
9	orf19.7365		IPF1251.1|Contig4-2926_0004|orf6.8525|CA5663|FYV10|CaO19.7365|IPF1251	ORF|Uncharacterized	Ca21chr3_C_albicans_SC5314	1312259	1313977	W	CAL0004719	Protein of unknown function
9	orf19.7366		IPF1252.1|Contig4-2926_0003|orf6.8526|CA5664|CaO19.7366|IPF1252	ORF|Uncharacterized	Ca21chr3_C_albicans_SC5314	1315064	1314003	C	CAL0004722	Protein of unknown function
9	orf19.7367	UBP1	IPF1255.1|Contig4-2926_0029|orf6.8527|CA5665|CaO19.7367	ORF|Uncharacterized	Ca21chr3_C_albicans_SC5314	1317812	1315398	C	CAL0004724	Protein of unknown function
9	orf19.7368		IPF1257.1|Contig4-3075_0021|orf6.8528|CA5666|CaO19.7368|PUB1	ORF|Uncharacterized	Ca21chr3_C_albicans_SC5314	1320481	1318949	C	CAL0004726	Protein of unknown function
9	orf19.7369	TRM12	IPF1259.1|Contig4-3093_0001|orf6.8529|CA5667|IPF1259|CaO19.7369	ORF|Uncharacterized	Ca21chr3_C_albicans_SC5314	1321965	1323224	W	CAL0004728	Protein of unknown function
9	orf19.7370		IPF1261.1|Contig4-3093_0003|orf6.8530|CA5668|IPF1261|CaO19.7370	ORF|Uncharacterized	Ca21chr3_C_albicans_SC5314	1323800	1324795	W	CAL0004748	Possible G-protein coupled receptor; vacuolar membrane transporter for cationic amino acids; PQ-loop motif; rat catheter and Spider biofilm induced
9	orf19.7371	ZCF35	IPF1264.2|Contig4-3093_0006|orf6.8531|CA5669|CaO19.7371|IPF1264	ORF|Uncharacterized	Ca21chr3_C_albicans_SC5314	1325561	1328869	W	CAL0004750	Zn(II)2Cys6 transcription factor; Hap43-induced; Spider biofilm induced
9	orf19.7372	MRR1	IPF1266.1|Contig4-3093_0008|orf6.8532|CA5670|HAP1|CaO19.7372|ZCF36|IPF1266	ORF|Verified	Ca21chr3_C_albicans_SC5314	1329371	1332697	W	CAL0004753	Putative Zn(II)2Cys6 transcription factor; regulator of MDR1 transcription; gain-of-function mutations cause upregulation of MDR1 (a plasma membrane multidrug efflux pump) and multidrug resistance; Hap43-induced
9	orf19.7374	CTA4	IPF1269.1|Contig4-3093_0011|orf6.8534|CA5671|CaO19.7374	ORF|Verified	Ca21chr3_C_albicans_SC5314	1333933	1336983	W	CAL0004760	Zn(II)2Cys6 transcription factor; induced by nitric oxide; induced by Mnl1 under weak acid stress; repressed upon adherence to polystyrene; Hap43-repressed; Spider biofilm induced
9	orf19.7375		IPF1271.1|Contig4-3093_0012|orf6.8535|CA5672|IPF1271|CaO19.7375|USA1|U1A	ORF|Uncharacterized	Ca21chr3_C_albicans_SC5314	1337711	1337097	C	CAL0004764	Putative U1A component of the U1 snRNP, involved in splicing; contains two RNA recognition motifs (RRMs); ortholog of S. cerevisiae MUD1
9	orf19.7376		IPF1272.1|Contig4-3093_0013|orf6.8536|CA5673|IPF1272|CaO19.7376	ORF|Uncharacterized	Ca21chr3_C_albicans_SC5314	1337894	1340182	W	CAL0004767	Protein of unknown function
9	orf19.7377	ASE1	CaO19.7377|IPF1274.2|Contig4-3093_0015|Contig4-3093_0018|orf6.8537|CA5674|IPF1274	ORF|Uncharacterized	Ca21chr3_C_albicans_SC5314	1340550	1343270	W	CAL0004769	Putative microtubule-associated protein; member of conserved Mcm1p regulon; periodic mRNA expression, peak at cell-cycle G2/M phase
9	orf19.7378		IPF1276.1|Contig4-3093_0019|orf6.8538|CA5675|SIS2|CaO19.7378	ORF|Uncharacterized	Ca21chr3_C_albicans_SC5314	1345056	1343440	C	CAL0004771	Protein of unknown function
9	orf19.7379	FAA2	IPF1278.1|Contig4-3093_0023|orf6.8539|CA5676|FAA2-4|FAA22|CaO19.7379|FAA24	ORF|Uncharacterized	Ca21chr3_C_albicans_SC5314	1347975	1345711	C	CAL0004773	Putative acyl CoA synthetase; expression regulated upon white-opaque switch; rat catheter biofilm induced; Spider biofilm induced
9	orf19.7380		IPF1286.1|Contig4-3093_0029|orf6.8540|CA5677|IPF1286	ORF|Uncharacterized	Ca21chr3_C_albicans_SC5314	1352462	1349946	C	CAL0004791	Protein of unknown function
9	orf19.7381	AHR1	IPF1292|IPF1292.1|Contig4-3093_0048|orf6.8541|CA5678|CaO19.7381|ZCF37	ORF|Verified	Ca21chr3_C_albicans_SC5314	1362620	1364494	W	CAL0004794	Zn(II)2Cys6 transcription factor; involved in regulation of adhesion genes; involved in white-opaque switch; forms complex with Mcm1; mutant is sensetive to 5-fluorocytosine and lithium chloride; Spider biofilm induced
9	orf19.7382	CAM1	IPF1299.1|IPF1296.1|Contig4-3093_0051|orf6.8542|orf19.7381.3|CA5679|CA5680|CAM1.exon2	ORF|Uncharacterized	Ca21chr3_C_albicans_SC5314	1366732	1368199	W	CAL0004797	Putative translation elongation factor eEF1 gamma; protein level decreased in stationary phase cultures; Spider biofilm repressed
9	orf19.7383	MNN9	IPF1301.1|Contig4-3093_0053|Contig4-3093_0054|orf6.8543|CA5681|CaO19.7383	ORF|Verified	Ca21chr3_C_albicans_SC5314	1368781	1369887	W	CAL0004800	Protein of N-linked outer-chain mannan biosynthesis; mutant has defective cell wall; required for wild-type hyphal growth; mutant is hygromycin B sensitive and vanadate resistant; has N-terminal membrane-spanning segment (positions 18-34)
9	orf19.7384	NOG1	IPF1302.2|Contig4-3036_0030|orf6.8544|CA5682|CaO19.7384	ORF|Verified	Ca21chr3_C_albicans_SC5314	1370294	1372216	W	CAL0004804	Putative GTPase; mutation confers hypersensitivity to 5-fluorocytosine (5-FC), 5-fluorouracil (5-FU), and tubercidin (7-deazaadenosine); repressed by prostaglandins; Hap43-induced
9	orf19.7385		IPF3333.1|Contig4-3036_0025|orf6.8545|CA5683|CaO19.7385|LEE1|IPF3333	ORF|Uncharacterized	Ca21chr3_C_albicans_SC5314	1373821	1375326	W	CAL0004807	CCCH zinc finger protein; Spider biofilm induced
9	orf19.7386		IPF3331.1|Contig4-3036_0022|orf6.8546|CA5684|MBA1|CaO19.7386|IPF3331	ORF|Uncharacterized	Ca21chr3_C_albicans_SC5314	1376387	1375512	C	CAL0004810	Protein of unknown function
9	orf19.7387	ELP3	IPF3330.1|Contig4-3036_0021|orf6.8547|CA5685|CaO19.7387|HPA1	ORF|Uncharacterized	Ca21chr3_C_albicans_SC5314	1376656	1378299	W	CAL0004812	Predicted histone acetyltransferase; role in regulation of transcription, tRNA wobble uridine modification; Spider biofilm induced
9	orf19.7388	PBS2	CaO19.7388|IPF3329.1|Contig4-3036_0020|orf6.8548|CA5686|IPF3329	ORF|Verified	Ca21chr3_C_albicans_SC5314	1380059	1378422	C	CAL0004814	MAPK kinase (MAPKK); role in osmotic and oxidative stress responses, oxidative stress adaptation; required for stress regulation of Hog1p localization and activity; functional homolog of S. cerevisiae Pbs2p
9	orf19.7389	REV3	IPF3327.2|Contig4-3036_0014|Contig4-3036_0018|orf6.8549|orf6.8550|CA5687|CA5689|orf19.7390|REV3.5F	ORF|Uncharacterized	Ca21chr3_C_albicans_SC5314	1380646	1385538	W	CAL0004816	Protein of unknown function
9	orf19.7391	OCH1	IPF3324.1|Contig4-3036_0012|orf6.8551|CA5690|CaO19.7391	ORF|Verified	Ca21chr3_C_albicans_SC5314	1386772	1385615	C	CAL0004830	Alpha-1,6-mannosyltransferase; initiates N-glycan outer chain branch addition; similar to S. cerevisiae Och1p; required for wild-type virulence in mouse intravenous infection; fungal-specific (no human or murine homolog)
9	orf19.7392	DED1	Contig4-3036_0007|orf6.8552|CA5691|IPF3320.1|CaO19.7392	ORF|Uncharacterized	Ca21chr3_C_albicans_SC5314	1390000	1387982	C	CAL0004832	Predicted ATP-dependent RNA helicase; RNA strand annealing activity; Spider biofilm induced
9	orf19.7393		IPF3316.1|Contig4-3036_0004|Contig4-3036_0005|orf6.8553|CA5692|CaO19.7393|UTR1	ORF|Uncharacterized	Ca21chr3_C_albicans_SC5314	1392923	1391145	C	CAL0004835	Predicted NAD+/NADH kinase; possible role in cellular iron ion homeostasis; Spider biofilm induced
9	orf19.7394	GDA1	IPF3313.1|Contig4-3036_0003|orf6.8554|CA5693|CaO19.7394	ORF|Verified	Ca21chr3_C_albicans_SC5314	1395621	1393822	C	CAL0004837	Golgi membrane GDPase, required for wild-type O-mannosylation, not N-glycosylation; required for wild-type hyphal induction, cell wall, and cell surface charge; not required for HeLa cell adherence; functional homolog of S. cerevisiae Gda1p
9	orf19.7395		IPF27313.1|orf6.8555|CaO19.7395	ORF|Dubious	Ca21chr3_C_albicans_SC5314	1395705	1396022	W	CAL0004840	Protein of unknown function
9	orf19.7396		IPF3311.2|Contig4-2982_0013|orf6.8556|CA5694|IPF3311|CaO19.7396	ORF|Uncharacterized	Ca21chr3_C_albicans_SC5314	1397110	1398315	W	CAL0004843	Protein of unknown function; Spider biofilm induced; Hap43-repressed
6.14444	orf19.7397.1			ORF|Uncharacterized	Ca21chr3_C_albicans_SC5314	1403269	1402484	C	CAL0126163	Predicted ORF identical to NSA2
6.14444	orf19.7397.3			ORF|Uncharacterized	Ca21chr3_C_albicans_SC5314	1405127	1404336	C	CAL0126161	Predicted ORF identical to orf19.7420
6.14444	orf19.7417	TSA1	orf6.8577|IPF2431.1|Contig4-2982_0001|CA5714|TSA1A|IPF2431|CA5697|IPF18076.3f|IPF18076.1|CaO19.7417	ORF|Verified	Ca21chr3_C_albicans_SC5314	1406632	1406042	C	CAL0005458	TSA/alkyl hydroperoxide peroxidase C (AhPC) family protein; similar to thiol-dependent peroxidases of oxidative stress signaling; antigenic; hyphal surface, nucleus; yeast-form nucleus, cytoplasm; biofilm, phagocytosis, peroxide induced
6.14444	orf19.7414	ALS6	IPF2663.2|Contig4-2957_0018|orf6.2110|CA5713|ALS97|CaO19.7414|orf6.8574	ORF|Verified	Ca21chr3_C_albicans_SC5314	1411972	1407872	C	CAL0005457	ALS family protein; expression in S. cerevisiae confers adhesion to gelatin; macrophage-induced gene; N-terminal adhesion domain; ALS family includes cell-surface glycoproteins, some with adhesin function
6.14444	orf19.7413	MMS21	IPF2657.1|Contig4-2957_0012|orf6.8573|CA5712|CaO19.7413|IPF2657	ORF|Uncharacterized	Ca21chr3_C_albicans_SC5314	1416935	1416117	C	CAL0005456	Putative MMS21-SMC5-SMC6 complex component
6.14444	orf19.7412	MUB1	IPF2656.1|Contig4-2957_0011|orf6.8572|CA5711|CaO19.7412	ORF|Uncharacterized	Ca21chr3_C_albicans_SC5314	1419477	1417276	C	CAL0005455	Predicted protein required for ubiquitination; role in meiosis, regulation of cell budding in S. cereviae; Spider biofilm induced
6.14444	orf19.7411	OAC1	IPF2654.1|Contig4-2957_0008|orf6.8571|CA5710|CaO19.7411	ORF|Uncharacterized	Ca21chr3_C_albicans_SC5314	1420988	1419936	C	CAL0005454	Putative mitochondrial inner membrane transporter; rat catheter biofilm induced
6.14444	orf19.7410	CYM1	IPF2653|IPF2653.1|Contig4-2957_0004|orf6.8570|CA5709|CaO19.7410	ORF|Uncharacterized	Ca21chr3_C_albicans_SC5314	1421546	1424650	W	CAL0005453	Putative metalloprotease of the mitochondrial intermembrane space; rat catheter biofilm induced
6.14444	orf19.7409.1		IPF2652.2|CA5708|MRPL39	ORF|Uncharacterized	Ca21chr3_C_albicans_SC5314	1424951	1424739	C	CAF0007122	Protein of unknown function
6.14444	orf19.7409	ERV25	IPF2651.2|Contig4-3029_0001|orf6.8569|CA5707|CaO19.7409	ORF|Verified	Ca21chr3_C_albicans_SC5314	1425325	1425972	W	CAL0005428	Component of COPII-coated vesicles; transcript induced upon filamentous growth; rat catheter biofilm repressed
6.14444	orf19.7406		IPF2649.1|Contig4-3029_0002|orf6.8566|CA5706|SEC20|CaO19.7406|IPF2649	ORF|Uncharacterized	Ca21chr3_C_albicans_SC5314	1428029	1425969	C	CAL0005427	Protein of unknown function
6.14444	orf19.7405		IPF2645.2|Contig4-3029_0003|orf6.8565|CA5705|CaO19.7405|IPF2645	ORF|Uncharacterized	Ca21chr3_C_albicans_SC5314	1429273	1428569	C	CAL0005426	Ortholog of Rad33; involved in nucleotide excision repair in S. cerevisiae; induced by Mnl1 under weak acid stress
6.14444	orf19.7404		IPF2644.2|Contig4-3029_0004|orf6.8564|CA5704|CHA11|CaO19.7404|CHA1	ORF|Uncharacterized	Ca21chr3_C_albicans_SC5314	1429705	1430703	W	CAL0005425	Catabolic L-serine (L-threonine) deaminase;, catalyzes degradation of L-serine and L-threonine; required to use serine or threonine as a sole nitrogen source; Spider biofilm repressed
6.14444	orf19.7403		IPF2643.1|Contig4-3029_0008|orf6.8563|CA5703|CaO19.7403|IPF2463	ORF|Uncharacterized	Ca21chr3_C_albicans_SC5314	1431432	1433687	W	CAL0005424	Protein of unknown function
6.14444	orf19.7402	DOT1	IPF2639.1|Contig4-3029_0012|orf6.8562|CA5702|CaO19.7402|PCH1	ORF|Uncharacterized	Ca21chr3_C_albicans_SC5314	1434292	1438323	W	CAL0005423	Putative modulator of white-opaque switching
6.14444	orf19.7401	ISW2	IPF2633.1|Contig4-3029_0013|CA5701|CaO19.7401|orf6.8561	ORF|Verified	Ca21chr3_C_albicans_SC5314	1441679	1438509	C	CAL0005422	Ortholog of S. cerevisiae Isw2; an ATPase involved in chromatin remodeling; required for chlamydospore formation; Hap43-induced gene; repressed by high-level peroxide stress
6.14444	orf19.7400	ALS7	CaO19.7400|IPF19816.1|Contig4-2957_0018|CA5699|ALS94|ALS95|ALS96|ALS98|orf6.8560	ORF|Verified	Ca21chr3_C_albicans_SC5314	1446611	1451317	W	CAL0005421	ALS family protein; hypermutable contingency gene; growth-regulated, downregulated in biofilm; two variable repeat regions; expression in S. cerevisiae does not confer adhesiveness; ALS family includes adhesins, cell-surface glycoproteins
6.14444	orf19.7398.1	TSA1B	IPF18075.2|CA5698|TSA1|IPF10875.5f	ORF|Verified	Ca21chr3_C_albicans_SC5314	1452471	1453061	W	CAF0007120	Putative peroxidase; orf19.7398.1 is contig-truncated fragment of gene identical to TSA1; Tsa1p and Tsa1Bp role under oxidative/reductive stress, hyphal cell wall formation; in hyphal nucleus, cell wall; yeast-form nucleus, cytoplasm
6.14444	orf19.7419	HNT2	IPF2434.1|Contig4-2982_0003|orf6.8579|CA5715|CaO19.7419	ORF|Uncharacterized	Ca21chr3_C_albicans_SC5314	1453313	1453855	W	CAL0005459	Putative dinucleoside triphosphate hydrolase; induced upon low-level peroxide stress
6.14444	orf19.7420		IPF2436.1|Contig4-2982_0004|orf6.8580|CA5716|CaO19.7420|MED6	ORF|Uncharacterized	Ca21chr3_C_albicans_SC5314	1453974	1454765	W	CAL0005486	Protein of unknown function
6.14444	orf19.7421	CYP5	IPF2438.1|Contig4-2982_0006|orf6.8581|CA5717|CYP51|CaO19.7421|CPR51|CYP3	ORF|Verified	Ca21chr3_C_albicans_SC5314	1455477	1454866	C	CAL0005487	Putative peptidyl-prolyl cis-trans isomerase; macrophage-downregulated protein level; protein level decrease in stationary phase cultures; predicted endoplasmic reticulum (ER) localization
6.14444	orf19.7422		LCP5|CaO19.7422|IPF2440.1|Contig4-2982_0008|orf6.8582|CA5718	ORF|Uncharacterized	Ca21chr3_C_albicans_SC5314	1456909	1455737	C	CAL0005488	Protein of unknown function
6.14444	orf19.7424	NSA2	IPF2441.1|Contig4-2982_0009|Contig4-3080_0023|orf6.8584|CA5719|CaO19.7424|IPF2441	ORF|Uncharacterized	Ca21chr3_C_albicans_SC5314	1457022	1457807	W	CAL0005489	Putative protein constituent of 66S pre-ribosomal particles; Hap43-induced; repressed by prostaglandins
Function:	GOID	GO_term	Cluster frequency	Background frequency	Corrected P-value	False discovery rate	Gene(s) annotated to the term	Directly Annotated GOID List
	140341	phosphatidylethanolamine floppase activity	2 out of 147 genes, 1.4%	2 out of 6473 background genes, 0.0%	0.08657	0.14	CDR2:CDR1	1903875:8144:140341:42910:90556:15244:1901474:5524:166:17111:90554:1903924:15247:8559:16887:42626
	90554	phosphatidylcholine floppase activity	2 out of 147 genes, 1.4%	2 out of 6473 background genes, 0.0%	0.08657	0.07	CDR2:CDR1	1903875:8144:140341:42910:90556:15244:1901474:5524:166:90554:17111:1903924:15247:8559:42626:16887
	90556	phosphatidylserine floppase activity	2 out of 147 genes, 1.4%	2 out of 6473 background genes, 0.0%	0.08657	0.0467	CDR2:CDR1	1903875:8144:140341:42910:90556:15244:1901474:5524:166:90554:17111:1903924:15247:8559:42626:16887

## Sheet: AMS4104
Supplementary file 4: Coding Sequences within Complex CNVs
Isoalte	Chromosome
AMS4104	Chr3
CNV copy number	ORF ID	Standard Name	Alias	Feature Type	Chromosome	Start Position	Stop Position	Strand	Primary CGD ID	Description
7.45	orf19.7362	SKN1	orf6.8522|IPF1245.1|Contig4-2926_0022|Contig4-2926_0023|CA5660|SKN1.3|SKN1.3f	ORF|Uncharacterized	Ca21chr3_C_albicans_SC5314	1302586	1300373	C	CAL0004709	Protein with a role in beta-1,6-glucan synthesis; probable N-glycosylated type II membrane protein; transcript and mRNA length change induced by yeast-hypha transition; induced by Rim101, caspofungin; rat catheter and Spider biofilm induced
7.45	snR44d			snoRNA|Uncharacterized	Ca21chr3_C_albicans_SC5314	1305827	1305932	W	CAL0126344	H/ACA box small nucleolar RNA (snoRNA)
12.67	orf19.7363	KRE6	IPF1249.2|Contig4-2926_0012|orf6.8523|CA5661|CaO19.7363	ORF|Verified	Ca21chr3_C_albicans_SC5314	1306201	1308423	W	CAL0004712	Essential beta-1,6-glucan synthase subunit; change in mRNA length, not abundance, at yeast-hypha transition; alkaline induced by Rim101, on cell wall regeneration; Spider biofilm induced; Bcr1-repressed in RPMI a/a biofilms
12.67	orf19.7364		IPF1250.2|Contig4-2926_0007|orf6.8524|CA5662|IPF1250|CaO19.7364	ORF|Uncharacterized	Ca21chr3_C_albicans_SC5314	1309949	1311559	W	CAL0004715	Protein of unknown function
12.67	orf19.7365		IPF1251.1|Contig4-2926_0004|orf6.8525|CA5663|FYV10|CaO19.7365|IPF1251	ORF|Uncharacterized	Ca21chr3_C_albicans_SC5314	1312259	1313977	W	CAL0004719	Protein of unknown function
12.67	orf19.7366		IPF1252.1|Contig4-2926_0003|orf6.8526|CA5664|CaO19.7366|IPF1252	ORF|Uncharacterized	Ca21chr3_C_albicans_SC5314	1315064	1314003	C	CAL0004722	Protein of unknown function
12.67	orf19.7367	UBP1	IPF1255.1|Contig4-2926_0029|orf6.8527|CA5665|CaO19.7367	ORF|Uncharacterized	Ca21chr3_C_albicans_SC5314	1317812	1315398	C	CAL0004724	Protein of unknown function
12.67	orf19.7368		IPF1257.1|Contig4-3075_0021|orf6.8528|CA5666|CaO19.7368|PUB1	ORF|Uncharacterized	Ca21chr3_C_albicans_SC5314	1320481	1318949	C	CAL0004726	Protein of unknown function
12.67	orf19.7369	TRM12	IPF1259.1|Contig4-3093_0001|orf6.8529|CA5667|IPF1259|CaO19.7369	ORF|Uncharacterized	Ca21chr3_C_albicans_SC5314	1321965	1323224	W	CAL0004728	Protein of unknown function
12.67	orf19.7370		IPF1261.1|Contig4-3093_0003|orf6.8530|CA5668|IPF1261|CaO19.7370	ORF|Uncharacterized	Ca21chr3_C_albicans_SC5314	1323800	1324795	W	CAL0004748	Possible G-protein coupled receptor; vacuolar membrane transporter for cationic amino acids; PQ-loop motif; rat catheter and Spider biofilm induced
12.67	orf19.7371	ZCF35	IPF1264.2|Contig4-3093_0006|orf6.8531|CA5669|CaO19.7371|IPF1264	ORF|Uncharacterized	Ca21chr3_C_albicans_SC5314	1325561	1328869	W	CAL0004750	Zn(II)2Cys6 transcription factor; Hap43-induced; Spider biofilm induced
12.67	orf19.7372	MRR1	IPF1266.1|Contig4-3093_0008|orf6.8532|CA5670|HAP1|CaO19.7372|ZCF36|IPF1266	ORF|Verified	Ca21chr3_C_albicans_SC5314	1329371	1332697	W	CAL0004753	Putative Zn(II)2Cys6 transcription factor; regulator of MDR1 transcription; gain-of-function mutations cause upregulation of MDR1 (a plasma membrane multidrug efflux pump) and multidrug resistance; Hap43-induced
12.67	orf19.7374	CTA4	IPF1269.1|Contig4-3093_0011|orf6.8534|CA5671|CaO19.7374	ORF|Verified	Ca21chr3_C_albicans_SC5314	1333933	1336983	W	CAL0004760	Zn(II)2Cys6 transcription factor; induced by nitric oxide; induced by Mnl1 under weak acid stress; repressed upon adherence to polystyrene; Hap43-repressed; Spider biofilm induced
12.67	orf19.7375		IPF1271.1|Contig4-3093_0012|orf6.8535|CA5672|IPF1271|CaO19.7375|USA1|U1A	ORF|Uncharacterized	Ca21chr3_C_albicans_SC5314	1337711	1337097	C	CAL0004764	Putative U1A component of the U1 snRNP, involved in splicing; contains two RNA recognition motifs (RRMs); ortholog of S. cerevisiae MUD1
12.67	orf19.7376		IPF1272.1|Contig4-3093_0013|orf6.8536|CA5673|IPF1272|CaO19.7376	ORF|Uncharacterized	Ca21chr3_C_albicans_SC5314	1337894	1340182	W	CAL0004767	Protein of unknown function
12.67	orf19.7377	ASE1	CaO19.7377|IPF1274.2|Contig4-3093_0015|Contig4-3093_0018|orf6.8537|CA5674|IPF1274	ORF|Uncharacterized	Ca21chr3_C_albicans_SC5314	1340550	1343270	W	CAL0004769	Putative microtubule-associated protein; member of conserved Mcm1p regulon; periodic mRNA expression, peak at cell-cycle G2/M phase
12.67	orf19.7378		IPF1276.1|Contig4-3093_0019|orf6.8538|CA5675|SIS2|CaO19.7378	ORF|Uncharacterized	Ca21chr3_C_albicans_SC5314	1345056	1343440	C	CAL0004771	Protein of unknown function
12.67	orf19.7379	FAA2	IPF1278.1|Contig4-3093_0023|orf6.8539|CA5676|FAA2-4|FAA22|CaO19.7379|FAA24	ORF|Uncharacterized	Ca21chr3_C_albicans_SC5314	1347975	1345711	C	CAL0004773	Putative acyl CoA synthetase; expression regulated upon white-opaque switch; rat catheter biofilm induced; Spider biofilm induced
12.67	orf19.7380		IPF1286.1|Contig4-3093_0029|orf6.8540|CA5677|IPF1286	ORF|Uncharacterized	Ca21chr3_C_albicans_SC5314	1352462	1349946	C	CAL0004791	Protein of unknown function
12.67	orf19.7381	AHR1	IPF1292|IPF1292.1|Contig4-3093_0048|orf6.8541|CA5678|CaO19.7381|ZCF37	ORF|Verified	Ca21chr3_C_albicans_SC5314	1362620	1364494	W	CAL0004794	Zn(II)2Cys6 transcription factor; involved in regulation of adhesion genes; involved in white-opaque switch; forms complex with Mcm1; mutant is sensetive to 5-fluorocytosine and lithium chloride; Spider biofilm induced
12.67	orf19.7382	CAM1	IPF1299.1|IPF1296.1|Contig4-3093_0051|orf6.8542|orf19.7381.3|CA5679|CA5680|CAM1.exon2	ORF|Uncharacterized	Ca21chr3_C_albicans_SC5314	1366732	1368199	W	CAL0004797	Putative translation elongation factor eEF1 gamma; protein level decreased in stationary phase cultures; Spider biofilm repressed
12.67	orf19.7383	MNN9	IPF1301.1|Contig4-3093_0053|Contig4-3093_0054|orf6.8543|CA5681|CaO19.7383	ORF|Verified	Ca21chr3_C_albicans_SC5314	1368781	1369887	W	CAL0004800	Protein of N-linked outer-chain mannan biosynthesis; mutant has defective cell wall; required for wild-type hyphal growth; mutant is hygromycin B sensitive and vanadate resistant; has N-terminal membrane-spanning segment (positions 18-34)
12.67	orf19.7384	NOG1	IPF1302.2|Contig4-3036_0030|orf6.8544|CA5682|CaO19.7384	ORF|Verified	Ca21chr3_C_albicans_SC5314	1370294	1372216	W	CAL0004804	Putative GTPase; mutation confers hypersensitivity to 5-fluorocytosine (5-FC), 5-fluorouracil (5-FU), and tubercidin (7-deazaadenosine); repressed by prostaglandins; Hap43-induced
12.67	orf19.7385		IPF3333.1|Contig4-3036_0025|orf6.8545|CA5683|CaO19.7385|LEE1|IPF3333	ORF|Uncharacterized	Ca21chr3_C_albicans_SC5314	1373821	1375326	W	CAL0004807	CCCH zinc finger protein; Spider biofilm induced
12.67	orf19.7386		IPF3331.1|Contig4-3036_0022|orf6.8546|CA5684|MBA1|CaO19.7386|IPF3331	ORF|Uncharacterized	Ca21chr3_C_albicans_SC5314	1376387	1375512	C	CAL0004810	Protein of unknown function
12.67	orf19.7387	ELP3	IPF3330.1|Contig4-3036_0021|orf6.8547|CA5685|CaO19.7387|HPA1	ORF|Uncharacterized	Ca21chr3_C_albicans_SC5314	1376656	1378299	W	CAL0004812	Predicted histone acetyltransferase; role in regulation of transcription, tRNA wobble uridine modification; Spider biofilm induced
12.67	orf19.7388	PBS2	CaO19.7388|IPF3329.1|Contig4-3036_0020|orf6.8548|CA5686|IPF3329	ORF|Verified	Ca21chr3_C_albicans_SC5314	1380059	1378422	C	CAL0004814	MAPK kinase (MAPKK); role in osmotic and oxidative stress responses, oxidative stress adaptation; required for stress regulation of Hog1p localization and activity; functional homolog of S. cerevisiae Pbs2p
12.67	orf19.7389	REV3	IPF3327.2|Contig4-3036_0014|Contig4-3036_0018|orf6.8549|orf6.8550|CA5687|CA5689|orf19.7390|REV3.5F	ORF|Uncharacterized	Ca21chr3_C_albicans_SC5314	1380646	1385538	W	CAL0004816	Protein of unknown function
12.67	orf19.7391	OCH1	IPF3324.1|Contig4-3036_0012|orf6.8551|CA5690|CaO19.7391	ORF|Verified	Ca21chr3_C_albicans_SC5314	1386772	1385615	C	CAL0004830	Alpha-1,6-mannosyltransferase; initiates N-glycan outer chain branch addition; similar to S. cerevisiae Och1p; required for wild-type virulence in mouse intravenous infection; fungal-specific (no human or murine homolog)
12.67	orf19.7392	DED1	Contig4-3036_0007|orf6.8552|CA5691|IPF3320.1|CaO19.7392	ORF|Uncharacterized	Ca21chr3_C_albicans_SC5314	1390000	1387982	C	CAL0004832	Predicted ATP-dependent RNA helicase; RNA strand annealing activity; Spider biofilm induced
12.67	orf19.7393		IPF3316.1|Contig4-3036_0004|Contig4-3036_0005|orf6.8553|CA5692|CaO19.7393|UTR1	ORF|Uncharacterized	Ca21chr3_C_albicans_SC5314	1392923	1391145	C	CAL0004835	Predicted NAD+/NADH kinase; possible role in cellular iron ion homeostasis; Spider biofilm induced
12.67	orf19.7394	GDA1	IPF3313.1|Contig4-3036_0003|orf6.8554|CA5693|CaO19.7394	ORF|Verified	Ca21chr3_C_albicans_SC5314	1395621	1393822	C	CAL0004837	Golgi membrane GDPase, required for wild-type O-mannosylation, not N-glycosylation; required for wild-type hyphal induction, cell wall, and cell surface charge; not required for HeLa cell adherence; functional homolog of S. cerevisiae Gda1p
12.67	orf19.7395		IPF27313.1|orf6.8555|CaO19.7395	ORF|Dubious	Ca21chr3_C_albicans_SC5314	1395705	1396022	W	CAL0004840	Protein of unknown function
12.67	orf19.7396		IPF3311.2|Contig4-2982_0013|orf6.8556|CA5694|IPF3311|CaO19.7396	ORF|Uncharacterized	Ca21chr3_C_albicans_SC5314	1397110	1398315	W	CAL0004843	Protein of unknown function; Spider biofilm induced; Hap43-repressed
6.63	orf19.7397.1			ORF|Uncharacterized	Ca21chr3_C_albicans_SC5314	1403269	1402484	C	CAL0126163	Predicted ORF identical to NSA2
6.63	orf19.7397.3			ORF|Uncharacterized	Ca21chr3_C_albicans_SC5314	1405127	1404336	C	CAL0126161	Predicted ORF identical to orf19.7420
6.63	orf19.7417	TSA1	orf6.8577|IPF2431.1|Contig4-2982_0001|CA5714|TSA1A|IPF2431|CA5697|IPF18076.3f|IPF18076.1|CaO19.7417	ORF|Verified	Ca21chr3_C_albicans_SC5314	1406632	1406042	C	CAL0005458	TSA/alkyl hydroperoxide peroxidase C (AhPC) family protein; similar to thiol-dependent peroxidases of oxidative stress signaling; antigenic; hyphal surface, nucleus; yeast-form nucleus, cytoplasm; biofilm, phagocytosis, peroxide induced
6.63	orf19.7414	ALS6	IPF2663.2|Contig4-2957_0018|orf6.2110|CA5713|ALS97|CaO19.7414|orf6.8574	ORF|Verified	Ca21chr3_C_albicans_SC5314	1411972	1407872	C	CAL0005457	ALS family protein; expression in S. cerevisiae confers adhesion to gelatin; macrophage-induced gene; N-terminal adhesion domain; ALS family includes cell-surface glycoproteins, some with adhesin function
6.63	orf19.7413	MMS21	IPF2657.1|Contig4-2957_0012|orf6.8573|CA5712|CaO19.7413|IPF2657	ORF|Uncharacterized	Ca21chr3_C_albicans_SC5314	1416935	1416117	C	CAL0005456	Putative MMS21-SMC5-SMC6 complex component
6.63	orf19.7412	MUB1	IPF2656.1|Contig4-2957_0011|orf6.8572|CA5711|CaO19.7412	ORF|Uncharacterized	Ca21chr3_C_albicans_SC5314	1419477	1417276	C	CAL0005455	Predicted protein required for ubiquitination; role in meiosis, regulation of cell budding in S. cereviae; Spider biofilm induced
6.63	orf19.7411	OAC1	IPF2654.1|Contig4-2957_0008|orf6.8571|CA5710|CaO19.7411	ORF|Uncharacterized	Ca21chr3_C_albicans_SC5314	1420988	1419936	C	CAL0005454	Putative mitochondrial inner membrane transporter; rat catheter biofilm induced
6.63	orf19.7410	CYM1	IPF2653|IPF2653.1|Contig4-2957_0004|orf6.8570|CA5709|CaO19.7410	ORF|Uncharacterized	Ca21chr3_C_albicans_SC5314	1421546	1424650	W	CAL0005453	Putative metalloprotease of the mitochondrial intermembrane space; rat catheter biofilm induced
6.63	orf19.7409.1		IPF2652.2|CA5708|MRPL39	ORF|Uncharacterized	Ca21chr3_C_albicans_SC5314	1424951	1424739	C	CAF0007122	Protein of unknown function
6.63	orf19.7409	ERV25	IPF2651.2|Contig4-3029_0001|orf6.8569|CA5707|CaO19.7409	ORF|Verified	Ca21chr3_C_albicans_SC5314	1425325	1425972	W	CAL0005428	Component of COPII-coated vesicles; transcript induced upon filamentous growth; rat catheter biofilm repressed
6.63	orf19.7406		IPF2649.1|Contig4-3029_0002|orf6.8566|CA5706|SEC20|CaO19.7406|IPF2649	ORF|Uncharacterized	Ca21chr3_C_albicans_SC5314	1428029	1425969	C	CAL0005427	Protein of unknown function
6.63	orf19.7405		IPF2645.2|Contig4-3029_0003|orf6.8565|CA5705|CaO19.7405|IPF2645	ORF|Uncharacterized	Ca21chr3_C_albicans_SC5314	1429273	1428569	C	CAL0005426	Ortholog of Rad33; involved in nucleotide excision repair in S. cerevisiae; induced by Mnl1 under weak acid stress
6.63	orf19.7404		IPF2644.2|Contig4-3029_0004|orf6.8564|CA5704|CHA11|CaO19.7404|CHA1	ORF|Uncharacterized	Ca21chr3_C_albicans_SC5314	1429705	1430703	W	CAL0005425	Catabolic L-serine (L-threonine) deaminase;, catalyzes degradation of L-serine and L-threonine; required to use serine or threonine as a sole nitrogen source; Spider biofilm repressed
6.63	orf19.7403		IPF2643.1|Contig4-3029_0008|orf6.8563|CA5703|CaO19.7403|IPF2463	ORF|Uncharacterized	Ca21chr3_C_albicans_SC5314	1431432	1433687	W	CAL0005424	Protein of unknown function
6.63	orf19.7402	DOT1	IPF2639.1|Contig4-3029_0012|orf6.8562|CA5702|CaO19.7402|PCH1	ORF|Uncharacterized	Ca21chr3_C_albicans_SC5314	1434292	1438323	W	CAL0005423	Putative modulator of white-opaque switching
6.63	orf19.7401	ISW2	IPF2633.1|Contig4-3029_0013|CA5701|CaO19.7401|orf6.8561	ORF|Verified	Ca21chr3_C_albicans_SC5314	1441679	1438509	C	CAL0005422	Ortholog of S. cerevisiae Isw2; an ATPase involved in chromatin remodeling; required for chlamydospore formation; Hap43-induced gene; repressed by high-level peroxide stress
6.63	orf19.7400	ALS7	CaO19.7400|IPF19816.1|Contig4-2957_0018|CA5699|ALS94|ALS95|ALS96|ALS98|orf6.8560	ORF|Verified	Ca21chr3_C_albicans_SC5314	1446611	1451317	W	CAL0005421	ALS family protein; hypermutable contingency gene; growth-regulated, downregulated in biofilm; two variable repeat regions; expression in S. cerevisiae does not confer adhesiveness; ALS family includes adhesins, cell-surface glycoproteins
6.63	orf19.7398.1	TSA1B	IPF18075.2|CA5698|TSA1|IPF10875.5f	ORF|Verified	Ca21chr3_C_albicans_SC5314	1452471	1453061	W	CAF0007120	Putative peroxidase; orf19.7398.1 is contig-truncated fragment of gene identical to TSA1; Tsa1p and Tsa1Bp role under oxidative/reductive stress, hyphal cell wall formation; in hyphal nucleus, cell wall; yeast-form nucleus, cytoplasm
6.63	orf19.7419	HNT2	IPF2434.1|Contig4-2982_0003|orf6.8579|CA5715|CaO19.7419	ORF|Uncharacterized	Ca21chr3_C_albicans_SC5314	1453313	1453855	W	CAL0005459	Putative dinucleoside triphosphate hydrolase; induced upon low-level peroxide stress
6.63	orf19.7420		IPF2436.1|Contig4-2982_0004|orf6.8580|CA5716|CaO19.7420|MED6	ORF|Uncharacterized	Ca21chr3_C_albicans_SC5314	1453974	1454765	W	CAL0005486	Protein of unknown function
6.63	orf19.7421	CYP5	IPF2438.1|Contig4-2982_0006|orf6.8581|CA5717|CYP51|CaO19.7421|CPR51|CYP3	ORF|Verified	Ca21chr3_C_albicans_SC5314	1455477	1454866	C	CAL0005487	Putative peptidyl-prolyl cis-trans isomerase; macrophage-downregulated protein level; protein level decrease in stationary phase cultures; predicted endoplasmic reticulum (ER) localization
6.63	orf19.7422		LCP5|CaO19.7422|IPF2440.1|Contig4-2982_0008|orf6.8582|CA5718	ORF|Uncharacterized	Ca21chr3_C_albicans_SC5314	1456909	1455737	C	CAL0005488	Protein of unknown function
6.63	orf19.7424	NSA2	IPF2441.1|Contig4-2982_0009|Contig4-3080_0023|orf6.8584|CA5719|CaO19.7424|IPF2441	ORF|Uncharacterized	Ca21chr3_C_albicans_SC5314	1457022	1457807	W	CAL0005489	Putative protein constituent of 66S pre-ribosomal particles; Hap43-induced; repressed by prostaglandins
Componet:	GOID	GO_term	Cluster frequency	Background frequency	Corrected P-value	False discovery rate	Gene(s) annotated to the term	Directly Annotated GOID List
	43227	membrane-bounded organelle	37 out of 57 genes, 64.9%	2746 out of 6473 background genes, 42.4%	0.03952	0.12	C3_05820W_A:KRE6:C3_05860C_A:UBP1:C3_05880C_A:C3_05900W_A:ZCF35:MRR1:CTA4:C3_05940C_A:ASE1:HAL3:AHR1:CAM1:MNN9:NOG1:C3_06050C_A:ELP3:REV3:OCH1:DED1:GDA1:C3_06170C_A:TSA1:MMS21:OAC1:CYM1:C3_06240C_A:ERV25:C3_06280W_A:DOT1:ISW2:TSA1B:C3_06350W_A:CYP5:C3_06370C_A:NSA2	30176:9986:1990143:139:42645:30134:136:30133:16035:9514:5762:16021:30427:71513:30687:5886:790:5880:5844:16592:31429:71627:71004:151:30446:62040:5737:5829:5758:5783:5739:5794:51233:89716:932:5635:8623:5685:5743:9277:5819:5730:16020:5634:5801:137:30915:10494:5576:70847:5853:33588
	43231	intracellular membrane-bounded organelle	36 out of 57 genes, 63.2%	2674 out of 6473 background genes, 41.3%	0.05537	0.06	C3_05820W_A:KRE6:C3_05860C_A:UBP1:C3_05880C_A:C3_05900W_A:ZCF35:MRR1:CTA4:C3_05940C_A:ASE1:HAL3:AHR1:CAM1:MNN9:NOG1:C3_06050C_A:ELP3:REV3:OCH1:DED1:GDA1:C3_06170C_A:TSA1:MMS21:OAC1:CYM1:C3_06240C_A:C3_06280W_A:DOT1:ISW2:TSA1B:C3_06350W_A:CYP5:C3_06370C_A:NSA2	30176:9986:1990143:139:42645:136:30133:16035:9514:5762:30427:16021:71513:30687:5886:790:5880:5844:16592:31429:71627:71004:151:30446:62040:5737:5829:5758:5739:5783:5794:51233:89716:932:5635:8623:5685:5743:9277:5819:16020:5730:5801:5634:137:30915:10494:5576:70847:5853:33588

## Sheet: AMS4106
Supplementary file 4: Coding Sequences within Complex CNVs
Isolate	Chromosome
AMS4106	Chr4
CNV copy number	ORF ID	Standard Name	Alias	Feature Type	Chromosome	Start Position	Stop Position	Strand	Primary CGD ID	Description
2.68	orf19.2743		orf19.10257|IPF19520.2|IPF15357.2|Contig4-1974_0001|Contig4-2458_0009|RPH1|CaO19.2743	ORF|Uncharacterized	Ca21chr4_C_albicans_SC5314	533641	531821	C	CAL0004229	Protein of unknown function
2.68	orf19.2742		orf19.10256|IPF19112.1|orf6.884|CaO19.2742	ORF|Uncharacterized	Ca21chr4_C_albicans_SC5314	534009	534347	W	CAL0004228	Protein of unknown function
2.68	orf19.2740		orf19.10255|IPF17364.2|IPF14414.3|Contig4-1912_0001|Contig4-1912_0002|Contig4-2105_0004|orf6.4696|orf6.634|orf6.4697|CA2700|IPF1441|CA2701|IPF14414.exon2|IPF15360.2|IPF14414.exon1|CaO19.2740	ORF|Uncharacterized	Ca21chr4_C_albicans_SC5314	536699	534369	C	CAL0004227	Protein of unknown function
2.68	orf19.2739		orf19.10253|IPF19958.1|IPF19837.1|Contig4-1912_0004|Contig4-2105_0002|Contig4-2105_0003|orf6.4695|orf6.633|CA2699|RLF2|CaO19.2739	ORF|Uncharacterized	Ca21chr4_C_albicans_SC5314	538698	536980	C	CAL0004223	Protein of unknown function
2.68	orf19.2738	SUL2	orf19.10252|orf6.4694|IPF14417.2|IPF28993.1|Contig4-2105_0001|CA2698|SUL1	ORF|Uncharacterized	Ca21chr4_C_albicans_SC5314	541600	539120	C	CAL0004221	Putative sulfate transporter; transcript negatively regulated by Sfu1; amphotericin B induced; F-12/CO2 and Spider biofilm induced
2.68	orf19.2737		orf19.10251|IPF24588.1|IPF9167.2|Contig4-2731_0006|orf6.4693|CA2697|IPF9167|CA1296|IPF18712|IPF18712.1|CaO19.10251|CaO19.2737	ORF|Uncharacterized	Ca21chr4_C_albicans_SC5314	546002	543774	C	CAL0004219	Carbohydrate kinase domain-containing protein; Spider biofilm induced
2.68	orf19.2736	HFL2	orf19.10250|IPF24632.1|IPF9169.2|Contig4-2731_0003|orf6.4692|CA2696|CaO19.2736|BUR6|IPF9169|CaO19.10250	ORF|Uncharacterized	Ca21chr4_C_albicans_SC5314	547581	547141	C	CAL0004217	HAP5-like; ortholog of S. cerevisiae Bur6, a heterodimeric NC2 transcription regulator complex subunit; flucytosine induced
2.68	orf19.2735	SEN2	orf19.10249|IPF24615.1|IPF9170.2|Contig4-2731_0002|orf6.4691|CA2695|IPF9070|CaO19.10249|CaO19.2735	ORF|Verified	Ca21chr4_C_albicans_SC5314	549178	548009	C	CAL0004215	Putative tRNA splicing endonuclease subunit; mutation confers hypersensitivity to toxic ergosterol analog and to amphotericin B; 5'-UTR intron; Hap43-induced; Spider biofilm induced
2.68	snR79			snoRNA|Uncharacterized	Ca21chr4_C_albicans_SC5314	549369	549283	C	CAL0139950	C/D box small nucleolar RNA (snoRNA)
2.68	orf19.2734		orf19.10248|IPF9171|IPF9171.1|IPF29007.1|Contig4-2731_0001|orf6.4690|CA2694|SCD99|CaO19.2734	ORF|Uncharacterized	Ca21chr4_C_albicans_SC5314	550364	551371	W	CAL0004213	Protein with a glucose/ribitol dehydrogenase family domain; mutants are viable
2.68	orf19.2733		orf19.10247|IPF9173.2|IPF29004.1|orf6.4689|CA2693|orf6.4688|orf19.10246|orf19.2732|CA2692|IPF9173.5f	ORF|Uncharacterized	Ca21chr4_C_albicans_SC5314	551637	553190	W	CAL0004212	Putative subunit of phosphatidylinositol 3-kinase complexes I and II; transcription is activated in the presence of elevated CO2
3.88	orf19.2731		orf19.10245|IPF10251.3|orf6.2523|orf6.4687|orf6.4698|CaO19.2731	ORF|Uncharacterized	Ca21chr4_C_albicans_SC5314	553566	553228	C	CAL0004210	Protein of unknown function
3.88	orf19.2730		orf19.10244|IPF24597.1|IPF20076.1|Contig4-2458_0008|Contig4-2458_0009|orf6.2522|orf6.4699|orf6.885|CA1163|RPH2|CaO19.2730|IPF15357|CaO19.10244	ORF|Uncharacterized	Ca21chr4_C_albicans_SC5314	553938	555758	W	CAL0004209	Protein of unknown function
3.88	orf19.2728		orf19.10242|IPF24601.1|IPF10258.2|Contig4-2458_0004|orf6.2520|CA1162|RAD24|CaO19.2728|IPF10258|CaO19.10242	ORF|Uncharacterized	Ca21chr4_C_albicans_SC5314	555926	557695	W	CAL0004204	Protein of unknown function
3.88	orf19.2727	GRX3	orf19.10241|IPF24624.1|IPF10259.2|Contig4-2458_0002|orf6.2519|CA1161|CaO19.10241|CaO19.2727	ORF|Uncharacterized	Ca21chr4_C_albicans_SC5314	558606	557845	C	CAL0004203	Putative glutaredoxin; flucytosine induced; regulated by Gcn4p; repressed in response to amino acid starvation (3-aminotriazole treatment)
3.88	orf19.2726		orf19.10240|IPF24621.1|IPF10262.2|orf6.2518|CA1160|CaO19.2726|CaO19.10240|IPF10262	ORF|Uncharacterized	Ca21chr4_C_albicans_SC5314	559897	558959	C	CAL0004202	Putative plasma membrane protein; Plc1-regulated; Spider biofilm induced
3.88	orf19.2725		IPF29033.1|orf6.325|CaO19.2725	ORF|Dubious	Ca21chr4_C_albicans_SC5314	567228	566926	C	CAL0004201	Protein of unknown function
3.88	orf19.2724		orf19.10239|IPF6399.1|IPF17321.2|Contig4-1642_0002|Contig4-2420_0009|orf6.1970|orf6.2695|CA0817|IPF6339|CaO19.2724	ORF|Uncharacterized	Ca21chr4_C_albicans_SC5314	571922	573418	W	CAL0004199	Protein of unknown function; flow model, rat catheter and Spider biofilm induced; Hap43-repressed
3.88	orf19.2723	HIT1	orf19.10238|IPF19187.2|IPF6402.2|Contig4-1801_0001|orf6.2696|orf6.678|CA1271|CaO19.2723	ORF|Uncharacterized	Ca21chr4_C_albicans_SC5314	577406	577852	W	CAL0004198	Ortholog of S. cerevisiae Hit1; protein of unknown function required for high temperature growth; flow model biofilm induced; Spider biofilm induced
3.88	orf19.2722	CGR1	orf19.10237|IPF6403.2|IPF18718.1|Contig4-1801_0004|orf6.2697|orf6.677|CA1272|CaO19.2722	ORF|Verified	Ca21chr4_C_albicans_SC5314	579236	578214	C	CAL0004197	Negative regulator of yeast-form growth; HSP70 family member; induced by growth cessation at yeast-hyphal transition or in planktonic growth; physically interacts with Msi3p; similar to rat anti-aging gene, SMP30, stationary phase enriched
3.88	orf19.2721		orf19.10236|IPF6404.2|IPF29006.1|Contig4-1801_0005|Contig4-2673_0012|orf6.2698|orf6.676|CA0150|CaO19.2721|CDC123	ORF|Uncharacterized	Ca21chr4_C_albicans_SC5314	580529	579492	C	CAL0004196	Protein of unknown function
3.88	orf19.2720		orf19.10235|IPF19188.2|IPF6406.2|Contig4-2673_0010|orf6.2699|orf6.675|CA1273|CCT4|CaO19.2720	ORF|Uncharacterized	Ca21chr4_C_albicans_SC5314	580782	582416	W	CAL0004195	Cytosolic chaperonin Cct ring complex subunit; role in the assembly of actin and tubulins; Spider biofilm repressed
3.88	orf19.2717	SAS10	orf19.10232|IPF24603.1|IPF6410.2|Contig4-2673_0009|orf6.2702|CA1274|CaO19.2717	ORF|Verified	Ca21chr4_C_albicans_SC5314	584201	582507	C	CAL0004189	Putative U3-containing small subunit processome complex subunit; Hap43p-induced gene; mutation confers resistance to 5-fluorocytosine (5-FC); repressed upon high-level peroxide stress
3.88	orf19.2715	RPC53	CaO19.2715|orf19.10230|IPF24613.1|IPF19910.1|Contig4-2673_0008|orf6.2704|CA1275	ORF|Uncharacterized	Ca21chr4_C_albicans_SC5314	584483	585841	W	CAL0004186	Protein of unknown function
3.88	epsilon-4a		epsilon	long_terminal_repeat	Ca21chr4_C_albicans_SC5314	586328	585849	C	CAL0121176	Long terminal repeat (LTR); about 480 bp long, 9 copies per genome
3.88	orf19.2713		orf19.10228|IPF6415.2|IPF19655.2|Contig4-2673_0005|Contig4-2673_0006|orf6.2706|orf6.2729|CA1276|orf6.2705|orf6.2730|orf19.10229|orf19.2714|MSH5|CA1294|MSH5.3f	ORF|Uncharacterized	Ca21chr4_C_albicans_SC5314	586425	588897	W	CAL0004183	Protein of unknown function
3.88	orf19.2712	HCA4	orf19.10227|IPF24582.1|IPF6418.1|Contig4-2673_0001|orf6.2728|CaO19.2712|CA1293|CaO19.10227	ORF|Uncharacterized	Ca21chr4_C_albicans_SC5314	591191	588894	C	CAL0004182	Putative role in regulation of cell wall biogenesis; Hap43p-induced gene; possibly an essential gene, disruptants not obtained by UAU1 method; flow model and rat catheter biofilm induced
3.88	orf19.2711.1	MED20	IPF24628.1|IPF6419.2|Contig4-2190_0001|CA1292|SRB2.3f|SRB2.3	ORF|Verified	Ca21chr4_C_albicans_SC5314	592276	591485	C	CAF0006963	Subunit of the RNA polymerase II mediator complex; involved in control of filamentous growth and Spider biofilm formation; rat catheter biofilm repressed
3.88	orf19.2711		orf19.10226|IPF24584.1|IPF16752.2|Contig4-2190_0002|orf6.2727|CA1291|IPF16752|CaO19.10226|ELP2|CaO19.2711	ORF|Uncharacterized	Ca21chr4_C_albicans_SC5314	592522	594915	W	CAL0004181	Similar to S. cerevisiae Elp2, an Elongator complex subunit required for modification of wobble nucleosides in tRNA; repressed in core stress response
3.88	orf19.2710		orf19.10225|IPF24631.1|IPF16212.2|Contig4-1957_0003|Contig4-2190_0003|orf6.2726|CA1290|CaO19.10225|GLC8|CaO19.2710|IPF16212	ORF|Uncharacterized	Ca21chr4_C_albicans_SC5314	595271	595915	W	CAL0004180	Protein of unknown function
3.88	orf19.2709	ZUO1	orf19.10224|IPF16213.3|IPF29003.1|Contig4-1957_0002|orf6.2725|CA1289|IPF16213.2|CaO19.2709	ORF|Uncharacterized	Ca21chr4_C_albicans_SC5314	597368	596085	C	CAL0004174	Ortholog of S. cerevisiae Zuo1; a cytosolic ribosome-associated chaperone; likely to be essential for growth, based on an insertional mutagenesis strategy; Spider biofilm repressed
3.88	orf19.2708		orf19.10223|IPF24626.1|IPF14356.2|Contig4-1779_0002|orf6.1233|CA0377|IPF14356|CaO19.2708	ORF|Uncharacterized	Ca21chr4_C_albicans_SC5314	598349	597582	C	CAL0004172	Protein of unknown function
3.88	orf19.2707.1	QCR9	IPF24583.1|IPF14357.1|Contig4-1779_0001|CA0376	ORF|Verified	Ca21chr4_C_albicans_SC5314	598959	598762	C	CAF0006962	Putative ubiquinol cytochrome c reductase; shows colony morphology-related gene regulation by Ssn6p
3.88	orf19.2706	CRH11	orf19.10221|orf6.1231|IPF24611.1|IPF14360.2|Contig4-1894_0003|CA0375|CaO19.10221|CRH1|CaO19.2706	ORF|Verified	Ca21chr4_C_albicans_SC5314	600732	599371	C	CAL0004169	GPI-anchored cell wall transglycosylase, putative ortholog of S. cerevisiae Crh1p; predicted glycosyl hydrolase domain; similar to Csf4p and to antigenic A. fumigatus Aspf9; predicted Kex2p substrate; caspofungin-induced
3.88	orf19.2704		orf19.10219|IPF24674.1|IPF29030.1|orf6.5492|CaO19.10219|CaO19.2704	ORF|Dubious	Ca21chr4_C_albicans_SC5314	602846	603166	W	CAL0004166	Protein of unknown function
3.88	orf19.2703		orf19.10218|orf6.5491|IPF24607.1|IPF5045.1|Contig4-2809_0011|CA3266|CaO19.2703|CaO19.10218|IPF5045	ORF|Uncharacterized	Ca21chr4_C_albicans_SC5314	603321	604889	W	CAL0004165	Specificity factor required for ubiquitination and sorting of specific cargo proteins at the multivesicular body; ortholog of S. cerevisiae Ear1; transcript regulated by iron; Ssr1-represssed; Spider biofilm induced
3.88	orf19.2701		orf19.10216|IPF24639.1|IPF5043.1|Contig4-2809_0006|orf6.5489|CA6206|IPF5043|CaO19.2701|CaO19.10216	ORF|Uncharacterized	Ca21chr4_C_albicans_SC5314	605540	606058	W	CAL0004164	Protein of unknown function; Ras1 and Cyr1 repressed; rat catheter and Spider biofilm induced
3.88	orf19.2699	ABP1	orf19.10214|IPF24596.1|IPF5041.1|Contig4-2809_0004|orf6.5487|CA3265|CaO19.10214|CaO19.2699	ORF|Verified	Ca21chr4_C_albicans_SC5314	606596	608542	W	CAL0003553	Ortholog of S. cerevisiae Abp1; actin-binding protein of the cortical actin cytoskeleton; caspofungin induced; protein only detected in stationary phase yeast-form cultures; Spider biofilm repressed
3.88	orf19.2698		CaO19.2698|orf19.10213|IPF24663.1|IPF5035.1|Contig4-2809_0003|orf6.5486|CA3264|CaO19.10213|IPF5035	ORF|Uncharacterized	Ca21chr4_C_albicans_SC5314	609084	608758	C	CAL0003552	Protein of unknown function
3.88	orf19.2697		orf19.10212|IPF24635.1|IPF19781.1|Contig4-2782_0001|Contig4-2809_0001|orf6.5485|CA3263|UBR2|CaO19.10212|UBR12|CaO19.2697	ORF|Uncharacterized	Ca21chr4_C_albicans_SC5314	609473	615169	W	CAL0003551	Protein of unknown function
3.88	orf19.2695	UBR1	orf19.10210|IPF24638.1|IPF5026.2|Contig4-2782_0002|orf6.5483|CA3262|CaO19.10210|CaO19.2695|UBR11.3f|UBR11.3	ORF|Verified	Ca21chr4_C_albicans_SC5314	620665	615302	C	CAL0003550	Protein similar to S. cerevisiae Ubr1p ubiquitin-protein ligase; transposon mutation affects filamentous growth; Spider biofilm induced
3.88	orf19.2694	TYS1	orf19.10209|IPF24614.1|IPF5023.2|Contig4-2782_0005|Contig4-2865_0013|orf6.5482|CA3261|CaO19.2694|CaO19.10209	ORF|Uncharacterized	Ca21chr4_C_albicans_SC5314	621567	622796	W	CAL0003549	Putative tRNA-Tyr synthetase; downregulated upon phagocytosis by murine macrophages; stationary phase enriched protein; Spider biofilm repressed
3.88	orf19.2693	GST2	CaO19.10208|CaO19.2693|orf19.10208|Contig4-2782_0006|YNL229C|IPF24629.1|IPF7968.2|IPF7968|Contig4-2865_0012|orf6.5481|CA3260	ORF|Uncharacterized	Ca21chr4_C_albicans_SC5314	623611	622952	C	CAL0003548	Glutathione S transferase; induced by benomyl and in populations of cells exposed to fluconazole over multiple generations; regulated by Nrg1, Tup1; induced by nitric oxide; stationary phase enriched; Spider biofilm induced
3.88	orf19.2691		orf19.10206|IPF7970.1|IPF17602.2|Contig4-2865_0010|orf6.4801|orf6.5479|CA3259|IPF7970|CaO19.2691	ORF|Uncharacterized	Ca21chr4_C_albicans_SC5314	625096	624374	C	CAL0003546	Planktonic growth-induced gene
3.88	tT(UGU)1	tT(UGU)1	tT(UGU)1.2|tT(TGT)1	tRNA|Uncharacterized	Ca21chr4_C_albicans_SC5314	627499	627570	W	CAF0007244	tRNA-Thr, predicted by tRNAscan-SE; UGU anticodon
3.88	orf19.2690		MGM1|CaO19.2690|orf19.10205|IPF24572.1|IPF7974.1|Contig4-2865_0004|orf6.4800|CA2773|CaO19.10205	ORF|Uncharacterized	Ca21chr4_C_albicans_SC5314	627864	630557	W	CAL0003545	Putative mitochondrial GTPase; required for mitochondrial morphology and genome maintenance; Spider biofilm induced
3.88	orf19.2688	NAN1	orf19.10203|IPF24577.1|IPF20112.1|Contig4-2865_0003|orf6.4798|CA2772|CaO19.10203|IPF20112|CaO19.2688	ORF|Verified	Ca21chr4_C_albicans_SC5314	633200	630681	C	CAL0003534	Putative U3 snoRNP protein; Hap43p-induced gene; physically interacts with TAP-tagged Nop1p
3.88	orf19.2687.1		IPF24589.1|IPF7977.1|Contig4-2865_0002|CA2771|RPB10	ORF|Uncharacterized	Ca21chr4_C_albicans_SC5314	633514	633732	W	CAF0006961	Protein of unknown function
3.88	orf19.2686		CPS1|CaO19.2686|orf19.10201|IPF19440.2|IPF7980.2|Contig4-2865_0001|orf6.116|orf6.4796|CA2770	ORF|Uncharacterized	Ca21chr4_C_albicans_SC5314	635720	633978	C	CAL0003533	Protein of unknown function
3.88	zeta-4a		zeta	long_terminal_repeat	Ca21chr4_C_albicans_SC5314	637137	637644	W	CAL0121177	Long terminal repeat (LTR) associated with the transposon Tca7; about 508 bp long, 10-15 copies per genome
3.88	orf19.2685	PGA54	orf19.10200|IPF24619.1|IPF15870.2|Contig4-2214_0002|orf6.4795|CA2769|CaO19.2685|IPF15870|CaO19.10200	ORF|Uncharacterized	Ca21chr4_C_albicans_SC5314	639770	640798	W	CAL0003532	GPI-anchored protein; Hog1-repressed; induced in cyr1 or efg1 mutant or in hyphae; colony morphology-related gene regulation by Ssn6; induced in RHE model; mRNA binds She3; regulated in Spider biofilms by Tec1, Egf1, Ntd80, Rob1, Brg1
3.88	orf19.2684		orf19.10199|IPF24581.1|IPF17011.2|orf6.4794|CA2768|IPF17011|CaO19.10199|SLK19|CaO19.2684	ORF|Uncharacterized	Ca21chr4_C_albicans_SC5314	641845	644280	W	CAL0003531	Protein of unknown function; flow model biofilm repressed
3.88	orf19.2682		orf19.10197|IPF19155.2|IPF14884.2|Contig4-2016_0002|orf6.4792|orf6.742|CA2767|CaO19.2682|TOA1	ORF|Uncharacterized	Ca21chr4_C_albicans_SC5314	644984	645811	W	CAL0003530	Protein of unknown function
3.88	orf19.2681	RBT7	orf19.10196|IPF14885.2|IPF29009.1|Contig4-2806_0001|orf6.4791|orf6.741|CA0169|CaO19.2681	ORF|Uncharacterized	Ca21chr4_C_albicans_SC5314	646919	647896	W	CAL0003529	Protein with similarity to RNase T2 enzymes; has putative secretion signal; expression is Tup1-repressed
3.88	orf19.2680		orf19.10195|IPF24640.1|IPF6900.3|Contig4-2806_0003|Contig4-2806_0005|orf6.5554|orf6.740|CA3319|CaO19.2680|DRS25|DRS25.3eoc|IPF6900.2	ORF|Uncharacterized	Ca21chr4_C_albicans_SC5314	649268	654511	W	CAL0003528	Protein of unknown function
3.88	orf19.2678	BUB1	orf19.10193|IPF24575.1|IPF6898.2|Contig4-2806_0006|Contig4-2806_0007|orf6.5556|CA3320|CaO19.2678|CaO19.10193|IPF6898	ORF|Verified	Ca21chr4_C_albicans_SC5314	657311	654609	C	CAL0003517	Putative cell cycle checkpoint kinase; mutation confers increased sensitivity to nocodazole
3.88	orf19.2677		orf19.10192|IPF24578.1|IPF24606.1|IPF6895.2|IPF6896.2|Contig4-2806_0009|orf6.5557|CA3321|IPF6896.5f	ORF|Uncharacterized	Ca21chr4_C_albicans_SC5314	657654	659519	W	CAL0003516	Putative GPI transamidase component; possibly an essential gene, disruptants not obtained by UAU1 method
3.88	orf19.2676		orf19.10191|IPF24620.1|IPF6894.2|Contig4-2806_0011|orf6.5558|CA3323|CaO19.10191|CaO19.2676|IKI1	ORF|Uncharacterized	Ca21chr4_C_albicans_SC5314	660489	659593	C	CAL0003515	Predicted hexameric RecA-like ATPase Elp456 Elongator subcomplex subunit; required for modification of wobble nucleosides in tRNA; Spider biofilm induced
3.88	orf19.2675		HSH155|CaO19.10190|orf19.10190|IPF24671.1|IPF6893.2|orf6.5559|CA3324|IPF6893|CaO19.2675	ORF|Uncharacterized	Ca21chr4_C_albicans_SC5314	660680	663964	W	CAL0003514	Protein of unknown function
3.88	orf19.2674		orf19.10189|IPF24618.1|IPF6890.2|orf6.5560|CA3325|CaO19.2674|IPF6890|CaO19.10189	ORF|Uncharacterized	Ca21chr4_C_albicans_SC5314	665139	664111	C	CAL0003513	Putative transcription factor with zinc finger DNA-binding motif; Hap43p-repressed gene
3.88	orf19.2673		orf19.10188|IPF24617.1|IPF6889.2|Contig4-1603_0002|orf6.5561|CA3326|CaO19.10188|IPF6889|CaO19.2673	ORF|Uncharacterized	Ca21chr4_C_albicans_SC5314	665708	666727	W	CAL0003512	Protein of unknown function
3.88	orf19.2672	NCP1	orf19.10187|IPF24595.1|IPF10561.2|Contig4-2240_0006|orf6.5562|CA3327|PRD1|RED|CaO19.2672|CaO19.10187	ORF|Verified	Ca21chr4_C_albicans_SC5314	668328	670370	W	CAL0003511	NADPH-cytochrome P450 reductase, acts with Erg11p in sterol 14 alpha-demethylation in ergosterol biosynthesis; subject to hypoxic regulation; ketoconazole-induced; caspofungin repressed
2.9	orf19.2671		orf19.10186|IPF24612.1|IPF10564.2|Contig4-2584_0001|orf6.154|orf6.5563|CA3328|CaO19.2671|CaO19.10186|IPF10564	ORF|Uncharacterized	Ca21chr4_C_albicans_SC5314	671384	672727	W	CAL0003510	Protein with a predicted FAD-dependent pyridine nucleotide reductase domains; putative oxidoreductase; Plc1-regulated; possibly an essential gene, disruptants not obtained by UAU1 method
2.9	orf19.2670		orf19.10185|IPF12430.2|IPF12162.1|Contig4-2584_0002|orf6.1626|orf6.5564|CA3329|CaO19.2670|IPF12162|CaO19.10185	ORF|Uncharacterized	Ca21chr4_C_albicans_SC5314	673769	672894	C	CAL0003509	Protein of unknown function
2.9	san-4b		san	long_terminal_repeat	Ca21chr4_C_albicans_SC5314	674332	673952	C	CAL0121178	Long terminal repeat (LTR) associated with the transposon Tca4; about 381 bp long, 1-4 copies per genome
2.9	orf19.2669		IPF12161.2|Contig4-2757_0014|Contig4-3083_0024|orf6.5565|CA3330|CaO19.2669|POL21.3f|POL21.3	ORF|Uncharacterized|transposable element gene	Ca21chr4_C_albicans_SC5314	678707	674364	C	CAL0003498	ORF in retrotransposon Tca4; similar to Pol region of retrotransposons encoding reverse transcriptase, protease, integrase; downstream of RHD2, similar to the Gag region encoding nucleocapsid-like protein; rat catheter biofilm induced
2.9	orf19.2668	RHD2	IPF12158.1|IPF12159.2|Contig4-3083_0025|Contig4-3083_0027|orf6.5566|CA3332|POL21.5f|GAG	ORF|Uncharacterized|transposable element gene	Ca21chr4_C_albicans_SC5314	680277	679360	C	CAL0003497	Predicted ORF in retrotransposon Tca4 with similarity to the Gag region encoding nucleocapsid-like protein; overlaps blocked reading frame orf19.2668.1; yeast-enriched transcript; rat catheter biofilm induced
2.9	orf19.2668.1		CA3331|POL21.53f|POL.3|IPF12159.2	blocked_reading_frame|transposable element gene	Ca21chr4_C_albicans_SC5314	680277	678838	C	CAL0120651	Region in retrotransposon Tca4 annotated in Assembly 21 as a blocked reading frame, based on comparative genome analysis; overlaps orf19.2668, which is an open reading frame similar to Gag proteins of retrotransposons
2.9	Tca4-4		TCA4	retrotransposon	Ca21chr4_C_albicans_SC5314	680847	673952	C	CAF0007337	Retrotransposon Tca4 on Chromosome 4, about 6.9 kbp member of the copia group with two ORFs similar to gag and pol, flanked by 381-bp LTRs (san elements)
2.9	san-4a		san	long_terminal_repeat	Ca21chr4_C_albicans_SC5314	680847	680467	C	CAL0121179	Long terminal repeat (LTR) associated with the transposon Tca4; about 381 bp long, 1-4 copies per genome
2.9	orf19.2667	RPF1	orf19.10184|IPF12428.1|IPF12157.3|Contig4-3083_0028|orf6.1627|orf6.5567|CA0599|IPF12428|CaO19.2667	ORF|Uncharacterized	Ca21chr4_C_albicans_SC5314	680960	681850	W	CAL0003496	Putative nucleolar protein with a predicted role in the assembly and export of the large ribosomal subunit; essential for growth; rat catheter and Spider biofilm induced
2.9	orf19.2665	MSN5	orf19.10182|IPF18929.1|IPF24579.1|IPF29005.1|IPF12426.2|Contig4-3083_0029|orf6.1628|orf6.1629|CA0601|orf19.10183|orf19.2666|CA0600|MSN5.3f	ORF|Uncharacterized	Ca21chr4_C_albicans_SC5314	682600	686337	W	CAL0003494	Predicted karyopherin involved in nuclear import and export of proteins; flow model biofilm induced; Spider biofilm induced
2.9	orf19.2664		orf19.10181|IPF24573.1|IPF16761.2|Contig4-2457_0002|orf6.1472|CA0502|orf19.67|MKT1|CaO19.10181|IPF16761|CaO19.2664	ORF|Uncharacterized	Ca21chr4_C_albicans_SC5314	686742	689441	W	CAL0003493	Protein of unknown function
2.9	orf19.1440.2			ORF|Uncharacterized	Ca21chr4_C_albicans_SC5314	690462	690280	C	CAL0120537	Protein of unknown function
2.9	orf19.1440.1			ORF|Uncharacterized	Ca21chr4_C_albicans_SC5314	692595	692395	C	CAL0120535	Protein of unknown function
2.9	orf19.1440		orf19.9015|IPF25887.1|IPF10568.1|Contig4-2265_0003|orf6.1052|CA0279|CaO19.1440|IPF10568	ORF|Uncharacterized	Ca21chr4_C_albicans_SC5314	697817	698932	W	CAL0004584	Protein of unknown function
2.9	orf19.1439	IPK1	orf19.9013|IPF25886.1|IPF10566.1|Contig4-2265_0006|orf6.1053|CA0280|IPF10566|CaO19.1439	ORF|Uncharacterized	Ca21chr4_C_albicans_SC5314	699814	700899	W	CAL0004567	Ortholog of S. cerevisiae/S. pombe Ipk1; an inositol pentakisphosphate 2-kinase, a nuclear protein required for synthesis of 1,2,3,4,5,6-hexakisphosphate; Spider biofilm induced
2.9	orf19.1438		orf19.9012|IPF19419.2|IPF10565.1|Contig4-2265_0007|orf6.1054|orf6.155|CA0281|CPD2|CaO19.1438|IPF10565|IPF10564.3	ORF|Uncharacterized	Ca21chr4_C_albicans_SC5314	702384	701161	C	CAL0004565	Protein with homology to NADH dehydrogenase; regulated by Sef1p-, Sfu1p-, and Hap43p
2.9	orf19.3362		orf19.10870|IPF23891.1|IPF15758.2|Contig4-2353_0001|orf6.1783|CaO19.3362|CaO19.10870	ORF|Uncharacterized	Ca21chr4_C_albicans_SC5314	704120	702777	C	CAL0004170	Protein of unknown function
No GO terms Identified

## Sheet: AMS4444
Supplementary file 4: Coding Sequences within Complex CNVs
Isolate	Chromosome
AMS4444	Chr4
CNV copy number	ORF ID	Standard Name	Alias	Feature Type	Chromosome	Start Position	Stop Position	Strand	Primary CGD ID	Description
3.46	orf19.2743		orf19.10257|IPF19520.2|IPF15357.2|Contig4-1974_0001|Contig4-2458_0009|RPH1|CaO19.2743	ORF|Uncharacterized	Ca21chr4_C_albicans_SC5314	533641	531821	C	CAL0004229	Protein of unknown function
3.46	orf19.2742		orf19.10256|IPF19112.1|orf6.884|CaO19.2742	ORF|Uncharacterized	Ca21chr4_C_albicans_SC5314	534009	534347	W	CAL0004228	Protein of unknown function
3.46	orf19.2740		orf19.10255|IPF17364.2|IPF14414.3|Contig4-1912_0001|Contig4-1912_0002|Contig4-2105_0004|orf6.4696|orf6.634|orf6.4697|CA2700|IPF1441|CA2701|IPF14414.exon2|IPF15360.2|IPF14414.exon1|CaO19.2740	ORF|Uncharacterized	Ca21chr4_C_albicans_SC5314	536699	534369	C	CAL0004227	Protein of unknown function
3.46	orf19.2739		orf19.10253|IPF19958.1|IPF19837.1|Contig4-1912_0004|Contig4-2105_0002|Contig4-2105_0003|orf6.4695|orf6.633|CA2699|RLF2|CaO19.2739	ORF|Uncharacterized	Ca21chr4_C_albicans_SC5314	538698	536980	C	CAL0004223	Protein of unknown function
3.46	orf19.2738	SUL2	orf19.10252|orf6.4694|IPF14417.2|IPF28993.1|Contig4-2105_0001|CA2698|SUL1	ORF|Uncharacterized	Ca21chr4_C_albicans_SC5314	541600	539120	C	CAL0004221	Putative sulfate transporter; transcript negatively regulated by Sfu1; amphotericin B induced; F-12/CO2 and Spider biofilm induced
3.46	orf19.2737		orf19.10251|IPF24588.1|IPF9167.2|Contig4-2731_0006|orf6.4693|CA2697|IPF9167|CA1296|IPF18712|IPF18712.1|CaO19.10251|CaO19.2737	ORF|Uncharacterized	Ca21chr4_C_albicans_SC5314	546002	543774	C	CAL0004219	Carbohydrate kinase domain-containing protein; Spider biofilm induced
3.46	orf19.2736	HFL2	orf19.10250|IPF24632.1|IPF9169.2|Contig4-2731_0003|orf6.4692|CA2696|CaO19.2736|BUR6|IPF9169|CaO19.10250	ORF|Uncharacterized	Ca21chr4_C_albicans_SC5314	547581	547141	C	CAL0004217	HAP5-like; ortholog of S. cerevisiae Bur6, a heterodimeric NC2 transcription regulator complex subunit; flucytosine induced
3.46	orf19.2735	SEN2	orf19.10249|IPF24615.1|IPF9170.2|Contig4-2731_0002|orf6.4691|CA2695|IPF9070|CaO19.10249|CaO19.2735	ORF|Verified	Ca21chr4_C_albicans_SC5314	549178	548009	C	CAL0004215	Putative tRNA splicing endonuclease subunit; mutation confers hypersensitivity to toxic ergosterol analog and to amphotericin B; 5'-UTR intron; Hap43-induced; Spider biofilm induced
3.46	snR79			snoRNA|Uncharacterized	Ca21chr4_C_albicans_SC5314	549369	549283	C	CAL0139950	C/D box small nucleolar RNA (snoRNA)
3.46	orf19.2734		orf19.10248|IPF9171|IPF9171.1|IPF29007.1|Contig4-2731_0001|orf6.4690|CA2694|SCD99|CaO19.2734	ORF|Uncharacterized	Ca21chr4_C_albicans_SC5314	550364	551371	W	CAL0004213	Protein with a glucose/ribitol dehydrogenase family domain; mutants are viable
3.46	orf19.2733		orf19.10247|IPF9173.2|IPF29004.1|orf6.4689|CA2693|orf6.4688|orf19.10246|orf19.2732|CA2692|IPF9173.5f	ORF|Uncharacterized	Ca21chr4_C_albicans_SC5314	551637	553190	W	CAL0004212	Putative subunit of phosphatidylinositol 3-kinase complexes I and II; transcription is activated in the presence of elevated CO2
3.46	orf19.2731		orf19.10245|IPF10251.3|orf6.2523|orf6.4687|orf6.4698|CaO19.2731	ORF|Uncharacterized	Ca21chr4_C_albicans_SC5314	553566	553228	C	CAL0004210	Protein of unknown function
3.46	orf19.2730		orf19.10244|IPF24597.1|IPF20076.1|Contig4-2458_0008|Contig4-2458_0009|orf6.2522|orf6.4699|orf6.885|CA1163|RPH2|CaO19.2730|IPF15357|CaO19.10244	ORF|Uncharacterized	Ca21chr4_C_albicans_SC5314	553938	555758	W	CAL0004209	Protein of unknown function
4.52	orf19.2728		orf19.10242|IPF24601.1|IPF10258.2|Contig4-2458_0004|orf6.2520|CA1162|RAD24|CaO19.2728|IPF10258|CaO19.10242	ORF|Uncharacterized	Ca21chr4_C_albicans_SC5314	555926	557695	W	CAL0004204	Protein of unknown function
4.52	orf19.2727	GRX3	orf19.10241|IPF24624.1|IPF10259.2|Contig4-2458_0002|orf6.2519|CA1161|CaO19.10241|CaO19.2727	ORF|Uncharacterized	Ca21chr4_C_albicans_SC5314	558606	557845	C	CAL0004203	Putative glutaredoxin; flucytosine induced; regulated by Gcn4p; repressed in response to amino acid starvation (3-aminotriazole treatment)
4.52	orf19.2726		orf19.10240|IPF24621.1|IPF10262.2|orf6.2518|CA1160|CaO19.2726|CaO19.10240|IPF10262	ORF|Uncharacterized	Ca21chr4_C_albicans_SC5314	559897	558959	C	CAL0004202	Putative plasma membrane protein; Plc1-regulated; Spider biofilm induced
4.52	orf19.2725		IPF29033.1|orf6.325|CaO19.2725	ORF|Dubious	Ca21chr4_C_albicans_SC5314	567228	566926	C	CAL0004201	Protein of unknown function
4.52	orf19.2724		orf19.10239|IPF6399.1|IPF17321.2|Contig4-1642_0002|Contig4-2420_0009|orf6.1970|orf6.2695|CA0817|IPF6339|CaO19.2724	ORF|Uncharacterized	Ca21chr4_C_albicans_SC5314	571922	573418	W	CAL0004199	Protein of unknown function; flow model, rat catheter and Spider biofilm induced; Hap43-repressed
4.52	orf19.2723	HIT1	orf19.10238|IPF19187.2|IPF6402.2|Contig4-1801_0001|orf6.2696|orf6.678|CA1271|CaO19.2723	ORF|Uncharacterized	Ca21chr4_C_albicans_SC5314	577406	577852	W	CAL0004198	Ortholog of S. cerevisiae Hit1; protein of unknown function required for high temperature growth; flow model biofilm induced; Spider biofilm induced
4.52	orf19.2722	CGR1	orf19.10237|IPF6403.2|IPF18718.1|Contig4-1801_0004|orf6.2697|orf6.677|CA1272|CaO19.2722	ORF|Verified	Ca21chr4_C_albicans_SC5314	579236	578214	C	CAL0004197	Negative regulator of yeast-form growth; HSP70 family member; induced by growth cessation at yeast-hyphal transition or in planktonic growth; physically interacts with Msi3p; similar to rat anti-aging gene, SMP30, stationary phase enriched
4.52	orf19.2721		orf19.10236|IPF6404.2|IPF29006.1|Contig4-1801_0005|Contig4-2673_0012|orf6.2698|orf6.676|CA0150|CaO19.2721|CDC123	ORF|Uncharacterized	Ca21chr4_C_albicans_SC5314	580529	579492	C	CAL0004196	Protein of unknown function
4.52	orf19.2720		orf19.10235|IPF19188.2|IPF6406.2|Contig4-2673_0010|orf6.2699|orf6.675|CA1273|CCT4|CaO19.2720	ORF|Uncharacterized	Ca21chr4_C_albicans_SC5314	580782	582416	W	CAL0004195	Cytosolic chaperonin Cct ring complex subunit; role in the assembly of actin and tubulins; Spider biofilm repressed
4.52	orf19.2717	SAS10	orf19.10232|IPF24603.1|IPF6410.2|Contig4-2673_0009|orf6.2702|CA1274|CaO19.2717	ORF|Verified	Ca21chr4_C_albicans_SC5314	584201	582507	C	CAL0004189	Putative U3-containing small subunit processome complex subunit; Hap43p-induced gene; mutation confers resistance to 5-fluorocytosine (5-FC); repressed upon high-level peroxide stress
4.52	orf19.2715	RPC53	CaO19.2715|orf19.10230|IPF24613.1|IPF19910.1|Contig4-2673_0008|orf6.2704|CA1275	ORF|Uncharacterized	Ca21chr4_C_albicans_SC5314	584483	585841	W	CAL0004186	Protein of unknown function
4.52	epsilon-4a		epsilon	long_terminal_repeat	Ca21chr4_C_albicans_SC5314	586328	585849	C	CAL0121176	Long terminal repeat (LTR); about 480 bp long, 9 copies per genome
4.52	orf19.2713		orf19.10228|IPF6415.2|IPF19655.2|Contig4-2673_0005|Contig4-2673_0006|orf6.2706|orf6.2729|CA1276|orf6.2705|orf6.2730|orf19.10229|orf19.2714|MSH5|CA1294|MSH5.3f	ORF|Uncharacterized	Ca21chr4_C_albicans_SC5314	586425	588897	W	CAL0004183	Protein of unknown function
4.52	orf19.2712	HCA4	orf19.10227|IPF24582.1|IPF6418.1|Contig4-2673_0001|orf6.2728|CaO19.2712|CA1293|CaO19.10227	ORF|Uncharacterized	Ca21chr4_C_albicans_SC5314	591191	588894	C	CAL0004182	Putative role in regulation of cell wall biogenesis; Hap43p-induced gene; possibly an essential gene, disruptants not obtained by UAU1 method; flow model and rat catheter biofilm induced
4.52	orf19.2711.1	MED20	IPF24628.1|IPF6419.2|Contig4-2190_0001|CA1292|SRB2.3f|SRB2.3	ORF|Verified	Ca21chr4_C_albicans_SC5314	592276	591485	C	CAF0006963	Subunit of the RNA polymerase II mediator complex; involved in control of filamentous growth and Spider biofilm formation; rat catheter biofilm repressed
4.52	orf19.2711		orf19.10226|IPF24584.1|IPF16752.2|Contig4-2190_0002|orf6.2727|CA1291|IPF16752|CaO19.10226|ELP2|CaO19.2711	ORF|Uncharacterized	Ca21chr4_C_albicans_SC5314	592522	594915	W	CAL0004181	Similar to S. cerevisiae Elp2, an Elongator complex subunit required for modification of wobble nucleosides in tRNA; repressed in core stress response
4.52	orf19.2710		orf19.10225|IPF24631.1|IPF16212.2|Contig4-1957_0003|Contig4-2190_0003|orf6.2726|CA1290|CaO19.10225|GLC8|CaO19.2710|IPF16212	ORF|Uncharacterized	Ca21chr4_C_albicans_SC5314	595271	595915	W	CAL0004180	Protein of unknown function
4.52	orf19.2709	ZUO1	orf19.10224|IPF16213.3|IPF29003.1|Contig4-1957_0002|orf6.2725|CA1289|IPF16213.2|CaO19.2709	ORF|Uncharacterized	Ca21chr4_C_albicans_SC5314	597368	596085	C	CAL0004174	Ortholog of S. cerevisiae Zuo1; a cytosolic ribosome-associated chaperone; likely to be essential for growth, based on an insertional mutagenesis strategy; Spider biofilm repressed
4.52	orf19.2708		orf19.10223|IPF24626.1|IPF14356.2|Contig4-1779_0002|orf6.1233|CA0377|IPF14356|CaO19.2708	ORF|Uncharacterized	Ca21chr4_C_albicans_SC5314	598349	597582	C	CAL0004172	Protein of unknown function
4.52	orf19.2707.1	QCR9	IPF24583.1|IPF14357.1|Contig4-1779_0001|CA0376	ORF|Verified	Ca21chr4_C_albicans_SC5314	598959	598762	C	CAF0006962	Putative ubiquinol cytochrome c reductase; shows colony morphology-related gene regulation by Ssn6p
4.52	orf19.2706	CRH11	orf19.10221|orf6.1231|IPF24611.1|IPF14360.2|Contig4-1894_0003|CA0375|CaO19.10221|CRH1|CaO19.2706	ORF|Verified	Ca21chr4_C_albicans_SC5314	600732	599371	C	CAL0004169	GPI-anchored cell wall transglycosylase, putative ortholog of S. cerevisiae Crh1p; predicted glycosyl hydrolase domain; similar to Csf4p and to antigenic A. fumigatus Aspf9; predicted Kex2p substrate; caspofungin-induced
4.52	orf19.2704		orf19.10219|IPF24674.1|IPF29030.1|orf6.5492|CaO19.10219|CaO19.2704	ORF|Dubious	Ca21chr4_C_albicans_SC5314	602846	603166	W	CAL0004166	Protein of unknown function
4.52	orf19.2703		orf19.10218|orf6.5491|IPF24607.1|IPF5045.1|Contig4-2809_0011|CA3266|CaO19.2703|CaO19.10218|IPF5045	ORF|Uncharacterized	Ca21chr4_C_albicans_SC5314	603321	604889	W	CAL0004165	Specificity factor required for ubiquitination and sorting of specific cargo proteins at the multivesicular body; ortholog of S. cerevisiae Ear1; transcript regulated by iron; Ssr1-represssed; Spider biofilm induced
4.52	orf19.2701		orf19.10216|IPF24639.1|IPF5043.1|Contig4-2809_0006|orf6.5489|CA6206|IPF5043|CaO19.2701|CaO19.10216	ORF|Uncharacterized	Ca21chr4_C_albicans_SC5314	605540	606058	W	CAL0004164	Protein of unknown function; Ras1 and Cyr1 repressed; rat catheter and Spider biofilm induced
4.52	orf19.2699	ABP1	orf19.10214|IPF24596.1|IPF5041.1|Contig4-2809_0004|orf6.5487|CA3265|CaO19.10214|CaO19.2699	ORF|Verified	Ca21chr4_C_albicans_SC5314	606596	608542	W	CAL0003553	Ortholog of S. cerevisiae Abp1; actin-binding protein of the cortical actin cytoskeleton; caspofungin induced; protein only detected in stationary phase yeast-form cultures; Spider biofilm repressed
4.52	orf19.2698		CaO19.2698|orf19.10213|IPF24663.1|IPF5035.1|Contig4-2809_0003|orf6.5486|CA3264|CaO19.10213|IPF5035	ORF|Uncharacterized	Ca21chr4_C_albicans_SC5314	609084	608758	C	CAL0003552	Protein of unknown function
4.52	orf19.2697		orf19.10212|IPF24635.1|IPF19781.1|Contig4-2782_0001|Contig4-2809_0001|orf6.5485|CA3263|UBR2|CaO19.10212|UBR12|CaO19.2697	ORF|Uncharacterized	Ca21chr4_C_albicans_SC5314	609473	615169	W	CAL0003551	Protein of unknown function
4.52	orf19.2695	UBR1	orf19.10210|IPF24638.1|IPF5026.2|Contig4-2782_0002|orf6.5483|CA3262|CaO19.10210|CaO19.2695|UBR11.3f|UBR11.3	ORF|Verified	Ca21chr4_C_albicans_SC5314	620665	615302	C	CAL0003550	Protein similar to S. cerevisiae Ubr1p ubiquitin-protein ligase; transposon mutation affects filamentous growth; Spider biofilm induced
4.52	orf19.2694	TYS1	orf19.10209|IPF24614.1|IPF5023.2|Contig4-2782_0005|Contig4-2865_0013|orf6.5482|CA3261|CaO19.2694|CaO19.10209	ORF|Uncharacterized	Ca21chr4_C_albicans_SC5314	621567	622796	W	CAL0003549	Putative tRNA-Tyr synthetase; downregulated upon phagocytosis by murine macrophages; stationary phase enriched protein; Spider biofilm repressed
4.52	orf19.2693	GST2	CaO19.10208|CaO19.2693|orf19.10208|Contig4-2782_0006|YNL229C|IPF24629.1|IPF7968.2|IPF7968|Contig4-2865_0012|orf6.5481|CA3260	ORF|Uncharacterized	Ca21chr4_C_albicans_SC5314	623611	622952	C	CAL0003548	Glutathione S transferase; induced by benomyl and in populations of cells exposed to fluconazole over multiple generations; regulated by Nrg1, Tup1; induced by nitric oxide; stationary phase enriched; Spider biofilm induced
4.52	orf19.2691		orf19.10206|IPF7970.1|IPF17602.2|Contig4-2865_0010|orf6.4801|orf6.5479|CA3259|IPF7970|CaO19.2691	ORF|Uncharacterized	Ca21chr4_C_albicans_SC5314	625096	624374	C	CAL0003546	Planktonic growth-induced gene
4.52	tT(UGU)1	tT(UGU)1	tT(UGU)1.2|tT(TGT)1	tRNA|Uncharacterized	Ca21chr4_C_albicans_SC5314	627499	627570	W	CAF0007244	tRNA-Thr, predicted by tRNAscan-SE; UGU anticodon
4.52	orf19.2690		MGM1|CaO19.2690|orf19.10205|IPF24572.1|IPF7974.1|Contig4-2865_0004|orf6.4800|CA2773|CaO19.10205	ORF|Uncharacterized	Ca21chr4_C_albicans_SC5314	627864	630557	W	CAL0003545	Putative mitochondrial GTPase; required for mitochondrial morphology and genome maintenance; Spider biofilm induced
4.52	orf19.2688	NAN1	orf19.10203|IPF24577.1|IPF20112.1|Contig4-2865_0003|orf6.4798|CA2772|CaO19.10203|IPF20112|CaO19.2688	ORF|Verified	Ca21chr4_C_albicans_SC5314	633200	630681	C	CAL0003534	Putative U3 snoRNP protein; Hap43p-induced gene; physically interacts with TAP-tagged Nop1p
4.52	orf19.2687.1		IPF24589.1|IPF7977.1|Contig4-2865_0002|CA2771|RPB10	ORF|Uncharacterized	Ca21chr4_C_albicans_SC5314	633514	633732	W	CAF0006961	Protein of unknown function
4.52	orf19.2686		CPS1|CaO19.2686|orf19.10201|IPF19440.2|IPF7980.2|Contig4-2865_0001|orf6.116|orf6.4796|CA2770	ORF|Uncharacterized	Ca21chr4_C_albicans_SC5314	635720	633978	C	CAL0003533	Protein of unknown function
4.52	zeta-4a		zeta	long_terminal_repeat	Ca21chr4_C_albicans_SC5314	637137	637644	W	CAL0121177	Long terminal repeat (LTR) associated with the transposon Tca7; about 508 bp long, 10-15 copies per genome
4.52	orf19.2685	PGA54	orf19.10200|IPF24619.1|IPF15870.2|Contig4-2214_0002|orf6.4795|CA2769|CaO19.2685|IPF15870|CaO19.10200	ORF|Uncharacterized	Ca21chr4_C_albicans_SC5314	639770	640798	W	CAL0003532	GPI-anchored protein; Hog1-repressed; induced in cyr1 or efg1 mutant or in hyphae; colony morphology-related gene regulation by Ssn6; induced in RHE model; mRNA binds She3; regulated in Spider biofilms by Tec1, Egf1, Ntd80, Rob1, Brg1
4.52	orf19.2684		orf19.10199|IPF24581.1|IPF17011.2|orf6.4794|CA2768|IPF17011|CaO19.10199|SLK19|CaO19.2684	ORF|Uncharacterized	Ca21chr4_C_albicans_SC5314	641845	644280	W	CAL0003531	Protein of unknown function; flow model biofilm repressed
4.52	orf19.2682		orf19.10197|IPF19155.2|IPF14884.2|Contig4-2016_0002|orf6.4792|orf6.742|CA2767|CaO19.2682|TOA1	ORF|Uncharacterized	Ca21chr4_C_albicans_SC5314	644984	645811	W	CAL0003530	Protein of unknown function
4.52	orf19.2681	RBT7	orf19.10196|IPF14885.2|IPF29009.1|Contig4-2806_0001|orf6.4791|orf6.741|CA0169|CaO19.2681	ORF|Uncharacterized	Ca21chr4_C_albicans_SC5314	646919	647896	W	CAL0003529	Protein with similarity to RNase T2 enzymes; has putative secretion signal; expression is Tup1-repressed
4.52	orf19.2680		orf19.10195|IPF24640.1|IPF6900.3|Contig4-2806_0003|Contig4-2806_0005|orf6.5554|orf6.740|CA3319|CaO19.2680|DRS25|DRS25.3eoc|IPF6900.2	ORF|Uncharacterized	Ca21chr4_C_albicans_SC5314	649268	654511	W	CAL0003528	Protein of unknown function
4.52	orf19.2678	BUB1	orf19.10193|IPF24575.1|IPF6898.2|Contig4-2806_0006|Contig4-2806_0007|orf6.5556|CA3320|CaO19.2678|CaO19.10193|IPF6898	ORF|Verified	Ca21chr4_C_albicans_SC5314	657311	654609	C	CAL0003517	Putative cell cycle checkpoint kinase; mutation confers increased sensitivity to nocodazole
4.52	orf19.2677		orf19.10192|IPF24578.1|IPF24606.1|IPF6895.2|IPF6896.2|Contig4-2806_0009|orf6.5557|CA3321|IPF6896.5f	ORF|Uncharacterized	Ca21chr4_C_albicans_SC5314	657654	659519	W	CAL0003516	Putative GPI transamidase component; possibly an essential gene, disruptants not obtained by UAU1 method
4.52	orf19.2676		orf19.10191|IPF24620.1|IPF6894.2|Contig4-2806_0011|orf6.5558|CA3323|CaO19.10191|CaO19.2676|IKI1	ORF|Uncharacterized	Ca21chr4_C_albicans_SC5314	660489	659593	C	CAL0003515	Predicted hexameric RecA-like ATPase Elp456 Elongator subcomplex subunit; required for modification of wobble nucleosides in tRNA; Spider biofilm induced
4.52	orf19.2675		HSH155|CaO19.10190|orf19.10190|IPF24671.1|IPF6893.2|orf6.5559|CA3324|IPF6893|CaO19.2675	ORF|Uncharacterized	Ca21chr4_C_albicans_SC5314	660680	663964	W	CAL0003514	Protein of unknown function
4.52	orf19.2674		orf19.10189|IPF24618.1|IPF6890.2|orf6.5560|CA3325|CaO19.2674|IPF6890|CaO19.10189	ORF|Uncharacterized	Ca21chr4_C_albicans_SC5314	665139	664111	C	CAL0003513	Putative transcription factor with zinc finger DNA-binding motif; Hap43p-repressed gene
4.52	orf19.2673		orf19.10188|IPF24617.1|IPF6889.2|Contig4-1603_0002|orf6.5561|CA3326|CaO19.10188|IPF6889|CaO19.2673	ORF|Uncharacterized	Ca21chr4_C_albicans_SC5314	665708	666727	W	CAL0003512	Protein of unknown function
4.52	orf19.2672	NCP1	orf19.10187|IPF24595.1|IPF10561.2|Contig4-2240_0006|orf6.5562|CA3327|PRD1|RED|CaO19.2672|CaO19.10187	ORF|Verified	Ca21chr4_C_albicans_SC5314	668328	670370	W	CAL0003511	NADPH-cytochrome P450 reductase, acts with Erg11p in sterol 14 alpha-demethylation in ergosterol biosynthesis; subject to hypoxic regulation; ketoconazole-induced; caspofungin repressed
4.52	orf19.2671		orf19.10186|IPF24612.1|IPF10564.2|Contig4-2584_0001|orf6.154|orf6.5563|CA3328|CaO19.2671|CaO19.10186|IPF10564	ORF|Uncharacterized	Ca21chr4_C_albicans_SC5314	671384	672727	W	CAL0003510	Protein with a predicted FAD-dependent pyridine nucleotide reductase domains; putative oxidoreductase; Plc1-regulated; possibly an essential gene, disruptants not obtained by UAU1 method
4.52	orf19.2670		orf19.10185|IPF12430.2|IPF12162.1|Contig4-2584_0002|orf6.1626|orf6.5564|CA3329|CaO19.2670|IPF12162|CaO19.10185	ORF|Uncharacterized	Ca21chr4_C_albicans_SC5314	673769	672894	C	CAL0003509	Protein of unknown function
4.52	san-4b		san	long_terminal_repeat	Ca21chr4_C_albicans_SC5314	674332	673952	C	CAL0121178	Long terminal repeat (LTR) associated with the transposon Tca4; about 381 bp long, 1-4 copies per genome
4.52	orf19.2669		IPF12161.2|Contig4-2757_0014|Contig4-3083_0024|orf6.5565|CA3330|CaO19.2669|POL21.3f|POL21.3	ORF|Uncharacterized|transposable element gene	Ca21chr4_C_albicans_SC5314	678707	674364	C	CAL0003498	ORF in retrotransposon Tca4; similar to Pol region of retrotransposons encoding reverse transcriptase, protease, integrase; downstream of RHD2, similar to the Gag region encoding nucleocapsid-like protein; rat catheter biofilm induced
4.52	orf19.2668	RHD2	IPF12158.1|IPF12159.2|Contig4-3083_0025|Contig4-3083_0027|orf6.5566|CA3332|POL21.5f|GAG	ORF|Uncharacterized|transposable element gene	Ca21chr4_C_albicans_SC5314	680277	679360	C	CAL0003497	Predicted ORF in retrotransposon Tca4 with similarity to the Gag region encoding nucleocapsid-like protein; overlaps blocked reading frame orf19.2668.1; yeast-enriched transcript; rat catheter biofilm induced
4.52	orf19.2668.1		CA3331|POL21.53f|POL.3|IPF12159.2	blocked_reading_frame|transposable element gene	Ca21chr4_C_albicans_SC5314	680277	678838	C	CAL0120651	Region in retrotransposon Tca4 annotated in Assembly 21 as a blocked reading frame, based on comparative genome analysis; overlaps orf19.2668, which is an open reading frame similar to Gag proteins of retrotransposons
4.52	Tca4-4		TCA4	retrotransposon	Ca21chr4_C_albicans_SC5314	680847	673952	C	CAF0007337	Retrotransposon Tca4 on Chromosome 4, about 6.9 kbp member of the copia group with two ORFs similar to gag and pol, flanked by 381-bp LTRs (san elements)
4.52	san-4a		san	long_terminal_repeat	Ca21chr4_C_albicans_SC5314	680847	680467	C	CAL0121179	Long terminal repeat (LTR) associated with the transposon Tca4; about 381 bp long, 1-4 copies per genome
4.52	orf19.2667	RPF1	orf19.10184|IPF12428.1|IPF12157.3|Contig4-3083_0028|orf6.1627|orf6.5567|CA0599|IPF12428|CaO19.2667	ORF|Uncharacterized	Ca21chr4_C_albicans_SC5314	680960	681850	W	CAL0003496	Putative nucleolar protein with a predicted role in the assembly and export of the large ribosomal subunit; essential for growth; rat catheter and Spider biofilm induced
4.52	orf19.2665	MSN5	orf19.10182|IPF18929.1|IPF24579.1|IPF29005.1|IPF12426.2|Contig4-3083_0029|orf6.1628|orf6.1629|CA0601|orf19.10183|orf19.2666|CA0600|MSN5.3f	ORF|Uncharacterized	Ca21chr4_C_albicans_SC5314	682600	686337	W	CAL0003494	Predicted karyopherin involved in nuclear import and export of proteins; flow model biofilm induced; Spider biofilm induced
4.52	orf19.2664		orf19.10181|IPF24573.1|IPF16761.2|Contig4-2457_0002|orf6.1472|CA0502|orf19.67|MKT1|CaO19.10181|IPF16761|CaO19.2664	ORF|Uncharacterized	Ca21chr4_C_albicans_SC5314	686742	689441	W	CAL0003493	Protein of unknown function
4.52	orf19.1440.2			ORF|Uncharacterized	Ca21chr4_C_albicans_SC5314	690462	690280	C	CAL0120537	Protein of unknown function
4.52	orf19.1440.1			ORF|Uncharacterized	Ca21chr4_C_albicans_SC5314	692595	692395	C	CAL0120535	Protein of unknown function
4.52	orf19.1440		orf19.9015|IPF25887.1|IPF10568.1|Contig4-2265_0003|orf6.1052|CA0279|CaO19.1440|IPF10568	ORF|Uncharacterized	Ca21chr4_C_albicans_SC5314	697817	698932	W	CAL0004584	Protein of unknown function
4.52	orf19.1439	IPK1	orf19.9013|IPF25886.1|IPF10566.1|Contig4-2265_0006|orf6.1053|CA0280|IPF10566|CaO19.1439	ORF|Uncharacterized	Ca21chr4_C_albicans_SC5314	699814	700899	W	CAL0004567	Ortholog of S. cerevisiae/S. pombe Ipk1; an inositol pentakisphosphate 2-kinase, a nuclear protein required for synthesis of 1,2,3,4,5,6-hexakisphosphate; Spider biofilm induced
4.52	orf19.1438		orf19.9012|IPF19419.2|IPF10565.1|Contig4-2265_0007|orf6.1054|orf6.155|CA0281|CPD2|CaO19.1438|IPF10565|IPF10564.3	ORF|Uncharacterized	Ca21chr4_C_albicans_SC5314	702384	701161	C	CAL0004565	Protein with homology to NADH dehydrogenase; regulated by Sef1p-, Sfu1p-, and Hap43p
4.52	orf19.3362		orf19.10870|IPF23891.1|IPF15758.2|Contig4-2353_0001|orf6.1783|CaO19.3362|CaO19.10870	ORF|Uncharacterized	Ca21chr4_C_albicans_SC5314	704120	702777	C	CAL0004170	Protein of unknown function
4.52	orf19.3363	VTC4	orf19.10871|IPF16674.3|IPF15753.2|Contig4-2353_0002|orf6.1784|orf6.2574|CA0697|CaO19.3363	ORF|Uncharacterized	Ca21chr4_C_albicans_SC5314	706651	704522	C	CAL0004171	Putative polyphosphate synthetase; decreased expression in hyphae compared to yeast-form cells; fungal-specific (no human or murine homolog); virulence-group-correlated expression
4.52	orf19.3364		orf19.10872|IPF10394.1|IPF16673.2|Contig4-2353_0007|Contig4-2386_0008|orf6.1785|orf6.2575|CA1196|IPF10394|CaO19.3364	ORF|Uncharacterized	Ca21chr4_C_albicans_SC5314	707956	707498	C	CAL0004173	Protein of unknown function
4.52	orf19.3365	DAO2	orf19.10873|IPF10395.2|IPF18896.1|Contig4-2386_0006|orf6.1786|orf6.2576|CA0699|IFG2.5f|CA1197|IFG1	ORF|Uncharacterized	Ca21chr4_C_albicans_SC5314	709745	708588	C	CAL0004175	Putative D-amino acid oxidase; rat catheter biofilm induced
4.52	orf19.3366	CSH3	CaO19.3366|orf19.10874|orf6.1787|IPF23895.1|IPF10396.2|Contig4-2386_0003|orf6.2577|CA0700|SHR3	ORF|Verified	Ca21chr4_C_albicans_SC5314	710542	711252	W	CAL0004176	Functional homolog of S. cerevisiae Shr3p, which is a chaperone specific for amino acid permeases; localized to ER; required for wild-type amino-acid responsive hyphal growth and for mouse systemic virulence; regulated by Gcn2p and Gcn4p
4.52	orf19.3366.1		IPF23888.1|IPF10397.2|CA0701|IPF10397	ORF|Uncharacterized	Ca21chr4_C_albicans_SC5314	711501	712028	W	CAF0006984	Protein of unknown function; Hap43-repressed gene
4.52	orf19.3367		orf19.10875|IPF10399.1|IPF16677.2|Contig4-2386_0001|orf6.2578|orf6.2893|CA1198|MRPL22|CaO19.3367|IPF10399	ORF|Uncharacterized	Ca21chr4_C_albicans_SC5314	712422	713297	W	CAL0004177	Protein of unknown function
4.52	orf19.3368		IPF28792.1|orf6.2892|CaO19.3368	ORF|Dubious	Ca21chr4_C_albicans_SC5314	713682	713377	C	CAL0004178	Protein of unknown function
4.52	orf19.3369	MOH1	orf19.10876|IPF10404.2|IPF28786.1|Contig4-1807_0003|Contig4-2147_0004|orf6.2579|orf6.2891|CA1199|IPF10404|CaO19.3369	ORF|Uncharacterized	Ca21chr4_C_albicans_SC5314	717306	718097	W	CAL0004179	Ortholog of S. cerevisiae Moh1, essential for staionary phase growth; induced by alpha pheromone in SpiderM medium and by Mnl1 under weak acid stress; possibly essential (UAU1 method); flow model biofilm induced; Spider biofilm induced
4.52	orf19.3370	DOT4	orf19.10878|orf6.2580|IPF17685.3|IPF15624.1|Contig4-1346_0001|Contig4-1346_0002|Contig4-2147_0001|Contig4-2147_0003|orf6.2581|orf6.2890|CA1406|CaO19.3370|UBP10	ORF|Verified	Ca21chr4_C_albicans_SC5314	721235	719028	C	CAL0004185	Protein similar to ubiquitin C-terminal hydrolase; localizes to cell surface of hyphal cells, but not yeast-form cells; repressed upon high-level peroxide; Hap43p-induced; rat catheter biofilm induced
4.52	orf19.3371	JAB1	orf19.10879|IPF23892.1|IPF15627.2|Contig4-2147_0005|orf6.140|orf6.2889|CA1405|orf6.2888|orf19.10880|orf19.3372|CA1404|IPF19554.3f	ORF|Verified	Ca21chr4_C_albicans_SC5314	723842	722013	C	CAL0004187	Component of the COP9 signalosome (CSN) complex, provides catalytic activity for deneddylation that cleaves the ubiquitin-like protein tag Rub1p off the cullin (Cdc53p) molecule
4.52	orf19.3373		orf19.10881|IPF13110.3|IPF14155.1|Contig4-2242_0002|orf6.141|orf6.2887|CA1403|IPF14155|CaO19.3373|RIM4	ORF|Uncharacterized	Ca21chr4_C_albicans_SC5314	725966	724095	C	CAL0004190	Putative protein of unknown function; transcript upregulated in clinical isolates from HIV+ patients with oral candidiasis; Spider biofilm induced
4.52	orf19.3374	ECE1	orf19.10882|IPF23894.1|IPF14152.1|Contig4-2242_0004|orf6.2886|CA1402|CaO19.10882|CaO19.3374	ORF|Verified	Ca21chr4_C_albicans_SC5314	727428	726613	C	CAL0004191	Hypha-specific protein; regulated by Rfg1, Nrg1, Tup1, Cph1, Efg1, Hog1, farnesol, phagocytosis; fluconazole-induced; rat catheter and Spider biofilm induced; flow model biofilm repressed; Bcr1-repressed in RPMI a/a biofilms
4.52	orf19.3375		IPF13244.2|IPF19859.2|Contig4-2366_0006|orf6.1153|orf6.2937|CA0340|CaO19.3375|IPF19859|IPF19859.1	ORF|Uncharacterized	Ca21chr4_C_albicans_SC5314	731213	730626	C	CAL0004192	Protein of unknown function
4.52	orf19.3376		orf19.10885|IPF16001.1|IPF13247.1|Contig4-1821_0002|orf6.1152|orf6.2936|CA0339|CaO19.3376|IPF13247	ORF|Uncharacterized	Ca21chr4_C_albicans_SC5314	733784	733260	C	CAL0004193	Protein of unknown function
4.52	orf19.3378		orf19.10886|IPF16006.2|IPF13252.1|Contig4-2366_0003|orf6.1150|orf6.2935|CA0338|IPF13252|CaO19.3378	ORF|Uncharacterized	Ca21chr4_C_albicans_SC5314	735490	734939	C	CAL0004194	Protein of unknown function; regulated by Tsa1, Tsa1B in minimal media at 37 degrees C
4.52	orf19.3380	HWP2	orf19.10888|IPF23887.1|IPF14331.2|Contig4-2768_0012|Contig4-2768_0013|orf6.2933|CA1430|PGA8|CaO19.10888|IPF14331|CaO19.3380	ORF|Verified	Ca21chr4_C_albicans_SC5314	741271	738545	C	CAL0004200	GPI-anchored, glycosylated cell wall protein; required for biofilm formation, adhesion, filamentous growth on some media; expressed in hyphae; mutant delayed in virulence; regulated by Efg1, Tup1; similar to Hwp1 and Rbt1 domains
4.52	orf19.1327	RBT1	orf19.8907|IPF19252.2|IPF15385.2|orf6.4889|orf6.489|CA2830|orf19.10892|orf19.3384|orf6.2929|Contig4-2768_0006|IPF16136.1|IPF23893.1|ECE99|CaO19.1327|RBT99	ORF|Verified	Ca21chr4_C_albicans_SC5314	747433	745268	C	CAL0003763	Cell wall protein with similarity to Hwp1; required for virulence; predicted glycosylation; fluconazole, Tup1 repressed; farnesol, alpha factor, serum, hyphal and alkaline induced; Rfg1, Rim101-regulated
4.52	orf19.1326		orf19.8906|IPF26011.1|IPF14593.2|Contig4-2287_0002|orf6.4888|CA2829|IFA7|CaO19.1326|LPF13|CaO19.8906	ORF|Uncharacterized	Ca21chr4_C_albicans_SC5314	750848	752818	W	CAL0003761	Protein of unknown function
4.52	orf19.1325	ECM38	orf19.8905|IPF26013.1|IPF17026.2|orf6.4887|CA2828|IPF17026|CSA99|CaO19.1325|CaO19.8905	ORF|Uncharacterized	Ca21chr4_C_albicans_SC5314	754731	752971	C	CAL0003759	Putative gamma-glutamyltransferase; alkaline upregulated; Spider biofilm induced; possibly an essential gene, disruptants not obtained by UAU1 method
4.52	orf19.1324	RAD2	orf19.8904|IPF26007.1|IPF19770.1|orf6.4886|CA2827|CaO19.1324|RAD13|CaO19.8904	ORF|Verified	Ca21chr4_C_albicans_SC5314	755390	758362	W	CAL0003758	Ortholog of S. cerevisiae Rad2, a nucleotide excision repair nuclease; null mutant is extremely sensitive to UV irradiation; transcript induced by interaction with macrophages
4.52	orf19.1323		orf19.8903|IPF26010.1|IPF12906.2|Contig4-2436_0008|orf6.4885|CA2826|APL6|CaO19.1323|CaO19.8903	ORF|Uncharacterized	Ca21chr4_C_albicans_SC5314	758543	760858	W	CAL0003756	Phosphorylated protein of unknown function; Hap43p-repressed gene
4.52	orf19.1321	HWP1	orf19.8901|IPF26012.1|IPF12916.1|Contig4-2436_0002|orf6.4883|CA2825|ECE2|CaO19.1321|CaO19.8901	ORF|Verified	Ca21chr4_C_albicans_SC5314	762939	764843	W	CAL0003753	Hyphal cell wall protein; host transglutaminase substrate; opaque-, a-specific, alpha-factor induced; at MTLa side of conjugation tube; virulence complicated by URA3 effects; Bcr1-repressed in RPMI a/a biofilms; Spider biofilm induced
4.52	orf19.1318		CaO19.8898|CaO19.1318|orf19.8898|IPF26020.1|IPF17888.2|Contig4-1592_0002|orf6.4880|CA2824|IPF17888	ORF|Uncharacterized	Ca21chr4_C_albicans_SC5314	765747	766820	W	CAL0003733	Protein of unknown function
4.52	orf19.1317	OSH3	orf19.8897|IPF26009.1|IPF14554.2|Contig4-1592_0001|orf6.4879|CA2823|CaO19.8897|CaO19.1317|IPF14554	ORF|Verified	Ca21chr4_C_albicans_SC5314	769486	766952	C	CAL0003732	Protein required for wild-type filamentation; has oxysterol binding protein domain and pleckstrin homology motif; overproducton suppresses cph1 homozygous null filamnetation defect; similar to S. cerevisiae Osh3p
4.52	orf19.1314		orf19.8894|IPF26016.1|IPF17153.2|orf6.4876|CA2822|CaO19.1314|CaO19.8894|IPF14550	ORF|Uncharacterized	Ca21chr4_C_albicans_SC5314	772087	770678	C	CAL0003728	Protein of unknown function; planktonic growth-induced gene
4.52	tQ(UUG)1	tQ(UUG)1	tQ(UUG)1.2|tQ(TTG)1	tRNA|Uncharacterized	Ca21chr4_C_albicans_SC5314	772584	772498	C	CAF0007212	tRNA-Gln, predicted by tRNAscan-SE; UUG anticodon
4.52	orf19.1313	CDR3	orf19.8893|IPF26026.1|IPF14709.3|Contig4-1792_0002|orf6.4875|CA1545|orf19.8892|orf19.1312|orf6.3101|YPL088-1|CA2821|CDR3.3eoc|IPF17152.1|CDR3.5eoc|IPF14709.2|CaO19.1312|CaO19.8892	ORF|Verified	Ca21chr4_C_albicans_SC5314	774255	773035	C	CAL0003726	Transporter of the Pdr/Cdr family of the ATP-binding cassette superfamily; transports phospholipids out-to-in; expressed in opaque-phase cells; induced by macrophage interaction; fluconazole-repressed; Spider biofilm induced
4.52	tG(GCC)2	tG(GCC)2	tG(GCC)2.2	tRNA|Uncharacterized	Ca21chr4_C_albicans_SC5314	780375	780305	C	CAF0007161	tRNA-Gly, predicted by tRNAscan-SE; GCC anticodon
2.98	tD(GUC)4	tD(GUC)4	tD(GUC)4.2|tD(GTC)4	tRNA|Uncharacterized	Ca21chr4_C_albicans_SC5314	781118	781047	C	CAF0007142	tRNA-Asp, predicted by tRNAscan-SE; GUC anticodon
2.98	tD(GUC)3	tD(GUC)3	tD(GUC)3.2|tD(GTC)3	tRNA|Uncharacterized	Ca21chr4_C_albicans_SC5314	782574	782645	W	CAF0007141	tRNA-Asp, predicted by tRNAscan-SE; GUC anticodon
2.98	tD(GUC)2	tD(GUC)2	tD(GUC)2.2|tD(GTC)2	tRNA|Uncharacterized	Ca21chr4_C_albicans_SC5314	782729	782800	W	CAF0007140	tRNA-Asp, predicted by tRNAscan-SE; GUC anticodon
Function:	GOID	GO_term	Cluster frequency	Background frequency	Corrected P-value	False discovery rate	Gene(s) annotated to the term	Directly Annotated GOID List
	33458	GAC codon-amino acid adaptor activity	3 out of 104 genes, 2.9%	7 out of 6473 background genes, 0.1%	0.01278	0	tD(GUC)4:tD(GUC)3:tD(GUC)2	33458
	140346	phosphatidylserine flippase activity	2 out of 104 genes, 1.9%	3 out of 6473 background genes, 0.0%	0.0721	0.33	C4_03110W_A:CDR3	140346:140345:90555:42626:5524
Componet:	GOID	GO_term	Cluster frequency	Background frequency	Corrected P-value	False discovery rate	Gene(s) annotated to the term	Directly Annotated GOID List
	30446	hyphal cell wall	6 out of 104 genes, 5.8%	69 out of 6473 background genes, 1.1%	0.08491	0.42	CRH11:DOT4:ECE1:HWP2:RBT1:HWP1	131:9986:9277:5730:5634:5937:46658:30445:5576:30446

## Sheet: AMS4702
Supplementary file 4: Coding Sequences within Complex CNVs
Isolate	Chromosome
AMS4702	Chr4
CNV copy number	ORF ID	Standard Name	Alias	Feature Type	Chromosome	Start Position	Stop Position	Strand	Primary CGD ID	Description
5.75	orf19.2671		orf19.10186|IPF24612.1|IPF10564.2|Contig4-2584_0001|orf6.154|orf6.5563|CA3328|CaO19.2671|CaO19.10186|IPF10564	ORF|Uncharacterized	Ca21chr4_C_albicans_SC5314	671384	672727	W	CAL0003510	Protein with a predicted FAD-dependent pyridine nucleotide reductase domains; putative oxidoreductase; Plc1-regulated; possibly an essential gene, disruptants not obtained by UAU1 method
5.75	orf19.2670		orf19.10185|IPF12430.2|IPF12162.1|Contig4-2584_0002|orf6.1626|orf6.5564|CA3329|CaO19.2670|IPF12162|CaO19.10185	ORF|Uncharacterized	Ca21chr4_C_albicans_SC5314	673769	672894	C	CAL0003509	Protein of unknown function
5.75	san-4b		san	long_terminal_repeat	Ca21chr4_C_albicans_SC5314	674332	673952	C	CAL0121178	Long terminal repeat (LTR) associated with the transposon Tca4; about 381 bp long, 1-4 copies per genome
5.75	orf19.2669		IPF12161.2|Contig4-2757_0014|Contig4-3083_0024|orf6.5565|CA3330|CaO19.2669|POL21.3f|POL21.3	ORF|Uncharacterized|transposable element gene	Ca21chr4_C_albicans_SC5314	678707	674364	C	CAL0003498	ORF in retrotransposon Tca4; similar to Pol region of retrotransposons encoding reverse transcriptase, protease, integrase; downstream of RHD2, similar to the Gag region encoding nucleocapsid-like protein; rat catheter biofilm induced
5.75	orf19.2668	RHD2	IPF12158.1|IPF12159.2|Contig4-3083_0025|Contig4-3083_0027|orf6.5566|CA3332|POL21.5f|GAG	ORF|Uncharacterized|transposable element gene	Ca21chr4_C_albicans_SC5314	680277	679360	C	CAL0003497	Predicted ORF in retrotransposon Tca4 with similarity to the Gag region encoding nucleocapsid-like protein; overlaps blocked reading frame orf19.2668.1; yeast-enriched transcript; rat catheter biofilm induced
5.75	orf19.2668.1		CA3331|POL21.53f|POL.3|IPF12159.2	blocked_reading_frame|transposable element gene	Ca21chr4_C_albicans_SC5314	680277	678838	C	CAL0120651	Region in retrotransposon Tca4 annotated in Assembly 21 as a blocked reading frame, based on comparative genome analysis; overlaps orf19.2668, which is an open reading frame similar to Gag proteins of retrotransposons
5.75	Tca4-4		TCA4	retrotransposon	Ca21chr4_C_albicans_SC5314	680847	673952	C	CAF0007337	Retrotransposon Tca4 on Chromosome 4, about 6.9 kbp member of the copia group with two ORFs similar to gag and pol, flanked by 381-bp LTRs (san elements)
5.75	san-4a		san	long_terminal_repeat	Ca21chr4_C_albicans_SC5314	680847	680467	C	CAL0121179	Long terminal repeat (LTR) associated with the transposon Tca4; about 381 bp long, 1-4 copies per genome
5.75	orf19.2667	RPF1	orf19.10184|IPF12428.1|IPF12157.3|Contig4-3083_0028|orf6.1627|orf6.5567|CA0599|IPF12428|CaO19.2667	ORF|Uncharacterized	Ca21chr4_C_albicans_SC5314	680960	681850	W	CAL0003496	Putative nucleolar protein with a predicted role in the assembly and export of the large ribosomal subunit; essential for growth; rat catheter and Spider biofilm induced
5.75	orf19.2665	MSN5	orf19.10182|IPF18929.1|IPF24579.1|IPF29005.1|IPF12426.2|Contig4-3083_0029|orf6.1628|orf6.1629|CA0601|orf19.10183|orf19.2666|CA0600|MSN5.3f	ORF|Uncharacterized	Ca21chr4_C_albicans_SC5314	682600	686337	W	CAL0003494	Predicted karyopherin involved in nuclear import and export of proteins; flow model biofilm induced; Spider biofilm induced
5.75	orf19.2664		orf19.10181|IPF24573.1|IPF16761.2|Contig4-2457_0002|orf6.1472|CA0502|orf19.67|MKT1|CaO19.10181|IPF16761|CaO19.2664	ORF|Uncharacterized	Ca21chr4_C_albicans_SC5314	686742	689441	W	CAL0003493	Protein of unknown function
5.75	orf19.1440.2			ORF|Uncharacterized	Ca21chr4_C_albicans_SC5314	690462	690280	C	CAL0120537	Protein of unknown function
5.75	orf19.1440.1			ORF|Uncharacterized	Ca21chr4_C_albicans_SC5314	692595	692395	C	CAL0120535	Protein of unknown function
5.75	orf19.1440		orf19.9015|IPF25887.1|IPF10568.1|Contig4-2265_0003|orf6.1052|CA0279|CaO19.1440|IPF10568	ORF|Uncharacterized	Ca21chr4_C_albicans_SC5314	697817	698932	W	CAL0004584	Protein of unknown function
5.75	orf19.1439	IPK1	orf19.9013|IPF25886.1|IPF10566.1|Contig4-2265_0006|orf6.1053|CA0280|IPF10566|CaO19.1439	ORF|Uncharacterized	Ca21chr4_C_albicans_SC5314	699814	700899	W	CAL0004567	Ortholog of S. cerevisiae/S. pombe Ipk1; an inositol pentakisphosphate 2-kinase, a nuclear protein required for synthesis of 1,2,3,4,5,6-hexakisphosphate; Spider biofilm induced
5.75	orf19.1438		orf19.9012|IPF19419.2|IPF10565.1|Contig4-2265_0007|orf6.1054|orf6.155|CA0281|CPD2|CaO19.1438|IPF10565|IPF10564.3	ORF|Uncharacterized	Ca21chr4_C_albicans_SC5314	702384	701161	C	CAL0004565	Protein with homology to NADH dehydrogenase; regulated by Sef1p-, Sfu1p-, and Hap43p
5.75	orf19.3362		orf19.10870|IPF23891.1|IPF15758.2|Contig4-2353_0001|orf6.1783|CaO19.3362|CaO19.10870	ORF|Uncharacterized	Ca21chr4_C_albicans_SC5314	704120	702777	C	CAL0004170	Protein of unknown function
9.34	orf19.3363	VTC4	orf19.10871|IPF16674.3|IPF15753.2|Contig4-2353_0002|orf6.1784|orf6.2574|CA0697|CaO19.3363	ORF|Uncharacterized	Ca21chr4_C_albicans_SC5314	706651	704522	C	CAL0004171	Putative polyphosphate synthetase; decreased expression in hyphae compared to yeast-form cells; fungal-specific (no human or murine homolog); virulence-group-correlated expression
9.34	orf19.3364		orf19.10872|IPF10394.1|IPF16673.2|Contig4-2353_0007|Contig4-2386_0008|orf6.1785|orf6.2575|CA1196|IPF10394|CaO19.3364	ORF|Uncharacterized	Ca21chr4_C_albicans_SC5314	707956	707498	C	CAL0004173	Protein of unknown function
9.34	orf19.3365	DAO2	orf19.10873|IPF10395.2|IPF18896.1|Contig4-2386_0006|orf6.1786|orf6.2576|CA0699|IFG2.5f|CA1197|IFG1	ORF|Uncharacterized	Ca21chr4_C_albicans_SC5314	709745	708588	C	CAL0004175	Putative D-amino acid oxidase; rat catheter biofilm induced
9.34	orf19.3366	CSH3	CaO19.3366|orf19.10874|orf6.1787|IPF23895.1|IPF10396.2|Contig4-2386_0003|orf6.2577|CA0700|SHR3	ORF|Verified	Ca21chr4_C_albicans_SC5314	710542	711252	W	CAL0004176	Functional homolog of S. cerevisiae Shr3p, which is a chaperone specific for amino acid permeases; localized to ER; required for wild-type amino-acid responsive hyphal growth and for mouse systemic virulence; regulated by Gcn2p and Gcn4p
9.34	orf19.3366.1		IPF23888.1|IPF10397.2|CA0701|IPF10397	ORF|Uncharacterized	Ca21chr4_C_albicans_SC5314	711501	712028	W	CAF0006984	Protein of unknown function; Hap43-repressed gene
9.34	orf19.3367		orf19.10875|IPF10399.1|IPF16677.2|Contig4-2386_0001|orf6.2578|orf6.2893|CA1198|MRPL22|CaO19.3367|IPF10399	ORF|Uncharacterized	Ca21chr4_C_albicans_SC5314	712422	713297	W	CAL0004177	Protein of unknown function
9.34	orf19.3368		IPF28792.1|orf6.2892|CaO19.3368	ORF|Dubious	Ca21chr4_C_albicans_SC5314	713682	713377	C	CAL0004178	Protein of unknown function
9.34	orf19.3369	MOH1	orf19.10876|IPF10404.2|IPF28786.1|Contig4-1807_0003|Contig4-2147_0004|orf6.2579|orf6.2891|CA1199|IPF10404|CaO19.3369	ORF|Uncharacterized	Ca21chr4_C_albicans_SC5314	717306	718097	W	CAL0004179	Ortholog of S. cerevisiae Moh1, essential for staionary phase growth; induced by alpha pheromone in SpiderM medium and by Mnl1 under weak acid stress; possibly essential (UAU1 method); flow model biofilm induced; Spider biofilm induced
9.34	orf19.3370	DOT4	orf19.10878|orf6.2580|IPF17685.3|IPF15624.1|Contig4-1346_0001|Contig4-1346_0002|Contig4-2147_0001|Contig4-2147_0003|orf6.2581|orf6.2890|CA1406|CaO19.3370|UBP10	ORF|Verified	Ca21chr4_C_albicans_SC5314	721235	719028	C	CAL0004185	Protein similar to ubiquitin C-terminal hydrolase; localizes to cell surface of hyphal cells, but not yeast-form cells; repressed upon high-level peroxide; Hap43p-induced; rat catheter biofilm induced
9.34	orf19.3371	JAB1	orf19.10879|IPF23892.1|IPF15627.2|Contig4-2147_0005|orf6.140|orf6.2889|CA1405|orf6.2888|orf19.10880|orf19.3372|CA1404|IPF19554.3f	ORF|Verified	Ca21chr4_C_albicans_SC5314	723842	722013	C	CAL0004187	Component of the COP9 signalosome (CSN) complex, provides catalytic activity for deneddylation that cleaves the ubiquitin-like protein tag Rub1p off the cullin (Cdc53p) molecule
9.34	orf19.3373		orf19.10881|IPF13110.3|IPF14155.1|Contig4-2242_0002|orf6.141|orf6.2887|CA1403|IPF14155|CaO19.3373|RIM4	ORF|Uncharacterized	Ca21chr4_C_albicans_SC5314	725966	724095	C	CAL0004190	Putative protein of unknown function; transcript upregulated in clinical isolates from HIV+ patients with oral candidiasis; Spider biofilm induced
9.34	orf19.3374	ECE1	orf19.10882|IPF23894.1|IPF14152.1|Contig4-2242_0004|orf6.2886|CA1402|CaO19.10882|CaO19.3374	ORF|Verified	Ca21chr4_C_albicans_SC5314	727428	726613	C	CAL0004191	Hypha-specific protein; regulated by Rfg1, Nrg1, Tup1, Cph1, Efg1, Hog1, farnesol, phagocytosis; fluconazole-induced; rat catheter and Spider biofilm induced; flow model biofilm repressed; Bcr1-repressed in RPMI a/a biofilms
9.34	orf19.3375		IPF13244.2|IPF19859.2|Contig4-2366_0006|orf6.1153|orf6.2937|CA0340|CaO19.3375|IPF19859|IPF19859.1	ORF|Uncharacterized	Ca21chr4_C_albicans_SC5314	731213	730626	C	CAL0004192	Protein of unknown function
9.34	orf19.3376		orf19.10885|IPF16001.1|IPF13247.1|Contig4-1821_0002|orf6.1152|orf6.2936|CA0339|CaO19.3376|IPF13247	ORF|Uncharacterized	Ca21chr4_C_albicans_SC5314	733784	733260	C	CAL0004193	Protein of unknown function
9.34	orf19.3378		orf19.10886|IPF16006.2|IPF13252.1|Contig4-2366_0003|orf6.1150|orf6.2935|CA0338|IPF13252|CaO19.3378	ORF|Uncharacterized	Ca21chr4_C_albicans_SC5314	735490	734939	C	CAL0004194	Protein of unknown function; regulated by Tsa1, Tsa1B in minimal media at 37 degrees C
9.34	orf19.3380	HWP2	orf19.10888|IPF23887.1|IPF14331.2|Contig4-2768_0012|Contig4-2768_0013|orf6.2933|CA1430|PGA8|CaO19.10888|IPF14331|CaO19.3380	ORF|Verified	Ca21chr4_C_albicans_SC5314	741271	738545	C	CAL0004200	GPI-anchored, glycosylated cell wall protein; required for biofilm formation, adhesion, filamentous growth on some media; expressed in hyphae; mutant delayed in virulence; regulated by Efg1, Tup1; similar to Hwp1 and Rbt1 domains
9.34	orf19.1327	RBT1	orf19.8907|IPF19252.2|IPF15385.2|orf6.4889|orf6.489|CA2830|orf19.10892|orf19.3384|orf6.2929|Contig4-2768_0006|IPF16136.1|IPF23893.1|ECE99|CaO19.1327|RBT99	ORF|Verified	Ca21chr4_C_albicans_SC5314	747433	745268	C	CAL0003763	Cell wall protein with similarity to Hwp1; required for virulence; predicted glycosylation; fluconazole, Tup1 repressed; farnesol, alpha factor, serum, hyphal and alkaline induced; Rfg1, Rim101-regulated
9.34	orf19.1326		orf19.8906|IPF26011.1|IPF14593.2|Contig4-2287_0002|orf6.4888|CA2829|IFA7|CaO19.1326|LPF13|CaO19.8906	ORF|Uncharacterized	Ca21chr4_C_albicans_SC5314	750848	752818	W	CAL0003761	Protein of unknown function
9.34	orf19.1325	ECM38	orf19.8905|IPF26013.1|IPF17026.2|orf6.4887|CA2828|IPF17026|CSA99|CaO19.1325|CaO19.8905	ORF|Uncharacterized	Ca21chr4_C_albicans_SC5314	754731	752971	C	CAL0003759	Putative gamma-glutamyltransferase; alkaline upregulated; Spider biofilm induced; possibly an essential gene, disruptants not obtained by UAU1 method
9.34	orf19.1324	RAD2	orf19.8904|IPF26007.1|IPF19770.1|orf6.4886|CA2827|CaO19.1324|RAD13|CaO19.8904	ORF|Verified	Ca21chr4_C_albicans_SC5314	755390	758362	W	CAL0003758	Ortholog of S. cerevisiae Rad2, a nucleotide excision repair nuclease; null mutant is extremely sensitive to UV irradiation; transcript induced by interaction with macrophages
9.34	orf19.1323		orf19.8903|IPF26010.1|IPF12906.2|Contig4-2436_0008|orf6.4885|CA2826|APL6|CaO19.1323|CaO19.8903	ORF|Uncharacterized	Ca21chr4_C_albicans_SC5314	758543	760858	W	CAL0003756	Phosphorylated protein of unknown function; Hap43p-repressed gene
9.34	orf19.1321	HWP1	orf19.8901|IPF26012.1|IPF12916.1|Contig4-2436_0002|orf6.4883|CA2825|ECE2|CaO19.1321|CaO19.8901	ORF|Verified	Ca21chr4_C_albicans_SC5314	762939	764843	W	CAL0003753	Hyphal cell wall protein; host transglutaminase substrate; opaque-, a-specific, alpha-factor induced; at MTLa side of conjugation tube; virulence complicated by URA3 effects; Bcr1-repressed in RPMI a/a biofilms; Spider biofilm induced
9.34	orf19.1318		CaO19.8898|CaO19.1318|orf19.8898|IPF26020.1|IPF17888.2|Contig4-1592_0002|orf6.4880|CA2824|IPF17888	ORF|Uncharacterized	Ca21chr4_C_albicans_SC5314	765747	766820	W	CAL0003733	Protein of unknown function
9.34	orf19.1317	OSH3	orf19.8897|IPF26009.1|IPF14554.2|Contig4-1592_0001|orf6.4879|CA2823|CaO19.8897|CaO19.1317|IPF14554	ORF|Verified	Ca21chr4_C_albicans_SC5314	769486	766952	C	CAL0003732	Protein required for wild-type filamentation; has oxysterol binding protein domain and pleckstrin homology motif; overproducton suppresses cph1 homozygous null filamnetation defect; similar to S. cerevisiae Osh3p
9.34	orf19.1314		orf19.8894|IPF26016.1|IPF17153.2|orf6.4876|CA2822|CaO19.1314|CaO19.8894|IPF14550	ORF|Uncharacterized	Ca21chr4_C_albicans_SC5314	772087	770678	C	CAL0003728	Protein of unknown function; planktonic growth-induced gene
9.34	tQ(UUG)1	tQ(UUG)1	tQ(UUG)1.2|tQ(TTG)1	tRNA|Uncharacterized	Ca21chr4_C_albicans_SC5314	772584	772498	C	CAF0007212	tRNA-Gln, predicted by tRNAscan-SE; UUG anticodon
9.34	orf19.1313	CDR3	orf19.8893|IPF26026.1|IPF14709.3|Contig4-1792_0002|orf6.4875|CA1545|orf19.8892|orf19.1312|orf6.3101|YPL088-1|CA2821|CDR3.3eoc|IPF17152.1|CDR3.5eoc|IPF14709.2|CaO19.1312|CaO19.8892	ORF|Verified	Ca21chr4_C_albicans_SC5314	774255	773035	C	CAL0003726	Transporter of the Pdr/Cdr family of the ATP-binding cassette superfamily; transports phospholipids out-to-in; expressed in opaque-phase cells; induced by macrophage interaction; fluconazole-repressed; Spider biofilm induced
9.34	tG(GCC)2	tG(GCC)2	tG(GCC)2.2	tRNA|Uncharacterized	Ca21chr4_C_albicans_SC5314	780375	780305	C	CAF0007161	tRNA-Gly, predicted by tRNAscan-SE; GCC anticodon
9.34	tD(GUC)4	tD(GUC)4	tD(GUC)4.2|tD(GTC)4	tRNA|Uncharacterized	Ca21chr4_C_albicans_SC5314	781118	781047	C	CAF0007142	tRNA-Asp, predicted by tRNAscan-SE; GUC anticodon
9.34	tD(GUC)3	tD(GUC)3	tD(GUC)3.2|tD(GTC)3	tRNA|Uncharacterized	Ca21chr4_C_albicans_SC5314	782574	782645	W	CAF0007141	tRNA-Asp, predicted by tRNAscan-SE; GUC anticodon
9.34	tD(GUC)2	tD(GUC)2	tD(GUC)2.2|tD(GTC)2	tRNA|Uncharacterized	Ca21chr4_C_albicans_SC5314	782729	782800	W	CAF0007140	tRNA-Asp, predicted by tRNAscan-SE; GUC anticodon
9.34	orf19.1311	SPO75	orf19.8891|IPF6671.2|IPF29492.1|Contig4-2805_0006|orf6.3102|CA1546|IPF6671|CaO19.8891|CaO19.1311	ORF|Uncharacterized	Ca21chr4_C_albicans_SC5314	782925	785510	W	CAL0003722	Protein of unknown function
9.34	orf19.1310		orf19.8890|IPF6672.2|IPF18706.2|orf6.2770|orf6.3103|CA1547|CaO19.1310|IPF6672	ORF|Uncharacterized	Ca21chr4_C_albicans_SC5314	787132	785501	C	CAL0003720	Protein of unknown function
9.34	orf19.1309		orf19.8889|IPF6673.1|IPF6675.2|Contig4-2324_0006|orf6.2771|orf6.3104|CA1323|CaO19.1309|IPF6675	ORF|Uncharacterized	Ca21chr4_C_albicans_SC5314	787968	787555	C	CAL0003711	Protein of unknown function
9.34	orf19.1308		orf19.8888|IPF18658.2|IPF6676.2|Contig4-2324_0003|orf6.2772|orf6.3105|CA1324|IPF6676|FNX1|CaO19.1308	ORF|Uncharacterized	Ca21chr4_C_albicans_SC5314	788714	790459	W	CAL0003710	Predicted membrane transporter, member of the drug:proton antiporter (14 spanner) (DHA2) family, major facilitator superfamily (MFS)
9.34	orf19.1307		orf19.8887|IPF26015.1|IPF6678.2|Contig4-2324_0002|orf6.2773|CA1325|CaO19.1307|CaO19.8887|IPF6678	ORF|Uncharacterized	Ca21chr4_C_albicans_SC5314	792025	790523	C	CAL0003709	Predicted membrane protein; rat catheter biofilm induced
9.34	orf19.1306		orf19.8886|IPF26019.1|IPF6679.1|orf6.2774|CA1326|CaO19.8886|IPF6679|CaO19.1306	ORF|Uncharacterized	Ca21chr4_C_albicans_SC5314	793544	792534	C	CAL0003707	Protein of unknown function
9.34	orf19.1305		orf19.8885|IPF26017.1|IPF6680.2|Contig4-1569_0002|Contig4-2781_0001|orf6.2775|CA1327|CaO19.1305|CaO19.8885|IPF6680	ORF|Uncharacterized	Ca21chr4_C_albicans_SC5314	795450	794101	C	CAL0003706	Protein of unknown function
9.34	orf19.1304		orf19.8884|IPF6681.3|IPF6682.2|Contig4-2781_0003|orf6.2776|CA1328|CaO19.1304|RRP4|CaO19.8884	ORF|Uncharacterized	Ca21chr4_C_albicans_SC5314	795663	796577	W	CAL0003704	Protein of unknown function
9.34	orf19.1303		CaO19.1303|MRF1|orf19.8883|IPF19627.2|IPF19626.1|Contig4-2781_0004|Contig4-2781_0005|Contig4-2781_0008|orf6.1384|orf6.2777|CA1329|MRF2	ORF|Uncharacterized	Ca21chr4_C_albicans_SC5314	797872	796688	C	CAL0003702	Protein of unknown function
9.34	orf19.1302		orf19.8882|IPF13556.2|IPF29496.1|Contig4-2781_0010|orf6.1385|orf6.2778|CA0451|CaO19.1302|IPF13556	ORF|Uncharacterized	Ca21chr4_C_albicans_SC5314	798828	799478	W	CAL0003700	Protein of unknown function
9.34	orf19.1301		orf19.8881|IPF13554.1|IPF18704.2|Contig4-2781_0016|orf6.1386|CA0452|IPF13554|CaO19.1301	ORF|Uncharacterized	Ca21chr4_C_albicans_SC5314	800217	800711	W	CAL0003699	Protein of unknown function
9.34	orf19.1300		orf19.8880|IPF13552.2|IPF29494.1|Contig4-2781_0017|orf6.1387|CA0453|IPF13552|CaO19.1300	ORF|Verified	Ca21chr4_C_albicans_SC5314	802162	800828	C	CAL0003697	Putative mitochondrial membrane protein; homozygous transposon insertion causes decreased colony wrinkling under filamentous growth-inducing conditions, but does not block true hyphal formation in liquid media
9.34	orf19.1299	RPN6	orf19.8879|IPF13551.2|IPF29495.1|Contig4-2781_0018|orf6.1388|CA0454|CaO19.1299	ORF|Uncharacterized	Ca21chr4_C_albicans_SC5314	802437	803744	W	CAL0003109	Putative 26S proteasome subunit; Hap43p-induced gene; regulated by Gcn2p and Gcn4p
9.34	orf19.1298	NUP84	orf19.8878|IPF26014.1|IPF16027.3|Contig4-2781_0019|Contig4-2781_0020|Contig4-2781_0021|orf6.1389|orf6.923|CA0225|IPF16027.2|CaO19.1298	ORF|Uncharacterized	Ca21chr4_C_albicans_SC5314	806316	803782	C	CAL0003108	Protein of unknown function
9.34	orf19.1297		orf19.8877|IPF26018.1|IPF16024.1|Contig4-2781_0024|orf6.924|CA0226|orf19.12503|orf19.5036|orf6.3313|CA1692|IPF17055.1|IPF22191.1|ATG20|CaO19.1297|CaO19.8877|IPF16024	ORF|Uncharacterized	Ca21chr4_C_albicans_SC5314	807452	809647	W	CAL0003107	Protein of unknown function
9.34	orf19.5037	HRQ2	orf19.12504|IPF17054|IPF22188.1|IPF17054.2|orf6.3314|CA1693|CaO19.5037|CaO19.12504	ORF|Uncharacterized	Ca21chr4_C_albicans_SC5314	810963	809695	C	CAL0001647	Protein of unknown function; mutants are viable; rat catheter and Spider biofilm induced
9.34	orf19.5038		orf19.12505|IPF22196.1|IPF12305.2|orf6.3315|CA1694|TRM3|CaO19.12505|CaO19.5038	ORF|Uncharacterized	Ca21chr4_C_albicans_SC5314	812074	816396	W	CAL0001648	Predicted tRNA (guanine) methyltransferase activity; Spider biofilm induced
9.34	orf19.5039	RRP42	CaO19.12506|orf19.12506|IPF22190.1|IPF12306.1|Contig4-2272_0001|Contig4-2272_0002|orf6.3316|CA1695|CaO19.5039	ORF|Uncharacterized	Ca21chr4_C_albicans_SC5314	817412	816489	C	CAL0001650	Putative exosome non-catalytic core component; involved in 3'-5' RNA processing; rat catheter biofilm induced
9.34	orf19.5040		orf19.12507|IPF22186.1|IPF12310.2|Contig4-2272_0003|orf6.3317|CA1696|CaO19.12507|CaO19.5040|ASM4	ORF|Uncharacterized	Ca21chr4_C_albicans_SC5314	818048	819826	W	CAL0001665	Protein of unknown function
9.34	orf19.5041		orf19.12508|IPF22189.1|IPF19742.1|Contig4-2272_0004|orf6.3318|CA6218|CaO19.12508|CaO19.5041|IPF19742	ORF|Uncharacterized	Ca21chr4_C_albicans_SC5314	821011	819938	C	CAL0001666	Protein of unknown function
9.34	orf19.5042		orf19.12509|IPF22193.1|IPF16759.2|Contig4-2272_0004|orf6.3319|CaO19.12509|CaO19.5042	ORF|Uncharacterized	Ca21chr4_C_albicans_SC5314	821859	821221	C	CAL0001667	Protein of unknown function
9.34	orf19.5043		orf19.12510|IPF17702.3|IPF16758.1|Contig4-1448_0002|Contig4-2272_0007|Contig4-2272_0008|orf6.3320|orf6.429|CA1697|CaO19.5043|IPF16758	ORF|Uncharacterized	Ca21chr4_C_albicans_SC5314	822239	823705	W	CAL0001668	Protein of unknown function
9.34	orf19.5045	PTP2	orf19.12512|IPF22192.1|IPF19279.2|IPF18627.1|IPF15681.2|Contig4-2568_0005|orf6.3322|orf6.427|CA1698|IPF15681	ORF|Verified	Ca21chr4_C_albicans_SC5314	826204	828471	W	CAL0001669	Predicted protein tyrosine phosphatase; involved in regulation of MAP kinase Hog1 activity; induced by Mnl1 under weak acid stress; rat catheter and Spider biofilm induced
9.34	orf19.5046	RAM1	orf19.12513|IPF22187.1|IPF19534.2|Contig4-2773_0012|orf6.3323|CA1700|RAM1.5f|CA1699|RAM1.3f|IPF19535.1|IPF19534.1|CaO19.5046	ORF|Uncharacterized	Ca21chr4_C_albicans_SC5314	830511	828754	C	CAL0001670	Protein that acts in prenylation; transcription is alpha-factor induced; regulated in response to lovastatin and fluconazole; Hap43p-repressed gene
9.34	orf19.1596	FGR28	CaO19.1596|LPF17|orf19.9164|IPF17205.1|IPF15031.1|Contig4-1965_0001|Contig4-1965_0002|orf6.1082|orf6.426|CA0296|IFA11|CA0075|IFA24.3	ORF|Verified	Ca21chr4_C_albicans_SC5314	832750	834546	W	CAL0005683	Protein lacking an ortholog in S. cerevisiae; transposon mutation affects filamentous growth; possibly an essential gene, disruptants not obtained by UAU1 method
9.34	orf19.1595		orf19.9163|IPF25734.1|IPF15033.2|Contig4-1965_0005|orf6.1081|CA0295|IPF15033.5eoc|IPF15033	ORF|Uncharacterized	Ca21chr4_C_albicans_SC5314	835182	836888	W	CAL0005682	Protein of unknown function
9.34	orf19.789.1			ORF|Uncharacterized	Ca21chr4_C_albicans_SC5314	837428	836988	C	CAF0007416	Protein of unknown function
9.34	orf19.789	PYC2	orf19.8408|IPF26382.1|IPF26504.1|IPF15163.2|IPF15167.2|Contig4-3027_0007|orf6.2989|CA1464|PYC2.3f|PYC2.exon2	ORF|Uncharacterized	Ca21chr4_C_albicans_SC5314	841339	837806	C	CAL0001995	Putative pyruvate carboxylase; binds biotin cofactor; repressed by Ssk1 response regulator, by benomyl treatment, or in an azole-resistant strain overexpressing MDR1; stationary phase enriched protein; flow model biofilm repressed
9.34	orf19.787		orf19.8406|IPF26483.1|IPF29675.1|orf6.558|CaO19.787|CaO19.8406	ORF|Uncharacterized	Ca21chr4_C_albicans_SC5314	844921	844616	C	CAL0001990	Protein of unknown function
9.34	orf19.787.1		CA1463|PYC2.5f	ORF|Uncharacterized	Ca21chr4_C_albicans_SC5314	845676	845891	W	CAL0120975	Protein of unknown function; ORF added to Assembly 21 based on comparative genome analysis; protein detected by mass spec in stationary phase cultures
5.84	orf19.1207		IPF27537.1|Contig4-2606_0009|orf6.840|CaO19.1207	ORF|Dubious	Ca21chr4_C_albicans_SC5314	847295	847627	W	CAL0002771	Protein of unknown function
5.84	RB2-4a			repeat_region	Ca21chr4_C_albicans_SC5314	847475	851215	W	CAL0121266	Repeat sequence RB2 on Chromosome 4 (partial); RB2 units are part of the Major Repeat Sequence (MRS) found on most chromosomes; may serve as recombination hotspots
5.84	orf19.1208		IPF19849.1|Contig4-3026_0002|orf6.841	ORF|Uncharacterized	Ca21chr4_C_albicans_SC5314	850833	849772	C	CAL0002772	Predicted ORF in the Major Repeat Sequence on chromosome 4; member of a family encoded by FGR6-related genes in the RB2 repeat sequence
5.84	orf19.5312	MET4	orf19.12772|IPF21855.1|IPF8210.1|Contig4-2503_0001|orf6.8301|CA5480|CaO19.12772|IPF8210|CaO19.5312	ORF|Verified	Ca21chr4_C_albicans_SC5314	854134	855291	W	CAL0004261	Putative transcription coactivator; predicted role in sulfur amino acid metabolism; required for yeast cell adherence to silicone substrate; Spider biofilm induced
5.84	orf19.5311		orf19.12771|IPF21821.1|IPF8205.1|Contig4-2503_0005|Contig4-2961_0001|Contig4-2961_0031|orf6.8300|CA5479|CaO19.12771|IPF8205|CaO19.5311	ORF|Uncharacterized	Ca21chr4_C_albicans_SC5314	858597	861125	W	CAL0004260	Protein of unknown function
5.84	orf19.5308		CaO19.12768|CaO19.5308|orf19.12768|IPF21894.1|IPF8200.1|Contig4-2961_0002|orf6.8297	ORF|Uncharacterized	Ca21chr4_C_albicans_SC5314	861810	861382	C	CAL0004250	Protein of unknown function; induced by Rgt1
5.84	orf19.5307	JEN2	orf19.12767|IPF8196.1|IPF8525.2|Contig4-2961_0006|orf6.8296|orf6.991|CA5478|CaO19.5307	ORF|Verified	Ca21chr4_C_albicans_SC5314	864845	866386	W	CAL0004249	Dicarboxylic acid transporter; regulated by glucose repression; induced by Rgt1; disruptants not obtained by UAU1 method; rat catheter and Spider biofilm induced
5.84	orf19.5306		orf19.12766|IPF18101.1|IPF8526.1|Contig4-2961_0007|orf6.8295|orf6.990|CA5477|IPF18101|CaO19.5306	ORF|Uncharacterized	Ca21chr4_C_albicans_SC5314	866890	867306	W	CAL0004248	Protein of unknown function
5.84	orf19.5305	RHD3	LDG7|orf19.12765|orf6.8294|IPF21875.1|IPF8527.1|Contig4-2961_0009|CA5476|PGA29|CaO19.5305|IPF8527|CaO19.12765	ORF|Verified	Ca21chr4_C_albicans_SC5314	868407	867793	C	CAL0004247	GPI-anchored yeast-associated cell wall protein; induced in high iron; clade-associated gene expression; not essential for cell wall integrity; fluconazole-repressed; flow model and Spider biofilm repressed
5.84	orf19.5304		orf19.12764|IPF21881.1|IPF8528.1|Contig4-2961_0010|orf6.8293|CaO19.5304|CaO19.12764	ORF|Dubious	Ca21chr4_C_albicans_SC5314	869238	869603	W	CAL0004246	Protein of unknown function
5.84	orf19.5303	PGA30	CaO19.5303|LDG6|orf19.12763|IPF21868.1|IPF8532.2|Contig4-2961_0012|orf6.8292|CA5475|CaO19.12763|IPF8532	ORF|Verified	Ca21chr4_C_albicans_SC5314	872010	871177	C	CAL0004245	GPI-anchored protein of cell wall
5.84	orf19.5302	PGA31	orf19.12761|IPF21866.1|IPF8535.2|Contig4-2961_0018|orf6.3932|orf6.8290|CA2156|CaO19.5302|LDG5|IPF8535	ORF|Verified	Ca21chr4_C_albicans_SC5314	875200	874142	C	CAL0004244	Cell wall protein; putative GPI anchor; expression regulated upon white-opaque switch; induced by Congo Red and cell wall regeneration; Bcr1-repressed in RPMI a/a biofilms
5.84	orf19.5300		orf19.12759|IPF18102.2|IPF8537.2|Contig4-2961_0019|Contig4-2961_0020|Contig4-2961_0021|orf6.3934|orf6.8288|CA2157|CaO19.5300|CNE1|IPF8537	ORF|Uncharacterized	Ca21chr4_C_albicans_SC5314	878564	876819	C	CAL0004243	Calnexin; integral membrane ER chaperone involved in folding and quality control of glycoproteins; caspofungin induced
5.84	orf19.5299	ECM1	CaO19.5299|orf19.12758|IPF21887.1|IPF8538.2|Contig4-2961_0022|orf6.3935|CA2158	ORF|Uncharacterized	Ca21chr4_C_albicans_SC5314	879516	878923	C	CAL0003683	Putative pre-ribosomal factor; decreased mRNA abundance observed in cyr1 homozygous mutant hyphae; induced by heavy metal (cadmium) stress; Hog1p regulated
5.84	orf19.5299.1		calb_CGOB_00016	ORF|Uncharacterized	Ca21chr4_C_albicans_SC5314	880443	880580	W	CAL0000158783	Protein of unknown function
5.84	orf19.5297		orf19.12756|IPF21837.1|IPF19753.1|Contig4-2961_0028|Contig4-2961_0029|orf6.3937|CA2159|IPF19753|CaO19.5297|TFB1|CaO19.12756	ORF|Uncharacterized	Ca21chr4_C_albicans_SC5314	882641	880749	C	CAL0003682	Protein of unknown function
5.84	orf19.5296		FMP35|CaO19.12755|orf19.12755|IPF21874.1|IPF15664.2|orf6.3938|CA2160|CaO19.5296|IPF15664	ORF|Uncharacterized	Ca21chr4_C_albicans_SC5314	882980	883642	W	CAL0003681	Protein of unknown function
5.84	orf19.5295		orf19.12754|IPF21854.1|IPF11876.2|Contig4-2497_0007|orf6.3939|CA2161|CaO19.5295|CaO19.12754|EEP1|IPF11876	ORF|Uncharacterized	Ca21chr4_C_albicans_SC5314	884228	885319	W	CAL0003679	Protein with a predicted endonuclease/exonuclease/phosphatase family domain and a carbon catabolite repressor protein 4 domain; induced by alpha pheromone in SpiderM medium
5.84	orf19.5294	PDB1	orf19.12753|IPF21857.1|IPF11877.2|Contig4-2497_0006|orf6.3940|CA2162|CaO19.12753|CaO19.5294	ORF|Uncharacterized	Ca21chr4_C_albicans_SC5314	886701	885562	C	CAL0003677	Putative pyruvate dehydrogenase; fluconazole-induced; protein level decreases in stationary phase cultures; Spider biofilm repressed
5.84	orf19.5293		orf19.12751|IPF19472.2|IPF11879.2|Contig4-2497_0003|Contig4-2497_0004|orf6.35|orf6.3941|CA2163|ACT2|CaO19.5293|IPF11879|CaO19.12751	ORF|Uncharacterized	Ca21chr4_C_albicans_SC5314	888375	889898	W	CAL0003675	Protein of unknown function
5.84	orf19.5292	AXL2	CaO19.12750|orf19.12750|IPF21817.1|IPF11881.2|Contig4-2497_0002|orf6.3942|CA2164|CaO19.5292	ORF|Uncharacterized	Ca21chr4_C_albicans_SC5314	893170	890369	C	CAL0003673	Ortholog of S. cerevisiae Axl2; a plasma membrane protein involved in determination of budding pattern; O-glycosylated by Pmt4; mutant is viable
5.84	orf19.5291		orf19.12749|IPF21862.1|IPF17024.2|Contig4-2598_0011|orf6.3943|CA2165|CaO19.12749|CaO19.5291|SCS3|IPF17024	ORF|Uncharacterized	Ca21chr4_C_albicans_SC5314	896739	895777	C	CAL0003671	Protein of unknown function
5.84	orf19.5290		orf19.12748|orf6.3944|IPF21848.1|IPF17022.3|CaO19.5290|CaO19.12748	ORF|Uncharacterized	Ca21chr4_C_albicans_SC5314	898541	897198	C	CAL0003669	Protein of unknown function; repressed by Sfu1; Hap43-induced gene
Function:	GOID	GO_term	Cluster frequency	Background frequency	Corrected P-value	False discovery rate	Gene(s) annotated to the term	Directly Annotated GOID List
	33458	GAC codon-amino acid adaptor activity	3 out of 96 genes, 3.1%	7 out of 6473 background genes, 0.1%	0.00731	0.06	tD(GUC)4:tD(GUC)3:tD(GUC)2	33458
Componet:	GOID	GO_term	Cluster frequency	Background frequency	Corrected P-value	False discovery rate	Gene(s) annotated to the term	Directly Annotated GOID List
	30446	hyphal cell wall	7 out of 96 genes, 7.3%	69 out of 6473 background genes, 1.1%	0.0058	0	DOT4:ECE1:HWP2:RBT1:HWP1:RHD3:PGA30	9986:9277:16020:5730:5634:5937:46658:30445:5576:30446

## Sheet: AMS3051
Supplementary file 4: Coding Sequences within Complex CNVs
Isolate	Chromosome
AMS3051	Chr3
CNV copy number	ORF ID	Standard Name	Alias	Feature Type	Chromosome	Start Position	Stop Position	Strand	Primary CGD ID	Description
8.95	orf19.279		orf19.7911|IPF27060.1|IPF19768.1|orf6.4808|CA2779|CaO19.279|CaO19.7911|IPF3836	ORF|Uncharacterized	Ca21chr3_C_albicans_SC5314	621867	622277	W	CAL0004075	Protein with a predicted D-Tyr-tRNA(Tyr) deacylase domain; Hap43-repressed gene
8.95	orf19.280		orf19.7912|IPF19669.1|Contig4-3050_0012|orf6.4297|orf6.4809|CaO19.7912|CaO19.280	ORF|Uncharacterized	Ca21chr3_C_albicans_SC5314	622788	622378	C	CAL0004079	Protein of unknown function
8.95	orf19.281		CaO19.7913|orf19.7913|IPF27023.1|IPF3798.2|orf6.4810|CA2780|CaO19.281|IPF3831	ORF|Uncharacterized	Ca21chr3_C_albicans_SC5314	623047	624144	W	CAL0004081	Protein of unknown function
8.95	orf19.284		orf19.7916|IPF27036.1|IPF3805.2|orf6.4813|CA2781|IPF3821|CaO19.7916|CaO19.284	ORF|Uncharacterized	Ca21chr3_C_albicans_SC5314	624286	624942	W	CAL0004085	Protein of unknown function
8.95	orf19.285		orf19.7917|IPF27074.1|IPF3806.1|Contig4-3050_0029|orf6.4814|CA2782|CaO19.285|IPF3806|CaO19.7917	ORF|Uncharacterized	Ca21chr3_C_albicans_SC5314	625192	625581	W	CAL0004087	Ortholog of S. cerevisiae Igo2; role in mRNA stabilization of mRNA; Spider biofilm induced
8.95	orf19.286		orf19.7918|IPF27054.1|IPF3808.1|IPF3808|Contig4-3050_0026|orf6.4815|CA2783|ATG10|CaO19.7918|CaO19.286	ORF|Uncharacterized	Ca21chr3_C_albicans_SC5314	626059	626592	W	CAL0004090	Has a predicted autophagy-related protein domain; transcription repressed by fluphenazine treatment
8.95	orf19.287		CaO19.287|CaO19.7919|orf19.7919|IPF27050.1|IPF3810.1|Contig4-3050_0025|orf6.4816|CA2784|IPF3810	ORF|Verified	Ca21chr3_C_albicans_SC5314	627207	626623	C	CAL0004094	Putative NADH-ubiquinone oxidoreductase subunit; Hap43p-repressed gene; repressed by nitric oxide; identified in detergent-resistant membrane fraction (possible lipid raft component)
8.95	orf19.288	MET13	orf19.7920|IPF26987.1|IPF3814.2|Contig4-3050_0022|orf6.4817|CA2785|CaO19.288|CaO19.7920	ORF|Uncharacterized	Ca21chr3_C_albicans_SC5314	630027	628183	C	CAL0004097	Putative methionine biosynthesis protein; ketoconazole-induced; amphotericin B repressed; Spider biofilm repressed
8.95	orf19.290	KRE5	orf19.7922|IPF27067.1|IPF3818.3|Contig4-3050_0020|orf6.4303|orf6.4819|CA2786|GPT1|CaO19.290|KRE5.3eoc|IPF3818.2	ORF|Verified	Ca21chr3_C_albicans_SC5314	634857	630514	C	CAL0004102	UDP-glucose:glycoprotein glucosyltransferase; 1,6-beta-D-glucan biosynthesis, hyphal growth, virulence in mouse IV model; partially complements S. cerevisiae kre5 mutant defects; flow biofilm repressed, Bcr1-repressed in RPMI a/a biofilms
8.95	orf19.291		orf19.7923|IPF27029.1|IPF19948.1|Contig4-3050_0016|Contig4-3050_0017|orf6.4302|CA2409|CaO19.291|CaO19.7923|IPF19948	ORF|Uncharacterized	Ca21chr3_C_albicans_SC5314	635962	635042	C	CAL0004104	Protein of unknown function
8.95	orf19.292		orf19.7924|IPF27038.1|IPF3821.1|orf6.4301|CaO19.7924|CaO19.292	ORF|Uncharacterized	Ca21chr3_C_albicans_SC5314	636894	636238	C	CAL0004106	Protein of unknown function
8.95	orf19.295		orf19.7927|IPF27021.1|IPF3831.1|Contig4-3050_0013|orf6.4298|CaO19.295|CaO19.7927	ORF|Uncharacterized	Ca21chr3_C_albicans_SC5314	638133	637036	C	CAL0004111	Protein of unknown function
8.95	orf19.296		orf19.7928|IPF27058.1|IPF3833.1|CA2408|IPF3833|orf6.4297|CaO19.296|CaO19.7928	ORF|Uncharacterized	Ca21chr3_C_albicans_SC5314	638390	638800	W	CAL0004116	Protein of unknown function
8.95	orf19.297	DTD2	CaO19.7929|orf19.7929|IPF27061.1|IPF3836.2|Contig4-3050_0011|orf6.4296|CaO19.297	ORF|Uncharacterized	Ca21chr3_C_albicans_SC5314	639473	638901	C	CAL0004118	Protein of unknown function
14.29	orf19.299	ECM14	orf19.7931|IPF27014.1|IPF3838.2|Contig4-3050_0009|orf6.4294|CA2407|CaO19.299|CaO19.7931	ORF|Uncharacterized	Ca21chr3_C_albicans_SC5314	641122	639710	C	CAL0004123	Protein of unknown function
14.29	orf19.300	AIP2	orf19.7932|orf19.7933|IPF26999.1|IPF3840.1|Contig4-3050_0007|orf6.4293|CA2406|CaO19.300|DLD2|CaO19.7932	ORF|Uncharacterized	Ca21chr3_C_albicans_SC5314	641879	643462	W	CAL0004623	Putative actin interacting protein; regulated by Gcn4; induced in response to amino acid starvation (3-AT); repressed by elevated CO2; flow model biofilm repressed
14.29	orf19.301	PGA18	orf19.7933|IPF26975.1|IPF3844.2|Contig4-3050_0006|orf6.4292|CA2405|CaO19.301|IPF3844|CaO19.7933	ORF|Uncharacterized	Ca21chr3_C_albicans_SC5314	646393	644132	C	CAL0004624	Putative GPI-anchored protein; regulated by Nrg1, Tup1; rat catheter biofilm repressed
14.29	orf19.302		BET5|CaO19.302|orf19.7934|IPF27043.1|IPF1468.1|Contig4-2823_0003|orf6.4440|CA2508|CaO19.7934	ORF|Uncharacterized	Ca21chr3_C_albicans_SC5314	651673	652155	W	CAL0004625	Protein of unknown function
14.29	orf19.304		orf19.7936|IPF26998.1|IPF1471.2|Contig4-2823_0004|orf6.4442|CA2509|CaO19.7936|IPF1471|CaO19.304	ORF|Uncharacterized	Ca21chr3_C_albicans_SC5314	652873	654390	W	CAL0004626	Putative transporter similar to MDR proteins; fungal-specific; Spider biofilm induced
14.29	orf19.305		orf19.7937|IPF27019.1|IPF1472.2|Contig4-2823_0007|orf6.4443|CA2510|CaO19.305|CaO19.7937|IPF1472	ORF|Uncharacterized	Ca21chr3_C_albicans_SC5314	654605	655855	W	CAL0004628	Protein of unknown function; upregulated in a cyr1 null mutant
14.29	orf19.306	USO5	orf19.7938|IPF26986.1|IPF1474.2|Contig4-2823_0010|orf6.4444|CA2511|ABPD|CaO19.306|CaO19.7938|IPF1474	ORF|Uncharacterized	Ca21chr3_C_albicans_SC5314	656184	658043	W	CAL0004630	Putative type II myosin heavy chain; transcription is induced upon filamentous growth and in response to alpha pheromone in SpiderM medium
14.29	orf19.307		HFI1|CaO19.307|orf19.7939|IPF27011.1|IPF1476.1|Contig4-2823_0011|orf6.4445|CA2512|CaO19.7939	ORF|Uncharacterized	Ca21chr3_C_albicans_SC5314	659568	658096	C	CAL0004632	Protein of unknown function
14.29	orf19.308		orf19.7940|IPF27003.1|IPF1478.1|orf6.4446|CA2513|CaO19.308|SNG1|CaO19.7940	ORF|Uncharacterized	Ca21chr3_C_albicans_SC5314	660966	662501	W	CAL0004634	Protein of unknown function
14.29	orf19.309	DAL5	CaO19.309|DAL51|orf19.7941|IPF27000.1|IPF1479.1|Contig4-1938_0003|orf6.4447|CA6173|IPF1479|CaO19.7941	ORF|Uncharacterized	Ca21chr3_C_albicans_SC5314	664878	663301	C	CAL0004637	Allantoate permease; nitrogen catabolite repressed, induced in absence of preferred N sources; nitrogen source regulation requires Gat1; possibly essential gene (by UAU1 method); Hap43-repressed
9.08	orf19.310		orf19.7943|IPF1480.1|IPF1481.1|Contig4-1938_0004|Contig4-1938_0005|orf6.4448|CA6248|orf6.4450|orf19.312|CA6247|ECM181.5f|ECM181.3f	ORF|Uncharacterized	Ca21chr3_C_albicans_SC5314	667273	665753	C	CAL0004660	Putative mitochondrial protein with a predicted role in cell wall biogenesis; possibly an essential gene, disruptants not obtained by UAU1 method
9.08	orf19.313	DAL4	orf19.7944|IPF27017.1|IPF1484.2|Contig4-2361_0006|orf6.4451|orf6.5645|CA2514|FUR4|FUR41|CaO19.313	ORF|Uncharacterized	Ca21chr3_C_albicans_SC5314	669315	667603	C	CAL0004663	Putative allantoin permease; fungal-specific (no human or murine homolog)
9.08	orf19.314		orf19.7946|IPF6747.2|IPF29919.1|Contig4-2797_0025|orf6.5644|CA3394|CaO19.7946|STB2|IPF6747|CaO19.314	ORF|Uncharacterized	Ca21chr3_C_albicans_SC5314	670805	673804	W	CAL0004664	Protein of unknown function
9.08	orf19.315		orf19.7947|IPF27041.1|IPF6748.2|Contig4-2797_0022|orf6.5643|CA3393|CaO19.315|CaO19.7947|IPF6748	ORF|Uncharacterized	Ca21chr3_C_albicans_SC5314	674411	673797	C	CAL0004666	Protein of unknown function
9.08	orf19.316	SEC13	orf19.7948|IPF27025.1|IPF6749.2|Contig4-2797_0021|orf6.5642|CA3392|CaO19.7948|CaO19.316	ORF|Uncharacterized	Ca21chr3_C_albicans_SC5314	674676	675572	W	CAL0004667	Putative protein transport factor; antigenic during murine systemic infection; macrophage-downregulated protein; protein level decreases in stationary phase cultures; Spider biofilm repressed
9.08	orf19.317	PNP1	orf19.7949|IPF6750.1|IPF19266.2|Contig4-2797_0017|orf6.462|orf6.5641|CA3391|CaO19.317	ORF|Uncharacterized	Ca21chr3_C_albicans_SC5314	676623	675700	C	CAL0004668	Purine nucleoside phosphorylase; metabolizes inosine and guanosine nucleosides; in the nicotinamide riboside salvage pathway; Spider biofilm repressed
9.08	orf19.318		orf19.7950|IPF6752.1|IPF19265.1|Contig4-2797_0013|orf6.463|orf6.5640|CA3390|CaO19.318|CAF17	ORF|Uncharacterized	Ca21chr3_C_albicans_SC5314	678438	677029	C	CAL0004670	Protein of unknown function
9.08	orf19.319		orf19.7951|IPF6754.1|IPF19264.2|Contig4-2797_0011|orf6.464|orf6.5639|CA3389|IPF6754|CaO19.319	ORF|Uncharacterized	Ca21chr3_C_albicans_SC5314	679080	678844	C	CAL0004673	Protein of unknown function
9.08	orf19.320		orf19.7952|IPF27026.1|IPF6755.1|Contig4-2797_0005|orf6.5638|CA3388|IPF6755|RSD1|CaO19.320|CaO19.7952	ORF|Uncharacterized	Ca21chr3_C_albicans_SC5314	680121	681122	W	CAL0004696	Predicted short chain dehydrogenase; Spider biofilm induced
9.08	orf19.321		orf19.7953|IPF6757.1|IPF29879.1|Contig4-2797_0003|Contig4-2797_0004|orf6.5637|CA3387|MUP3|CaO19.7953|CaO19.321	ORF|Uncharacterized	Ca21chr3_C_albicans_SC5314	683148	681499	C	CAL0004697	Protein of unknown function
9.08	orf19.322		orf19.7954|IPF6758.2|IPF29887.1|orf6.5636|CA3386|CaO19.322|IPF6758	ORF|Dubious	Ca21chr3_C_albicans_SC5314	685027	684593	C	CAL0004699	Protein of unknown function
9.08	orf19.323		orf19.7955|IPF6764.2|IPF29893.1|Contig4-2777_0010|orf6.5635|CA3385|CaO19.323|CaO19.7955|DRS23	ORF|Verified	Ca21chr3_C_albicans_SC5314	685196	689635	W	CAL0004701	Putative haloacid dehalogenase; localized to plasma membrane
9.08	orf19.325		orf19.7957|IPF26957.1|IPF8362.2|orf6.5633|CA3384|CaO19.7957|CFT2|IPF8362|CaO19.325	ORF|Verified	Ca21chr3_C_albicans_SC5314	690041	692836	W	CAL0004705	Putative mRNA cleavage and polyadenlylation factor; heterozygous null mutant exhibits hypersensitivity to parnafungin and cordycepin in the C. albicans fitness test
9.08	orf19.326		orf19.7958|IPF27062.1|IPF8359.2|Contig4-2705_0001|orf6.5632|CA3383|CaO19.326|CaO19.7958|IPF8359	ORF|Uncharacterized	Ca21chr3_C_albicans_SC5314	693143	693598	W	CAL0004708	Protein of unknown function; Spider biofilm repressed
9.08	orf19.327	HTA3	orf19.7959|IPF27053.1|IPF8358.1|Contig4-2705_0004|orf6.5631|CA3382|CaO19.7959|HTZ1|CaO19.327	ORF|Uncharacterized	Ca21chr3_C_albicans_SC5314	694287	693886	C	CAL0004711	Putative histone H2A; amphotericin B repressed; flucytosine induced; RNA abundance regulated by tyrosol and cell density; Spider biofilm repressed
9.08	orf19.328	NPR2	CaO19.7960|orf19.7960|IPF26980.1|IPF8357.2|Contig4-2705_0009|orf6.5630|CA3381|CaO19.328	ORF|Uncharacterized	Ca21chr3_C_albicans_SC5314	696522	694540	C	CAL0004714	Putative urea transporter; induced during infection of murine kidney, compared to growth in vitro; has murine homolog
9.08	orf19.329		CaO19.329|MSL5|orf19.7961|IPF27016.1|IPF8351.2|Contig4-2705_0010|Contig4-2705_0011|orf6.5629|CA3380|CaO19.7961	ORF|Uncharacterized	Ca21chr3_C_albicans_SC5314	698364	696997	C	CAL0004717	Putative pre-mRNA branch point binding protein; role in mRNA splicing via spliceosome; Spider biofilm repressed
9.08	orf19.331		orf19.7963|IPF27042.1|IPF8350.1|Contig4-2705_0012|orf6.5627|CA3379|CaO19.331|CaO19.7963|IPF8350	ORF|Uncharacterized	Ca21chr3_C_albicans_SC5314	699215	698550	C	CAL0004742	Protein of unknown function
9.08	orf19.332		orf19.7964|IPF8347.2|IPF19023.2|Contig4-2705_0015|orf6.1189|orf6.5626|CA3377|CLF1|CaO19.332	ORF|Uncharacterized	Ca21chr3_C_albicans_SC5314	701822	699717	C	CAL0004743	Member of a complex that contains Prp19; stabilizes U6 snRNA in catalytic forms of the spliceosome containing U2, U5, and U6 snRNAs; Spider biofilm induced
9.08	orf19.333	FCY2	orf19.7965|IPF8342.3|IPF12764.2|Contig4-2216_0002|Contig4-2705_0018|orf6.1188|orf6.1275|orf6.5625|CA0357|FCY22|FCY21|CaO19.333	ORF|Verified	Ca21chr3_C_albicans_SC5314	704237	705817	W	CAL0004745	Purine-cytosine permease of pyrimidine salvage; mutation associated with resistance to flucytosine in clinical isolates; transposon mutation affects filamentation; farnesol-upregulated in biofilm
9.08	orf19.334		orf19.7966|IPF12758.2|IPF29886.1|Contig4-2216_0007|orf6.1276|orf6.7218|CA0394|CaO19.334|IPF12758.5f	ORF|Uncharacterized	Ca21chr3_C_albicans_SC5314	709155	708583	C	CAL0004747	Protein of unknown function; flow model biofilm induced; Spider biofilm induced; regulated by Sef1, Sfu1, and Hap43
9.08	orf19.335		orf19.7967|IPF26972.1|IPF13709.2|orf6.7219|CA4629|CaO19.7967|IPF13709|CaO19.335|SDS22	ORF|Uncharacterized	Ca21chr3_C_albicans_SC5314	714303	716744	W	CAL0004749	Sef1p-, Sfu1p-, and Hap43p-regulated gene
9.08	orf19.336	YAH1	orf19.7969|orf6.7220|IPF27048.1|IPF1537.1|Contig4-3090_0001|CA4630|CaO19.7969|CaO19.336|IPF1537	ORF|Uncharacterized	Ca21chr3_C_albicans_SC5314	717413	716904	C	CAL0004752	Protein similar to oxidoreductases; induced in high iron; Hap43-repressed
9.08	orf19.337	VTI1	CaO19.337|orf19.7970|IPF27044.1|IPF1535.1|Contig4-3090_0002|orf6.7221|CA4631	ORF|Uncharacterized	Ca21chr3_C_albicans_SC5314	718561	717785	C	CAL0004755	Protein of unknown function
9.08	orf19.338		orf19.7971|IPF27096.1|IPF1531.2|Contig4-3090_0006|Contig4-3090_0007|orf6.7222|CA4632|IPF1531|CaO19.7971|CaO19.338	ORF|Uncharacterized	Ca21chr3_C_albicans_SC5314	722018	718875	C	CAL0004758	Putative glycoside hydrolase; stationary phase enriched protein; Hog1p-downregulated; shows colony morphology-related gene regulation by Ssn6p
9.08	orf19.339	NDE1	orf19.7972|IPF26993.1|IPF1529.1|Contig4-3090_0011|orf6.7223|CA4633|NDH1|CaO19.7972|CaO19.339	ORF|Verified	Ca21chr3_C_albicans_SC5314	724676	722952	C	CAL0004762	Putative NADH dehydrogenase; may act alternatively to complex I in respiration; caspofungin repressed; rat catheter biofilm induced; Spider biofilm repressed
9.08	orf19.340		orf19.7973|IPF27045.1|IPF1526.1|Contig4-3090_0013|orf6.7224|CA4634|CaO19.7973|IPF1526|CaO19.340|SRN2	ORF|Uncharacterized	Ca21chr3_C_albicans_SC5314	726274	725675	C	CAL0004784	Protein of unknown function
9.08	orf19.341		orf19.7974|IPF26983.1|IPF1524.2|Contig4-3090_0015|orf6.7225|TPO3|CA4635|CaO19.7974|CaO19.341|IPF1524	ORF|Verified	Ca21chr3_C_albicans_SC5314	728408	726477	C	CAL0004786	Putative spermidine export pump; fungal-specific (no human or murine homolog)
9.08	orf19.342	BMT7	CaO19.7975|WRY8|orf19.7975|IPF26981.1|IPF1520.1|Contig4-3090_0018|orf6.7226|CA4636|CaO19.342|IPF1520	ORF|Uncharacterized	Ca21chr3_C_albicans_SC5314	730947	728992	C	CAL0004787	Beta-mannosyltransferase, member of a 9-gene family that includes characterized genes BMT1, BMT2, BMT3, and BMT4 with roles in beta-1,2-mannosylation of cell wall phosphopeptidomannan; downregulated in azole-resistant strain; Hap43p-induced
9.08	orf19.344		orf19.7977|IPF27032.1|IPF1514.2|Contig4-3090_0023|orf6.7228|CA4637|CaO19.7977|CaO19.344|IPF1514	ORF|Uncharacterized	Ca21chr3_C_albicans_SC5314	734430	733615	C	CAL0004790	Protein of unknown function; upregulated by fluphenazine treatment or in an azole-resistant strain that overexpresses CDR1 and CDR2; transcript possibly regulated by Tac1
9.08	orf19.345		orf19.7978|IPF27012.1|IPF1510.1|Contig4-3090_0030|orf6.7229|CA4638|UGA2|UGA21|CaO19.7978|CaO19.345	ORF|Uncharacterized	Ca21chr3_C_albicans_SC5314	737584	739059	W	CAL0004793	Succinate semialdehyde dehydrogenase; for utilization of gamma-aminobutyrate (GABA) as a nitrogen source; part of 4-aminobutyrate and glutamate degradation pathways; rat catheter biofilm induced
9.08	orf19.346	ALT1	CaO19.346|orf19.7979|IPF27006.1|IPF1509.2|Contig4-3090_0031|orf6.7230|CA4639|IPF1509|CaO19.7979	ORF|Verified	Ca21chr3_C_albicans_SC5314	740759	739197	C	CAL0004796	Putative alanine transaminase; mutation confers hypersensitivity to 5-fluorocytosine (5-FC); rat catheter and flow model biofilm induced
9.08	orf19.347	RSN1	CaO19.7980|orf19.7980|IPF27030.1|IPF1506.1|Contig4-3090_0035|orf6.7231|CA4640|IPF1506|CaO19.347	ORF|Uncharacterized	Ca21chr3_C_albicans_SC5314	743349	744191	W	CAL0004799	Protein of unknown function; flow model biofilm induced; Spider biofilm induced; induced during the mating process; Hap43-repressed
9.08	orf19.348	SKN2	orf19.7981|IPF26976.1|IPF1505.2|Contig4-3090_0037|orf6.7232|CA4641|CaO19.348|CaO19.7981|IPF1505	ORF|Uncharacterized	Ca21chr3_C_albicans_SC5314	745942	748098	W	CAL0004802	Protein with a potential role in beta-1,6 glucan biosynthesis; similarity to Kre6 and Skn1; possibly essential, disruptants not obtained by UAU1 method; Hap43-induced; flow model biofilm induced; rat catheter biofilm repressed
9.08	orf19.349		CaO19.7982|NCA2|orf19.7982|IPF26978.1|IPF1500.2|Contig4-3090_0039|orf6.7233|CA4642|CaO19.349|IPF1500	ORF|Uncharacterized	Ca21chr3_C_albicans_SC5314	750598	748493	C	CAL0004805	Protein of unknown function
9.08	orf19.350	PRE9	orf19.7983|IPF27035.1|IPF1499.1|Contig4-3090_0040|orf6.7234|Y13|CA4643|CaO19.350|CaO19.7983	ORF|Verified	Ca21chr3_C_albicans_SC5314	751676	750921	C	CAL0004819	Alpha3 (C9) subunit of the 20S proteasome; transcript regulated by Mig1; flow model biofilm repressed
9.08	orf19.351		orf19.7984|IPF27055.1|IPF1497.1|Contig4-3090_0042|orf6.7235|CA4644|CaO19.7984|CaO19.351|IPF1497	ORF|Uncharacterized	Ca21chr3_C_albicans_SC5314	752126	752593	W	CAL0004821	Protein of unknown function
9.08	orf19.352		orf19.7985|IPF26995.1|IPF1496.1|Contig4-3090_0045|orf6.7236|CA4645|CaO19.352|CaO19.7985|IPF1496	ORF|Uncharacterized	Ca21chr3_C_albicans_SC5314	752839	754470	W	CAL0004823	Protein of unknown function
9.08	orf19.353	ULP1	orf19.7986|IPF27024.1|IPF1495.1|Contig4-3090_0046|orf6.7237|CA4646|CaO19.353|ULP3|CaO19.7986|IPF1495	ORF|Verified	Ca21chr3_C_albicans_SC5314	755569	754514	C	CAL0004825	SUMO deconjugation enzyme that cleaves the small ubiquitin-like modifier (SUMO) off proteins
9.08	orf19.354		orf19.7987|IPF27010.1|IPF1493.1|Contig4-3090_0048|orf6.7238|CA4647|CaO19.354|CaO19.7987|IPF1493	ORF|Uncharacterized	Ca21chr3_C_albicans_SC5314	755915	757387	W	CAL0004826	Protein of unknown function
9.08	orf19.355		orf19.7988|IPF27018.1|IPF1492.1|Contig4-3090_0049|orf6.7239|TCD4|CaO19.7988|CaO19.355	ORF|Uncharacterized	Ca21chr3_C_albicans_SC5314	758825	757554	C	CAL0004829	Protein of unknown function
9.08	orf19.356	GTT13	orf19.7989|IPF27039.1|IPF1491.1|Contig4-3090_0050|orf6.7240|CaO19.7989|CaO19.356	ORF|Uncharacterized	Ca21chr3_C_albicans_SC5314	760268	759368	C	CAL0004831	Putative glutathione S-transferase; opaque-specific transcript; repressed by alpha pheromone in SpiderM medium; Spider biofilm induced
9.08	orf19.357		orf19.7990|IPF27027.1|IPF1487.2|Contig4-2361_0002|orf6.7241|PHB12|CaO19.357|CaO19.7990	ORF|Uncharacterized	Ca21chr3_C_albicans_SC5314	761588	762439	W	CAL0004834	Protein of unknown function
9.08	orf19.359	GTT12	orf19.7992|IPF27034.1|IPF1485.1|Contig4-2361_0003|orf6.7243	ORF|Uncharacterized	Ca21chr3_C_albicans_SC5314	763333	762507	C	CAL0004842	Protein of unknown function
9.08	orf19.360	FUR4	orf19.7993|IPF27031.1|IPF18195.1|orf6.7244|CaO19.360|CaO19.7993|FUR42	ORF|Uncharacterized	Ca21chr3_C_albicans_SC5314	763877	765589	W	CAL0004851	Putative uracil permease

## Sheet: AMS3052
Supplementary file 4: Coding Sequences within Complex CNVs
Isolate	Chromosome
AMS3052	Chr3
CNV copy number	ORF ID	Standard Name	Alias	Feature Type	Chromosome	Start Position	Stop Position	Strand	Primary CGD ID	Description
3.85	orf19.279		orf19.7911|IPF27060.1|IPF19768.1|orf6.4808|CA2779|CaO19.279|CaO19.7911|IPF3836	ORF|Uncharacterized	Ca21chr3_C_albicans_SC5314	621867	622277	W	CAL0004075	Protein with a predicted D-Tyr-tRNA(Tyr) deacylase domain; Hap43-repressed gene
3.85	orf19.280		orf19.7912|IPF19669.1|Contig4-3050_0012|orf6.4297|orf6.4809|CaO19.7912|CaO19.280	ORF|Uncharacterized	Ca21chr3_C_albicans_SC5314	622788	622378	C	CAL0004079	Protein of unknown function
3.85	orf19.281		CaO19.7913|orf19.7913|IPF27023.1|IPF3798.2|orf6.4810|CA2780|CaO19.281|IPF3831	ORF|Uncharacterized	Ca21chr3_C_albicans_SC5314	623047	624144	W	CAL0004081	Protein of unknown function
3.85	orf19.284		orf19.7916|IPF27036.1|IPF3805.2|orf6.4813|CA2781|IPF3821|CaO19.7916|CaO19.284	ORF|Uncharacterized	Ca21chr3_C_albicans_SC5314	624286	624942	W	CAL0004085	Protein of unknown function
3.85	orf19.285		orf19.7917|IPF27074.1|IPF3806.1|Contig4-3050_0029|orf6.4814|CA2782|CaO19.285|IPF3806|CaO19.7917	ORF|Uncharacterized	Ca21chr3_C_albicans_SC5314	625192	625581	W	CAL0004087	Ortholog of S. cerevisiae Igo2; role in mRNA stabilization of mRNA; Spider biofilm induced
3.85	orf19.286		orf19.7918|IPF27054.1|IPF3808.1|IPF3808|Contig4-3050_0026|orf6.4815|CA2783|ATG10|CaO19.7918|CaO19.286	ORF|Uncharacterized	Ca21chr3_C_albicans_SC5314	626059	626592	W	CAL0004090	Has a predicted autophagy-related protein domain; transcription repressed by fluphenazine treatment
3.85	orf19.287		CaO19.287|CaO19.7919|orf19.7919|IPF27050.1|IPF3810.1|Contig4-3050_0025|orf6.4816|CA2784|IPF3810	ORF|Verified	Ca21chr3_C_albicans_SC5314	627207	626623	C	CAL0004094	Putative NADH-ubiquinone oxidoreductase subunit; Hap43p-repressed gene; repressed by nitric oxide; identified in detergent-resistant membrane fraction (possible lipid raft component)
3.85	orf19.288	MET13	orf19.7920|IPF26987.1|IPF3814.2|Contig4-3050_0022|orf6.4817|CA2785|CaO19.288|CaO19.7920	ORF|Uncharacterized	Ca21chr3_C_albicans_SC5314	630027	628183	C	CAL0004097	Putative methionine biosynthesis protein; ketoconazole-induced; amphotericin B repressed; Spider biofilm repressed
3.85	orf19.290	KRE5	orf19.7922|IPF27067.1|IPF3818.3|Contig4-3050_0020|orf6.4303|orf6.4819|CA2786|GPT1|CaO19.290|KRE5.3eoc|IPF3818.2	ORF|Verified	Ca21chr3_C_albicans_SC5314	634857	630514	C	CAL0004102	UDP-glucose:glycoprotein glucosyltransferase; 1,6-beta-D-glucan biosynthesis, hyphal growth, virulence in mouse IV model; partially complements S. cerevisiae kre5 mutant defects; flow biofilm repressed, Bcr1-repressed in RPMI a/a biofilms
3.85	orf19.291		orf19.7923|IPF27029.1|IPF19948.1|Contig4-3050_0016|Contig4-3050_0017|orf6.4302|CA2409|CaO19.291|CaO19.7923|IPF19948	ORF|Uncharacterized	Ca21chr3_C_albicans_SC5314	635962	635042	C	CAL0004104	Protein of unknown function
3.85	orf19.292		orf19.7924|IPF27038.1|IPF3821.1|orf6.4301|CaO19.7924|CaO19.292	ORF|Uncharacterized	Ca21chr3_C_albicans_SC5314	636894	636238	C	CAL0004106	Protein of unknown function
3.85	orf19.295		orf19.7927|IPF27021.1|IPF3831.1|Contig4-3050_0013|orf6.4298|CaO19.295|CaO19.7927	ORF|Uncharacterized	Ca21chr3_C_albicans_SC5314	638133	637036	C	CAL0004111	Protein of unknown function
3.85	orf19.296		orf19.7928|IPF27058.1|IPF3833.1|CA2408|IPF3833|orf6.4297|CaO19.296|CaO19.7928	ORF|Uncharacterized	Ca21chr3_C_albicans_SC5314	638390	638800	W	CAL0004116	Protein of unknown function
3.85	orf19.297	DTD2	CaO19.7929|orf19.7929|IPF27061.1|IPF3836.2|Contig4-3050_0011|orf6.4296|CaO19.297	ORF|Uncharacterized	Ca21chr3_C_albicans_SC5314	639473	638901	C	CAL0004118	Protein of unknown function
6.04	orf19.299	ECM14	orf19.7931|IPF27014.1|IPF3838.2|Contig4-3050_0009|orf6.4294|CA2407|CaO19.299|CaO19.7931	ORF|Uncharacterized	Ca21chr3_C_albicans_SC5314	641122	639710	C	CAL0004123	Protein of unknown function
6.04	orf19.300	AIP2	orf19.7932|orf19.7933|IPF26999.1|IPF3840.1|Contig4-3050_0007|orf6.4293|CA2406|CaO19.300|DLD2|CaO19.7932	ORF|Uncharacterized	Ca21chr3_C_albicans_SC5314	641879	643462	W	CAL0004623	Putative actin interacting protein; regulated by Gcn4; induced in response to amino acid starvation (3-AT); repressed by elevated CO2; flow model biofilm repressed
6.04	orf19.301	PGA18	orf19.7933|IPF26975.1|IPF3844.2|Contig4-3050_0006|orf6.4292|CA2405|CaO19.301|IPF3844|CaO19.7933	ORF|Uncharacterized	Ca21chr3_C_albicans_SC5314	646393	644132	C	CAL0004624	Putative GPI-anchored protein; regulated by Nrg1, Tup1; rat catheter biofilm repressed
6.04	orf19.302		BET5|CaO19.302|orf19.7934|IPF27043.1|IPF1468.1|Contig4-2823_0003|orf6.4440|CA2508|CaO19.7934	ORF|Uncharacterized	Ca21chr3_C_albicans_SC5314	651673	652155	W	CAL0004625	Protein of unknown function
6.04	orf19.304		orf19.7936|IPF26998.1|IPF1471.2|Contig4-2823_0004|orf6.4442|CA2509|CaO19.7936|IPF1471|CaO19.304	ORF|Uncharacterized	Ca21chr3_C_albicans_SC5314	652873	654390	W	CAL0004626	Putative transporter similar to MDR proteins; fungal-specific; Spider biofilm induced
6.04	orf19.305		orf19.7937|IPF27019.1|IPF1472.2|Contig4-2823_0007|orf6.4443|CA2510|CaO19.305|CaO19.7937|IPF1472	ORF|Uncharacterized	Ca21chr3_C_albicans_SC5314	654605	655855	W	CAL0004628	Protein of unknown function; upregulated in a cyr1 null mutant
6.04	orf19.306	USO5	orf19.7938|IPF26986.1|IPF1474.2|Contig4-2823_0010|orf6.4444|CA2511|ABPD|CaO19.306|CaO19.7938|IPF1474	ORF|Uncharacterized	Ca21chr3_C_albicans_SC5314	656184	658043	W	CAL0004630	Putative type II myosin heavy chain; transcription is induced upon filamentous growth and in response to alpha pheromone in SpiderM medium
6.04	orf19.307		HFI1|CaO19.307|orf19.7939|IPF27011.1|IPF1476.1|Contig4-2823_0011|orf6.4445|CA2512|CaO19.7939	ORF|Uncharacterized	Ca21chr3_C_albicans_SC5314	659568	658096	C	CAL0004632	Protein of unknown function
6.04	orf19.308		orf19.7940|IPF27003.1|IPF1478.1|orf6.4446|CA2513|CaO19.308|SNG1|CaO19.7940	ORF|Uncharacterized	Ca21chr3_C_albicans_SC5314	660966	662501	W	CAL0004634	Protein of unknown function
6.04	orf19.309	DAL5	CaO19.309|DAL51|orf19.7941|IPF27000.1|IPF1479.1|Contig4-1938_0003|orf6.4447|CA6173|IPF1479|CaO19.7941	ORF|Uncharacterized	Ca21chr3_C_albicans_SC5314	664878	663301	C	CAL0004637	Allantoate permease; nitrogen catabolite repressed, induced in absence of preferred N sources; nitrogen source regulation requires Gat1; possibly essential gene (by UAU1 method); Hap43-repressed
6.04	orf19.310		orf19.7943|IPF1480.1|IPF1481.1|Contig4-1938_0004|Contig4-1938_0005|orf6.4448|CA6248|orf6.4450|orf19.312|CA6247|ECM181.5f|ECM181.3f	ORF|Uncharacterized	Ca21chr3_C_albicans_SC5314	667273	665753	C	CAL0004660	Putative mitochondrial protein with a predicted role in cell wall biogenesis; possibly an essential gene, disruptants not obtained by UAU1 method
6.04	orf19.313	DAL4	orf19.7944|IPF27017.1|IPF1484.2|Contig4-2361_0006|orf6.4451|orf6.5645|CA2514|FUR4|FUR41|CaO19.313	ORF|Uncharacterized	Ca21chr3_C_albicans_SC5314	669315	667603	C	CAL0004663	Putative allantoin permease; fungal-specific (no human or murine homolog)
6.04	orf19.314		orf19.7946|IPF6747.2|IPF29919.1|Contig4-2797_0025|orf6.5644|CA3394|CaO19.7946|STB2|IPF6747|CaO19.314	ORF|Uncharacterized	Ca21chr3_C_albicans_SC5314	670805	673804	W	CAL0004664	Protein of unknown function
6.04	orf19.315		orf19.7947|IPF27041.1|IPF6748.2|Contig4-2797_0022|orf6.5643|CA3393|CaO19.315|CaO19.7947|IPF6748	ORF|Uncharacterized	Ca21chr3_C_albicans_SC5314	674411	673797	C	CAL0004666	Protein of unknown function
6.04	orf19.316	SEC13	orf19.7948|IPF27025.1|IPF6749.2|Contig4-2797_0021|orf6.5642|CA3392|CaO19.7948|CaO19.316	ORF|Uncharacterized	Ca21chr3_C_albicans_SC5314	674676	675572	W	CAL0004667	Putative protein transport factor; antigenic during murine systemic infection; macrophage-downregulated protein; protein level decreases in stationary phase cultures; Spider biofilm repressed
6.04	orf19.317	PNP1	orf19.7949|IPF6750.1|IPF19266.2|Contig4-2797_0017|orf6.462|orf6.5641|CA3391|CaO19.317	ORF|Uncharacterized	Ca21chr3_C_albicans_SC5314	676623	675700	C	CAL0004668	Purine nucleoside phosphorylase; metabolizes inosine and guanosine nucleosides; in the nicotinamide riboside salvage pathway; Spider biofilm repressed
6.04	orf19.318		orf19.7950|IPF6752.1|IPF19265.1|Contig4-2797_0013|orf6.463|orf6.5640|CA3390|CaO19.318|CAF17	ORF|Uncharacterized	Ca21chr3_C_albicans_SC5314	678438	677029	C	CAL0004670	Protein of unknown function
6.04	orf19.319		orf19.7951|IPF6754.1|IPF19264.2|Contig4-2797_0011|orf6.464|orf6.5639|CA3389|IPF6754|CaO19.319	ORF|Uncharacterized	Ca21chr3_C_albicans_SC5314	679080	678844	C	CAL0004673	Protein of unknown function
6.04	orf19.320		orf19.7952|IPF27026.1|IPF6755.1|Contig4-2797_0005|orf6.5638|CA3388|IPF6755|RSD1|CaO19.320|CaO19.7952	ORF|Uncharacterized	Ca21chr3_C_albicans_SC5314	680121	681122	W	CAL0004696	Predicted short chain dehydrogenase; Spider biofilm induced
6.04	orf19.321		orf19.7953|IPF6757.1|IPF29879.1|Contig4-2797_0003|Contig4-2797_0004|orf6.5637|CA3387|MUP3|CaO19.7953|CaO19.321	ORF|Uncharacterized	Ca21chr3_C_albicans_SC5314	683148	681499	C	CAL0004697	Protein of unknown function
6.04	orf19.322		orf19.7954|IPF6758.2|IPF29887.1|orf6.5636|CA3386|CaO19.322|IPF6758	ORF|Dubious	Ca21chr3_C_albicans_SC5314	685027	684593	C	CAL0004699	Protein of unknown function
6.04	orf19.323		orf19.7955|IPF6764.2|IPF29893.1|Contig4-2777_0010|orf6.5635|CA3385|CaO19.323|CaO19.7955|DRS23	ORF|Verified	Ca21chr3_C_albicans_SC5314	685196	689635	W	CAL0004701	Putative haloacid dehalogenase; localized to plasma membrane
6.04	orf19.325		orf19.7957|IPF26957.1|IPF8362.2|orf6.5633|CA3384|CaO19.7957|CFT2|IPF8362|CaO19.325	ORF|Verified	Ca21chr3_C_albicans_SC5314	690041	692836	W	CAL0004705	Putative mRNA cleavage and polyadenlylation factor; heterozygous null mutant exhibits hypersensitivity to parnafungin and cordycepin in the C. albicans fitness test
6.04	orf19.326		orf19.7958|IPF27062.1|IPF8359.2|Contig4-2705_0001|orf6.5632|CA3383|CaO19.326|CaO19.7958|IPF8359	ORF|Uncharacterized	Ca21chr3_C_albicans_SC5314	693143	693598	W	CAL0004708	Protein of unknown function; Spider biofilm repressed
6.04	orf19.327	HTA3	orf19.7959|IPF27053.1|IPF8358.1|Contig4-2705_0004|orf6.5631|CA3382|CaO19.7959|HTZ1|CaO19.327	ORF|Uncharacterized	Ca21chr3_C_albicans_SC5314	694287	693886	C	CAL0004711	Putative histone H2A; amphotericin B repressed; flucytosine induced; RNA abundance regulated by tyrosol and cell density; Spider biofilm repressed
6.04	orf19.328	NPR2	CaO19.7960|orf19.7960|IPF26980.1|IPF8357.2|Contig4-2705_0009|orf6.5630|CA3381|CaO19.328	ORF|Uncharacterized	Ca21chr3_C_albicans_SC5314	696522	694540	C	CAL0004714	Putative urea transporter; induced during infection of murine kidney, compared to growth in vitro; has murine homolog
6.04	orf19.329		CaO19.329|MSL5|orf19.7961|IPF27016.1|IPF8351.2|Contig4-2705_0010|Contig4-2705_0011|orf6.5629|CA3380|CaO19.7961	ORF|Uncharacterized	Ca21chr3_C_albicans_SC5314	698364	696997	C	CAL0004717	Putative pre-mRNA branch point binding protein; role in mRNA splicing via spliceosome; Spider biofilm repressed
6.04	orf19.331		orf19.7963|IPF27042.1|IPF8350.1|Contig4-2705_0012|orf6.5627|CA3379|CaO19.331|CaO19.7963|IPF8350	ORF|Uncharacterized	Ca21chr3_C_albicans_SC5314	699215	698550	C	CAL0004742	Protein of unknown function
6.04	orf19.332		orf19.7964|IPF8347.2|IPF19023.2|Contig4-2705_0015|orf6.1189|orf6.5626|CA3377|CLF1|CaO19.332	ORF|Uncharacterized	Ca21chr3_C_albicans_SC5314	701822	699717	C	CAL0004743	Member of a complex that contains Prp19; stabilizes U6 snRNA in catalytic forms of the spliceosome containing U2, U5, and U6 snRNAs; Spider biofilm induced
6.04	orf19.333	FCY2	orf19.7965|IPF8342.3|IPF12764.2|Contig4-2216_0002|Contig4-2705_0018|orf6.1188|orf6.1275|orf6.5625|CA0357|FCY22|FCY21|CaO19.333	ORF|Verified	Ca21chr3_C_albicans_SC5314	704237	705817	W	CAL0004745	Purine-cytosine permease of pyrimidine salvage; mutation associated with resistance to flucytosine in clinical isolates; transposon mutation affects filamentation; farnesol-upregulated in biofilm
6.04	orf19.334		orf19.7966|IPF12758.2|IPF29886.1|Contig4-2216_0007|orf6.1276|orf6.7218|CA0394|CaO19.334|IPF12758.5f	ORF|Uncharacterized	Ca21chr3_C_albicans_SC5314	709155	708583	C	CAL0004747	Protein of unknown function; flow model biofilm induced; Spider biofilm induced; regulated by Sef1, Sfu1, and Hap43
6.04	orf19.335		orf19.7967|IPF26972.1|IPF13709.2|orf6.7219|CA4629|CaO19.7967|IPF13709|CaO19.335|SDS22	ORF|Uncharacterized	Ca21chr3_C_albicans_SC5314	714303	716744	W	CAL0004749	Sef1p-, Sfu1p-, and Hap43p-regulated gene
6.04	orf19.336	YAH1	orf19.7969|orf6.7220|IPF27048.1|IPF1537.1|Contig4-3090_0001|CA4630|CaO19.7969|CaO19.336|IPF1537	ORF|Uncharacterized	Ca21chr3_C_albicans_SC5314	717413	716904	C	CAL0004752	Protein similar to oxidoreductases; induced in high iron; Hap43-repressed
6.04	orf19.337	VTI1	CaO19.337|orf19.7970|IPF27044.1|IPF1535.1|Contig4-3090_0002|orf6.7221|CA4631	ORF|Uncharacterized	Ca21chr3_C_albicans_SC5314	718561	717785	C	CAL0004755	Protein of unknown function
6.04	orf19.338		orf19.7971|IPF27096.1|IPF1531.2|Contig4-3090_0006|Contig4-3090_0007|orf6.7222|CA4632|IPF1531|CaO19.7971|CaO19.338	ORF|Uncharacterized	Ca21chr3_C_albicans_SC5314	722018	718875	C	CAL0004758	Putative glycoside hydrolase; stationary phase enriched protein; Hog1p-downregulated; shows colony morphology-related gene regulation by Ssn6p
6.04	orf19.339	NDE1	orf19.7972|IPF26993.1|IPF1529.1|Contig4-3090_0011|orf6.7223|CA4633|NDH1|CaO19.7972|CaO19.339	ORF|Verified	Ca21chr3_C_albicans_SC5314	724676	722952	C	CAL0004762	Putative NADH dehydrogenase; may act alternatively to complex I in respiration; caspofungin repressed; rat catheter biofilm induced; Spider biofilm repressed
6.04	orf19.340		orf19.7973|IPF27045.1|IPF1526.1|Contig4-3090_0013|orf6.7224|CA4634|CaO19.7973|IPF1526|CaO19.340|SRN2	ORF|Uncharacterized	Ca21chr3_C_albicans_SC5314	726274	725675	C	CAL0004784	Protein of unknown function
6.04	orf19.341		orf19.7974|IPF26983.1|IPF1524.2|Contig4-3090_0015|orf6.7225|TPO3|CA4635|CaO19.7974|CaO19.341|IPF1524	ORF|Verified	Ca21chr3_C_albicans_SC5314	728408	726477	C	CAL0004786	Putative spermidine export pump; fungal-specific (no human or murine homolog)
6.04	orf19.342	BMT7	CaO19.7975|WRY8|orf19.7975|IPF26981.1|IPF1520.1|Contig4-3090_0018|orf6.7226|CA4636|CaO19.342|IPF1520	ORF|Uncharacterized	Ca21chr3_C_albicans_SC5314	730947	728992	C	CAL0004787	Beta-mannosyltransferase, member of a 9-gene family that includes characterized genes BMT1, BMT2, BMT3, and BMT4 with roles in beta-1,2-mannosylation of cell wall phosphopeptidomannan; downregulated in azole-resistant strain; Hap43p-induced
6.04	orf19.344		orf19.7977|IPF27032.1|IPF1514.2|Contig4-3090_0023|orf6.7228|CA4637|CaO19.7977|CaO19.344|IPF1514	ORF|Uncharacterized	Ca21chr3_C_albicans_SC5314	734430	733615	C	CAL0004790	Protein of unknown function; upregulated by fluphenazine treatment or in an azole-resistant strain that overexpresses CDR1 and CDR2; transcript possibly regulated by Tac1
6.04	orf19.345		orf19.7978|IPF27012.1|IPF1510.1|Contig4-3090_0030|orf6.7229|CA4638|UGA2|UGA21|CaO19.7978|CaO19.345	ORF|Uncharacterized	Ca21chr3_C_albicans_SC5314	737584	739059	W	CAL0004793	Succinate semialdehyde dehydrogenase; for utilization of gamma-aminobutyrate (GABA) as a nitrogen source; part of 4-aminobutyrate and glutamate degradation pathways; rat catheter biofilm induced
6.04	orf19.346	ALT1	CaO19.346|orf19.7979|IPF27006.1|IPF1509.2|Contig4-3090_0031|orf6.7230|CA4639|IPF1509|CaO19.7979	ORF|Verified	Ca21chr3_C_albicans_SC5314	740759	739197	C	CAL0004796	Putative alanine transaminase; mutation confers hypersensitivity to 5-fluorocytosine (5-FC); rat catheter and flow model biofilm induced
6.04	orf19.347	RSN1	CaO19.7980|orf19.7980|IPF27030.1|IPF1506.1|Contig4-3090_0035|orf6.7231|CA4640|IPF1506|CaO19.347	ORF|Uncharacterized	Ca21chr3_C_albicans_SC5314	743349	744191	W	CAL0004799	Protein of unknown function; flow model biofilm induced; Spider biofilm induced; induced during the mating process; Hap43-repressed
6.04	orf19.348	SKN2	orf19.7981|IPF26976.1|IPF1505.2|Contig4-3090_0037|orf6.7232|CA4641|CaO19.348|CaO19.7981|IPF1505	ORF|Uncharacterized	Ca21chr3_C_albicans_SC5314	745942	748098	W	CAL0004802	Protein with a potential role in beta-1,6 glucan biosynthesis; similarity to Kre6 and Skn1; possibly essential, disruptants not obtained by UAU1 method; Hap43-induced; flow model biofilm induced; rat catheter biofilm repressed
6.04	orf19.349		CaO19.7982|NCA2|orf19.7982|IPF26978.1|IPF1500.2|Contig4-3090_0039|orf6.7233|CA4642|CaO19.349|IPF1500	ORF|Uncharacterized	Ca21chr3_C_albicans_SC5314	750598	748493	C	CAL0004805	Protein of unknown function
6.04	orf19.350	PRE9	orf19.7983|IPF27035.1|IPF1499.1|Contig4-3090_0040|orf6.7234|Y13|CA4643|CaO19.350|CaO19.7983	ORF|Verified	Ca21chr3_C_albicans_SC5314	751676	750921	C	CAL0004819	Alpha3 (C9) subunit of the 20S proteasome; transcript regulated by Mig1; flow model biofilm repressed
6.04	orf19.351		orf19.7984|IPF27055.1|IPF1497.1|Contig4-3090_0042|orf6.7235|CA4644|CaO19.7984|CaO19.351|IPF1497	ORF|Uncharacterized	Ca21chr3_C_albicans_SC5314	752126	752593	W	CAL0004821	Protein of unknown function
6.04	orf19.352		orf19.7985|IPF26995.1|IPF1496.1|Contig4-3090_0045|orf6.7236|CA4645|CaO19.352|CaO19.7985|IPF1496	ORF|Uncharacterized	Ca21chr3_C_albicans_SC5314	752839	754470	W	CAL0004823	Protein of unknown function
6.04	orf19.353	ULP1	orf19.7986|IPF27024.1|IPF1495.1|Contig4-3090_0046|orf6.7237|CA4646|CaO19.353|ULP3|CaO19.7986|IPF1495	ORF|Verified	Ca21chr3_C_albicans_SC5314	755569	754514	C	CAL0004825	SUMO deconjugation enzyme that cleaves the small ubiquitin-like modifier (SUMO) off proteins
6.04	orf19.354		orf19.7987|IPF27010.1|IPF1493.1|Contig4-3090_0048|orf6.7238|CA4647|CaO19.354|CaO19.7987|IPF1493	ORF|Uncharacterized	Ca21chr3_C_albicans_SC5314	755915	757387	W	CAL0004826	Protein of unknown function
6.04	orf19.355		orf19.7988|IPF27018.1|IPF1492.1|Contig4-3090_0049|orf6.7239|TCD4|CaO19.7988|CaO19.355	ORF|Uncharacterized	Ca21chr3_C_albicans_SC5314	758825	757554	C	CAL0004829	Protein of unknown function
6.04	orf19.356	GTT13	orf19.7989|IPF27039.1|IPF1491.1|Contig4-3090_0050|orf6.7240|CaO19.7989|CaO19.356	ORF|Uncharacterized	Ca21chr3_C_albicans_SC5314	760268	759368	C	CAL0004831	Putative glutathione S-transferase; opaque-specific transcript; repressed by alpha pheromone in SpiderM medium; Spider biofilm induced
6.04	orf19.357		orf19.7990|IPF27027.1|IPF1487.2|Contig4-2361_0002|orf6.7241|PHB12|CaO19.357|CaO19.7990	ORF|Uncharacterized	Ca21chr3_C_albicans_SC5314	761588	762439	W	CAL0004834	Protein of unknown function
6.04	orf19.359	GTT12	orf19.7992|IPF27034.1|IPF1485.1|Contig4-2361_0003|orf6.7243	ORF|Uncharacterized	Ca21chr3_C_albicans_SC5314	763333	762507	C	CAL0004842	Protein of unknown function
6.04	orf19.360	FUR4	orf19.7993|IPF27031.1|IPF18195.1|orf6.7244|CaO19.360|CaO19.7993|FUR42	ORF|Uncharacterized	Ca21chr3_C_albicans_SC5314	763877	765589	W	CAL0004851	Putative uracil permease
6.04	orf19.2813		orf19.10331|IPF24535.1|IPF3539.2|Contig4-3051_0001|orf6.4580|CA2617|CaO19.10331|IPF3539|CaO19.2813	ORF|Dubious	Ca21chr3_C_albicans_SC5314	822372	822244	C	CAL0005053	Protein of unknown function
6.04	orf19.298		IPF27056.1|IPF18470.1|orf6.4295|CaO19.298|CaO19.7930	ORF|Uncharacterized	Ca21chr3_C_albicans_SC5314	639472	639975	W	CAF0006893	Protein of unknown function; flow model biofilm induced
6.04	orf19.330.1	RUB1	IPF26964.1|IPF8348.1|CA3378	ORF|Verified	Ca21chr3_C_albicans_SC5314	699417	699650	W	CAF0006894	Ubiquitin-related protein with similarity to mammalian NEDD8; reversible conjugation (neddylation) of the cullin subunit (Cdc53p) modulates the ubiquitin ligase activity of the SCF complexes
6.04	orf19.6940		IPF20204.1|IPF27613.1|Contig4-3085_0009|orf6.7326|CaO19.14202|CaO19.6940	ORF|Uncharacterized	Ca21chr3_C_albicans_SC5314	794013	794453	W	CAF0007091	Protein of unknown function
6.04	tE(UUC)1	tE(UUC)1	tE(UUC)1.2|tE(TTC)1	tRNA|Uncharacterized	Ca21chr3_C_albicans_SC5314	703182	703275	W	CAF0007147	tRNA-Glu, predicted by tRNAscan-SE; UUC anticodon
6.04	tK(CUU)1	tK(CUU)1	tK(CUU)1.2|tK(CTT)1	tRNA|Uncharacterized	Ca21chr3_C_albicans_SC5314	681357	681268	C	CAF0007177	tRNA-Lys, predicted by tRNAscan-SE; CUU anticodon
6.04	CEN3			centromere	Ca21chr3_C_albicans_SC5314	823333	826481	W	CAF0007460	Centromere region of Chromosome 3; each centromere mediates a single kinetochore attachment although it binds multiple (four) Cse4p-containing nucleosomes
6.04	orf19.332.1			ORF|Uncharacterized	Ca21chr3_C_albicans_SC5314	702577	702293	C	CAL0120690	Protein of unknown function
6.04	orf19.6923.1			ORF|Uncharacterized	Ca21chr3_C_albicans_SC5314	819560	819775	W	CAL0120936	Protein of unknown function
6.04	zeta-3a			long_terminal_repeat	Ca21chr3_C_albicans_SC5314	822759	822260	C	CAL0122754	Long terminal repeat (LTR) associated with the transposon Tca7; degenerated copy near Chromosome 3 centromere

## Sheet: AMS3053
Supplementary file 4: Coding Sequences within Complex CNVs
Isolate	Chromosome
AMS3053	Chr3
CNV copy number	ORF ID	Standard Name	Alias	Feature Type	Chromosome	Start Position	Stop Position	Strand	Primary CGD ID	Description
2.28	orf19.279		orf19.7911|IPF27060.1|IPF19768.1|orf6.4808|CA2779|CaO19.279|CaO19.7911|IPF3836	ORF|Uncharacterized	Ca21chr3_C_albicans_SC5314	621867	622277	W	CAL0004075	Protein with a predicted D-Tyr-tRNA(Tyr) deacylase domain; Hap43-repressed gene
2.28	orf19.280		orf19.7912|IPF19669.1|Contig4-3050_0012|orf6.4297|orf6.4809|CaO19.7912|CaO19.280	ORF|Uncharacterized	Ca21chr3_C_albicans_SC5314	622788	622378	C	CAL0004079	Protein of unknown function
2.28	orf19.281		CaO19.7913|orf19.7913|IPF27023.1|IPF3798.2|orf6.4810|CA2780|CaO19.281|IPF3831	ORF|Uncharacterized	Ca21chr3_C_albicans_SC5314	623047	624144	W	CAL0004081	Protein of unknown function
2.28	orf19.284		orf19.7916|IPF27036.1|IPF3805.2|orf6.4813|CA2781|IPF3821|CaO19.7916|CaO19.284	ORF|Uncharacterized	Ca21chr3_C_albicans_SC5314	624286	624942	W	CAL0004085	Protein of unknown function
2.28	orf19.285		orf19.7917|IPF27074.1|IPF3806.1|Contig4-3050_0029|orf6.4814|CA2782|CaO19.285|IPF3806|CaO19.7917	ORF|Uncharacterized	Ca21chr3_C_albicans_SC5314	625192	625581	W	CAL0004087	Ortholog of S. cerevisiae Igo2; role in mRNA stabilization of mRNA; Spider biofilm induced
2.28	orf19.286		orf19.7918|IPF27054.1|IPF3808.1|IPF3808|Contig4-3050_0026|orf6.4815|CA2783|ATG10|CaO19.7918|CaO19.286	ORF|Uncharacterized	Ca21chr3_C_albicans_SC5314	626059	626592	W	CAL0004090	Has a predicted autophagy-related protein domain; transcription repressed by fluphenazine treatment
2.28	orf19.287		CaO19.287|CaO19.7919|orf19.7919|IPF27050.1|IPF3810.1|Contig4-3050_0025|orf6.4816|CA2784|IPF3810	ORF|Verified	Ca21chr3_C_albicans_SC5314	627207	626623	C	CAL0004094	Putative NADH-ubiquinone oxidoreductase subunit; Hap43p-repressed gene; repressed by nitric oxide; identified in detergent-resistant membrane fraction (possible lipid raft component)
2.28	orf19.288	MET13	orf19.7920|IPF26987.1|IPF3814.2|Contig4-3050_0022|orf6.4817|CA2785|CaO19.288|CaO19.7920	ORF|Uncharacterized	Ca21chr3_C_albicans_SC5314	630027	628183	C	CAL0004097	Putative methionine biosynthesis protein; ketoconazole-induced; amphotericin B repressed; Spider biofilm repressed
2.28	orf19.290	KRE5	orf19.7922|IPF27067.1|IPF3818.3|Contig4-3050_0020|orf6.4303|orf6.4819|CA2786|GPT1|CaO19.290|KRE5.3eoc|IPF3818.2	ORF|Verified	Ca21chr3_C_albicans_SC5314	634857	630514	C	CAL0004102	UDP-glucose:glycoprotein glucosyltransferase; 1,6-beta-D-glucan biosynthesis, hyphal growth, virulence in mouse IV model; partially complements S. cerevisiae kre5 mutant defects; flow biofilm repressed, Bcr1-repressed in RPMI a/a biofilms
2.28	orf19.291		orf19.7923|IPF27029.1|IPF19948.1|Contig4-3050_0016|Contig4-3050_0017|orf6.4302|CA2409|CaO19.291|CaO19.7923|IPF19948	ORF|Uncharacterized	Ca21chr3_C_albicans_SC5314	635962	635042	C	CAL0004104	Protein of unknown function
2.28	orf19.292		orf19.7924|IPF27038.1|IPF3821.1|orf6.4301|CaO19.7924|CaO19.292	ORF|Uncharacterized	Ca21chr3_C_albicans_SC5314	636894	636238	C	CAL0004106	Protein of unknown function
2.28	orf19.295		orf19.7927|IPF27021.1|IPF3831.1|Contig4-3050_0013|orf6.4298|CaO19.295|CaO19.7927	ORF|Uncharacterized	Ca21chr3_C_albicans_SC5314	638133	637036	C	CAL0004111	Protein of unknown function
2.28	orf19.296		orf19.7928|IPF27058.1|IPF3833.1|CA2408|IPF3833|orf6.4297|CaO19.296|CaO19.7928	ORF|Uncharacterized	Ca21chr3_C_albicans_SC5314	638390	638800	W	CAL0004116	Protein of unknown function
2.28	orf19.297	DTD2	CaO19.7929|orf19.7929|IPF27061.1|IPF3836.2|Contig4-3050_0011|orf6.4296|CaO19.297	ORF|Uncharacterized	Ca21chr3_C_albicans_SC5314	639473	638901	C	CAL0004118	Protein of unknown function
2.85	orf19.299	ECM14	orf19.7931|IPF27014.1|IPF3838.2|Contig4-3050_0009|orf6.4294|CA2407|CaO19.299|CaO19.7931	ORF|Uncharacterized	Ca21chr3_C_albicans_SC5314	641122	639710	C	CAL0004123	Protein of unknown function
2.85	orf19.300	AIP2	orf19.7932|orf19.7933|IPF26999.1|IPF3840.1|Contig4-3050_0007|orf6.4293|CA2406|CaO19.300|DLD2|CaO19.7932	ORF|Uncharacterized	Ca21chr3_C_albicans_SC5314	641879	643462	W	CAL0004623	Putative actin interacting protein; regulated by Gcn4; induced in response to amino acid starvation (3-AT); repressed by elevated CO2; flow model biofilm repressed
2.85	orf19.301	PGA18	orf19.7933|IPF26975.1|IPF3844.2|Contig4-3050_0006|orf6.4292|CA2405|CaO19.301|IPF3844|CaO19.7933	ORF|Uncharacterized	Ca21chr3_C_albicans_SC5314	646393	644132	C	CAL0004624	Putative GPI-anchored protein; regulated by Nrg1, Tup1; rat catheter biofilm repressed
2.85	orf19.302		BET5|CaO19.302|orf19.7934|IPF27043.1|IPF1468.1|Contig4-2823_0003|orf6.4440|CA2508|CaO19.7934	ORF|Uncharacterized	Ca21chr3_C_albicans_SC5314	651673	652155	W	CAL0004625	Protein of unknown function
2.85	orf19.304		orf19.7936|IPF26998.1|IPF1471.2|Contig4-2823_0004|orf6.4442|CA2509|CaO19.7936|IPF1471|CaO19.304	ORF|Uncharacterized	Ca21chr3_C_albicans_SC5314	652873	654390	W	CAL0004626	Putative transporter similar to MDR proteins; fungal-specific; Spider biofilm induced
2.85	orf19.305		orf19.7937|IPF27019.1|IPF1472.2|Contig4-2823_0007|orf6.4443|CA2510|CaO19.305|CaO19.7937|IPF1472	ORF|Uncharacterized	Ca21chr3_C_albicans_SC5314	654605	655855	W	CAL0004628	Protein of unknown function; upregulated in a cyr1 null mutant
2.85	orf19.306	USO5	orf19.7938|IPF26986.1|IPF1474.2|Contig4-2823_0010|orf6.4444|CA2511|ABPD|CaO19.306|CaO19.7938|IPF1474	ORF|Uncharacterized	Ca21chr3_C_albicans_SC5314	656184	658043	W	CAL0004630	Putative type II myosin heavy chain; transcription is induced upon filamentous growth and in response to alpha pheromone in SpiderM medium
2.85	orf19.307		HFI1|CaO19.307|orf19.7939|IPF27011.1|IPF1476.1|Contig4-2823_0011|orf6.4445|CA2512|CaO19.7939	ORF|Uncharacterized	Ca21chr3_C_albicans_SC5314	659568	658096	C	CAL0004632	Protein of unknown function
2.85	orf19.308		orf19.7940|IPF27003.1|IPF1478.1|orf6.4446|CA2513|CaO19.308|SNG1|CaO19.7940	ORF|Uncharacterized	Ca21chr3_C_albicans_SC5314	660966	662501	W	CAL0004634	Protein of unknown function
2.85	orf19.309	DAL5	CaO19.309|DAL51|orf19.7941|IPF27000.1|IPF1479.1|Contig4-1938_0003|orf6.4447|CA6173|IPF1479|CaO19.7941	ORF|Uncharacterized	Ca21chr3_C_albicans_SC5314	664878	663301	C	CAL0004637	Allantoate permease; nitrogen catabolite repressed, induced in absence of preferred N sources; nitrogen source regulation requires Gat1; possibly essential gene (by UAU1 method); Hap43-repressed
2.85	orf19.310		orf19.7943|IPF1480.1|IPF1481.1|Contig4-1938_0004|Contig4-1938_0005|orf6.4448|CA6248|orf6.4450|orf19.312|CA6247|ECM181.5f|ECM181.3f	ORF|Uncharacterized	Ca21chr3_C_albicans_SC5314	667273	665753	C	CAL0004660	Putative mitochondrial protein with a predicted role in cell wall biogenesis; possibly an essential gene, disruptants not obtained by UAU1 method
[truncated: 44 more rows]

[truncated: 3 more sheets: AMS3054, AMS3094, AMS3092]
