# Supplementary material for: Expandable and reversible copy number amplification drives rapid adaptation to antifungal drugs
Source: eLife. 2020 Jul 20;9:e58349. doi: 10.7554/eLife.58349 (PMC7371428; doi:10.7554/eLife.58349)
Supplement: Supplementary file 5. [file elife-58349-supp5.xlsx]

## Sheet: Sheet1
Supplementary file 5: Primers used in this study
Primer Name (With Chr Position)	Sequence (5' - 3')	Decription
960_ORF19.344_Chr3:734203_734183	TCCACCACCAACTCCAACTAC	DIG Probe
961_ORF19.344_Chr3:733675_733695	TTTAGTTCCTTCCACGGCAGC	DIG Probe
496_CEN3_Chr3:824425_824444	AGAGCTACACCACGCAAGAC	DIG Probe
497_CEN3_Chr3:824912_824893	ACAGCACTGCCTTTGACGTA	DIG Probe
