# Supplementary material for: Expandable and reversible copy number amplification drives rapid adaptation to antifungal drugs
Source: eLife. 2020 Jul 20;9:e58349. doi: 10.7554/eLife.58349 (PMC7371428; doi:10.7554/eLife.58349)
Supplement: Supplementary file 6. [file elife-58349-supp6.xlsx]

## Sheet: Sheet1
Supplementary file 6: Summary of complex CNV features
Strain	Chromosome	Segment	Segment Length (bp)	Samtools Mean Copy Number	Samtools mean copy number normalized to disomic region	Mean Rounded Copy Number	Standard deviation	Standard error of the mean
AMS4107	Chr1	Left disomy	2117999	1.84	2	2	0.297154	0.0045776
		Left break	50521	5.19	5.6413	6	0.403299	0.0413776
		Center	103000	8.3	9.02174	9	0.650729	0.0454489
		Right break	64263	5.13	5.57609	6	0.485799	0.045301
		Right disomy	852595	1.84	2	2	0.275116	0.0067022
AMS4105	Chr1	Left disomy	2117999	1.68	2.14013	2	0.431948	0.0066532
		Left break	50521	3.13	3.98726	4	0.533265	0.0547118
		Center	103000	4.56	5.80892	6	0.670312	0.0468166
		Right break	64263	3.55	4.52229	5	0.583493	0.054411
		Right shoulder	778060	2.66	3.38854	3	0.505344	0.013009
		Far right break	20391	2.12	2.70064	3	0.326592	0.054432
		Right disomy	54162	1.57	2	2	0.323262	0.0344599
AMS4105	Chr3	Left disomy	1050245	1.75	2.00573	2	0.407809	0.0089397
		Far left break	93659	1.99	2.2808	2	0.992738	0.0729875
		Left shoulder	149713	2.31	2.64756	3	0.478368	0.0283859
		Left break	5487	3.16	3.62178	4	0.530839	0.167866
		Center	157541	3.02	3.46132	3	0.558752	0.0414175
		Right break	44598	2.1	2.40688	2	0.346361	0.0411055
		Right disomy	298055	1.74	1.99427	2	0.418054	0.0162481
AMS4397	Chr3	Left disomy	1050245	1.8	2	2	0.745039	0.0163321
		Far left break	100097	2.98	3.31	3	0.898	0.055
		Left shoulder	150029	2.73	3.03333	3	0.925457	0.0549158
		Left break	5487	5.23	5.81111	6	1.20999	0.382634
		Center	157541	8.1	9	9	2.63336	0.195198
		Right break	44598	5.53	6.14444	6	1.8328	0.217513
		Right disomy	291301	1.8	2	2	0.783136	0.0304374
AMS4104	Chr3	Left disomy	1300371	1.66	2	2	0.414075	0.0081505
		Left break	5487	6.18	7.45	7	0.39	0.15
		Center	157541	10.52	12.6747	13	1.62491	0.11979
		Right break	44598	5.5	6.62651	7	0.761958	0.0879833
		Right disomy	291301	1.66	2	2	0.436297	0.0169572
AMS4106	Chr4	Left disomy	531791	1.69	1.95376	2	0.378798	0.0117235
		Left break	18849	2.32	2.68208	3	0.310482	0.0510428
		Center	115473	3.36	3.88439	4	0.584175	0.0385193
		Right break	29932	2.51	2.90173	3	0.559095	0.083345
		Right disomy	907214	1.77	2.04624	2	1.31892	0.0312878
AMS4444	Chr4	Left disomy	531791	1.63	2	2	0.78073	0.024163
		Left break	18849	2.82	3.46012	3	1.32658	0.218088
		Center	225246	3.68	4.51534	5	1.91288	0.0930072
		Right Break	1609	2.43	2.9816	3	0.196	0.139
		Right trisomy	825764	2.26	2.77301	3	1.58732	0.0394494
AMS4702	Chr4	Left disomy	671261	1.75	1.96078	2	0.279097	0.0076761
		Left break	29932	5.13	5.7479	6	0.495355	0.0644897
		Center	147073	8.34	9.34454	9	1.38184	0.0807282
		Right Break	45428	5.21	5.83754	6	0.510817	0.0538448
		Right disomy	709562	1.82	2.03922	2	1.03172	0.0277129
